# Supplementary material for: Template switching during DNA replication is a prevalent source of adaptive gene amplification
Source: PubMed Central journal article supplement — bioRxiv. 2024 Oct 15:2024.05.03.589936. Preprint. [Version 2] doi: 10.1101/2024.05.03.589936 (PMC11507740; doi:10.1101/2024.05.03.589936), 2024-10-15
Supplement: NIHPP2024.05.03.589936v2-supplement-3.pdf [file NIHPP2024.05.03.589936v2-supplement-3.pdf]

## Supplementary Tables

**Supplementary Table 1. Summary of genome sequence analysis of clones containing a single copy of the *GAP1* CNV reporter.** Estimated copy number of the *GAP1* gene and inserted GFP gene of sequenced clones from five 1-copy-GFP minor subpopulations of the WT genome architecture strain. Copy number estimation is defined as the read depth of the target gene relative to the average read depth of the chromosome XI. Populations 1, 2, 4, 5 contain clones harboring *GAP1* CNVs but only 1 copy of GFP. Clones from population 3 and 5 harbor 1 copy each of *GAP1* and GFP suggesting these lineages have beneficial mutations elsewhere in the genome, allowing coexistence with the *GAP1* CNV major subpopulation. CN, copy number, CNV = copy number variant, *GAP1* = general amino acid permease gene

| Sample | Generation | Chemostat | Population | Background Strain | <i>GAP1</i> CN | GFP CN | Left CNV Boundary Feature          | Right CNV Boundary Feature | CNV Mechanism |
|--------|------------|-----------|------------|-------------------|----------------|--------|------------------------------------|----------------------------|---------------|
| 3150   | 182        | H03       | 1          | WT                | 5              | 1      | Between <i>GFP</i> and <i>GAP1</i> | DYN1                       | ODIRA         |
| 3171   | 182        | H03       | 1          | WT                | 3              | 1      | Between <i>GFP</i> and <i>GAP1</i> | TIF1                       | ODIRA         |
| 3172   | 182        | H03       | 1          | WT                | 3              | 1      | Between <i>GFP</i> and <i>GAP1</i> | DYN1                       | ODIRA         |
| 3173   | 182        | H03       | 1          | WT                | 3              | 1      | Between <i>GFP</i> and <i>GAP1</i> | DYN1                       | ODIRA         |
| 3174   | 182        | H03       | 1          | WT                | 3              | 1      | kanamycin CDS                      | NUP133                     | ODIRA         |
| 3151   | 153        | G04       | 2          | WT                | 3              | 1      | Between <i>GFP</i> and <i>GAP1</i> | RPF2                       | ODIRA         |
| 3152   | 153        | G04       | 2          | WT                | 3              | 1      | Between <i>GFP</i> and <i>GAP1</i> | GLG1                       | ODIRA         |
| 3153   | 153        | G04       | 2          | WT                | 3              | 1      | kanamycin promoter                 | MRS4                       | ODIRA         |
| 3154   | 153        | G04       | 2          | WT                | 3              | 1      | Between <i>GFP</i> and <i>GAP1</i> | RPF2                       | ODIRA         |
| 3155   | 153        | G04       | 2          | WT                | 2              | 1      | Between <i>GFP</i> and <i>GAP1</i> | LTR YKRC□12 or tRNA        | unresolved    |
| 3156   | 182        | H05       | 3          | WT                | 1              | 1      | No ChrXI CNV                       | No ChrXI CNV               | NA            |
| 3157   | 182        | H05       | 3          | WT                | 1              | 1      | No ChrXI CNV                       | No ChrXI CNV               | NA            |
| 3158   | 182        | H05       | 3          | WT                | 1              | 1      | No ChrXI CNV                       | No ChrXI CNV               | NA            |
| 3175   | 182        | H05       | 3          | WT                | 1              | 1      | No ChrXI CNV                       | No ChrXI CNV               | NA            |
| 3176   | 182        | H05       | 3          | WT                | 1              | 1      | No ChrXI CNV                       | No ChrXI CNV               | NA            |
| 3177   | 182        | H05       | 3          | WT                | 1              | 1      | No ChrXI CNV                       | No ChrXI CNV               | NA            |
| 3178   | 182        | H05       | 3          | WT                | 1              | 1      | No ChrXI CNV                       | No ChrXI CNV               | NA            |
| 3179   | 182        | H05       | 3          | WT                | 1              | 1      | No ChrXI CNV                       | No ChrXI CNV               | NA            |
| 3180   | 182        | H05       | 3          | WT                | 1              | 1      | No ChrXI CNV                       | No ChrXI CNV               | NA            |
| 3181   | 182        | H05       | 3          | WT                | 1              | 1      | No ChrXI CNV                       | No ChrXI CNV               | NA            |
| 3182   | 182        | H05       | 3          | WT                | 1              | 1      | No ChrXI CNV                       | No ChrXI CNV               | NA            |
| 3159   | 166        | G06       | 4          | WT                | 3              | 1      | kanamycin promoter                 | Between YKR041W and UTH1   | ODIRA         |
| 3160   | 166        | G06       | 4          | WT                | 3              | 1      | kanamycin promoter                 | Between YKR041W and UTH1   | ODIRA         |
| 3162   | 166        | G06       | 4          | WT                | 3              | 1      | kanamycin promoter                 | Between YKR041W and UTH1   | ODIRA         |
| 3163   | 166        | G06       | 4          | WT                | 3              | 1      | kanamycin CDS                      | ARS1118                    | ODIRA         |
| 3164   | 182        | H07       | 5          | WT                | 1              | 1      | No <i>GAP1</i> CNV                 | No <i>GAP1</i> CNV         | NA            |
| 3165   | 182        | H07       | 5          | WT                | 3              | 1      | kanamycin CDS                      | MRS4                       | ODIRA         |
| 3166   | 182        | H07       | 5          | WT                | 3              | 1      | Between <i>GFP</i> and <i>GAP1</i> | UIP5                       | ODIRA         |
| 3167   | 182        | H07       | 5          | WT                | 3              | 1      | kanamycin CDS                      | MRS4                       | ODIRA         |
| 3168   | 182        | H07       | 5          | WT                | 3              | 1      | Between <i>GFP</i> and <i>GAP1</i> | UIP5                       | ODIRA         |

**Supplementary Table 2. Estimation of network confidence.** The coverage, defining the probability that the true parameter falls within the 95% highest density interval (HDI) of the posterior distribution, for 829 synthetic simulations in which the final reported *GAP1* CNV proportion is at least 0.3. 95% HDI was calculated for each simulation using 200 posterior samples. Our neural density estimator is slightly over-confident for  $\varphi$  (coverage of 0.934), and under-confident for *GAP1* CNV selection coefficient and formation rate (coverage of 0.992 for  $s_c$  and 0.995 for  $\delta_c$ ). Despite this under-confidence, the posterior distributions are narrow in biological terms: the 95% HDI represents less than an order of magnitude for both  $s_c$  and  $\delta_c$ . Thus, we did not apply post-training adjustments to the neural density estimator, such as calibration (Cook et al., 2006) or ensembles (Caspi et al., 2023; Hermans et al., 2022).

| Parameter  | Coverage |
|------------|----------|
| $s_c$      | 0.992    |
| $\delta_c$ | 0.995    |
| $\varphi$  | 0.934    |

**Supplementary Table 3. Inferred CNV mechanisms by strain.** Counts of inferred CNV mechanisms for each sequenced clone, n=177, separated by strain.

| CNV Mechanism       | WT | LTR $\Delta$ | ARS $\Delta$ | ALL $\Delta$ | Total |
|---------------------|----|--------------|--------------|--------------|-------|
| Aneuploid           | 1  | 5            | 0            | 0            | 6     |
| Complex CNV         | 3  | 3            | 3            | 14           | 23    |
| LTR NAHR            | 11 | 0            | 27           | 0            | 38    |
| NAHR                | 0  | 2            | 1            | 1            | 4     |
| ODIRA               | 22 | 42           | 11           | 12           | 87    |
| Transposon-mediated | 0  | 0            | 0            | 19           | 19    |
| Total               | 37 | 52           | 42           | 46           | 177   |

## Supplementary Figures

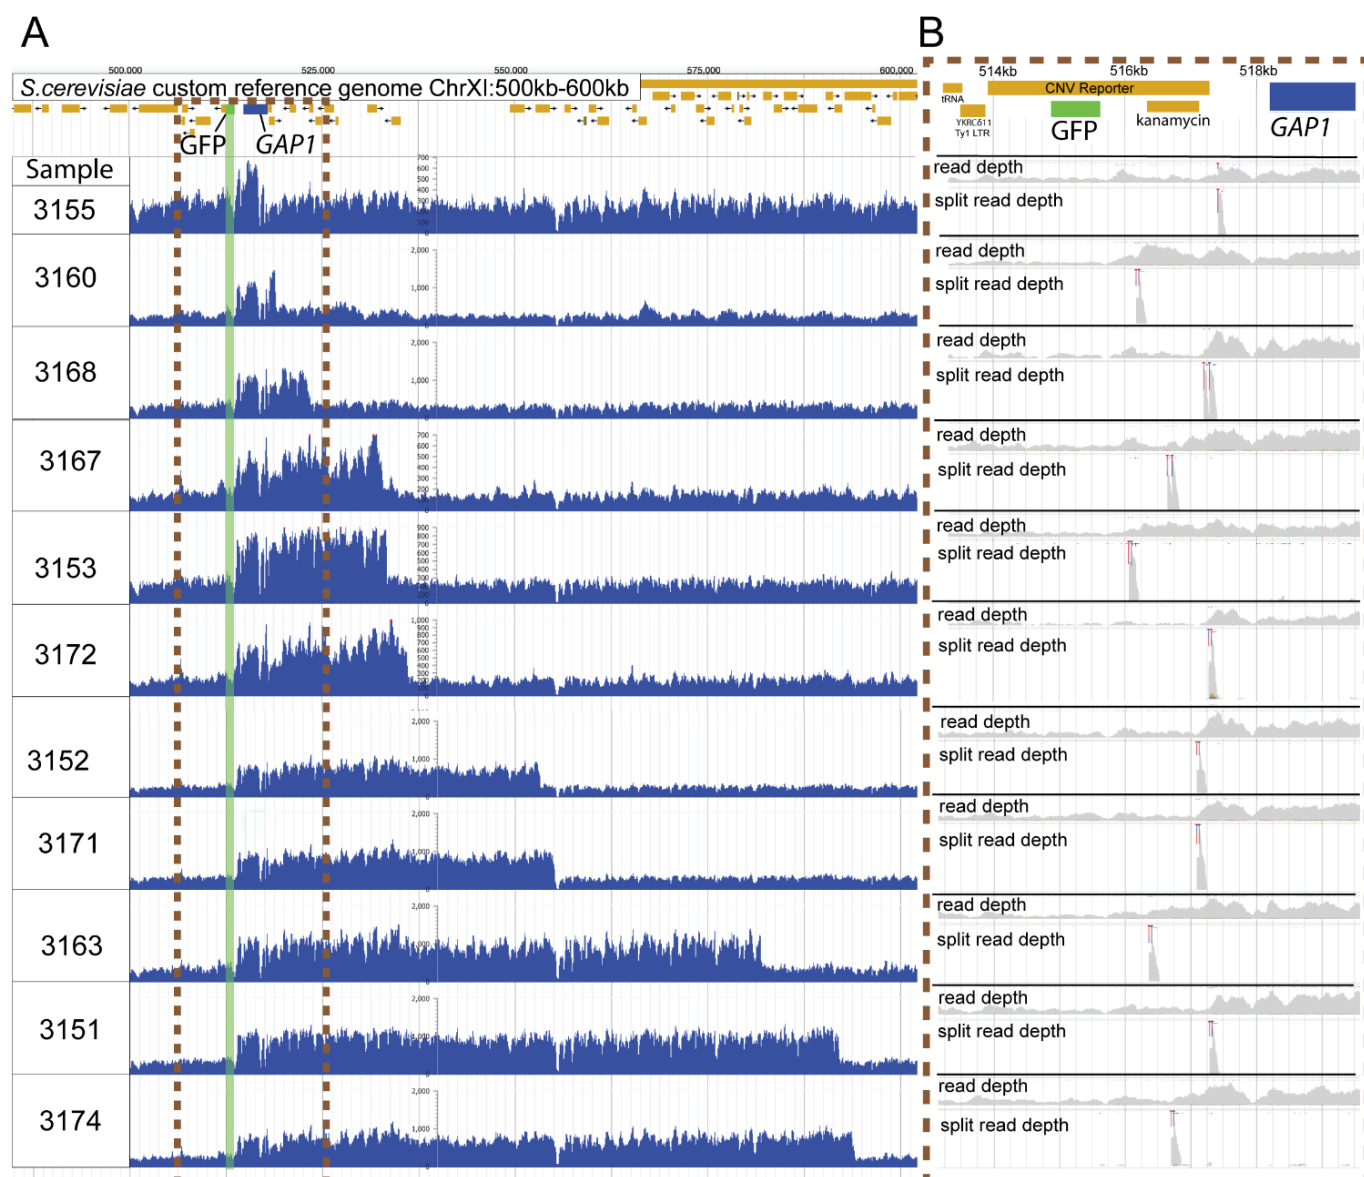

**Supplementary Figure 1. Independent *GAP1* amplifications lacking CNV reporter amplification.** (A) Read depth plots of the *GAP1* CNV reporter locus, ChrXI:500-600kb, of sequenced clones from 1-copy-*GFP* subpopulations isolated across five chemostats. Identification of eleven distinct CNVs, shown above, indicate the occurrence of at least eleven independent amplifications of *GAP1* without *GFP* co-amplification. Sequences were aligned to a custom reference genome containing the CNV reporter upstream of the *GAP1* gene. The CNV reporter comprises a *GFP* gene and kanamycin resistance gene. *GFP* reference gene - green rectangle, *GAP1* reference gene - blue rectangle. (B) Inset of the left-most CNV junction at the *GFP*, kanamycin, and *GAP1* region, ChrXI: 513193-519171 with genome read depth and split read depth tracks for each sample. The location of the split reads pileup (blue and red clipping marks) show the precise CNV breakpoint which is downstream of the *GFP* gene and upstream of the *GAP1* coding sequence for every clone indicating each lack an amplification of the inserted *GFP* gene.

## Wildtype population 1

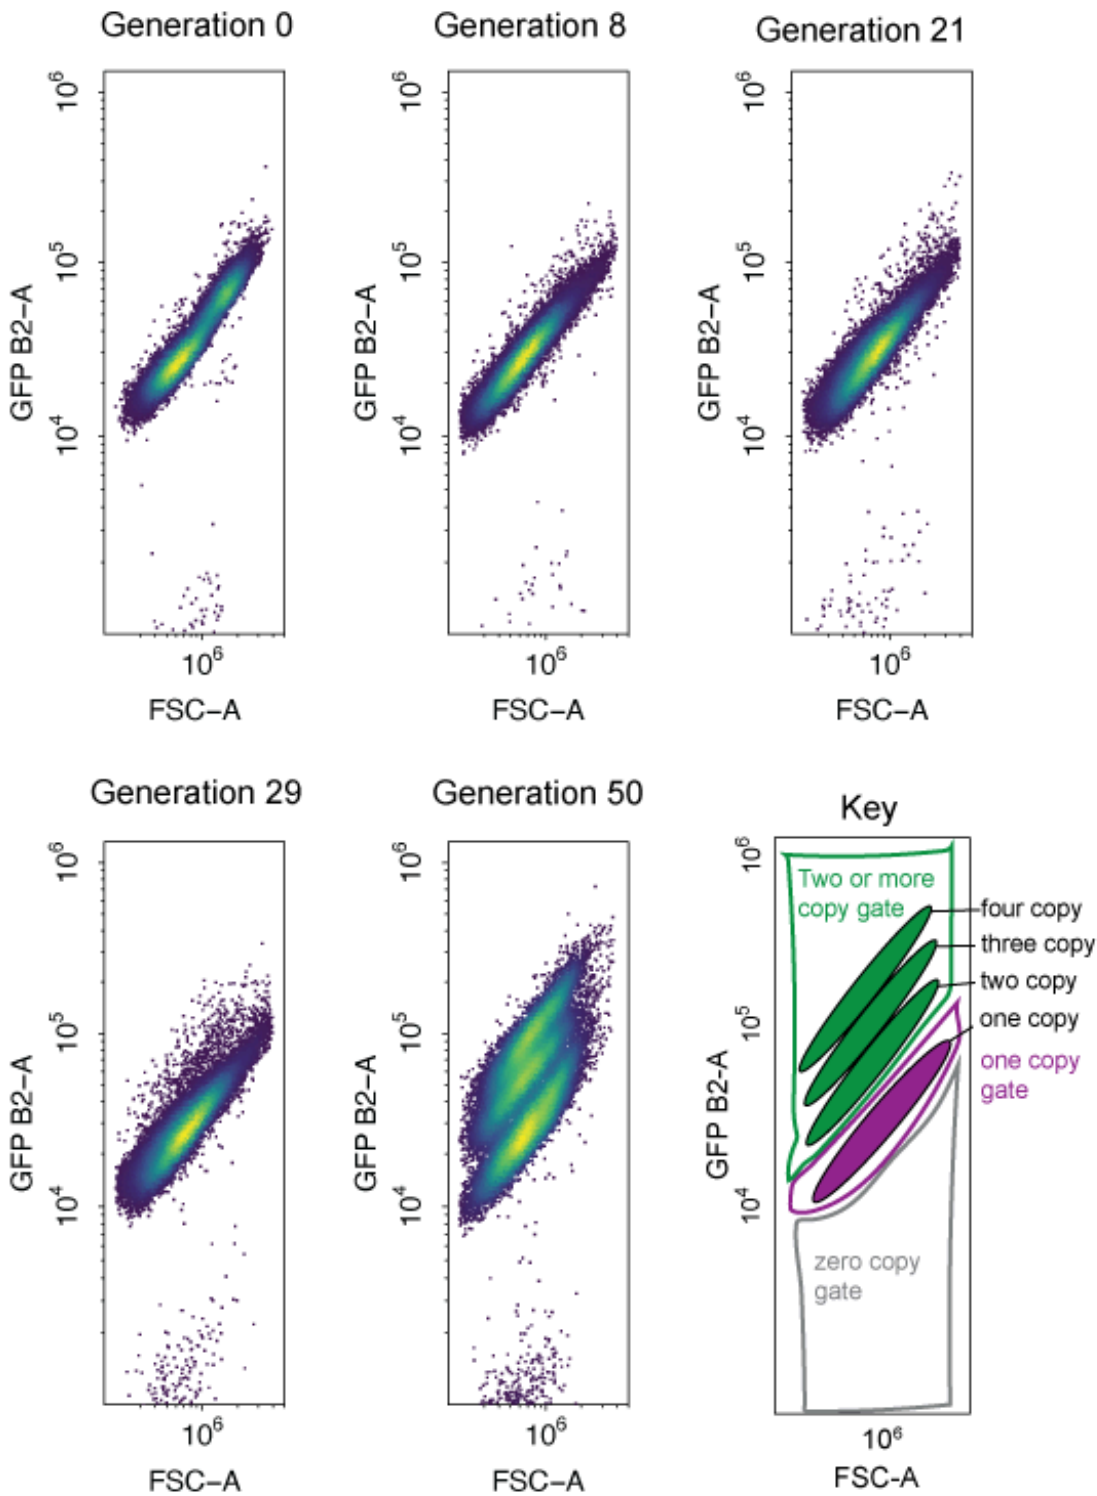

## Wildtype population 1

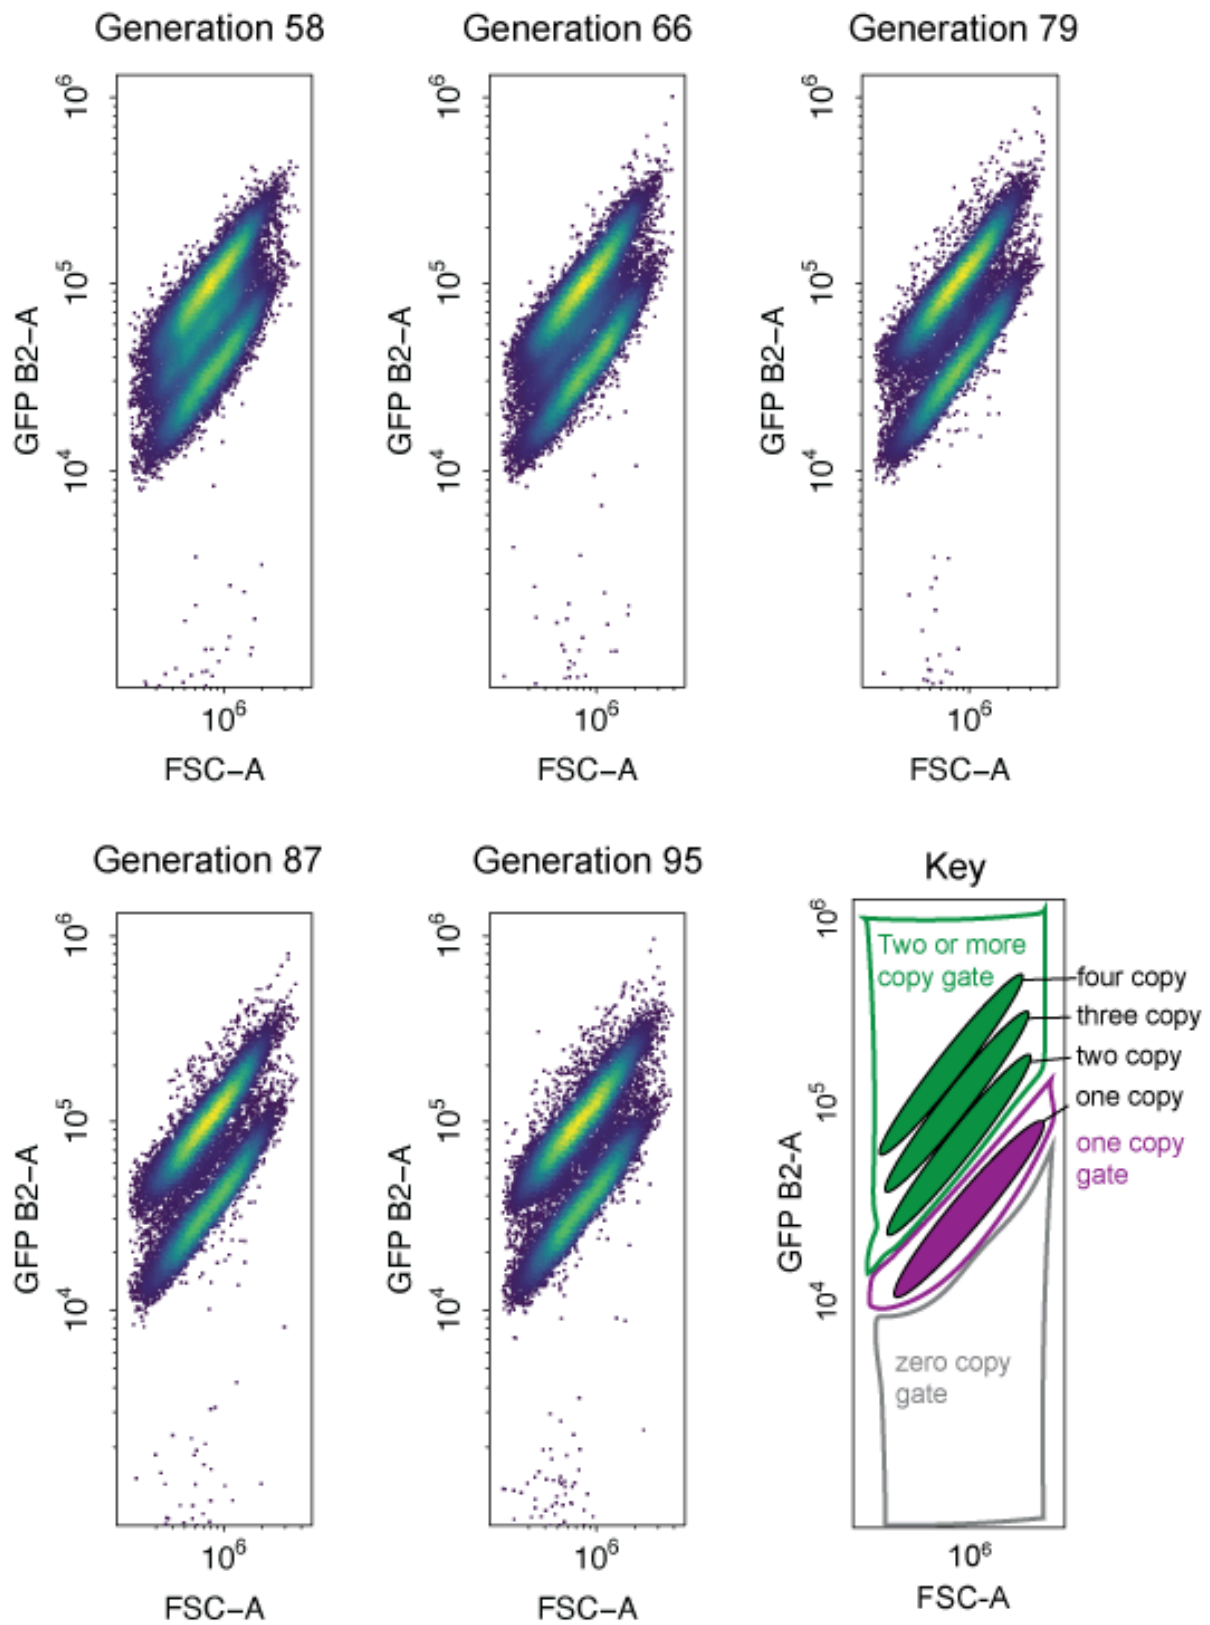

## Wildtype population 1

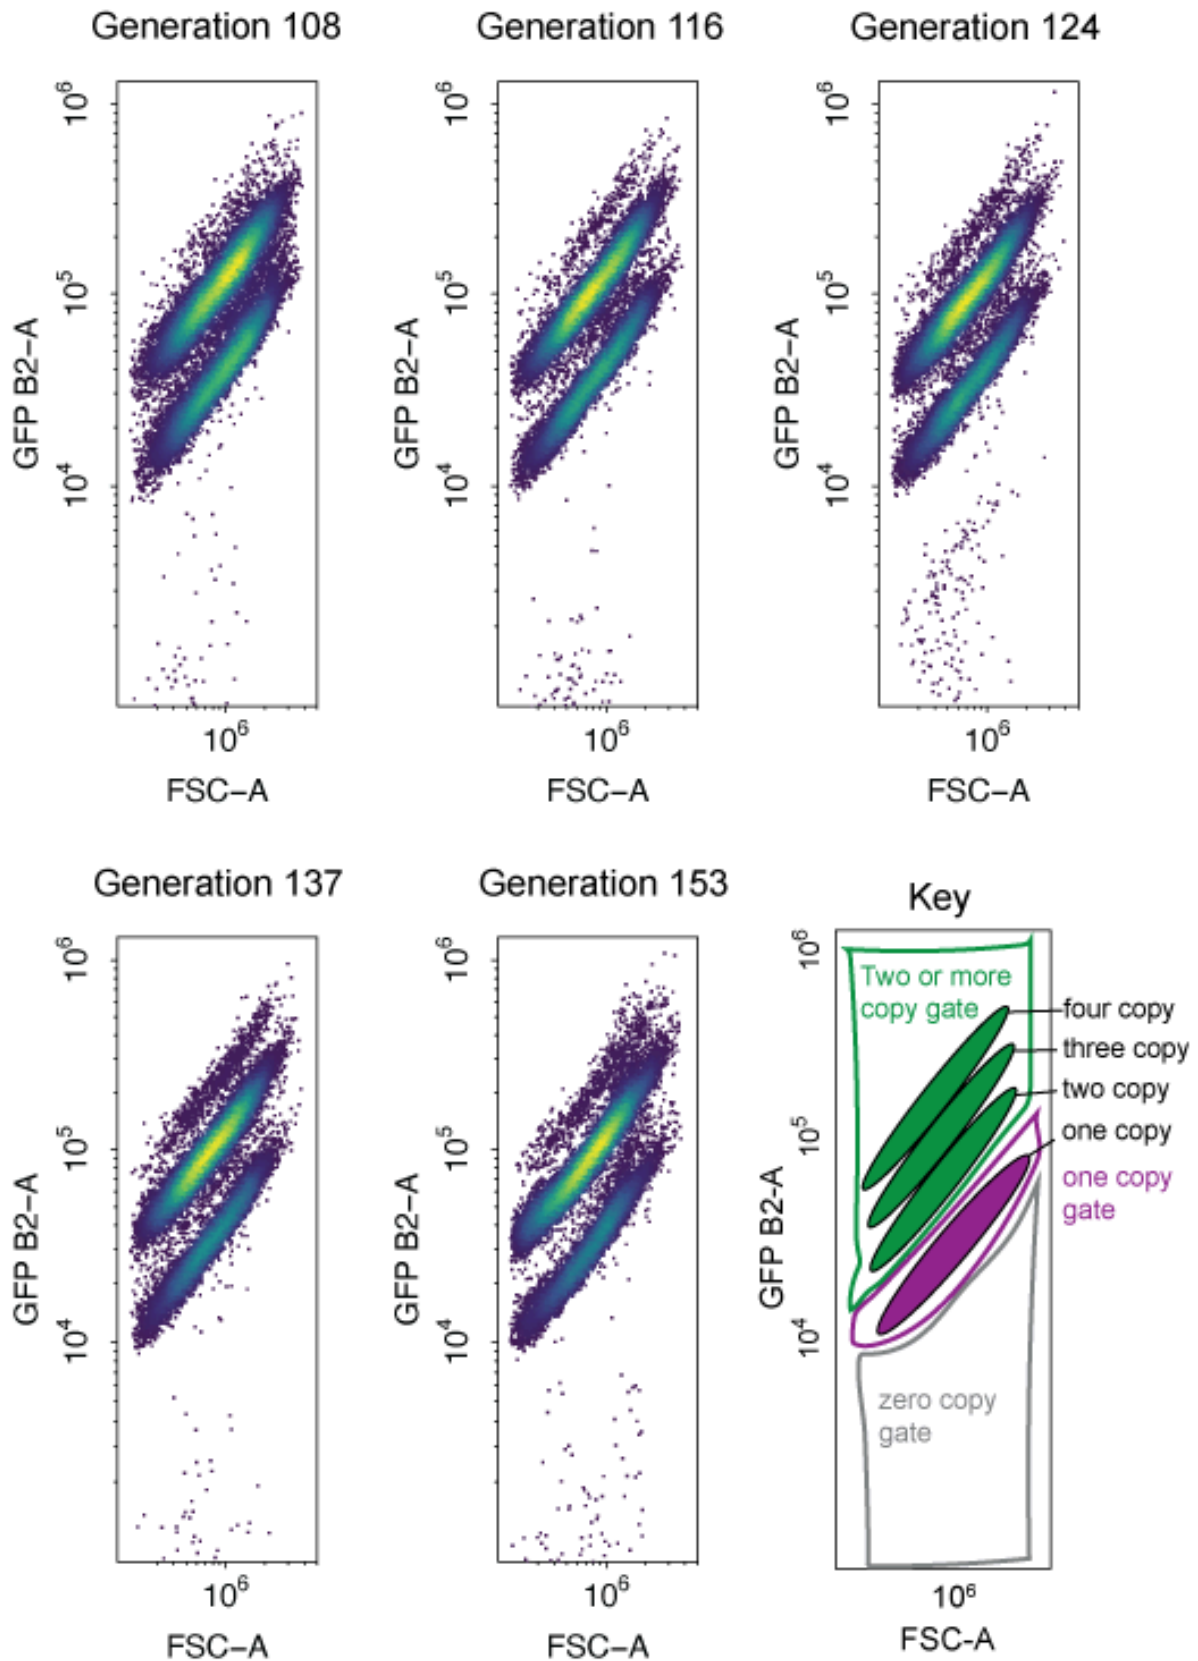

## Wildtype population 2

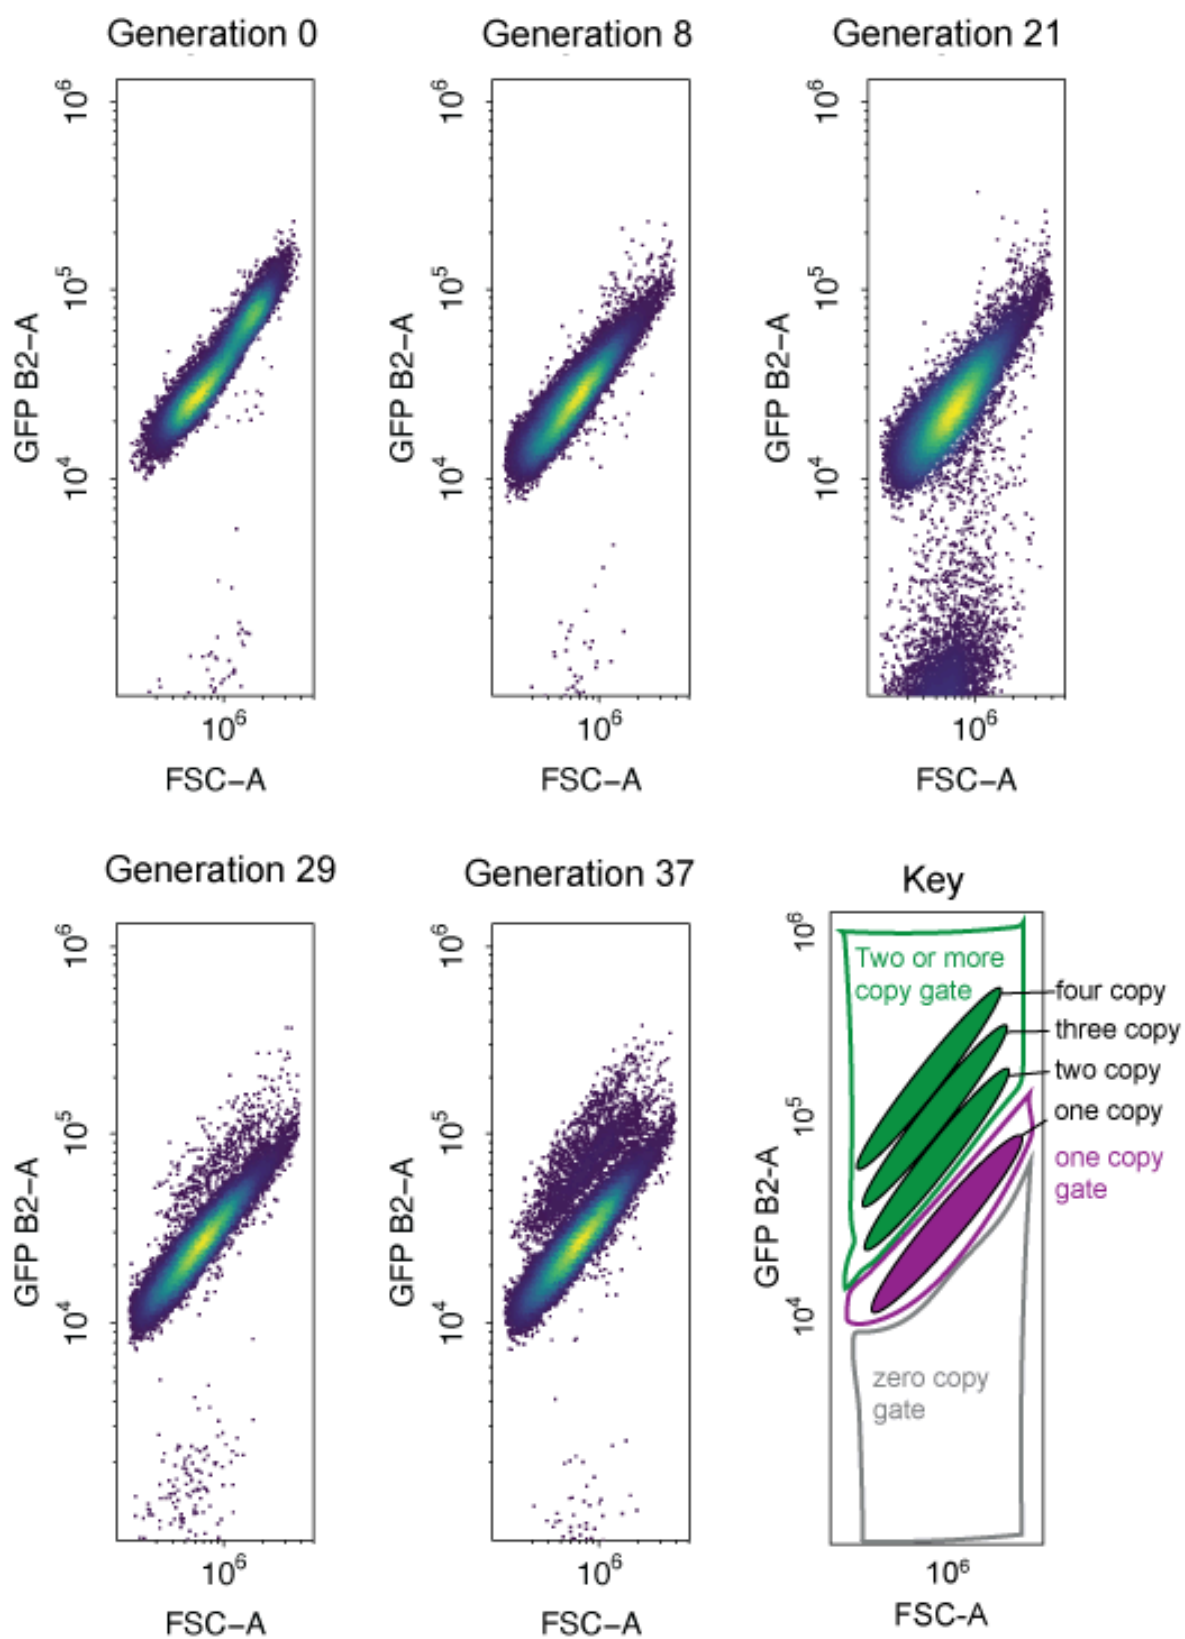

## Wildtype population 2

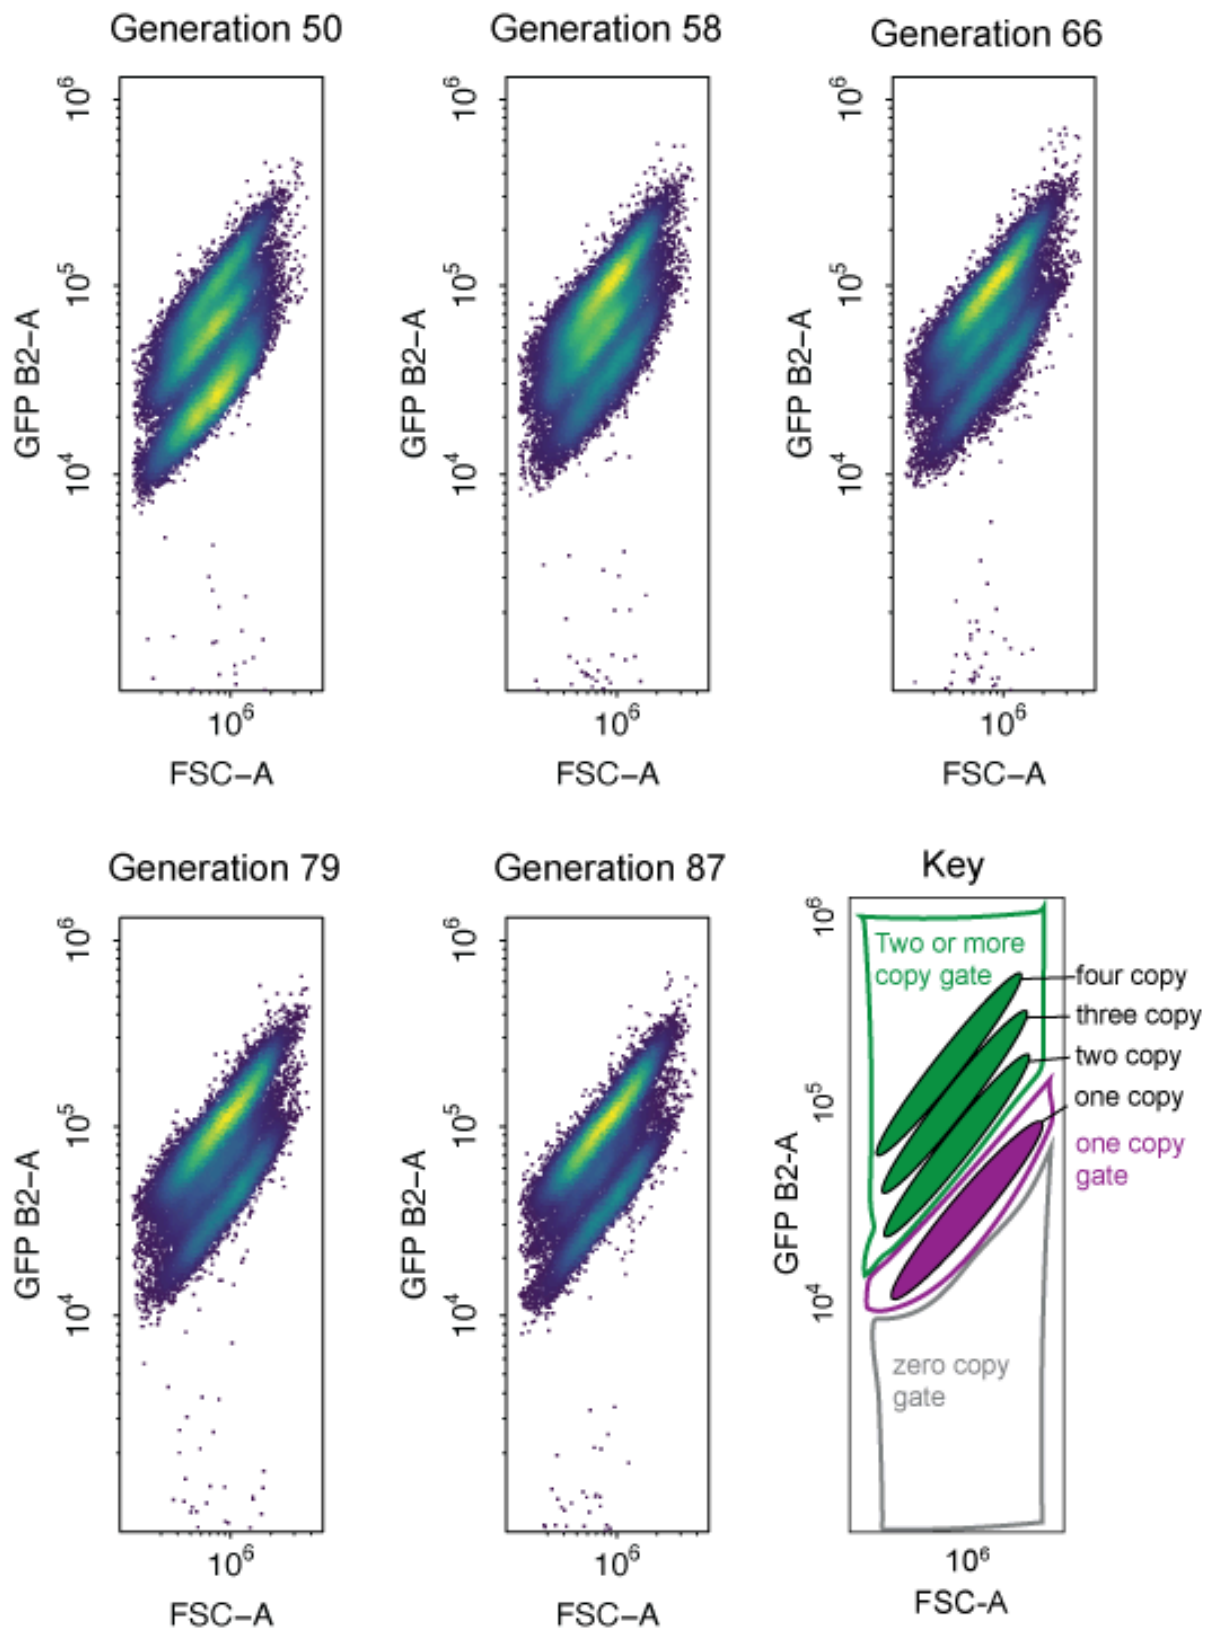



## Wildtype population 2

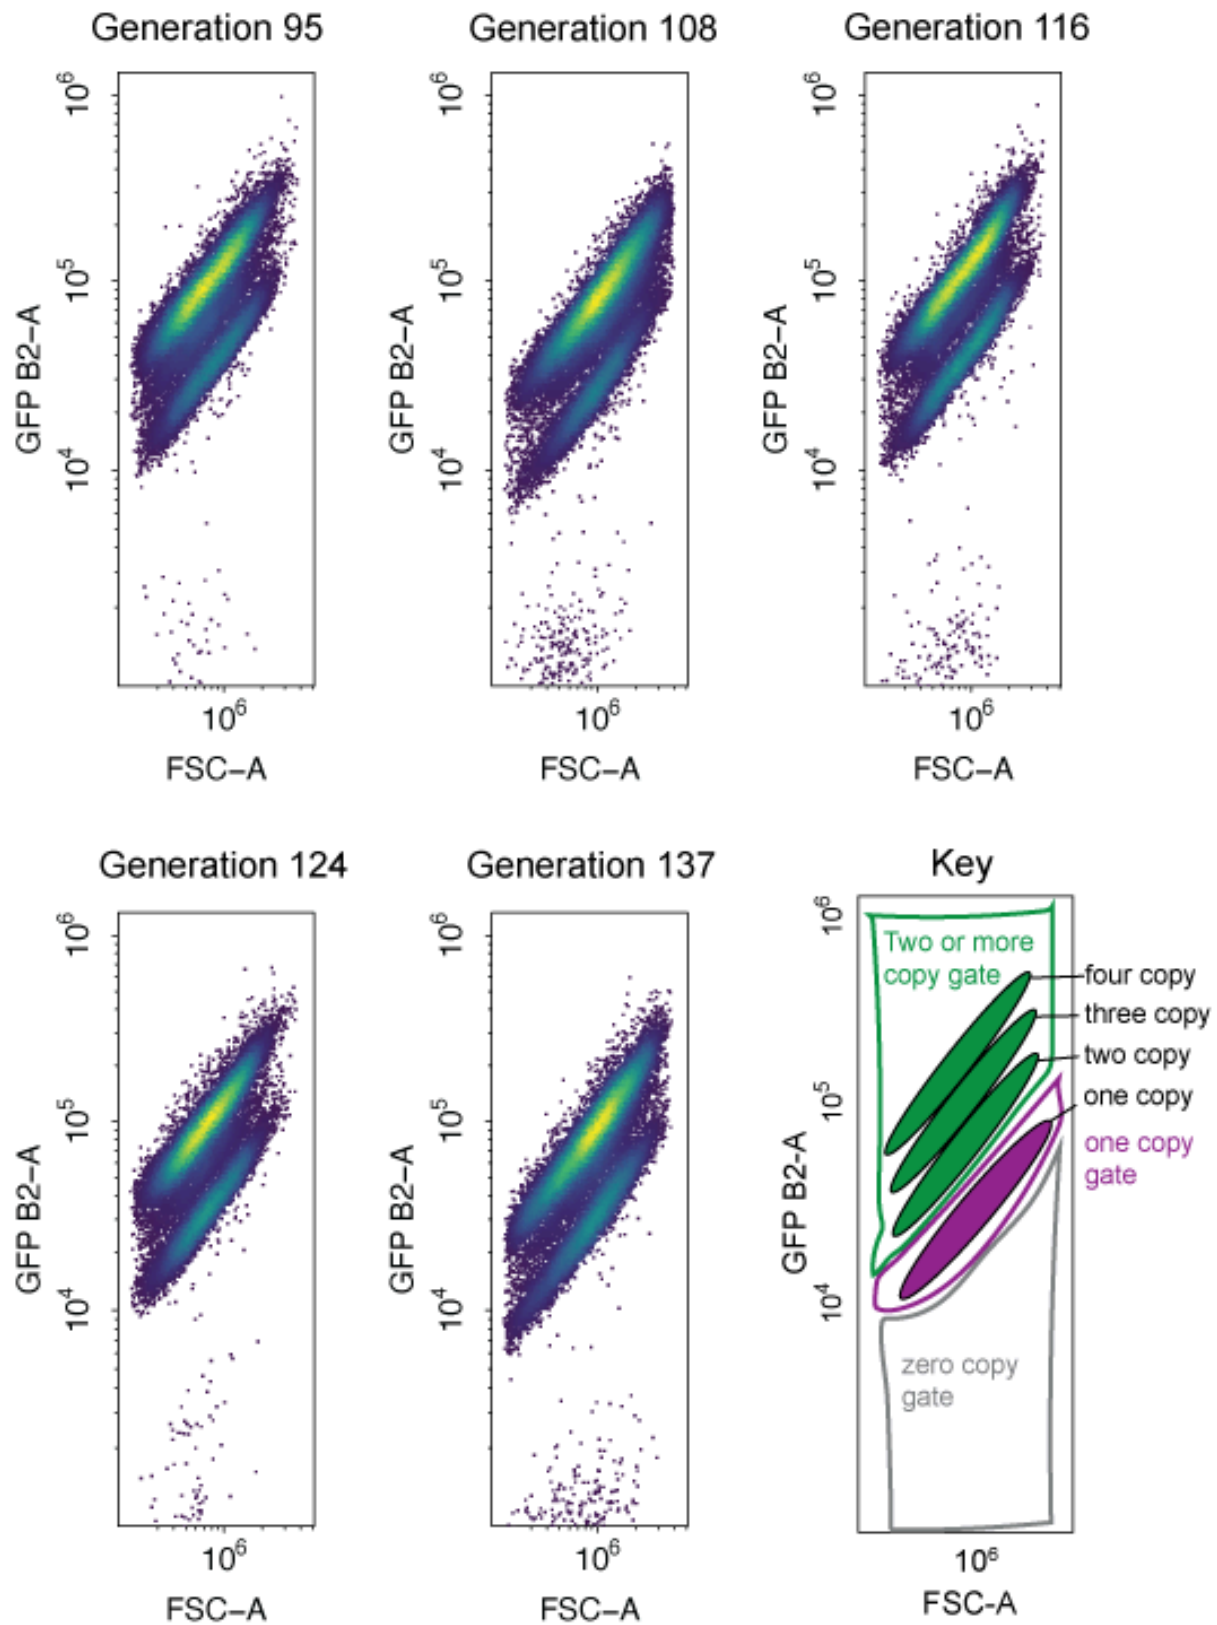

## Wildtype population 3

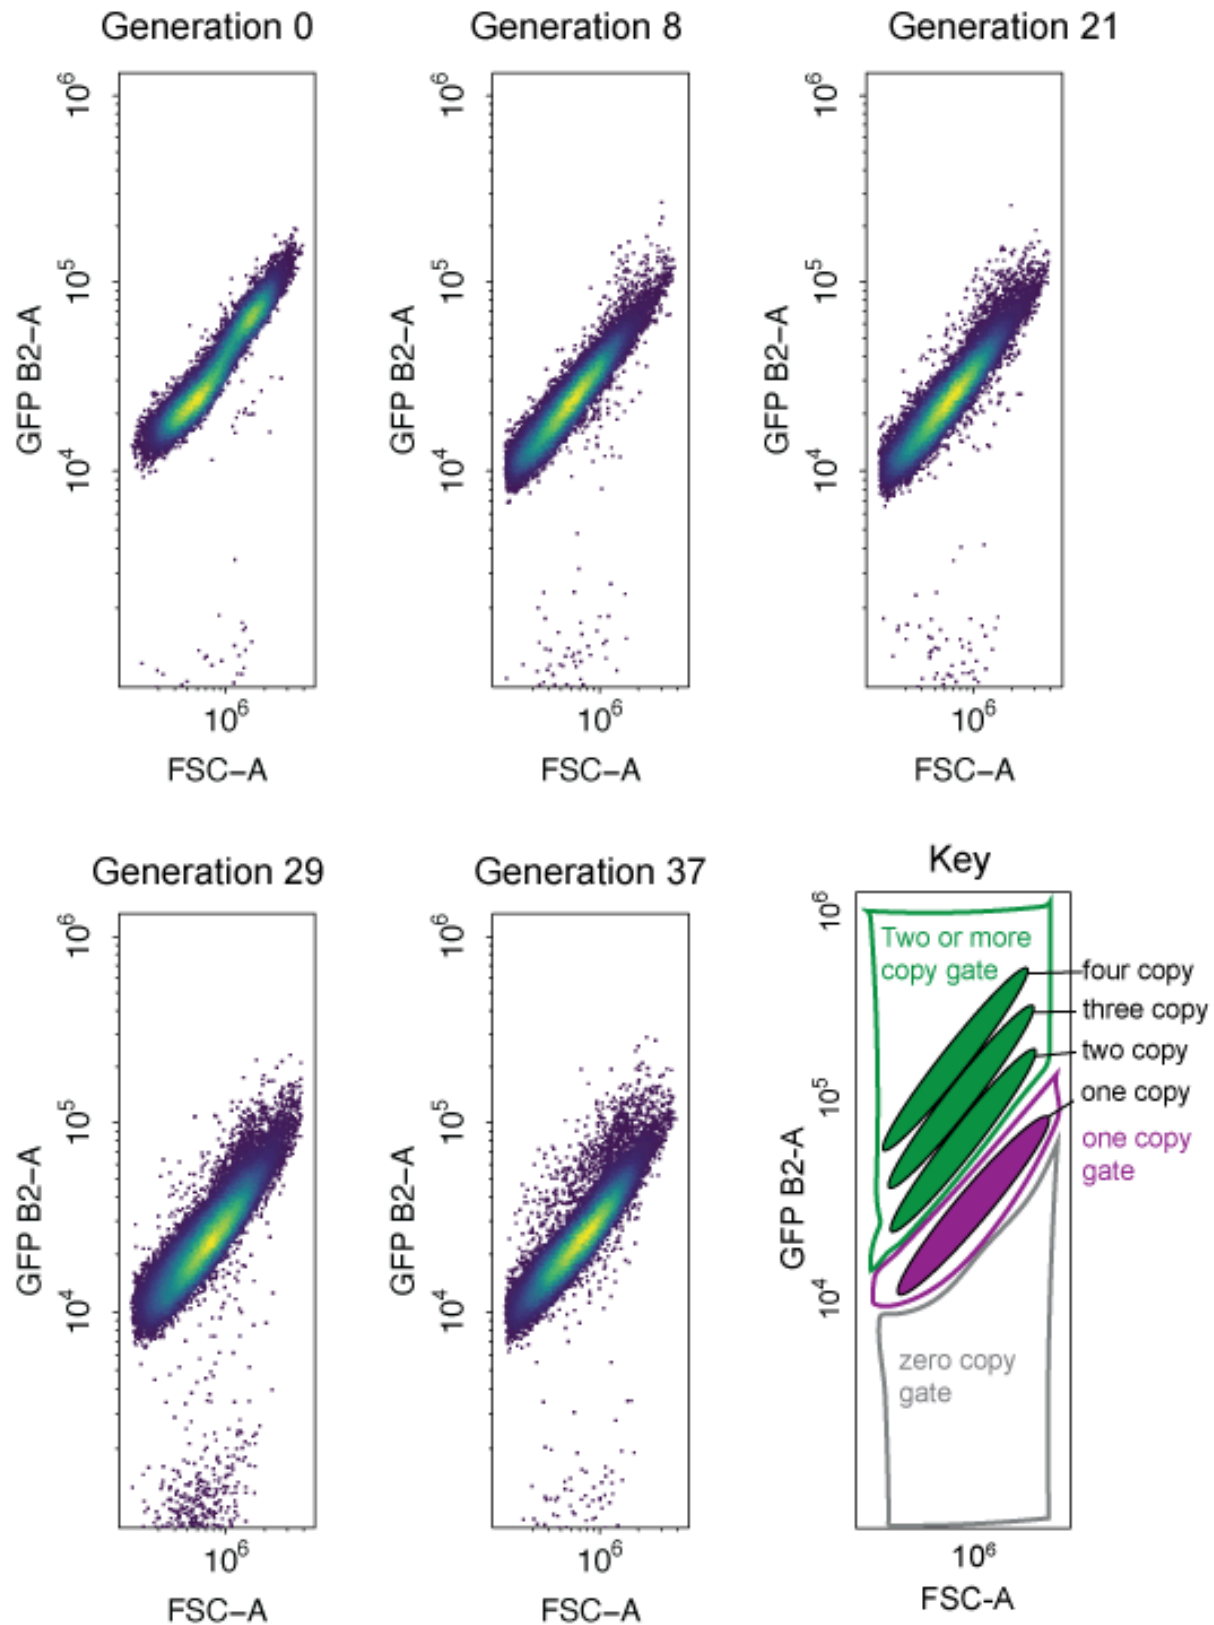

## Wildtype population 3

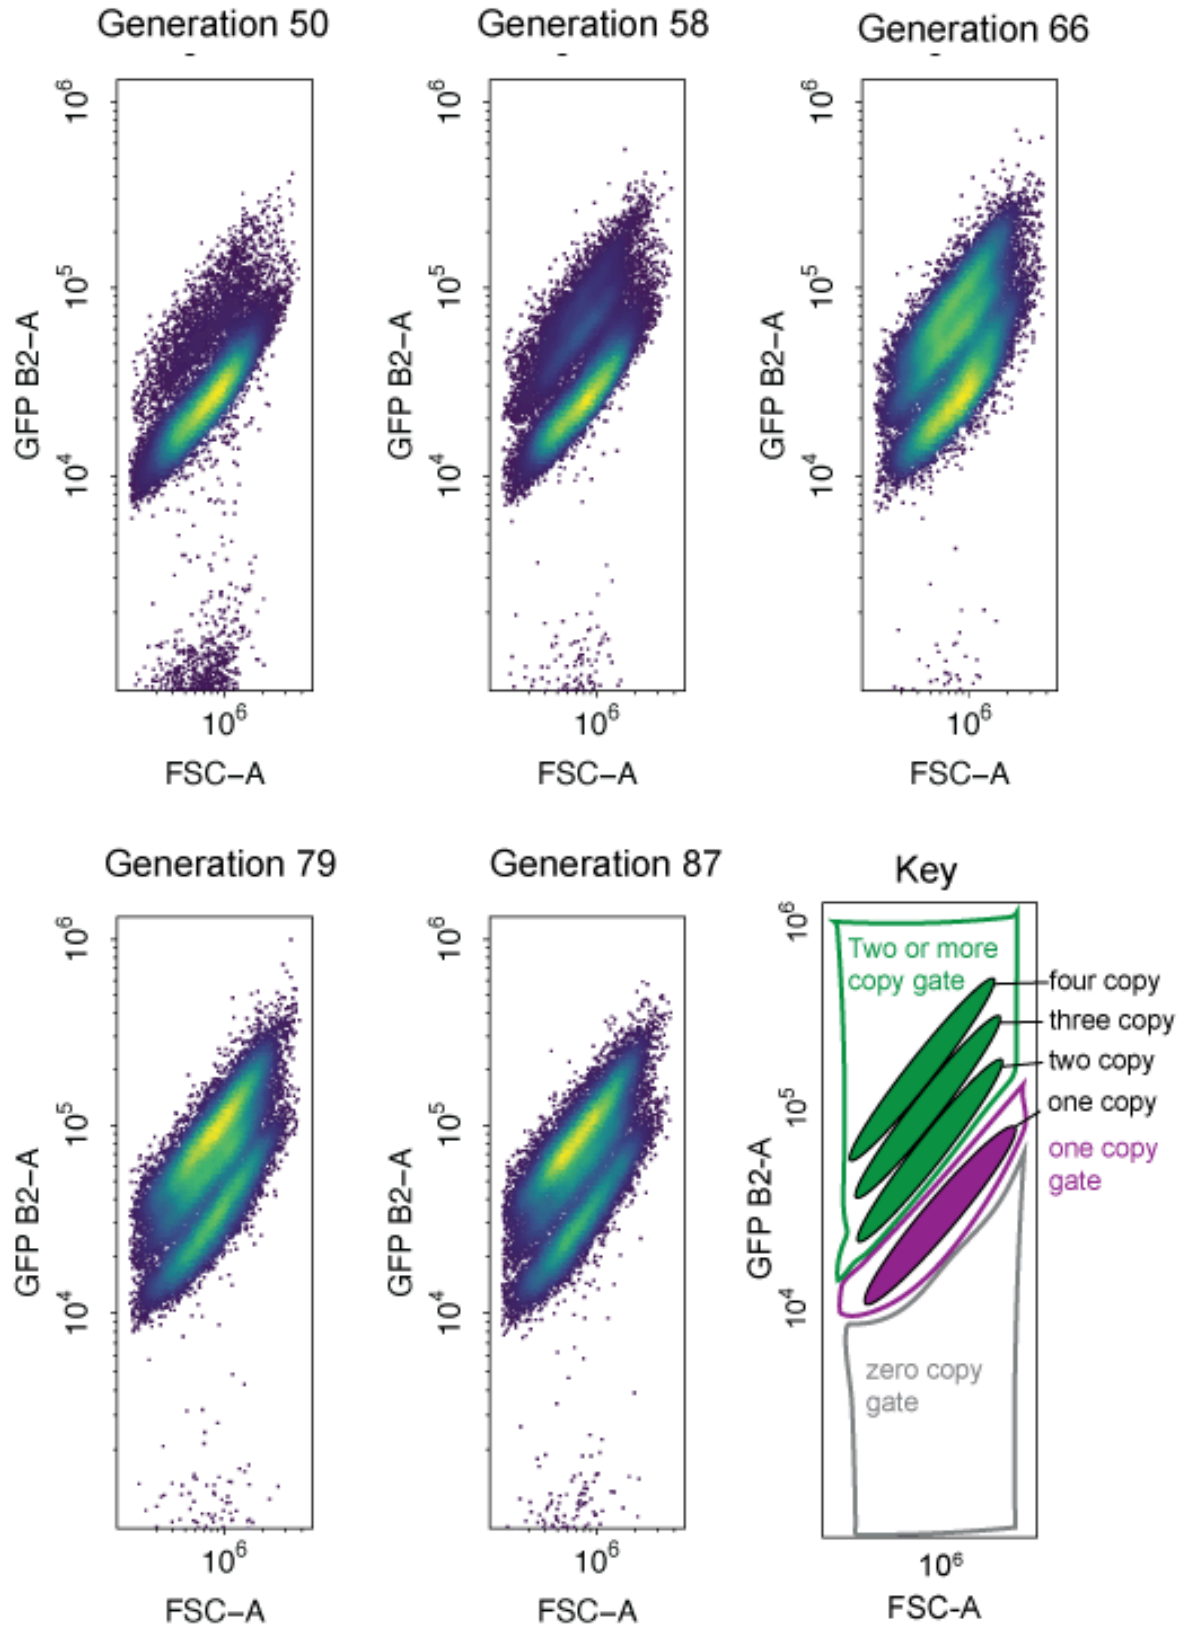

## Wildtype population 3

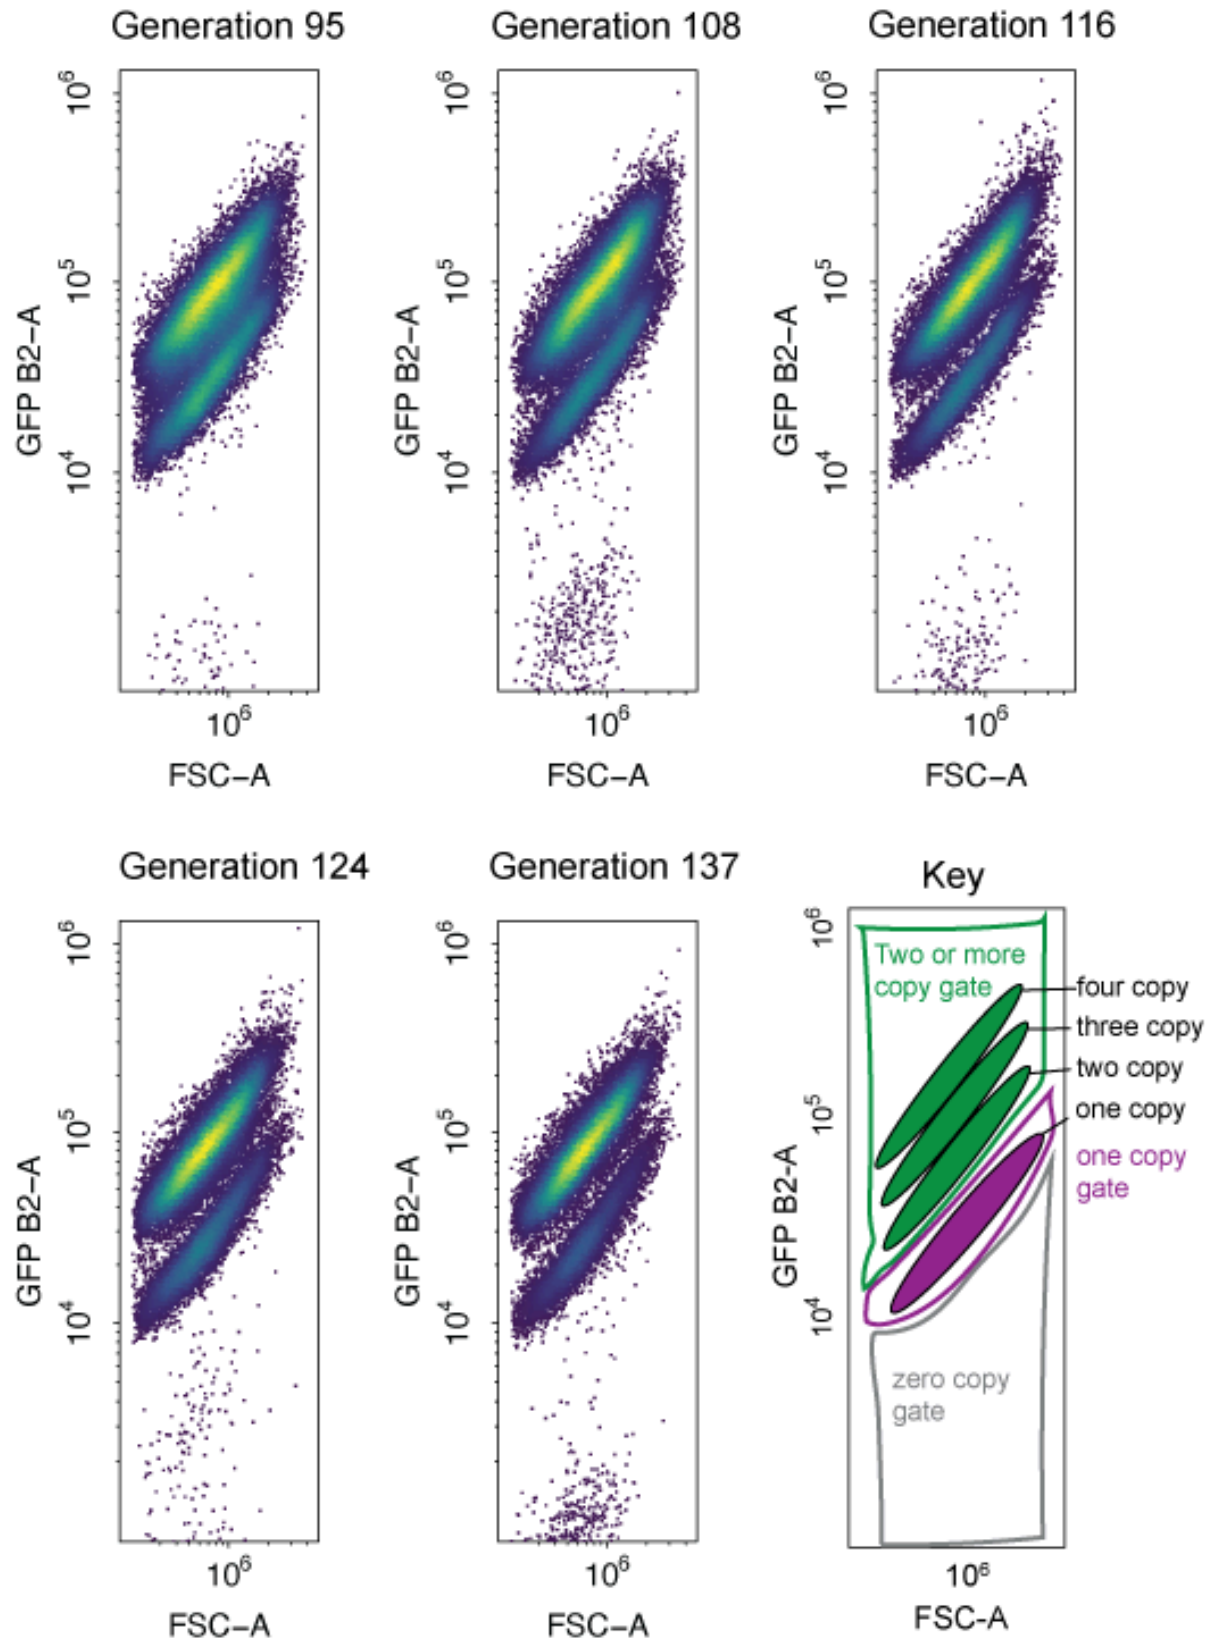

## Wildtype population 4

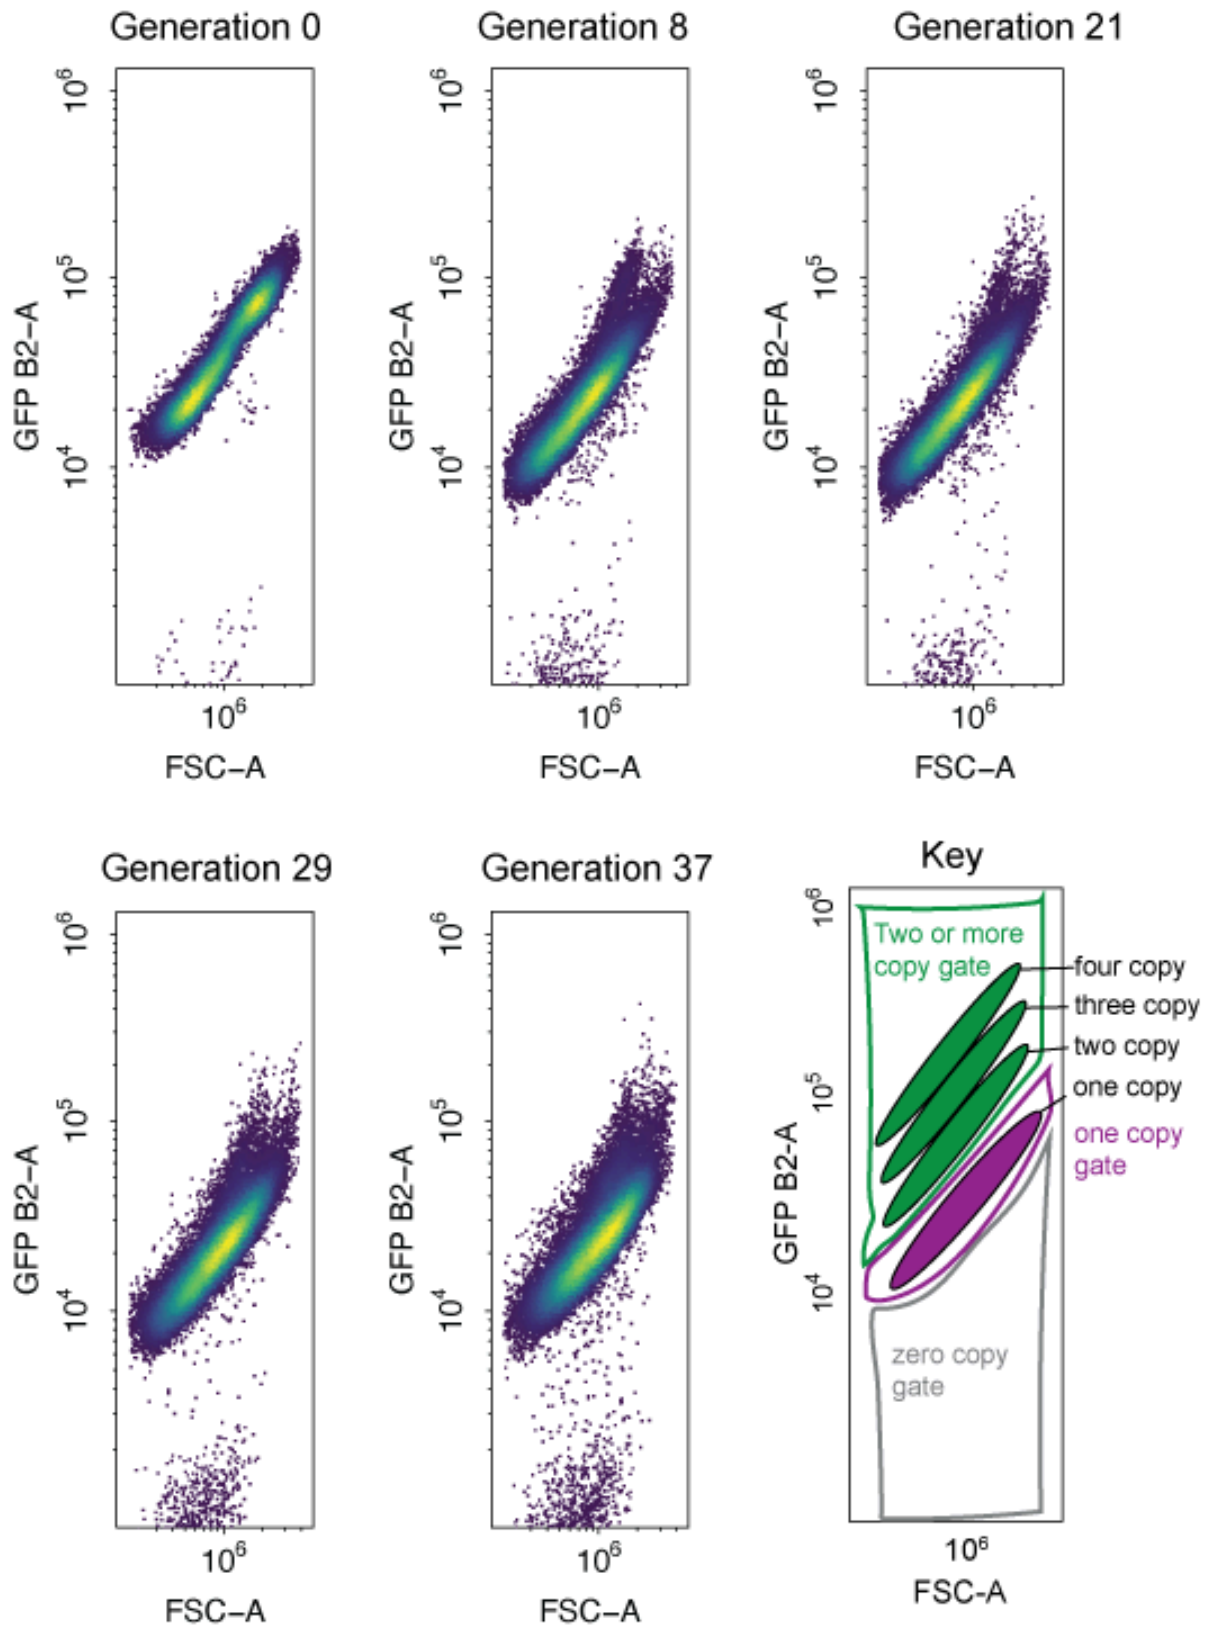

## Wildtype population 4

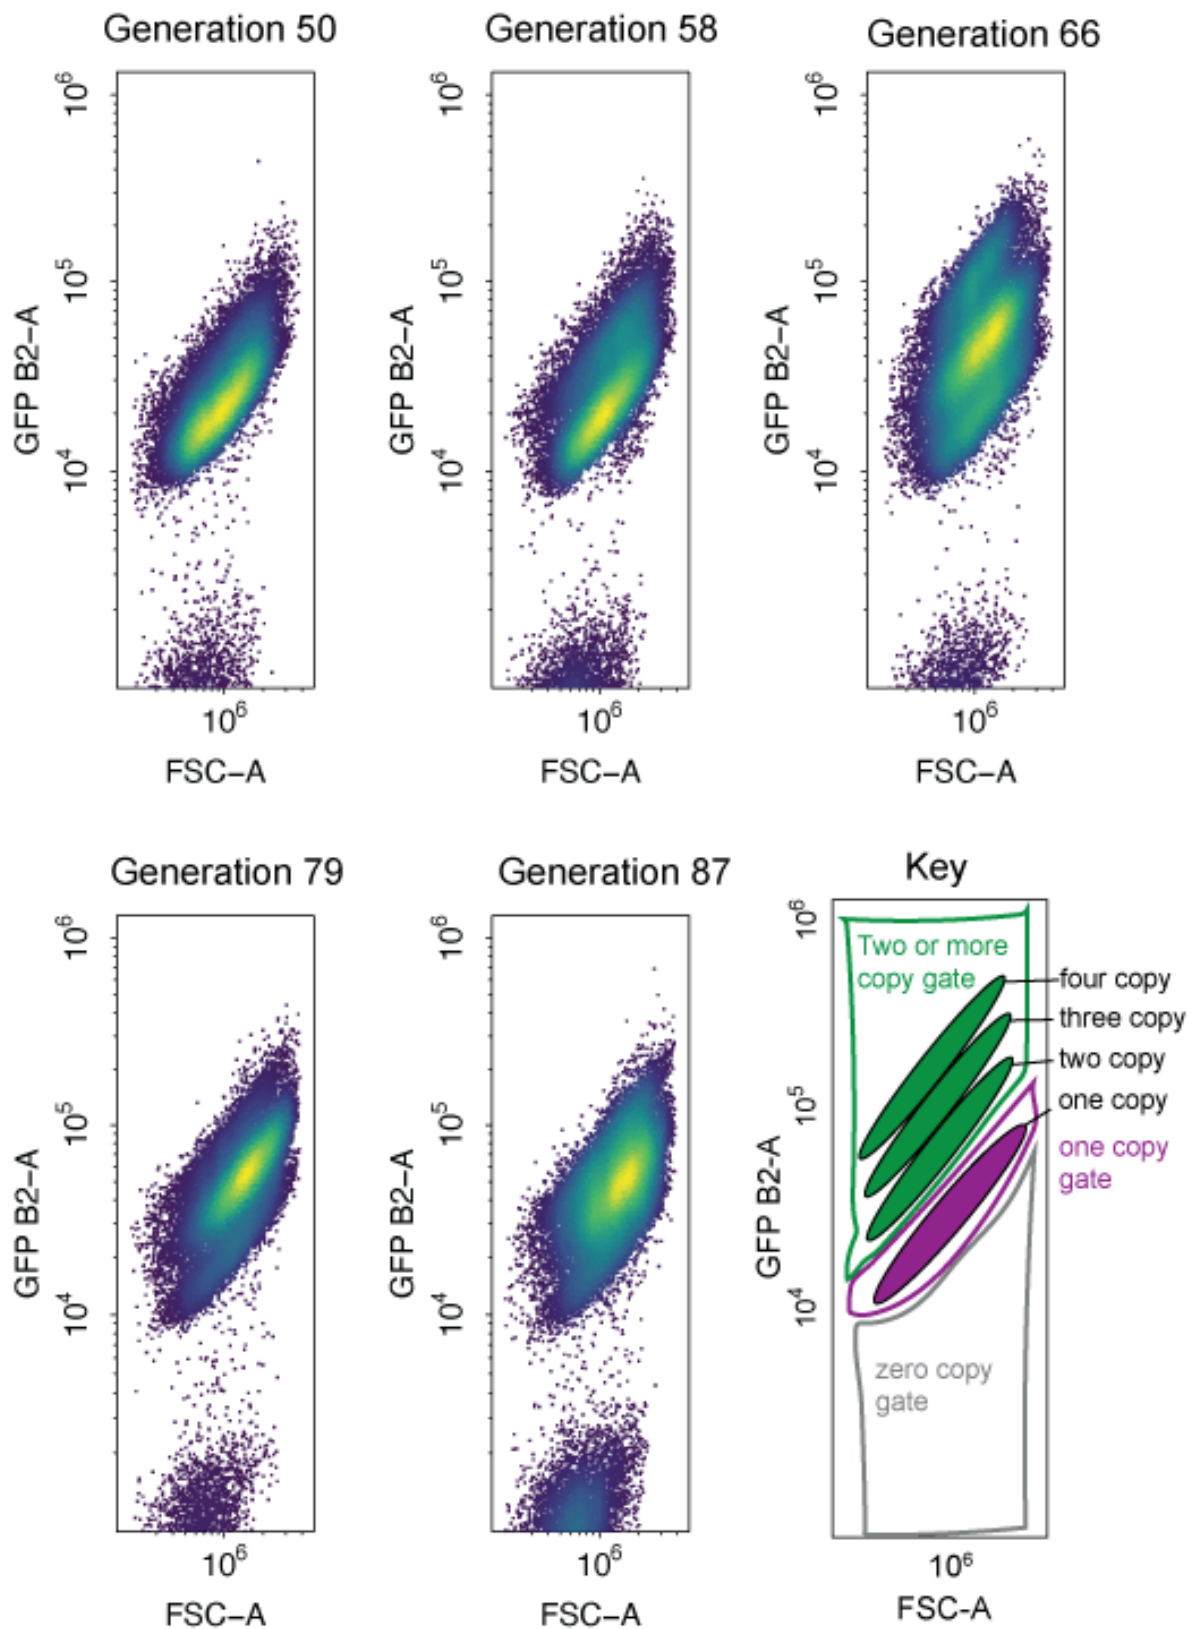

## Wildtype population 4

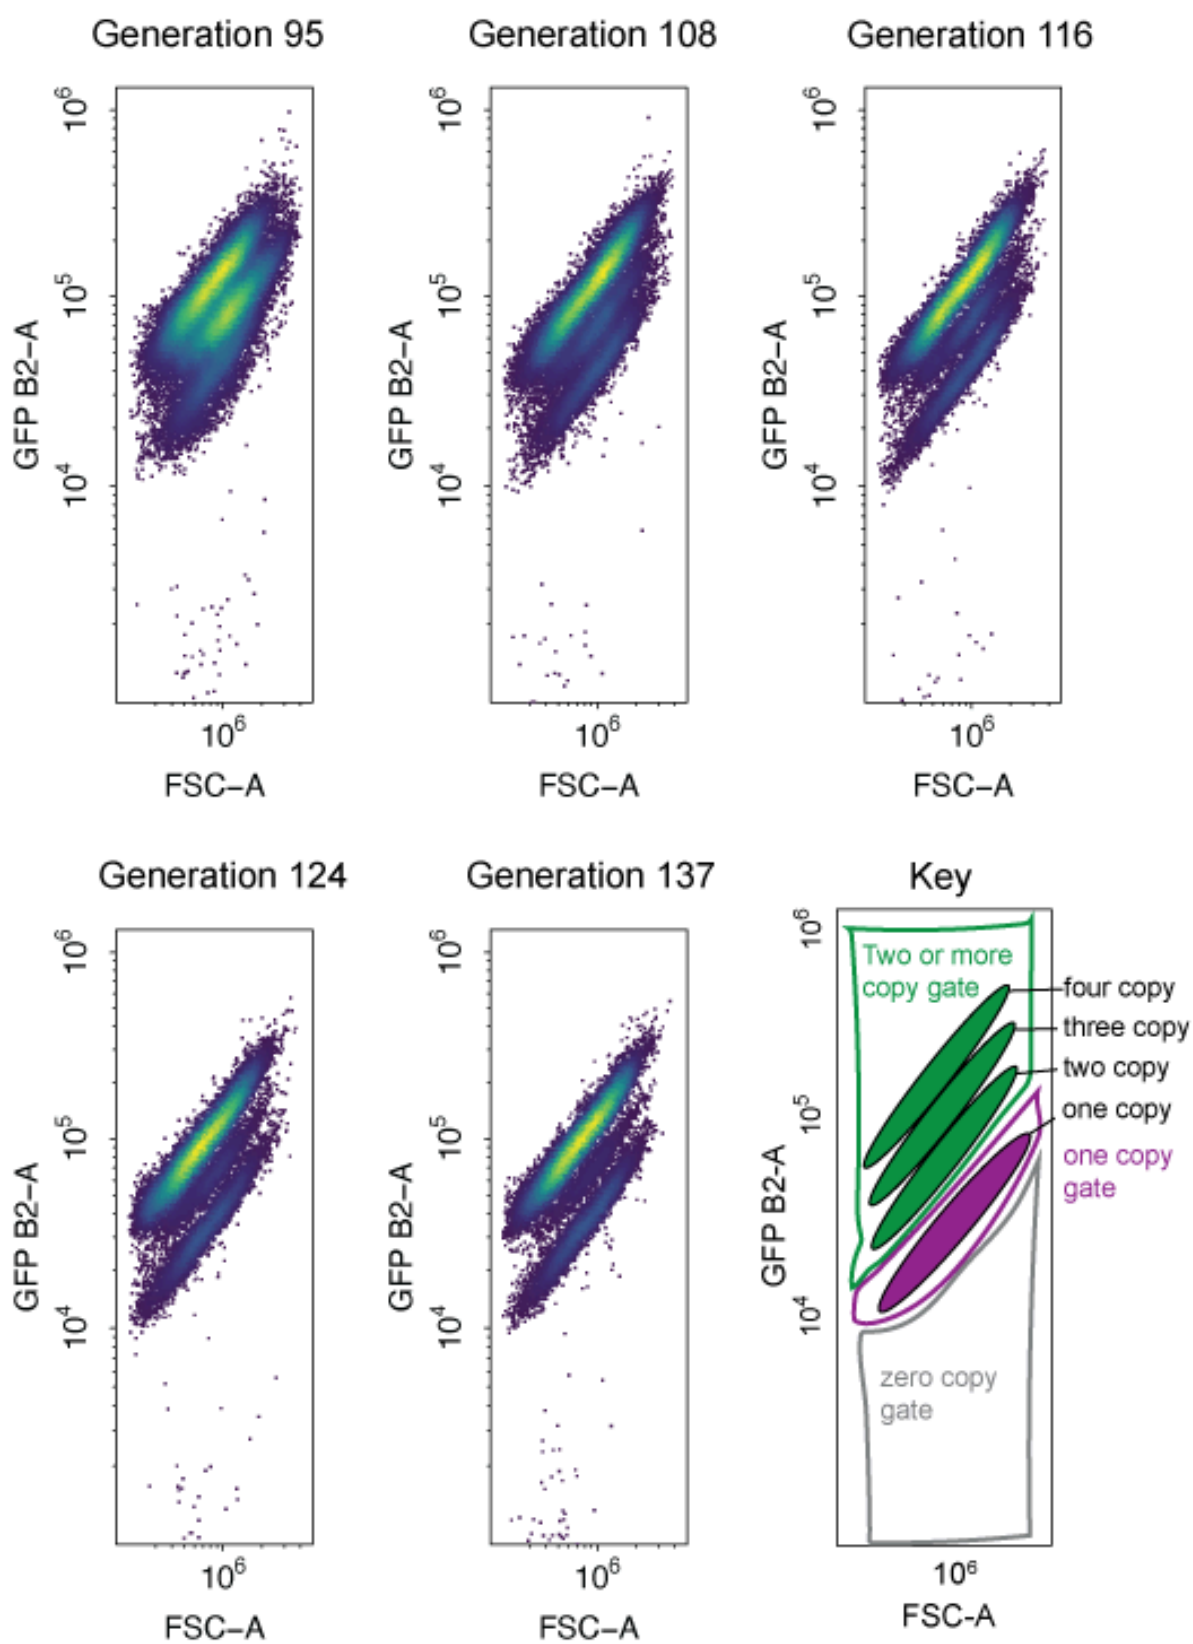

## Wildtype population 5

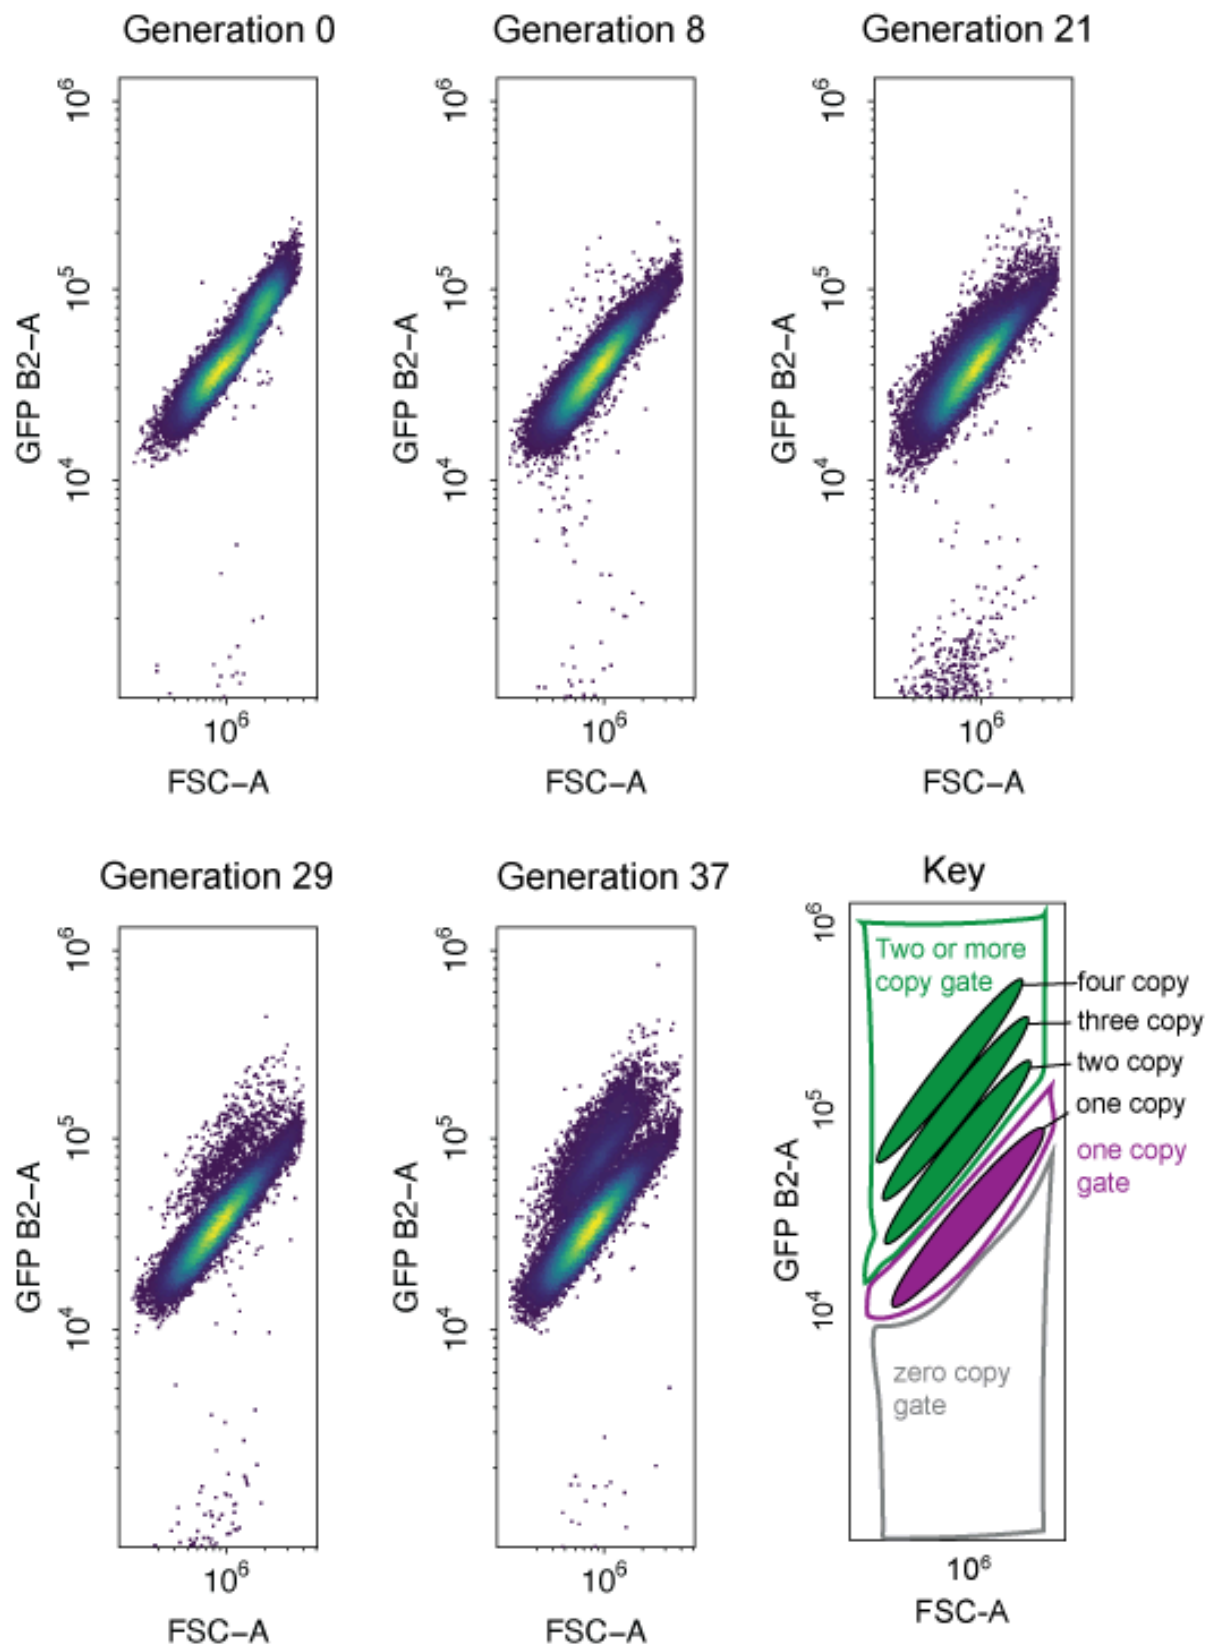



## Wildtype population 5

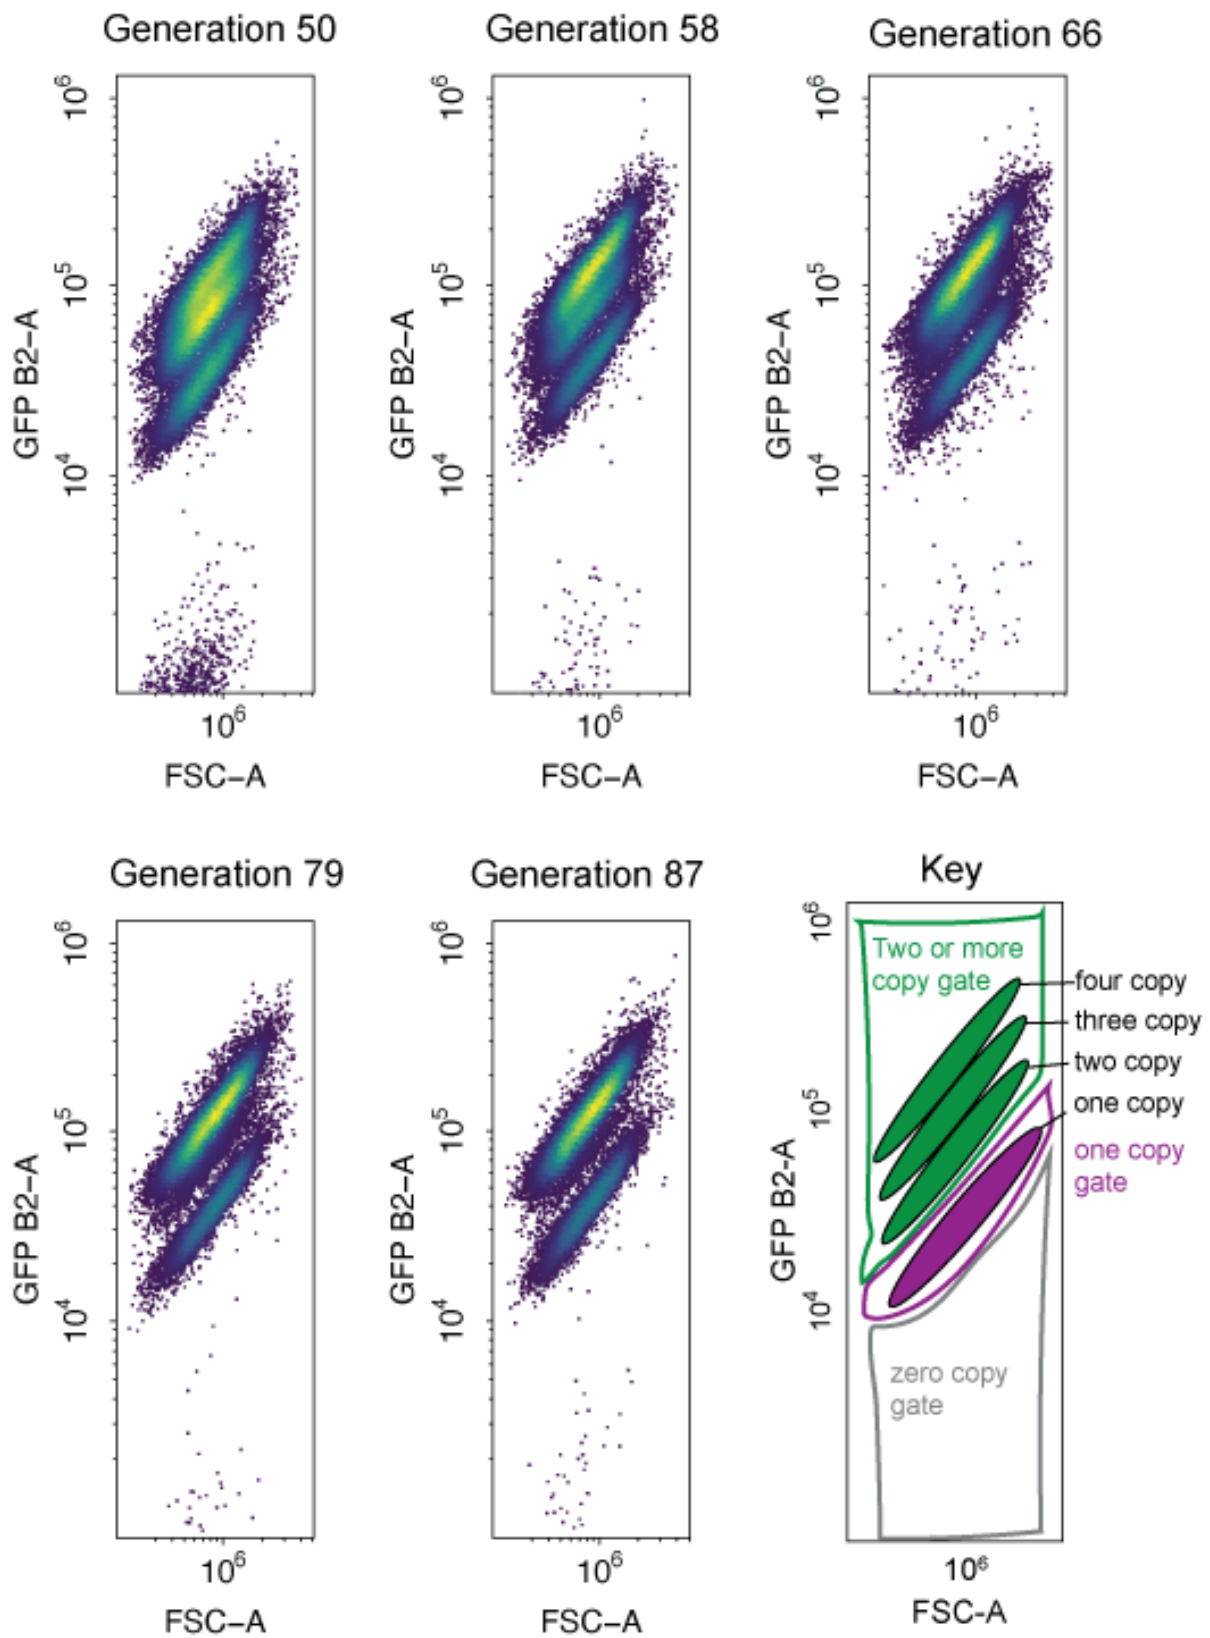

## Wildtype population 5

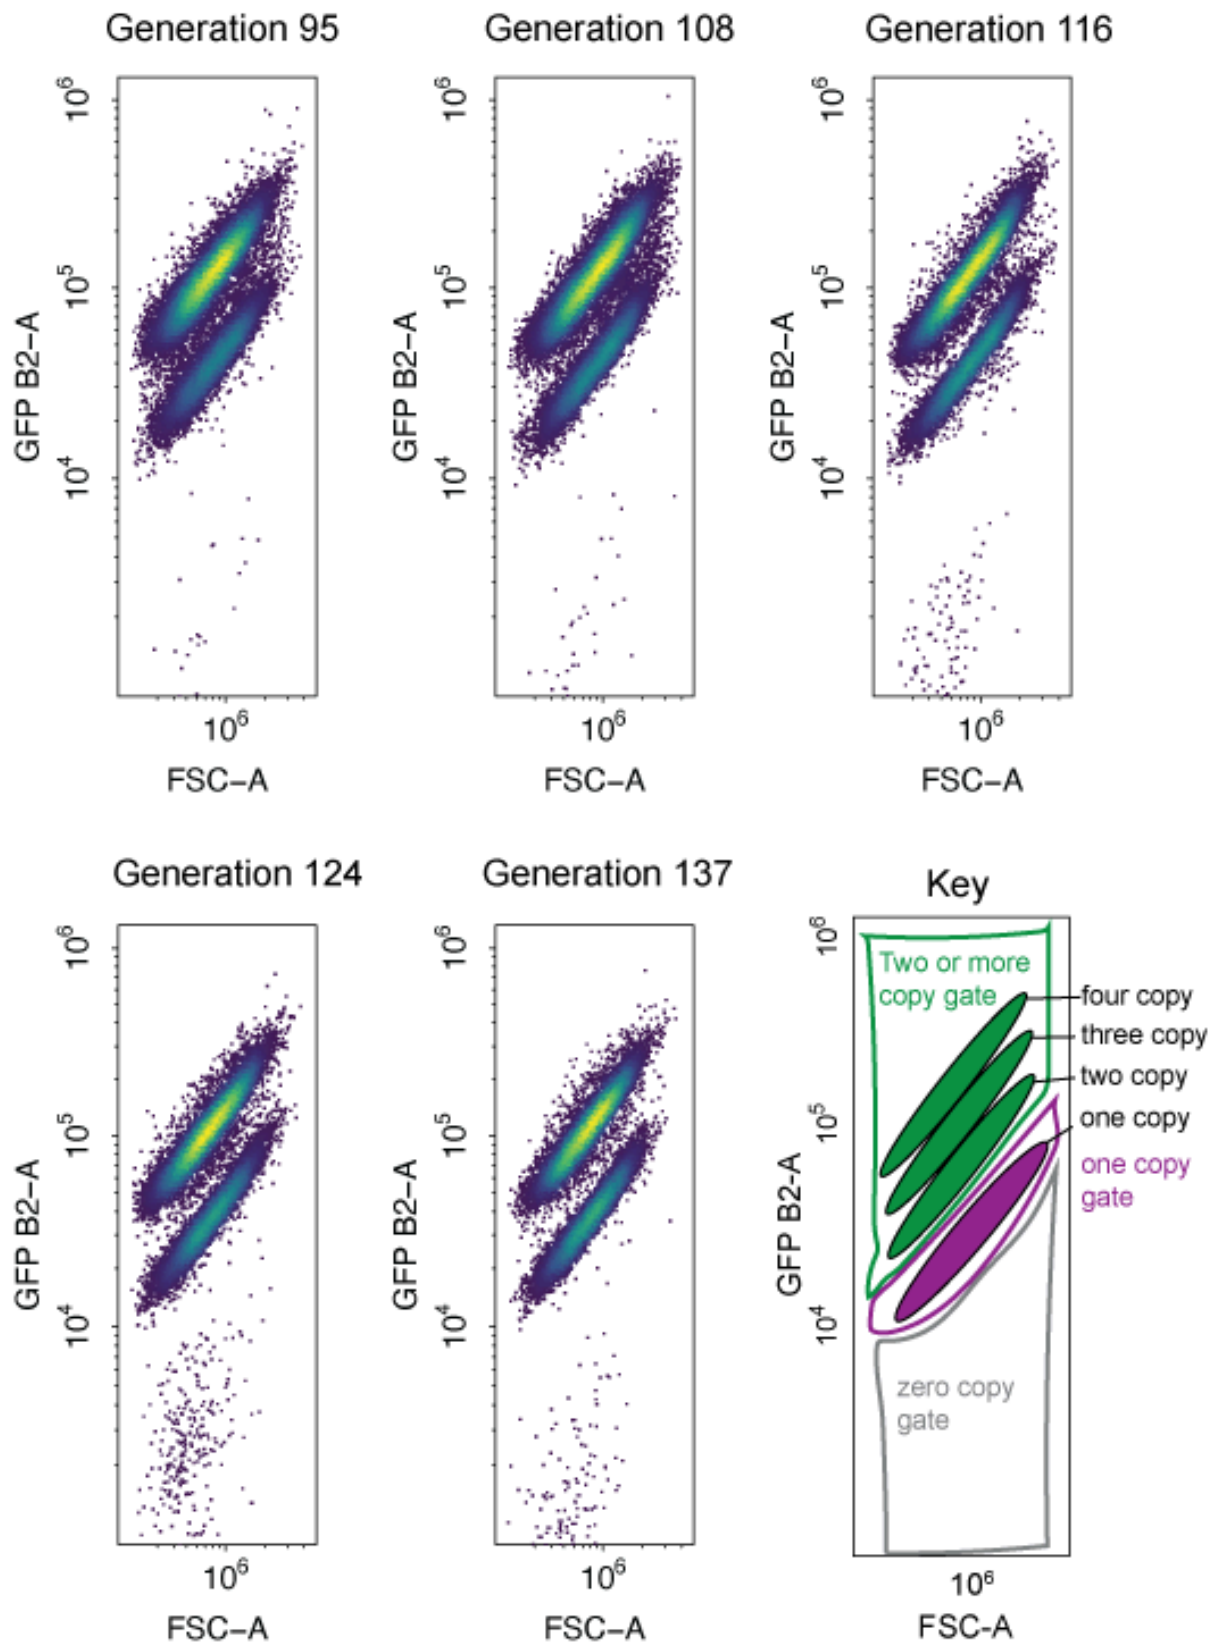

## LTR $\Delta$ population 1

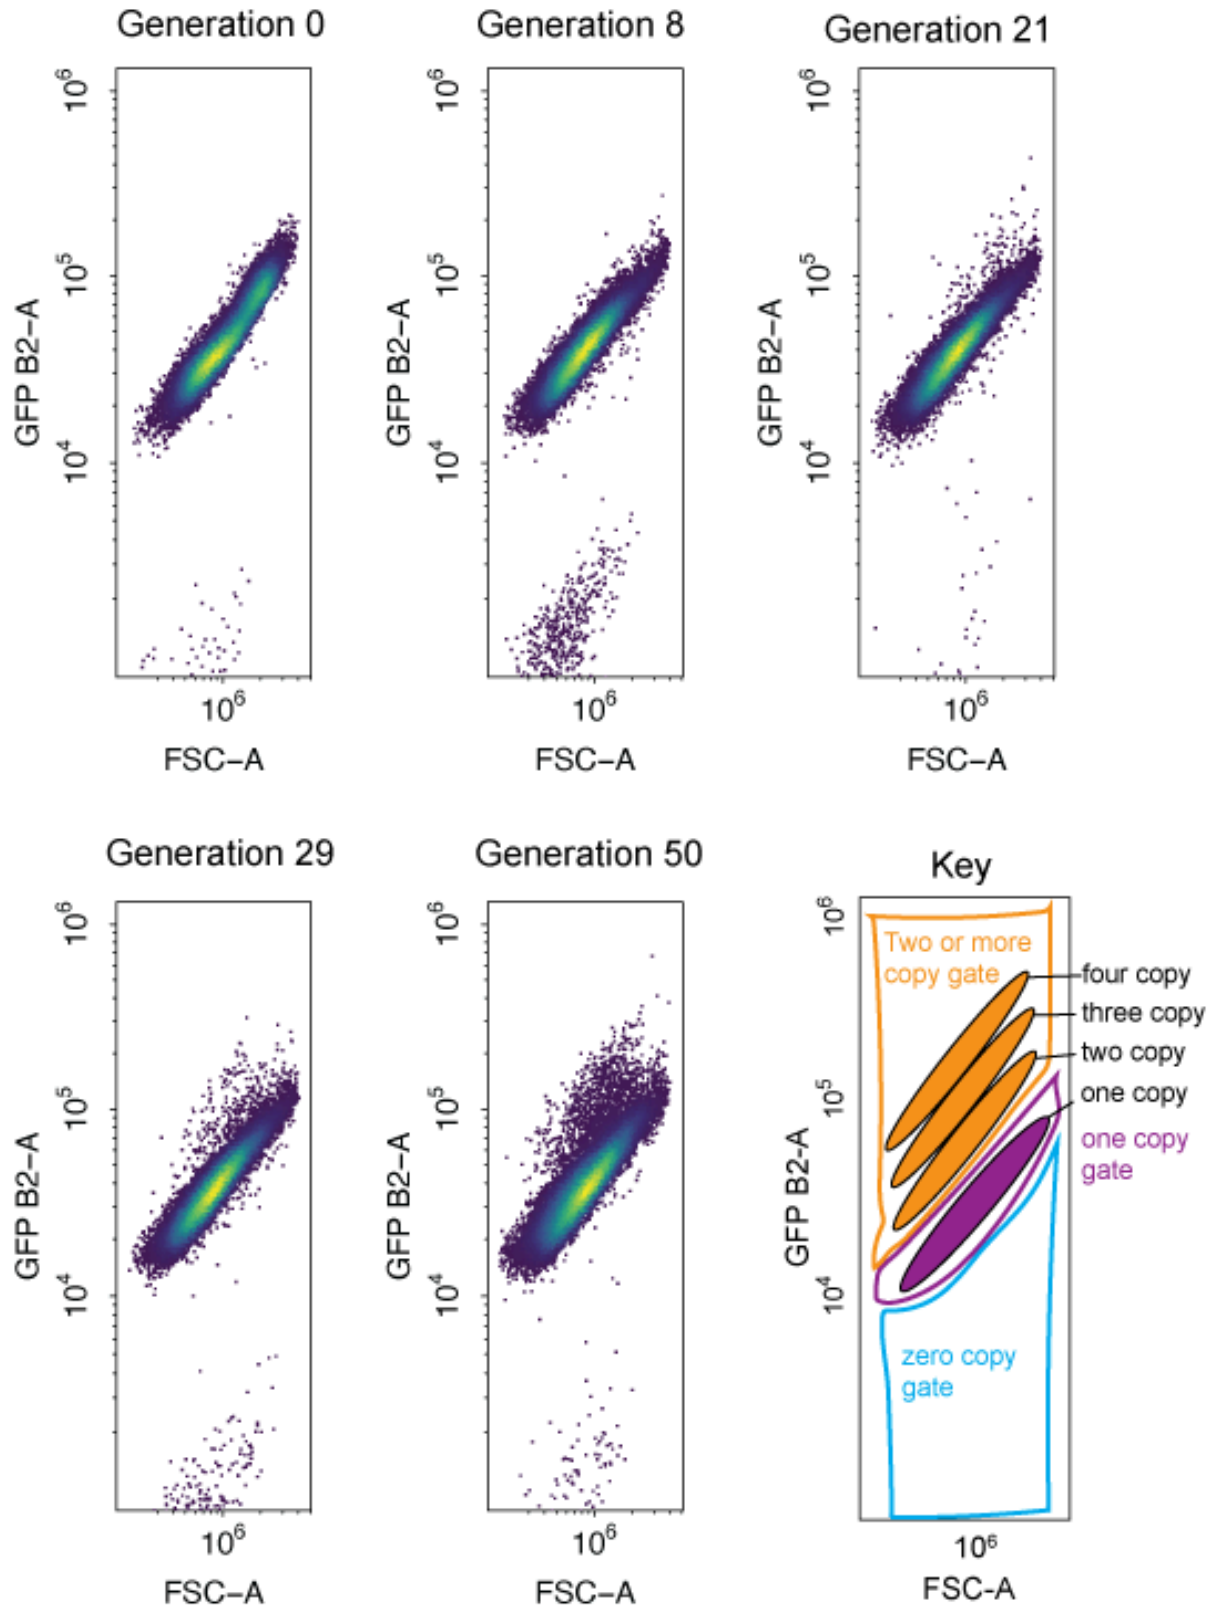

## LTR $\Delta$ population 1

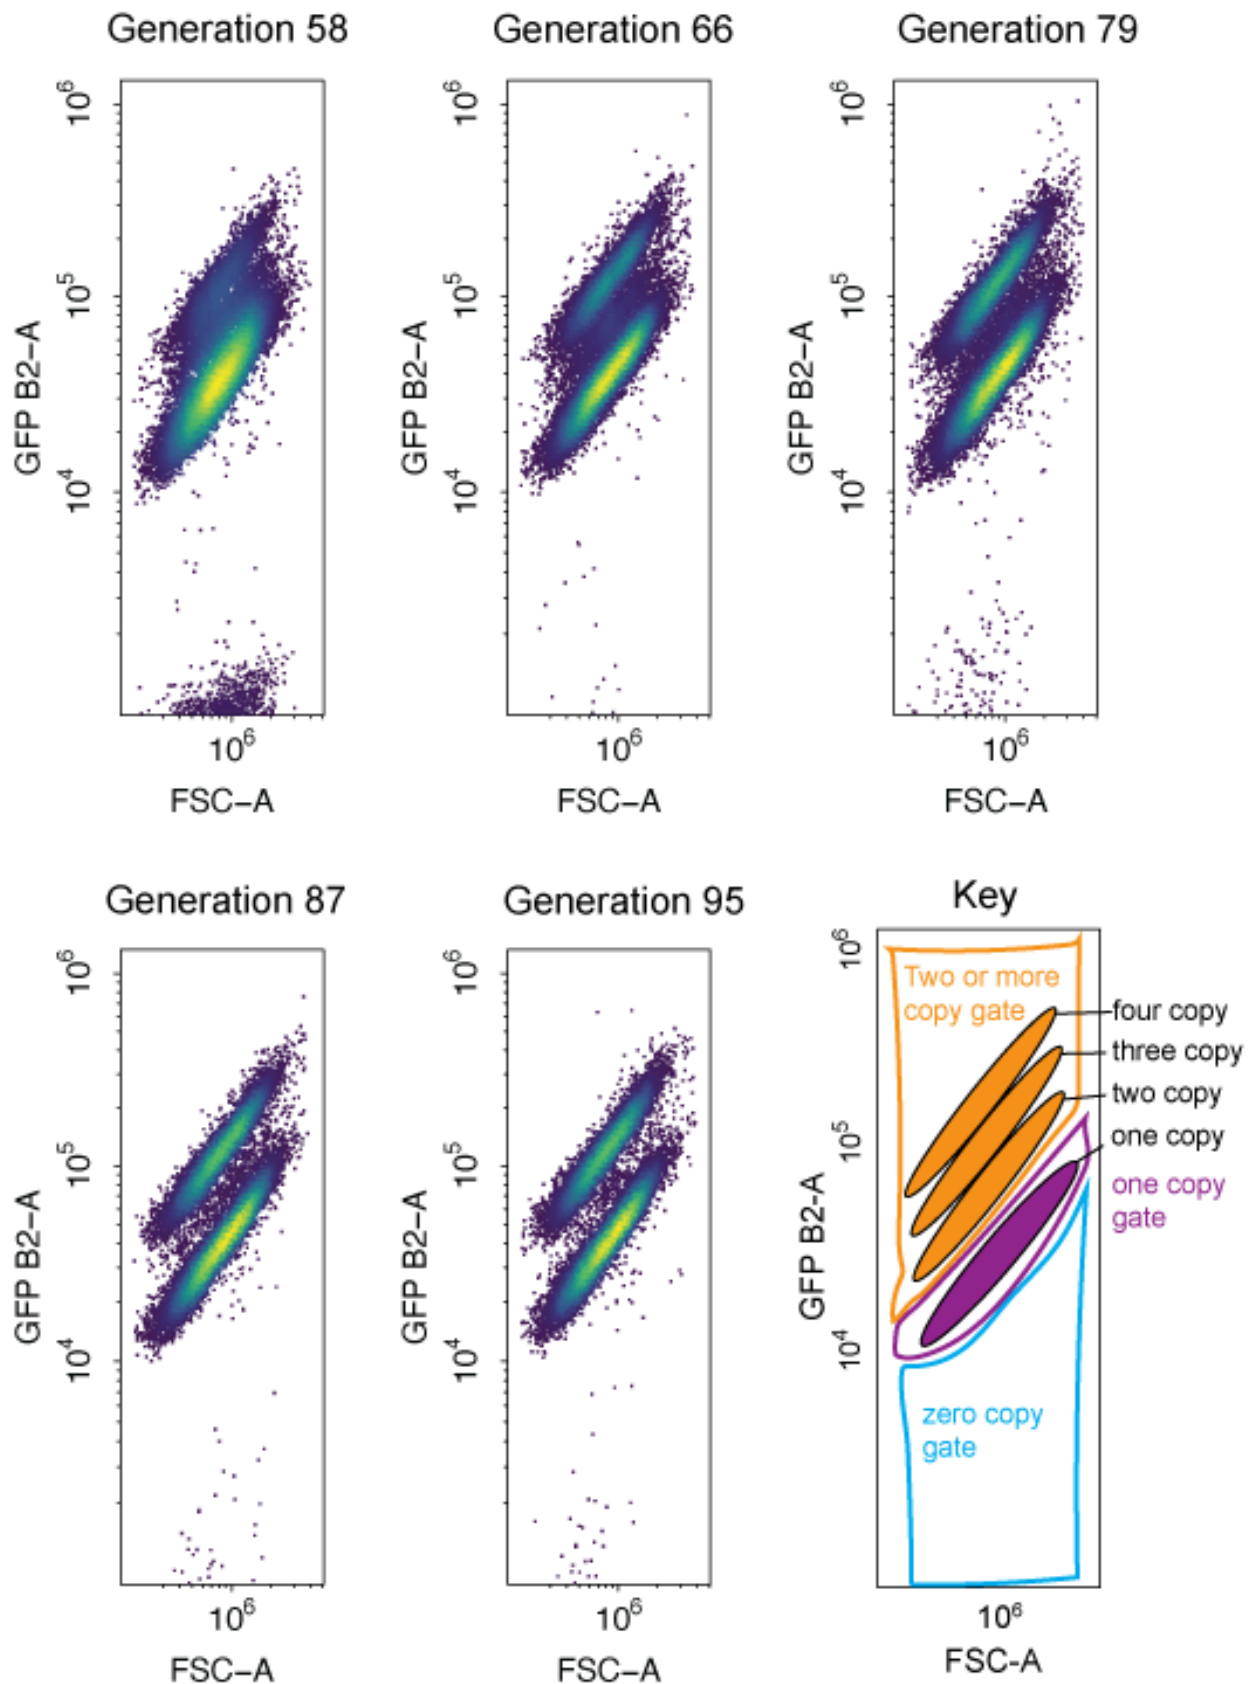

## LTR $\Delta$ population 1

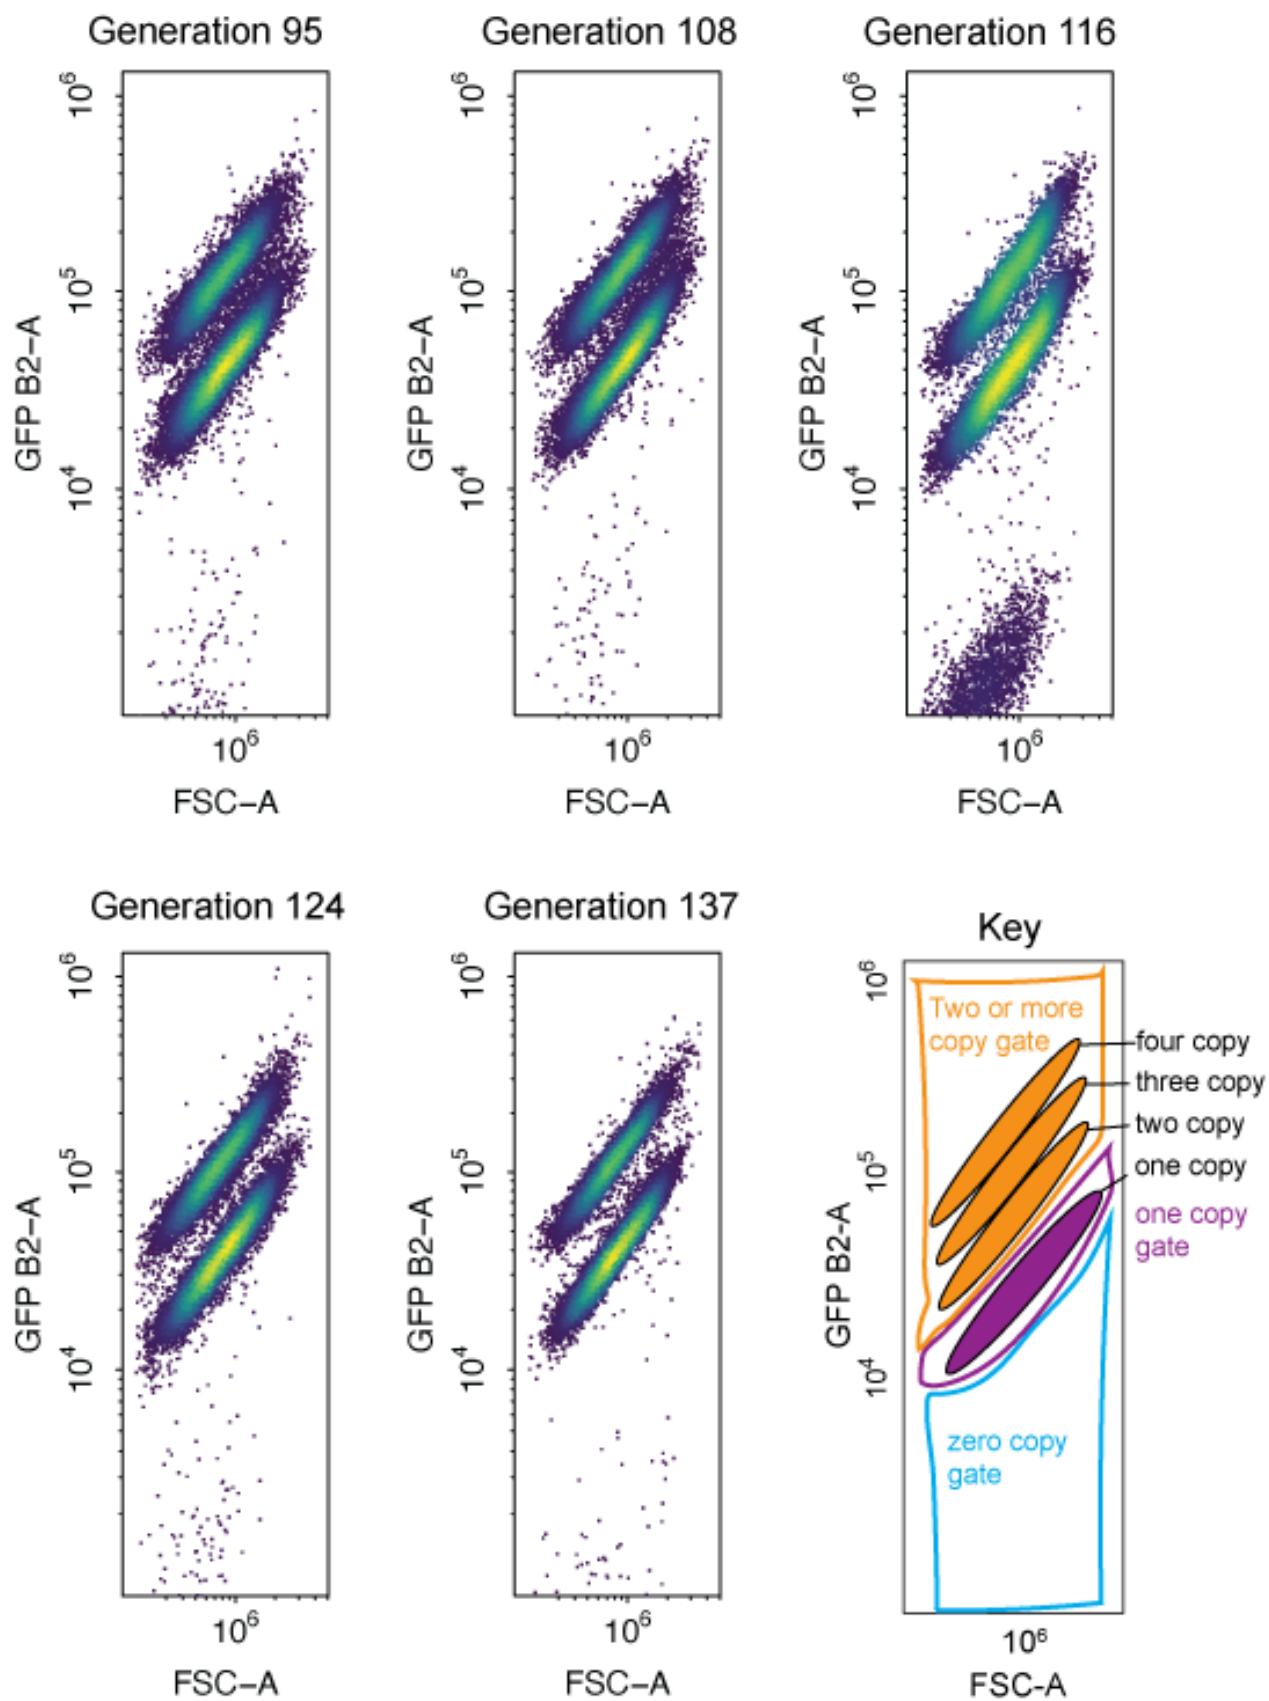

## LTR $\Delta$ population 3

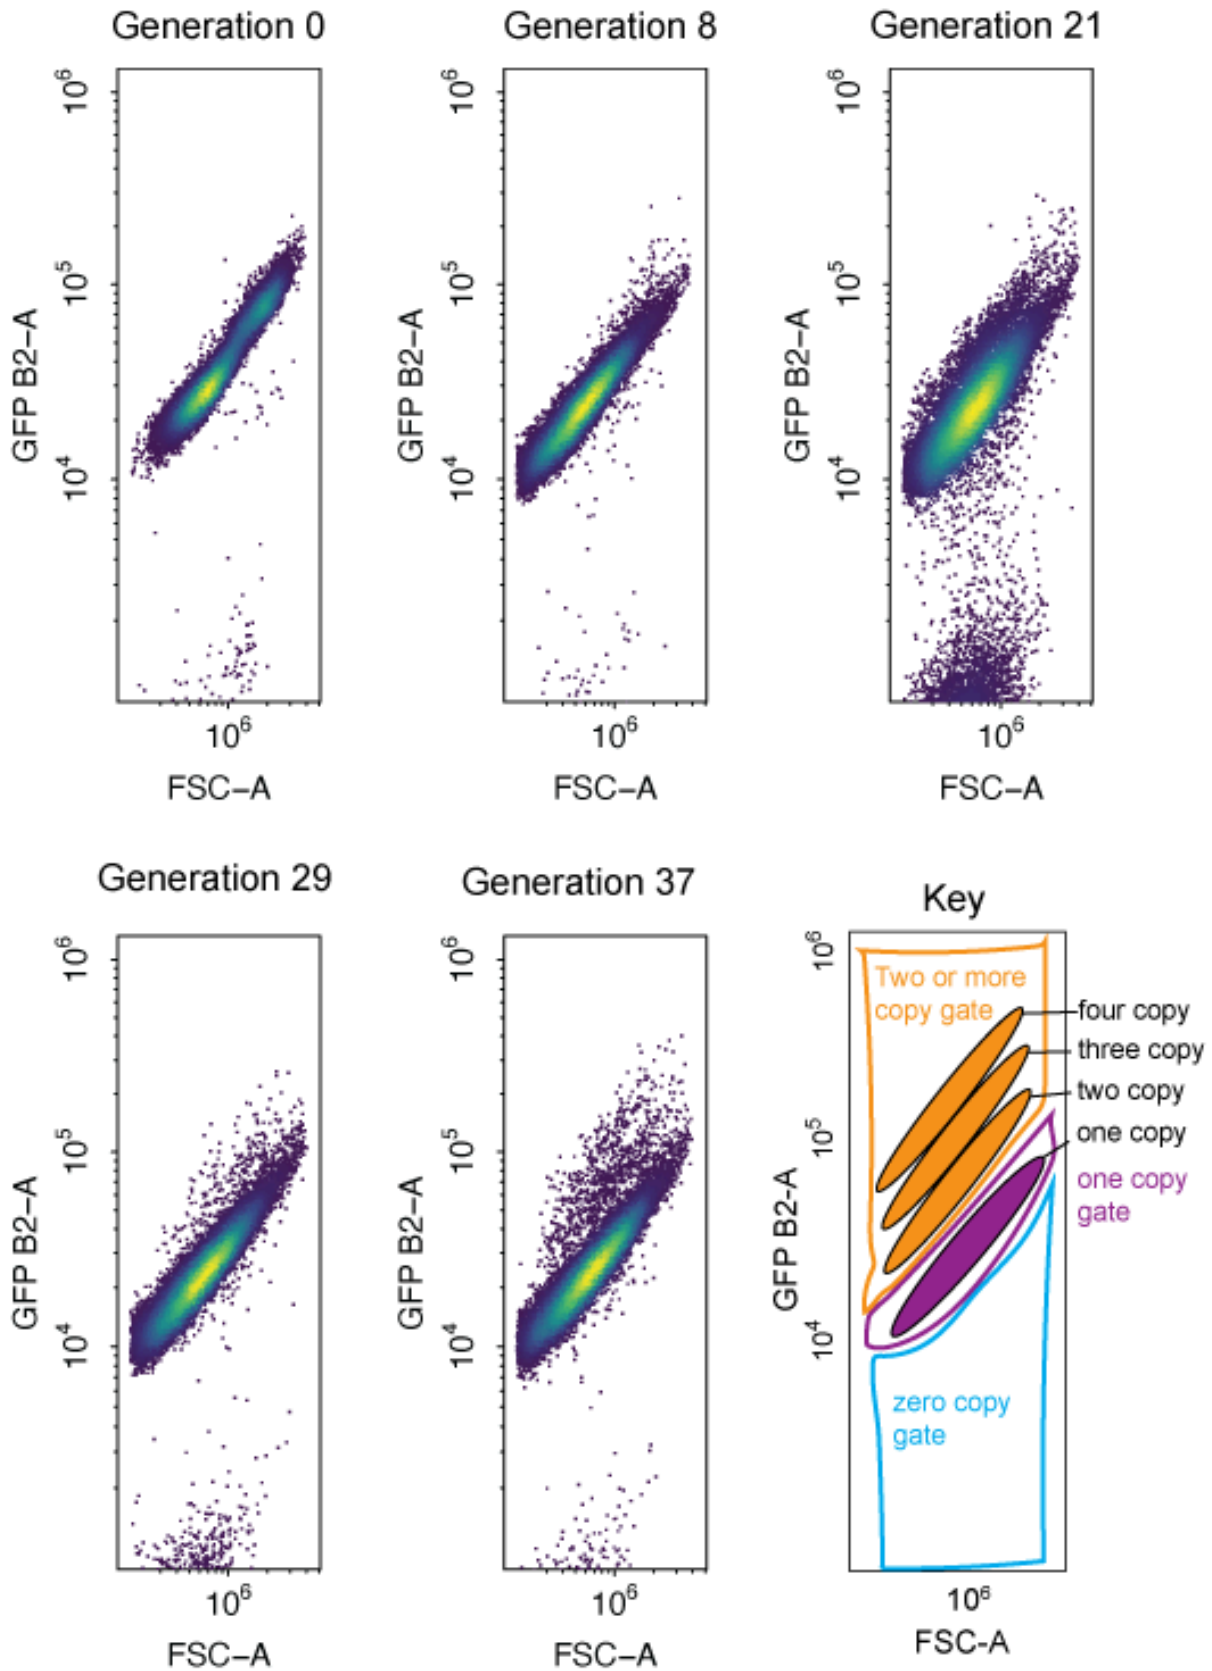

### LTR $\Delta$ population 3

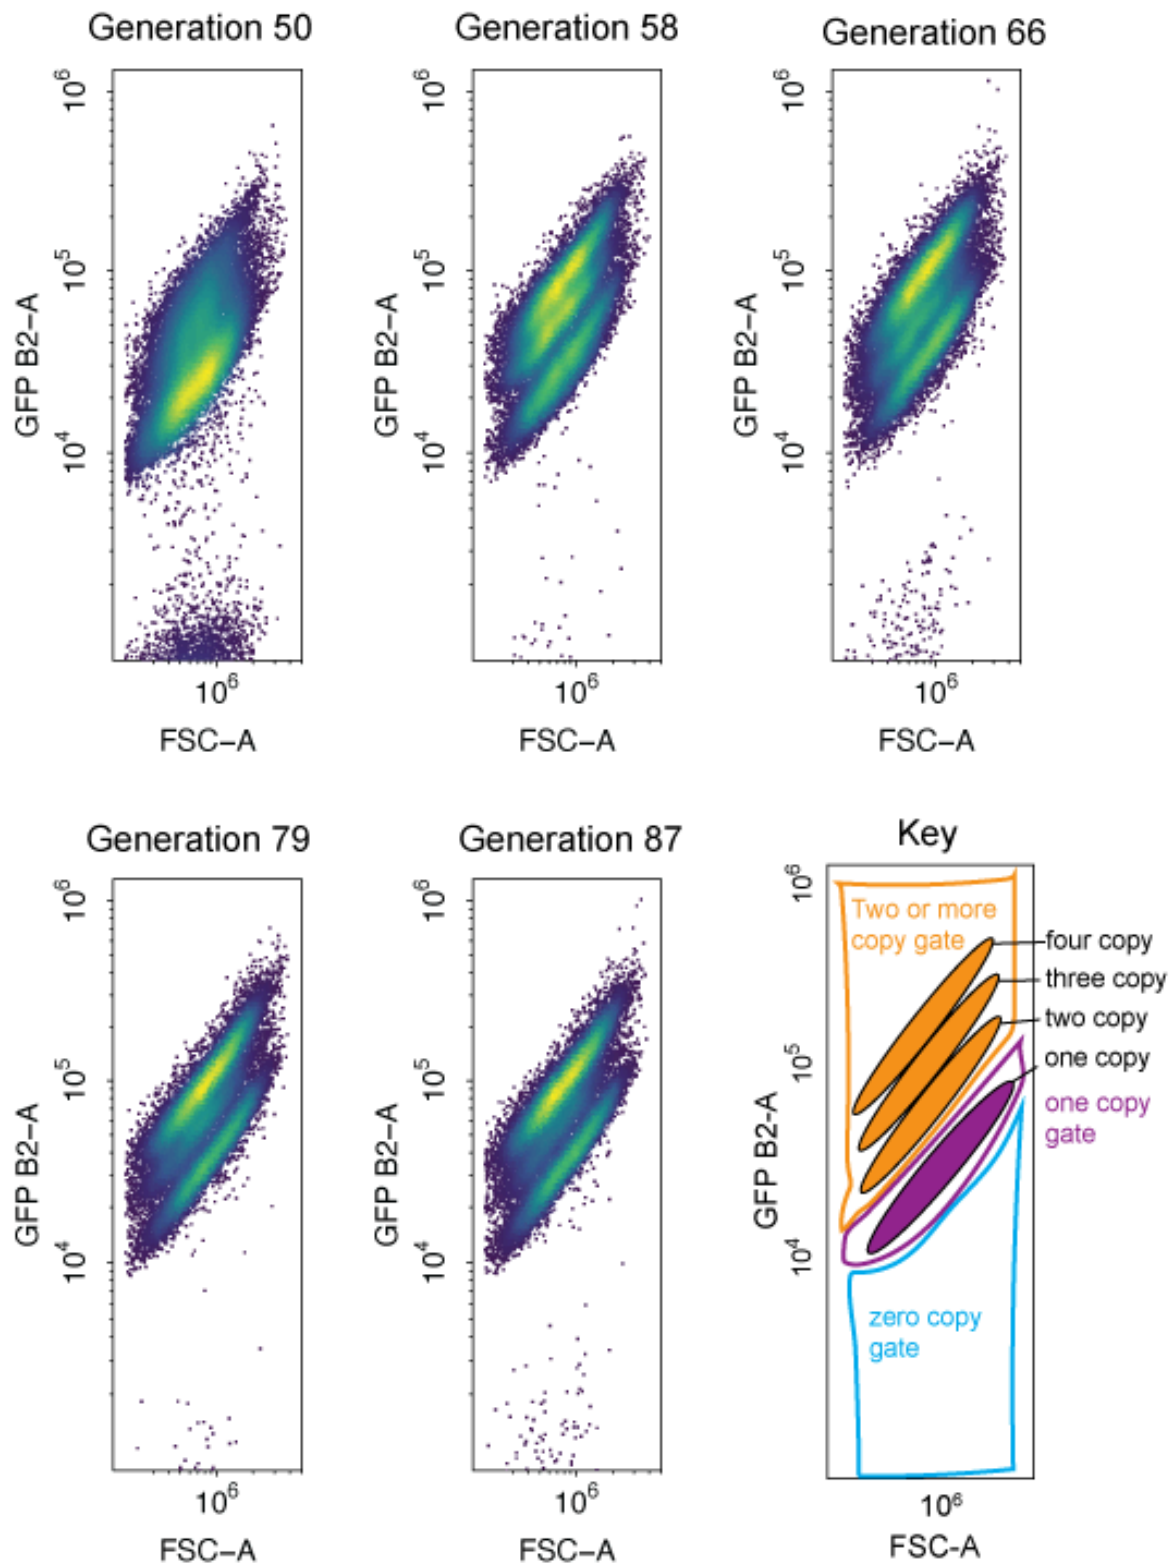

## LTR $\Delta$ population 3

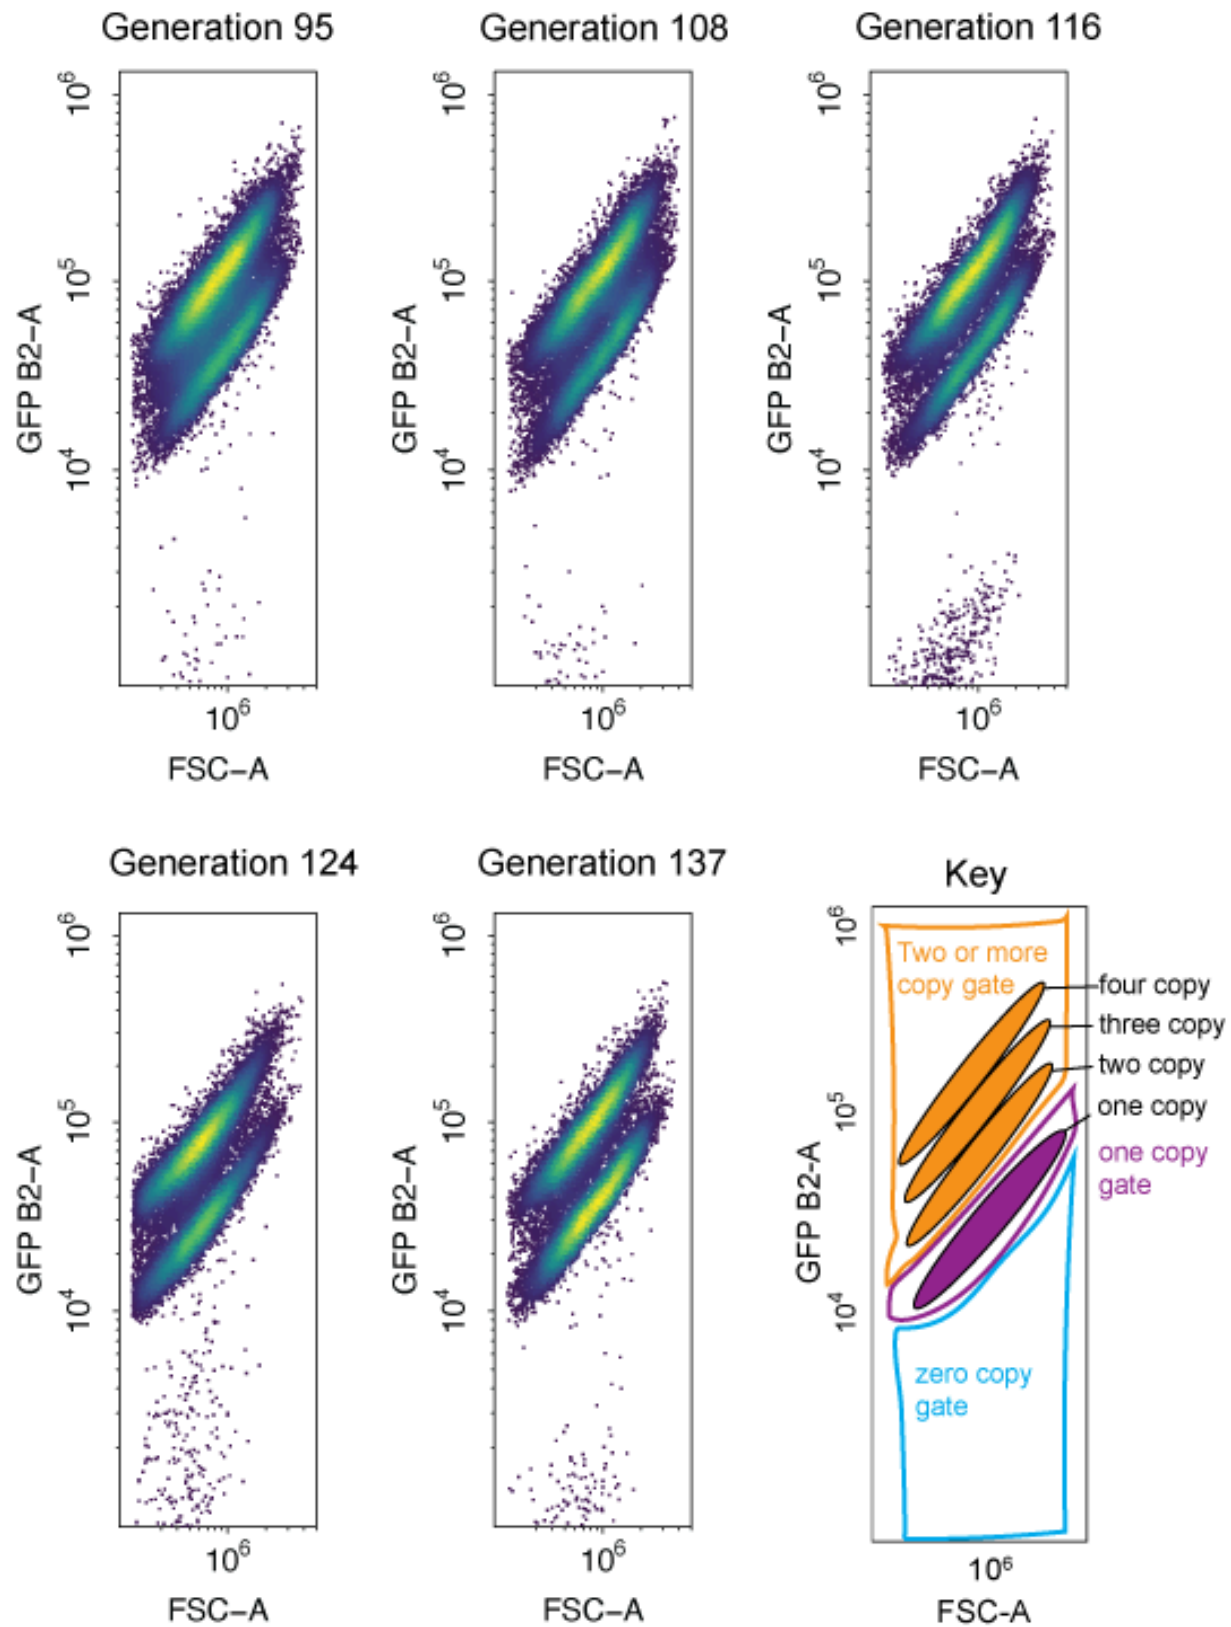



## LTR $\Delta$ population 4

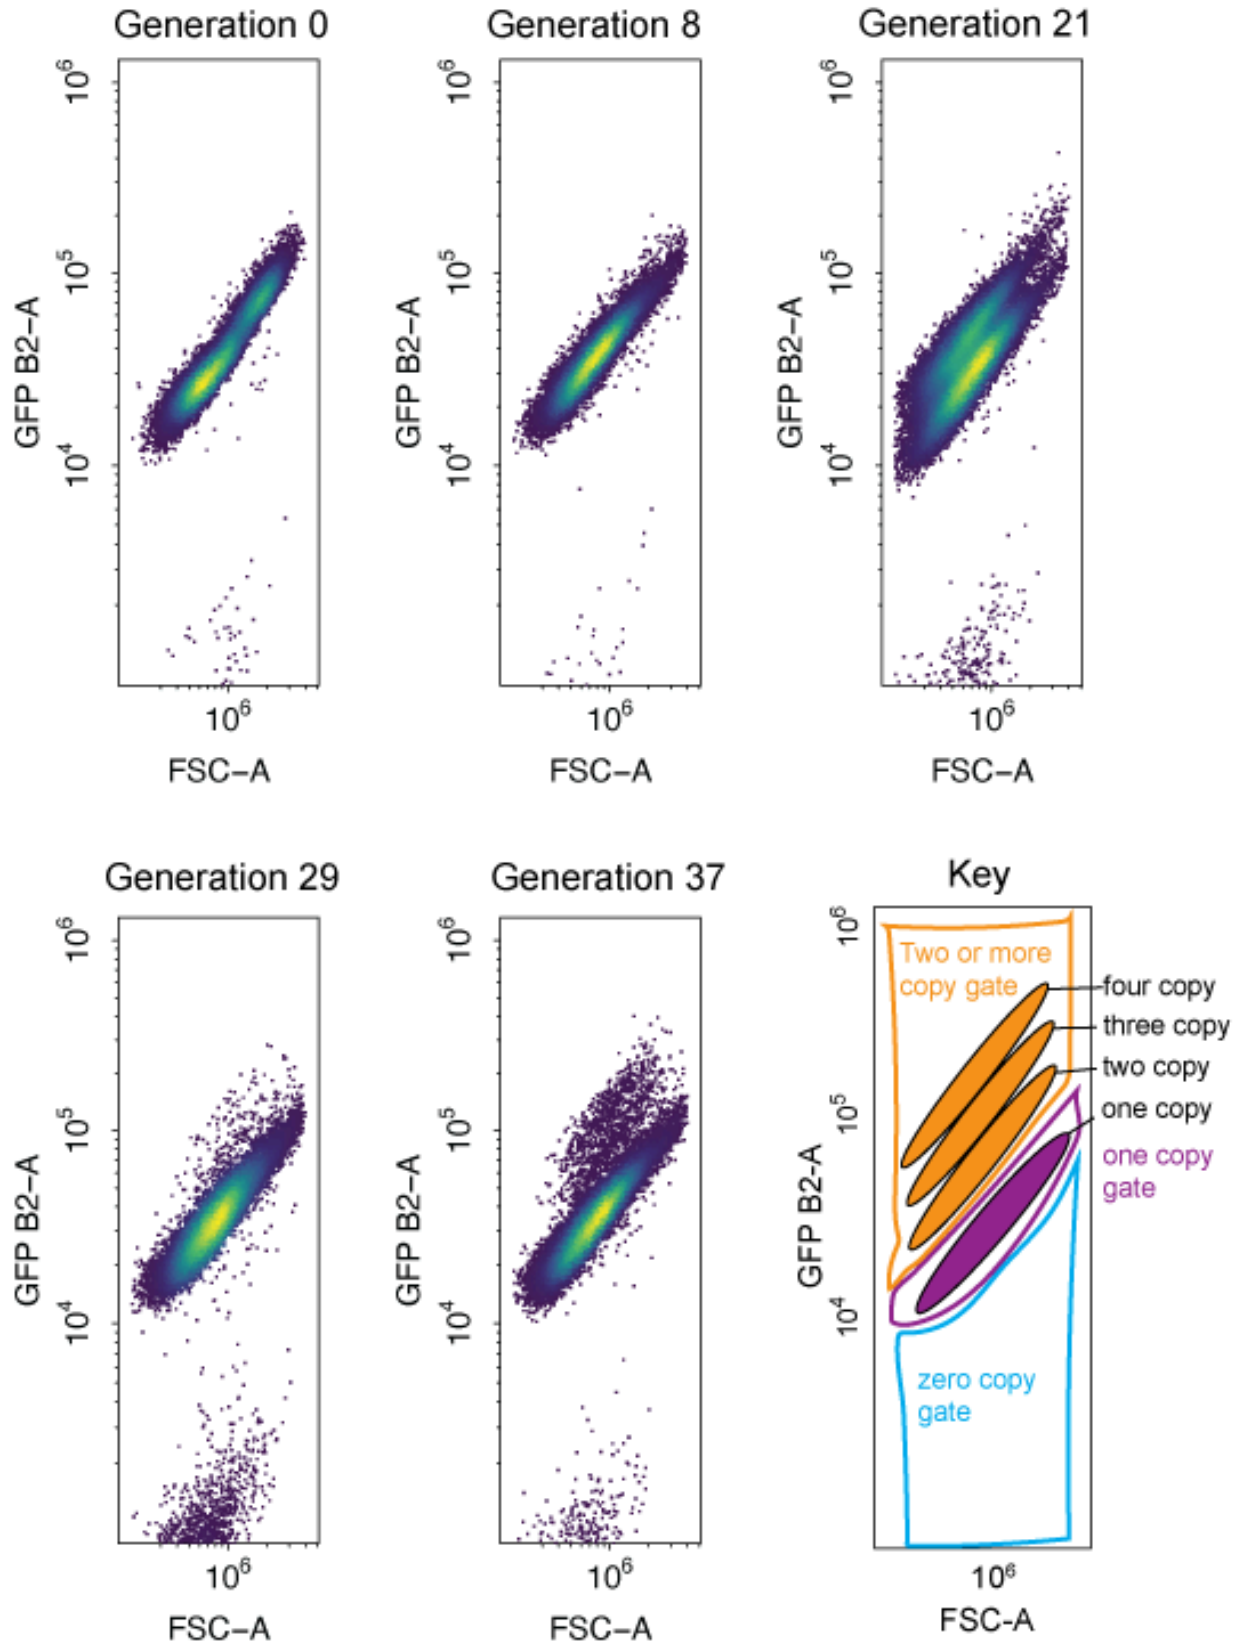

## LTR $\Delta$ population 4

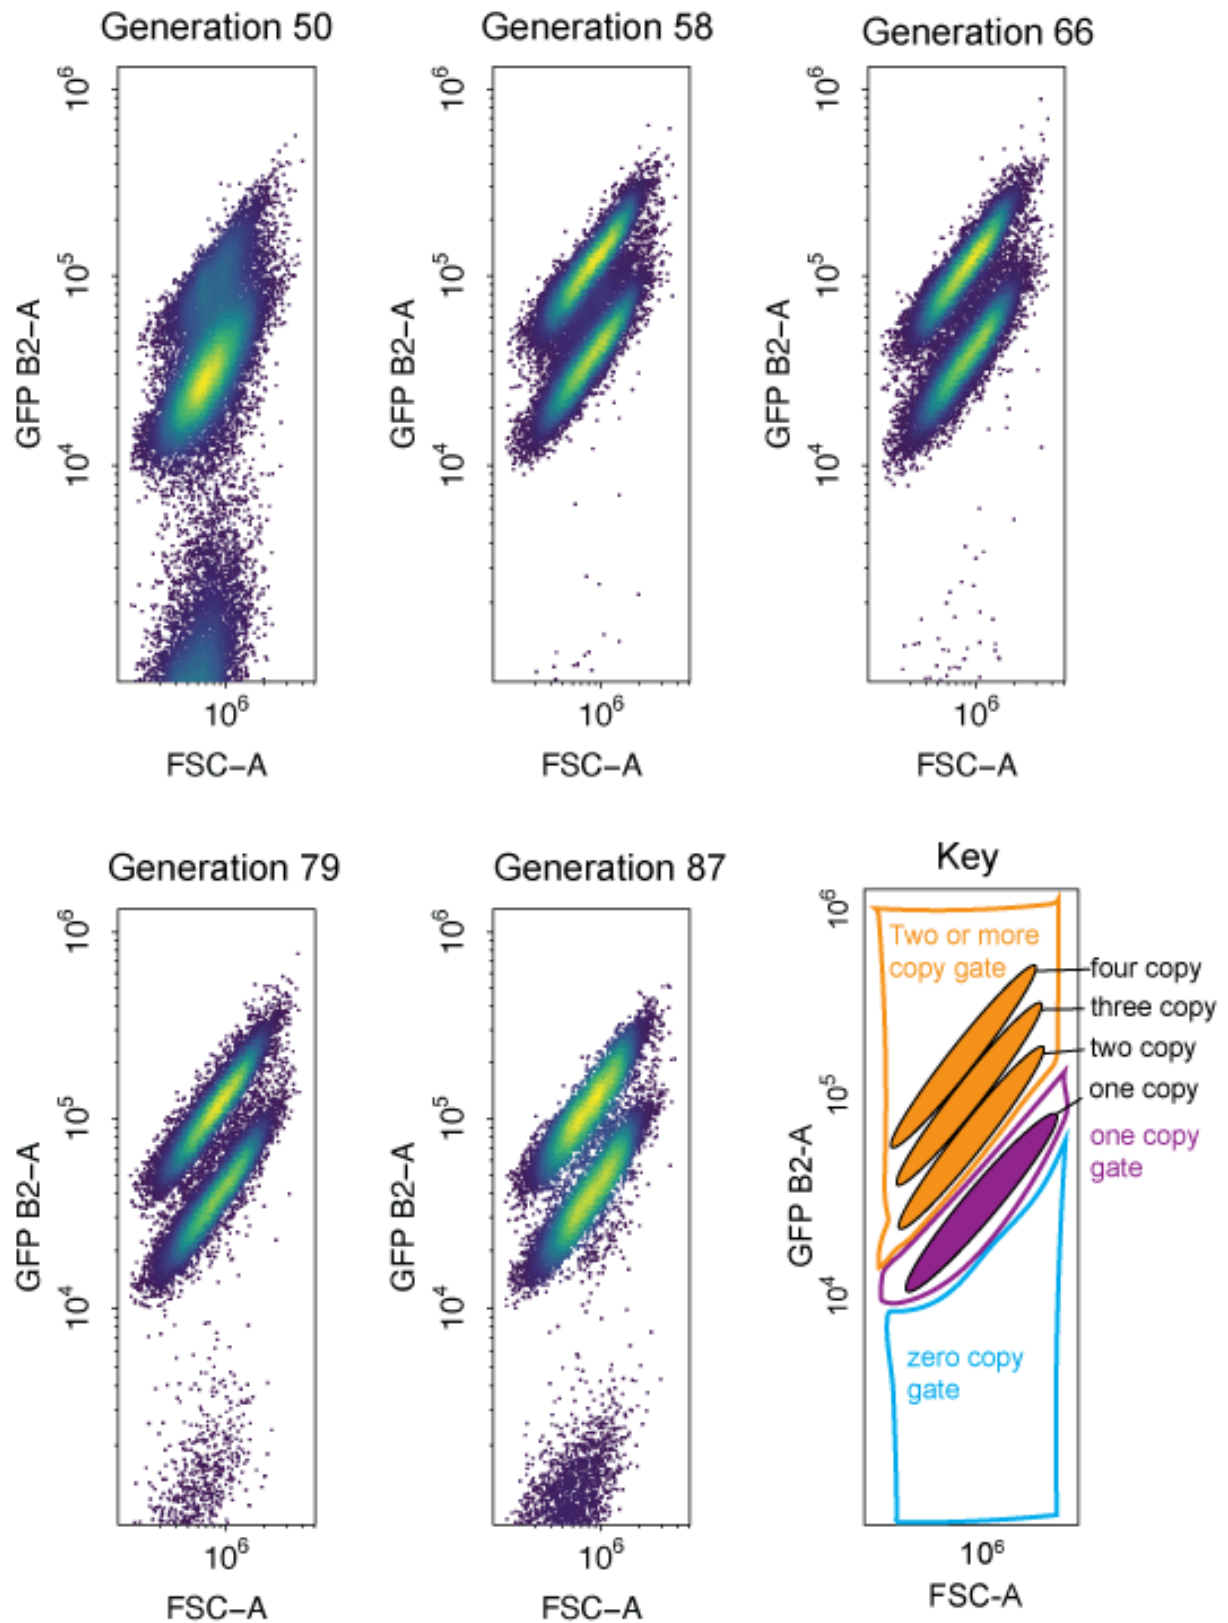

## LTR $\Delta$ population 4

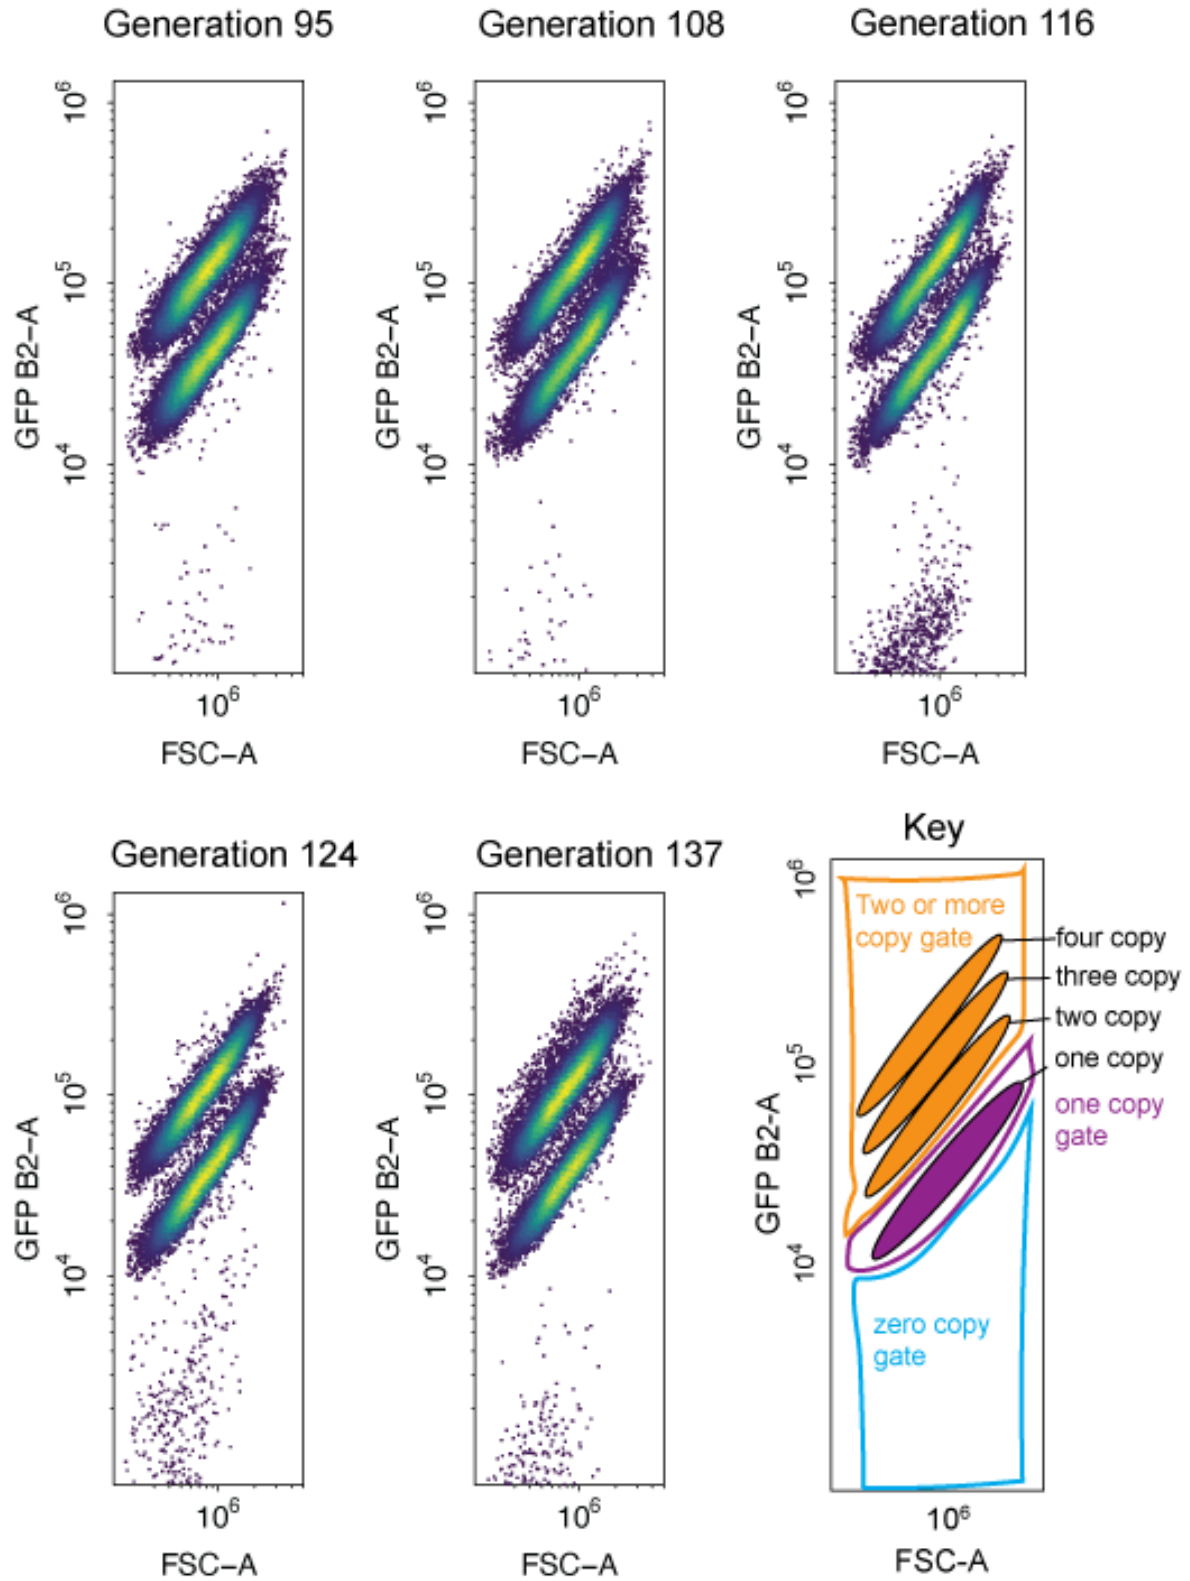

## LTR $\Delta$ population 5

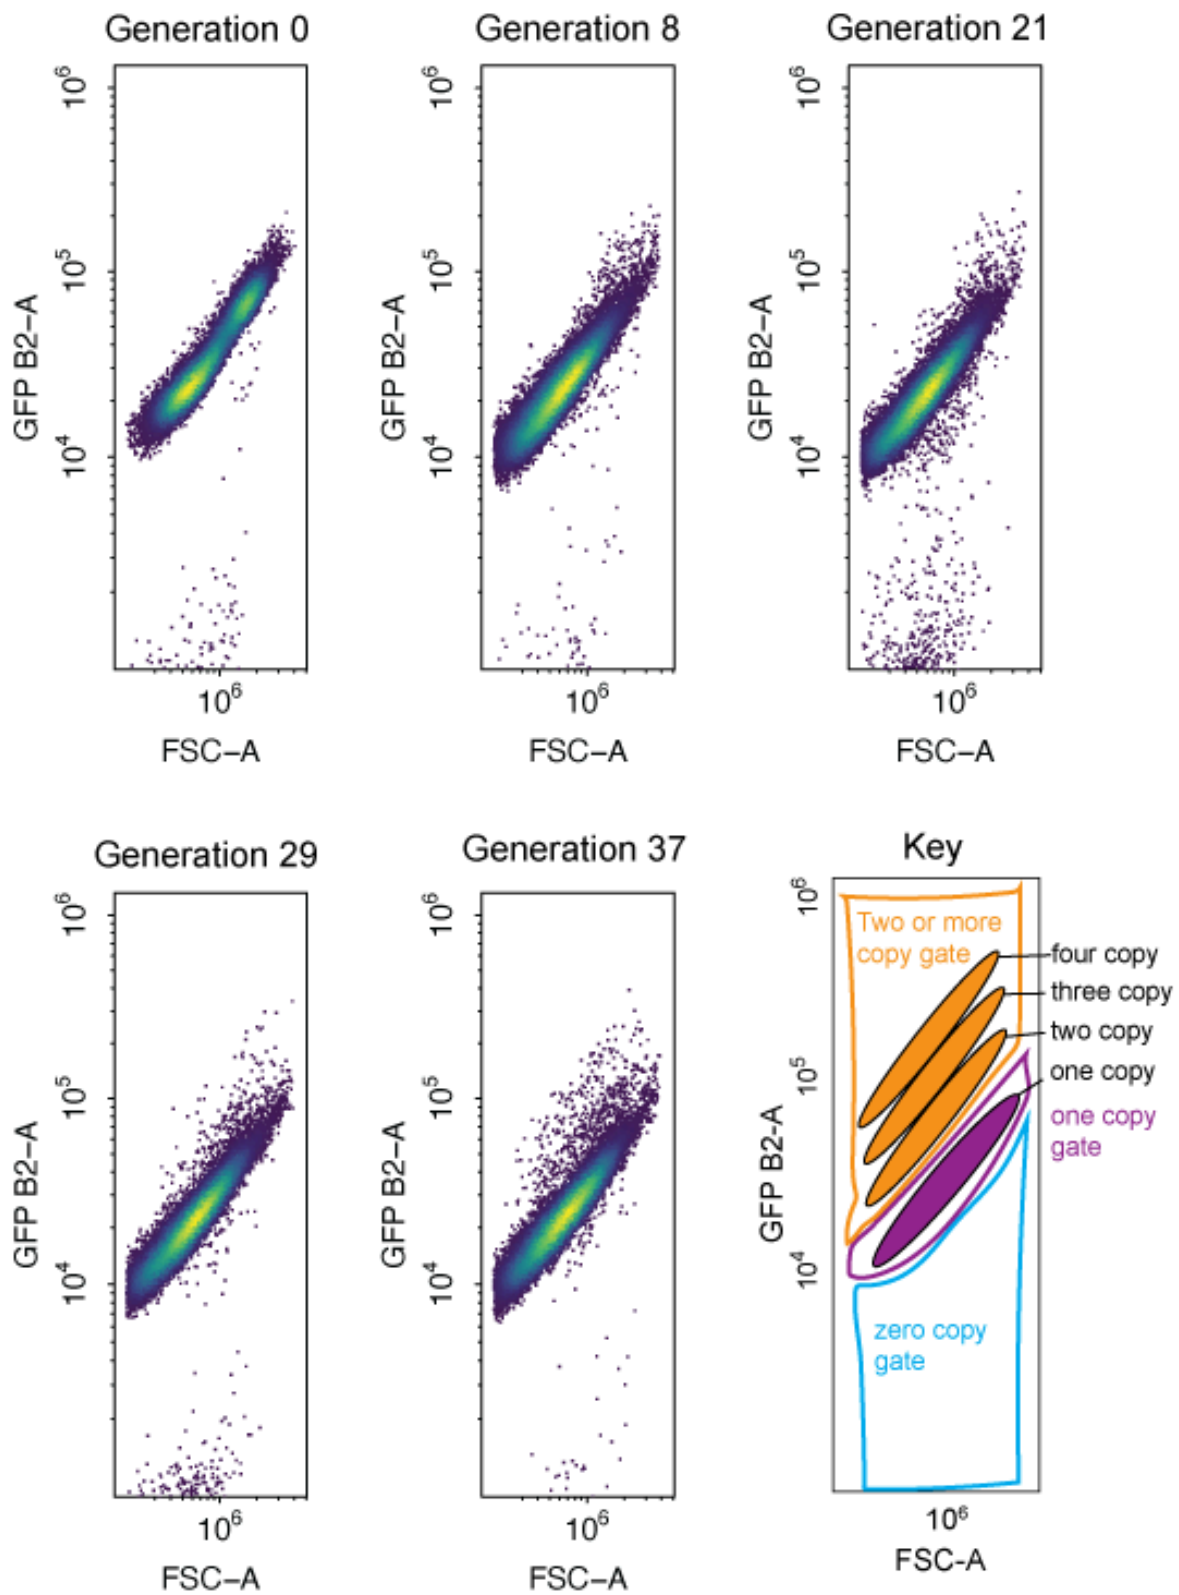

## LTR $\Delta$ population 5

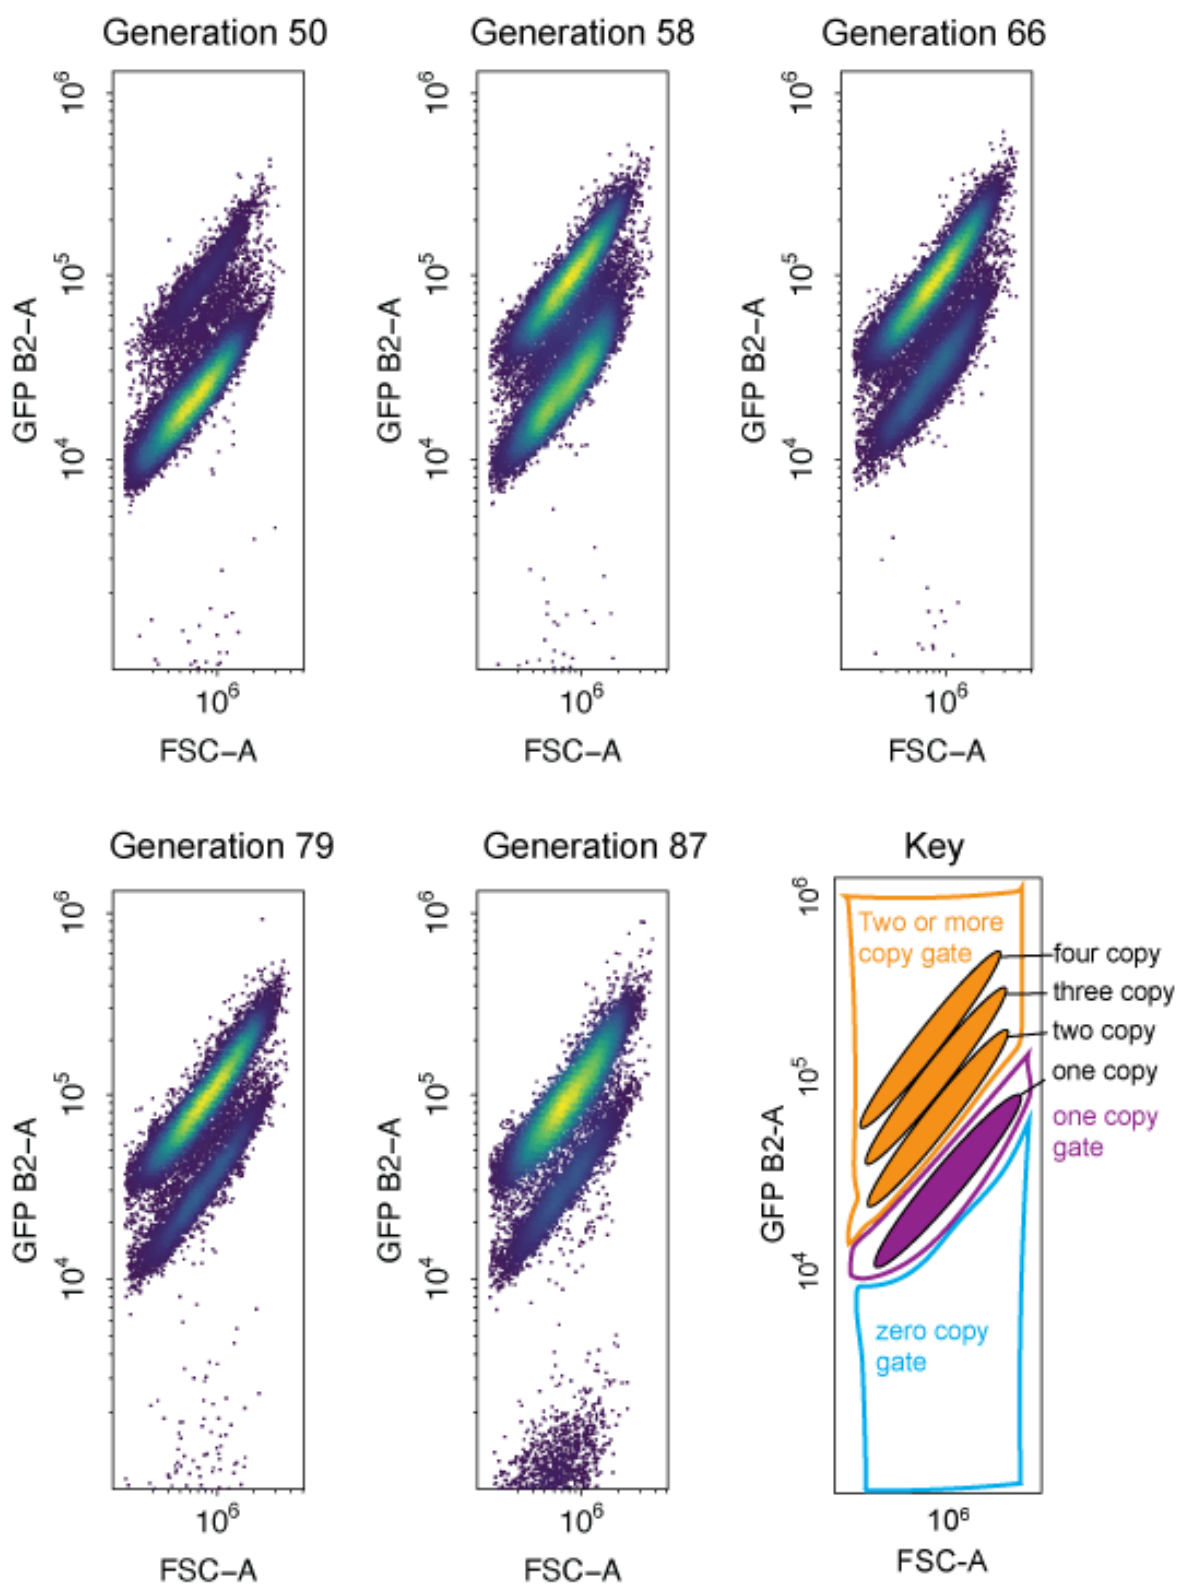

## LTR $\Delta$ population 5

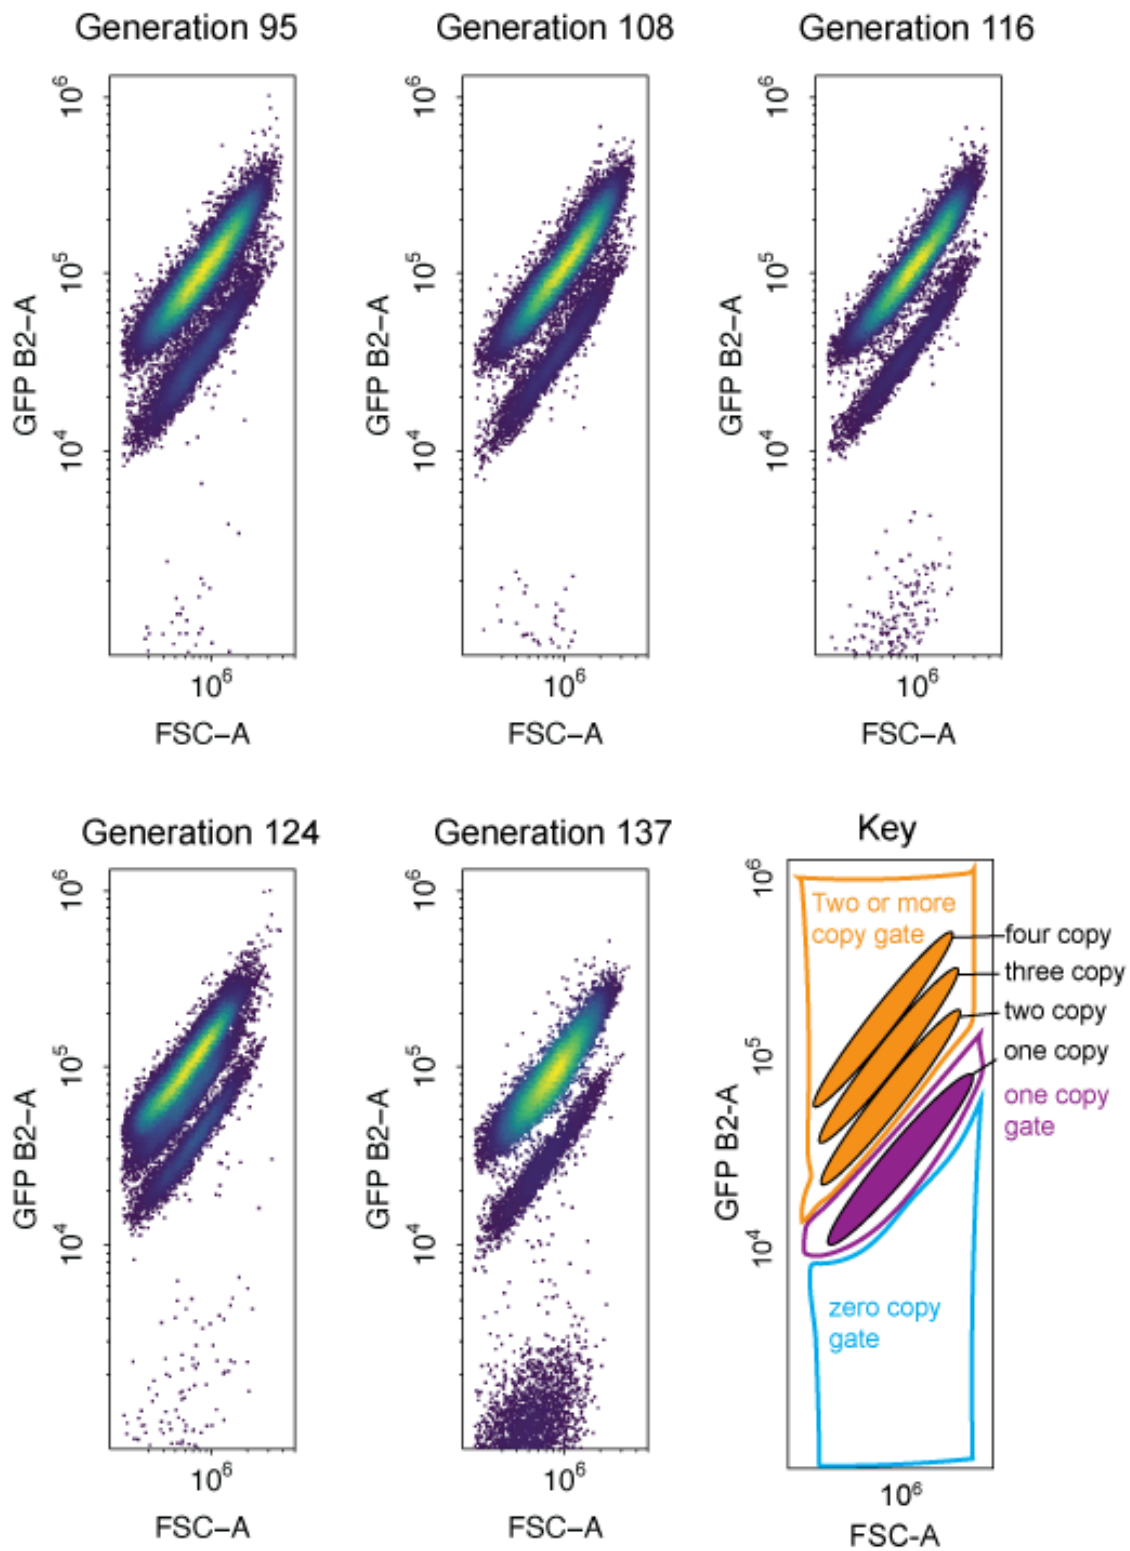

## LTR $\Delta$ population 6

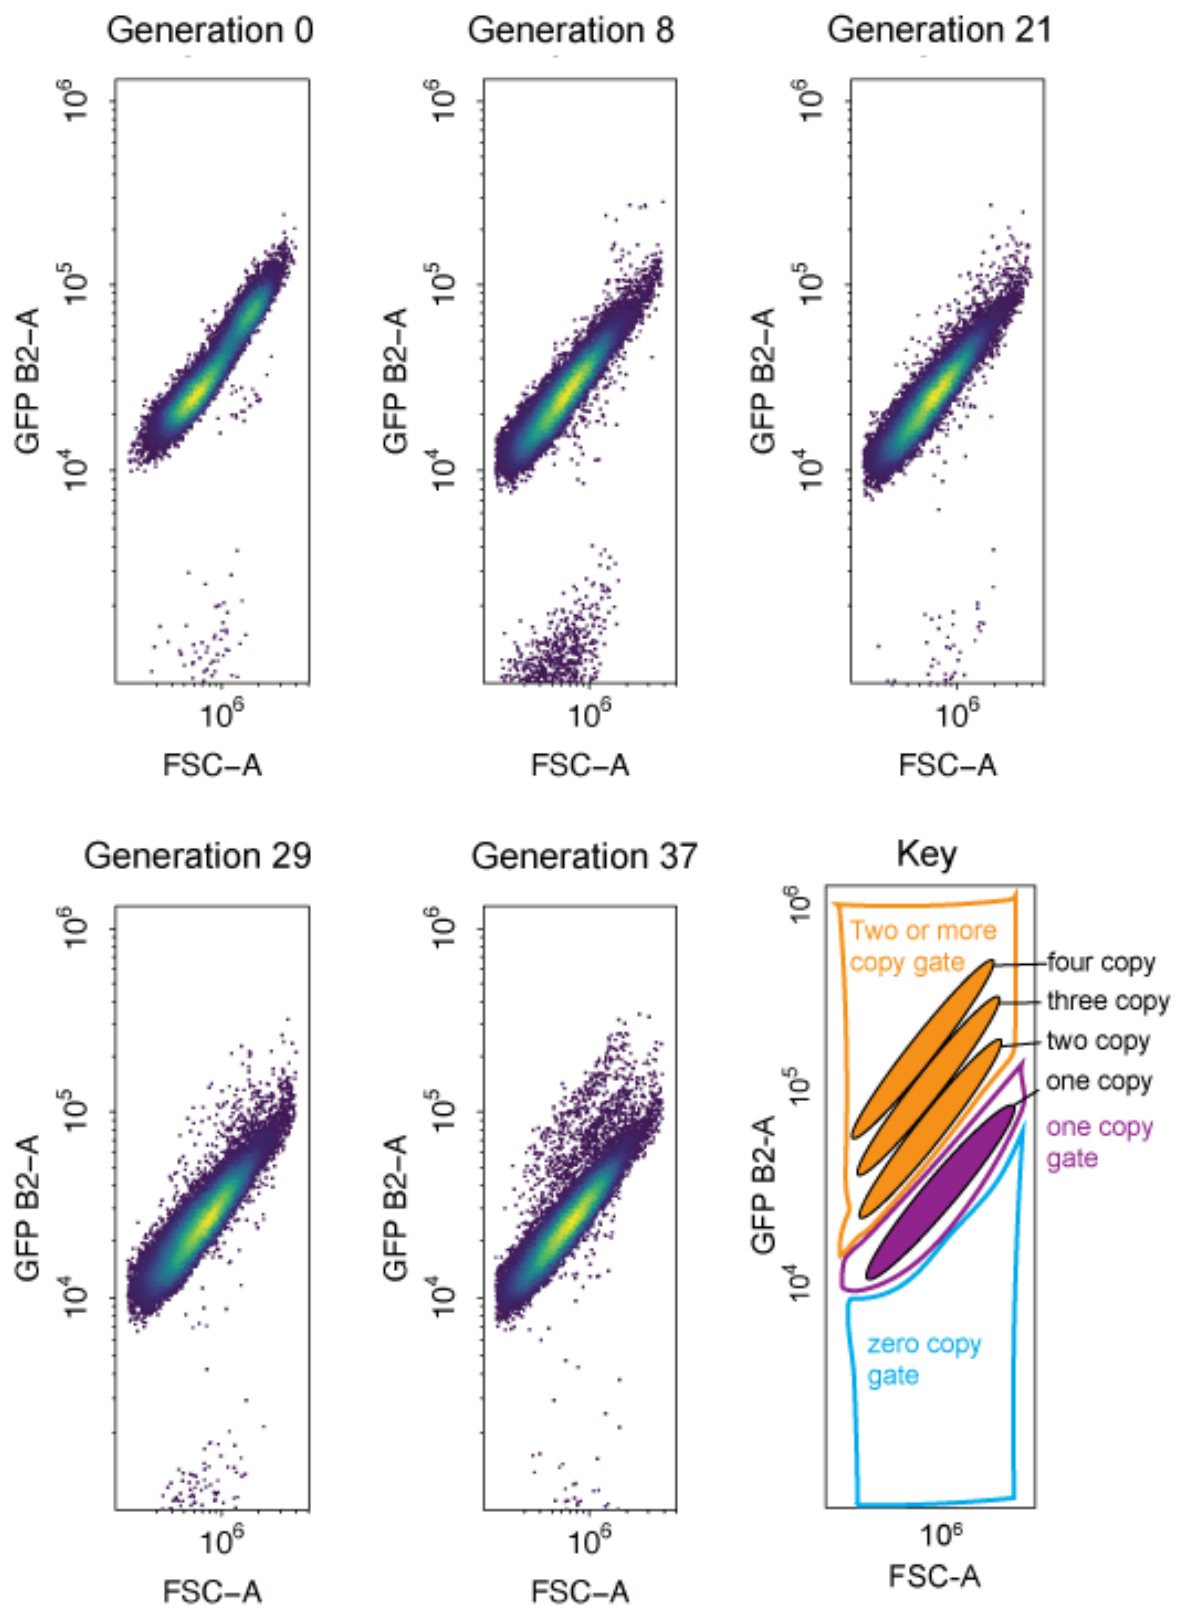

## LTR $\Delta$ population 6

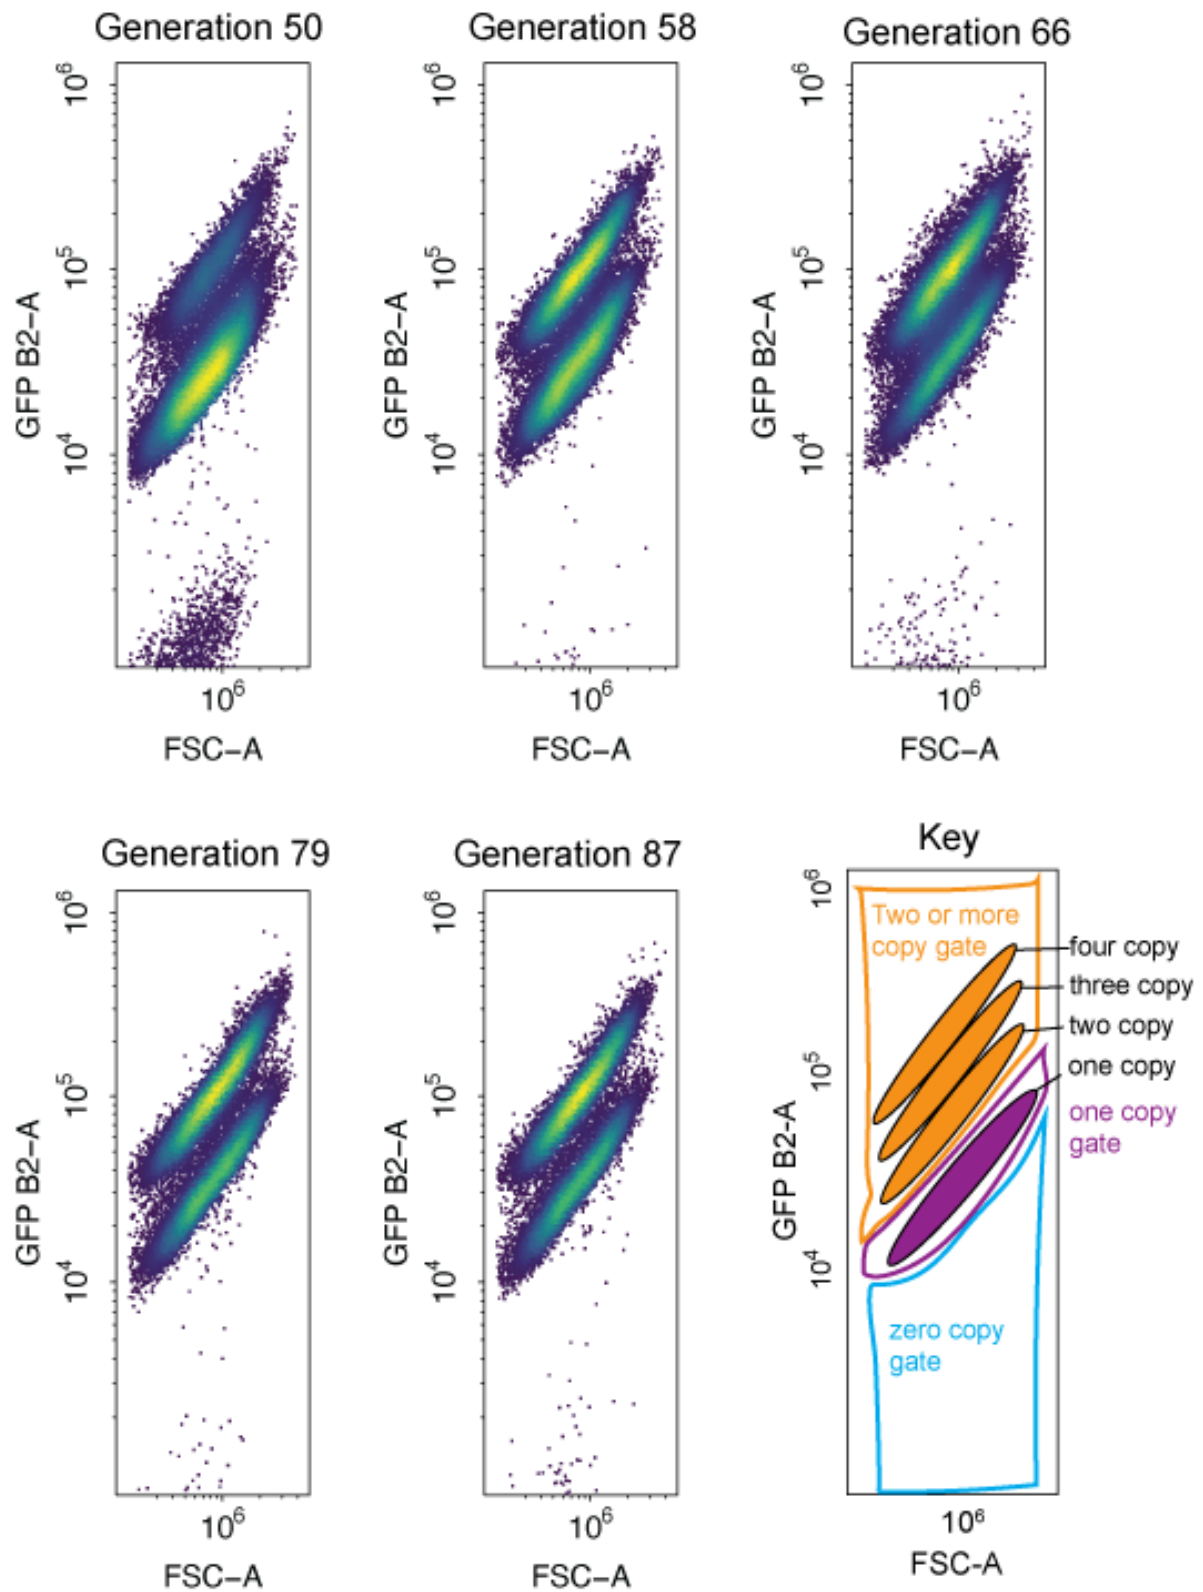



## LTR $\Delta$ population 6

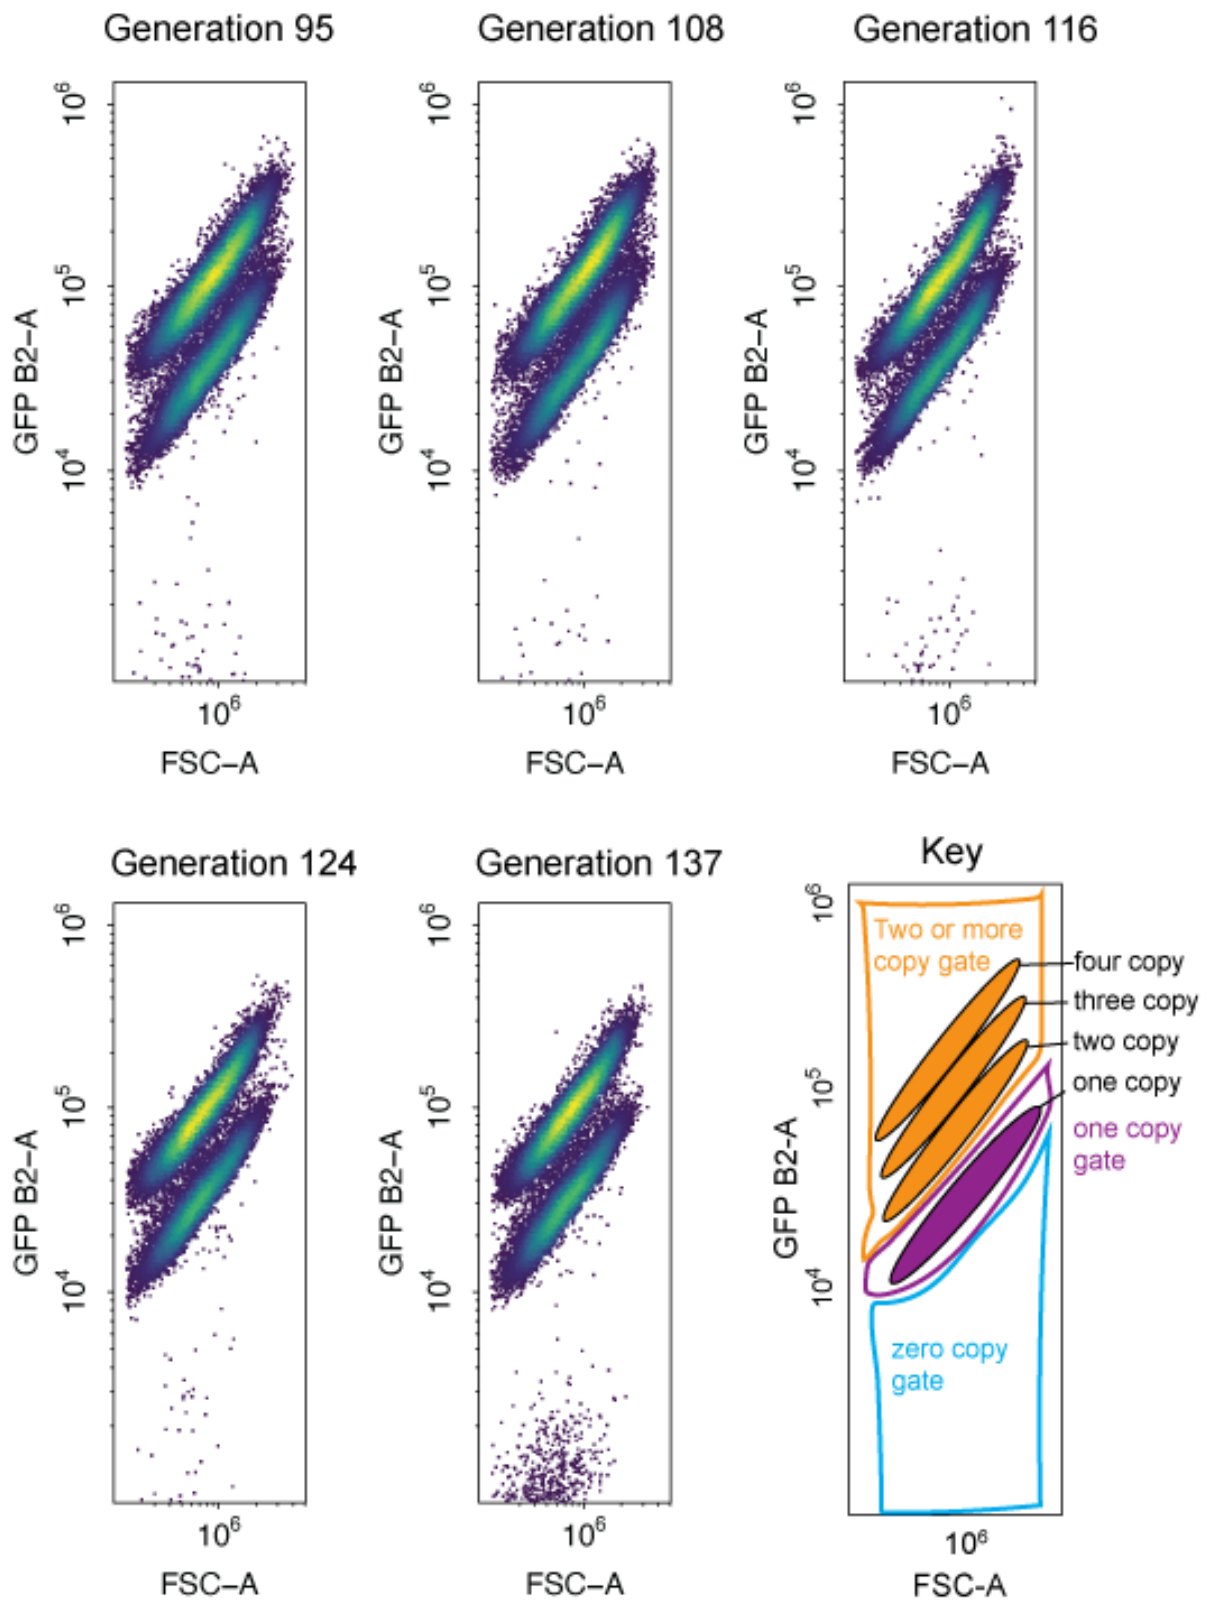

## LTR $\Delta$ population 7

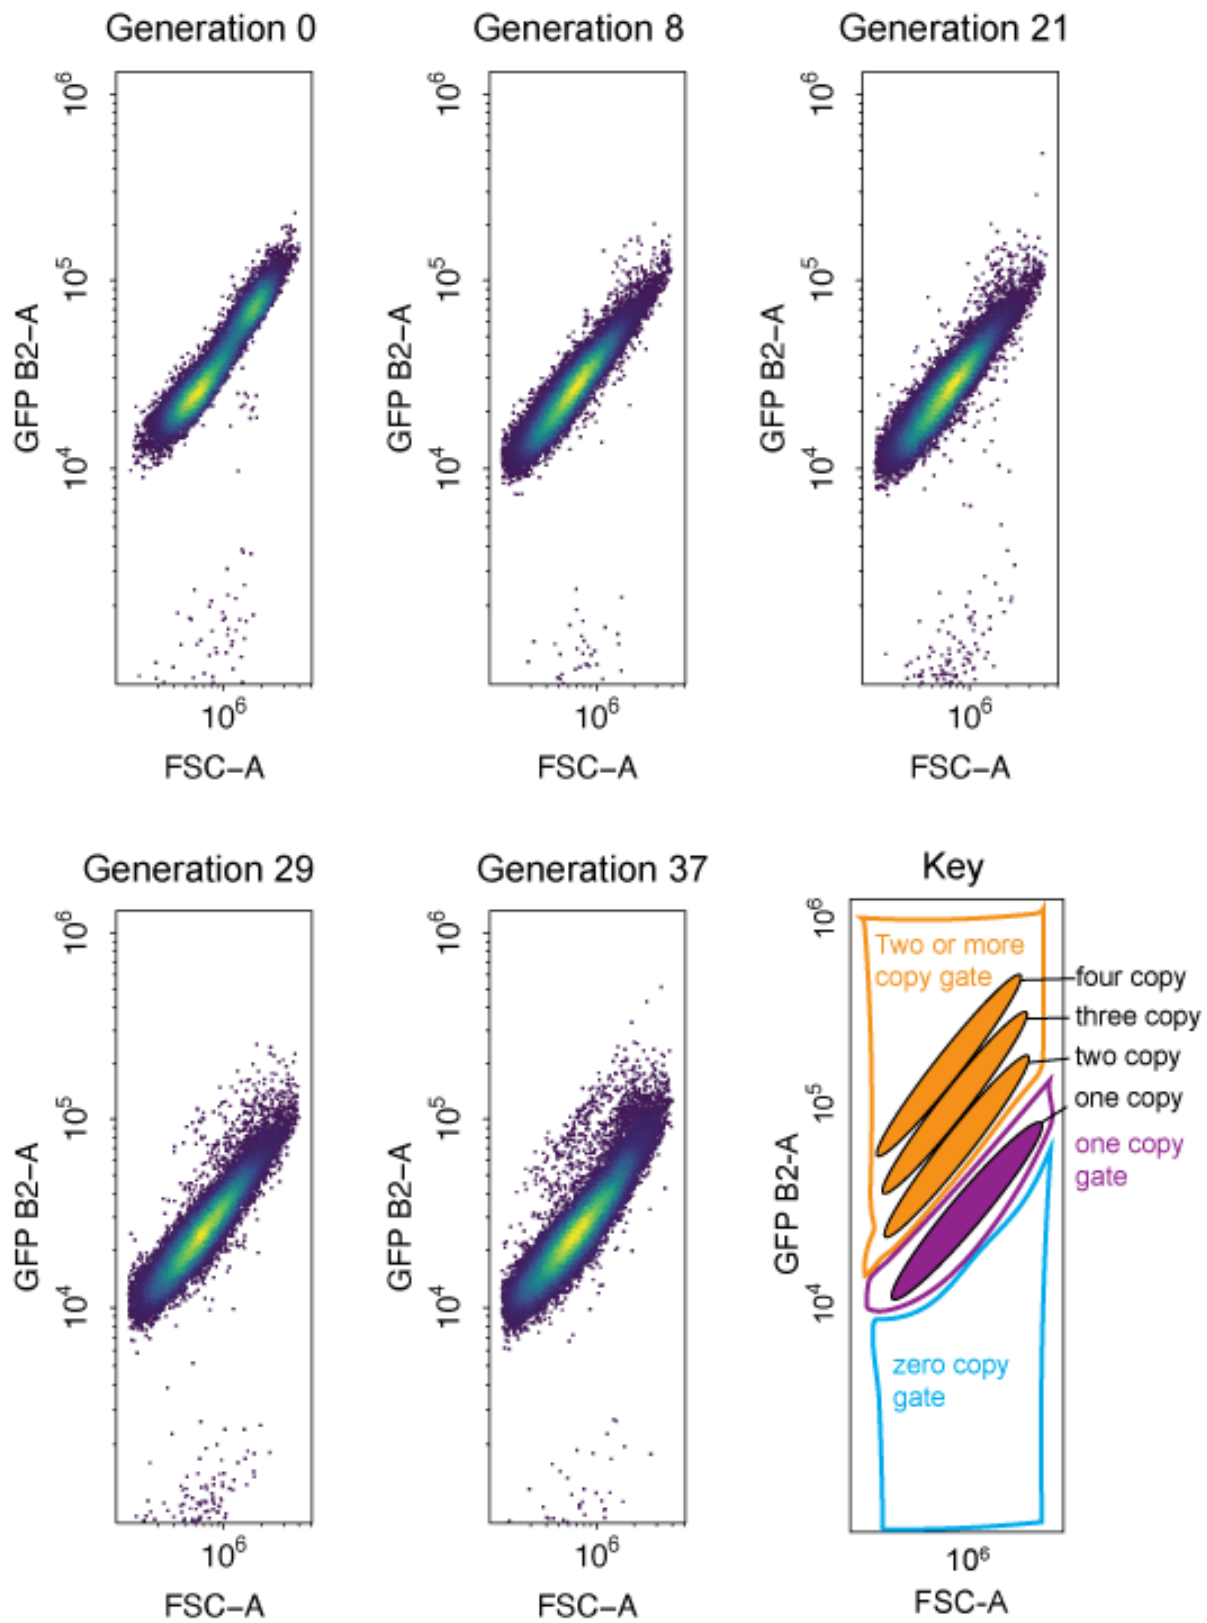

## LTR $\Delta$ population 7

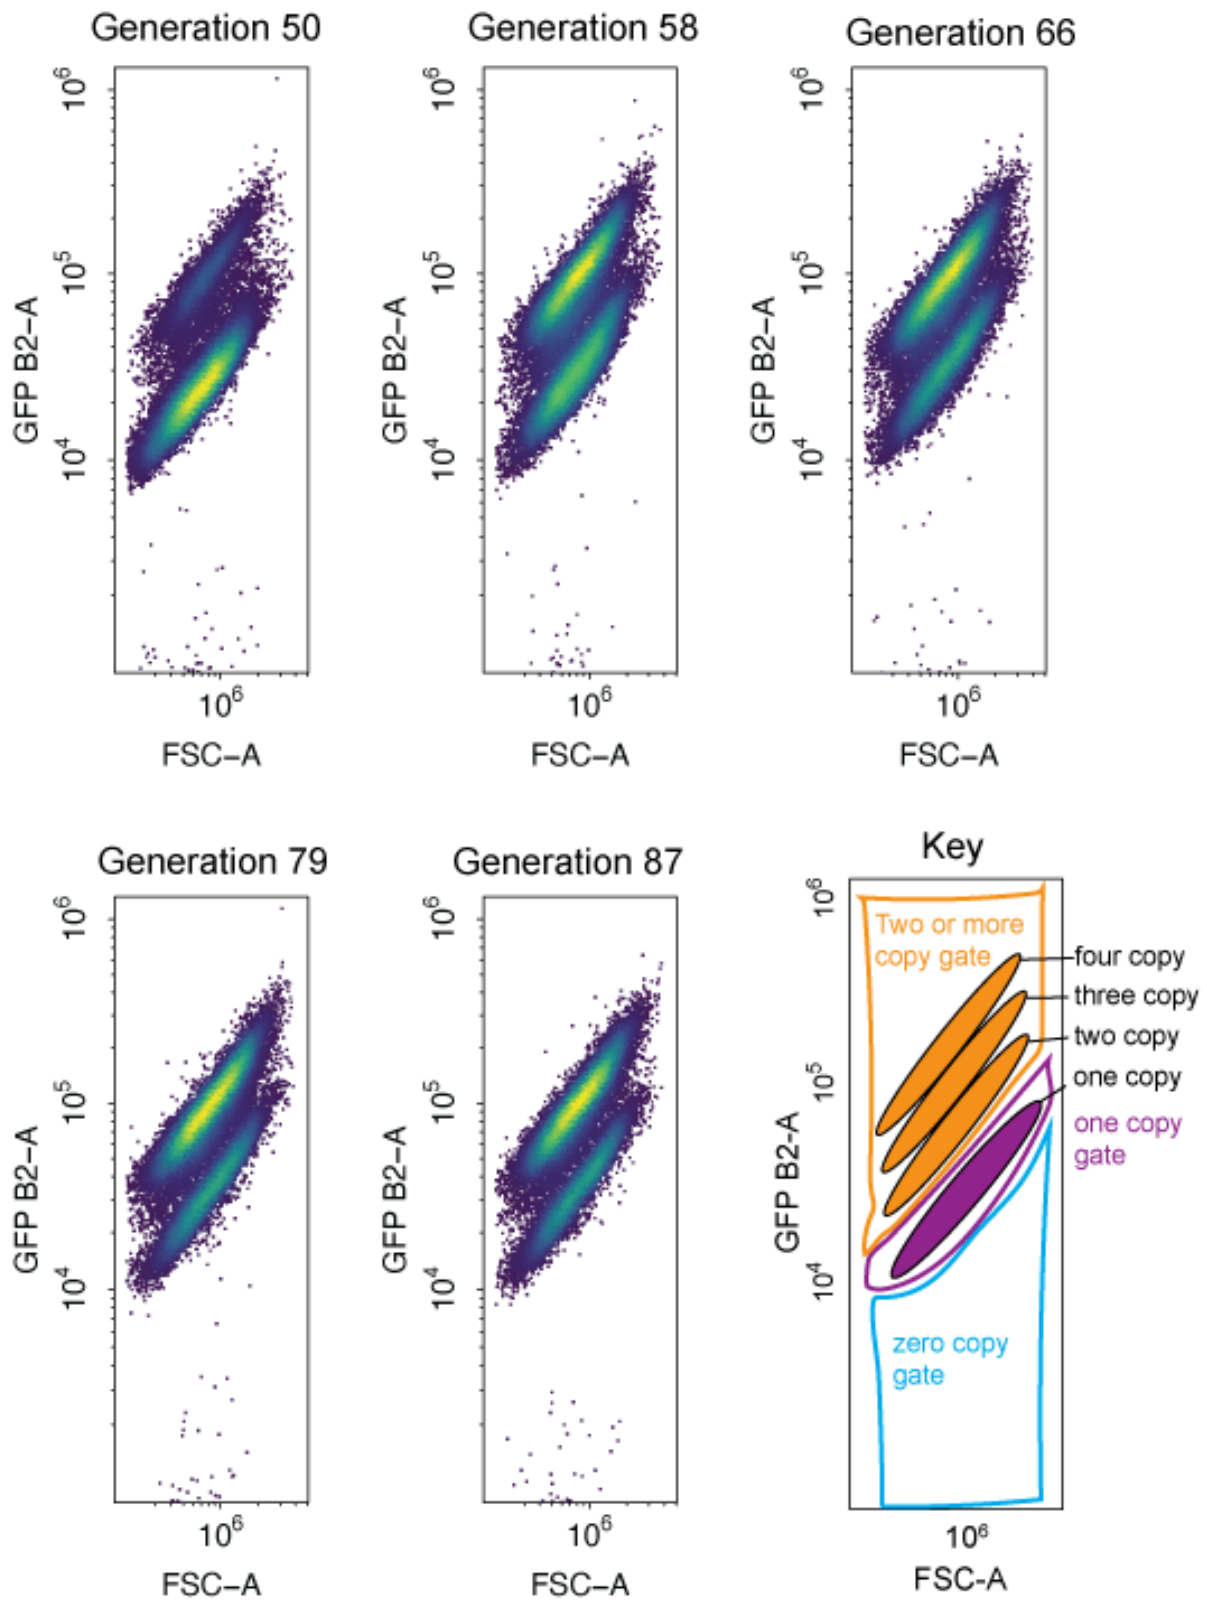

## LTR $\Delta$ population 7

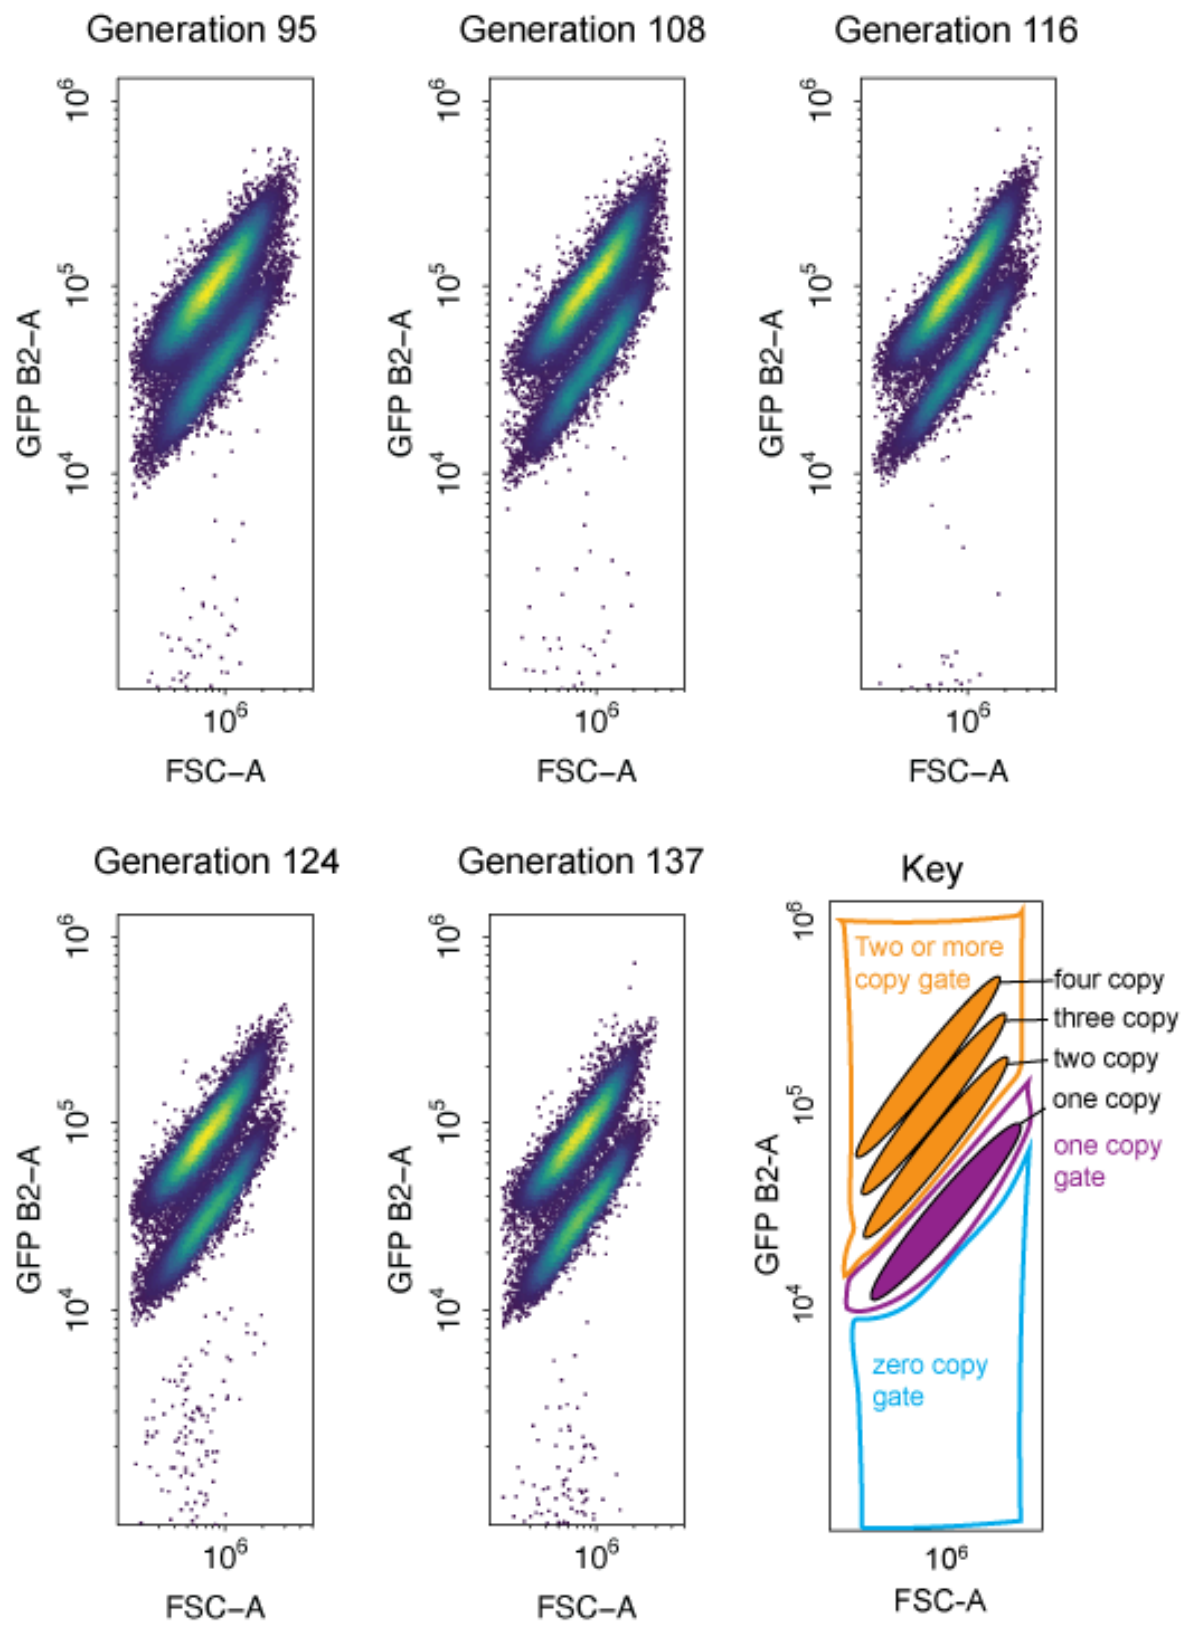

## ARS $\Delta$ population 1

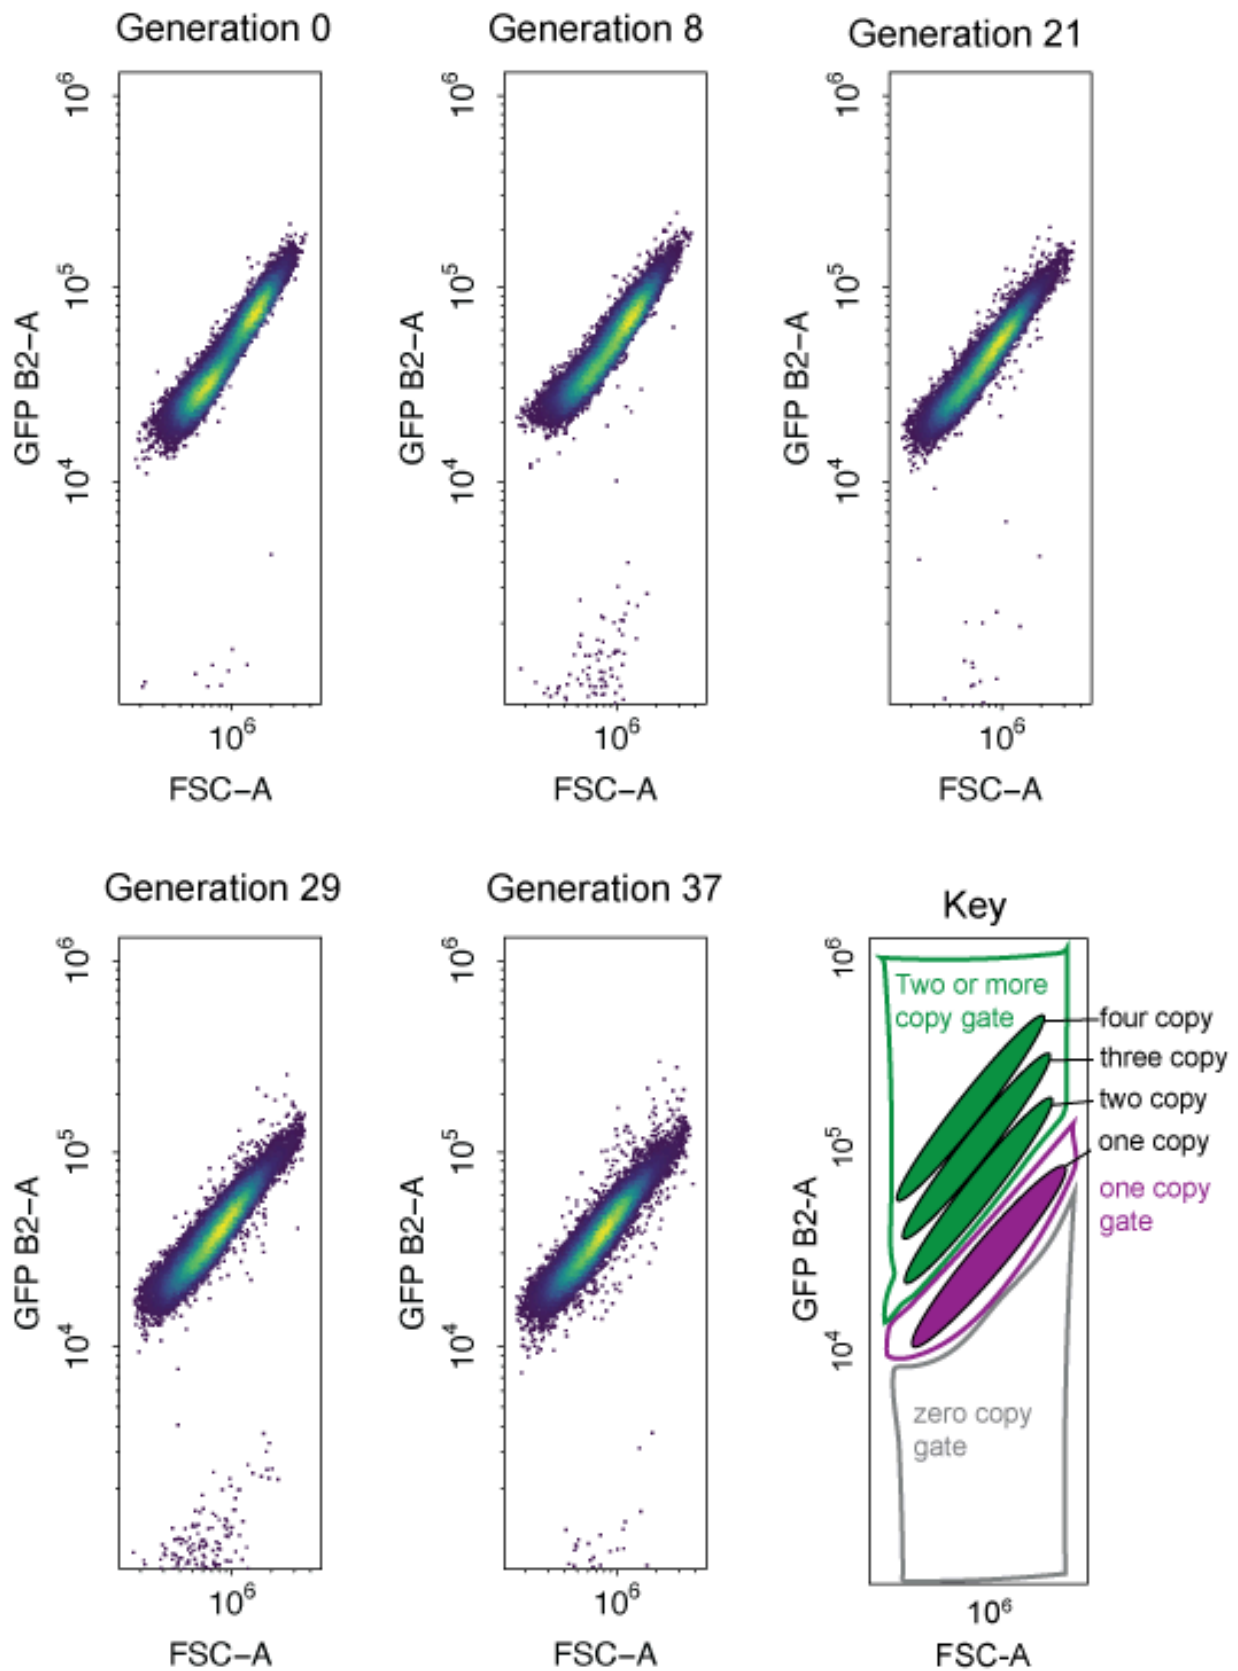

## ARS $\Delta$ population 1

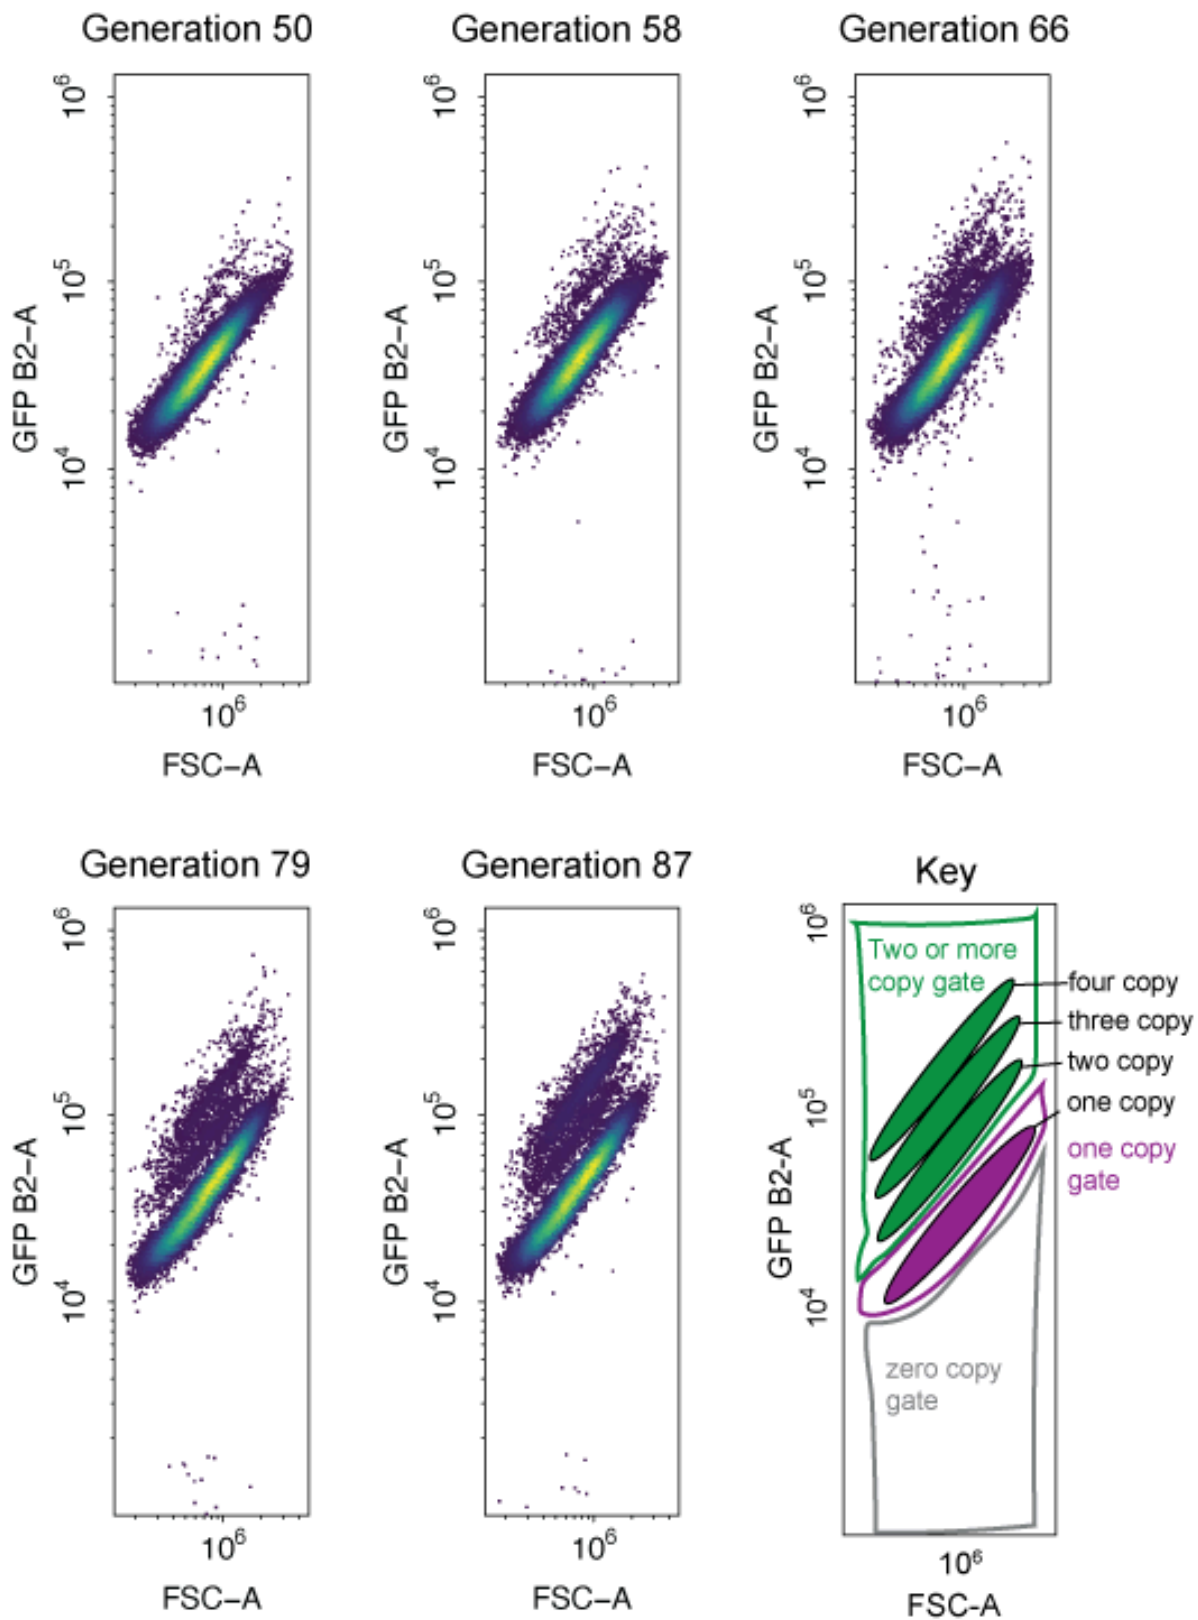

## ARS $\Delta$ population 1

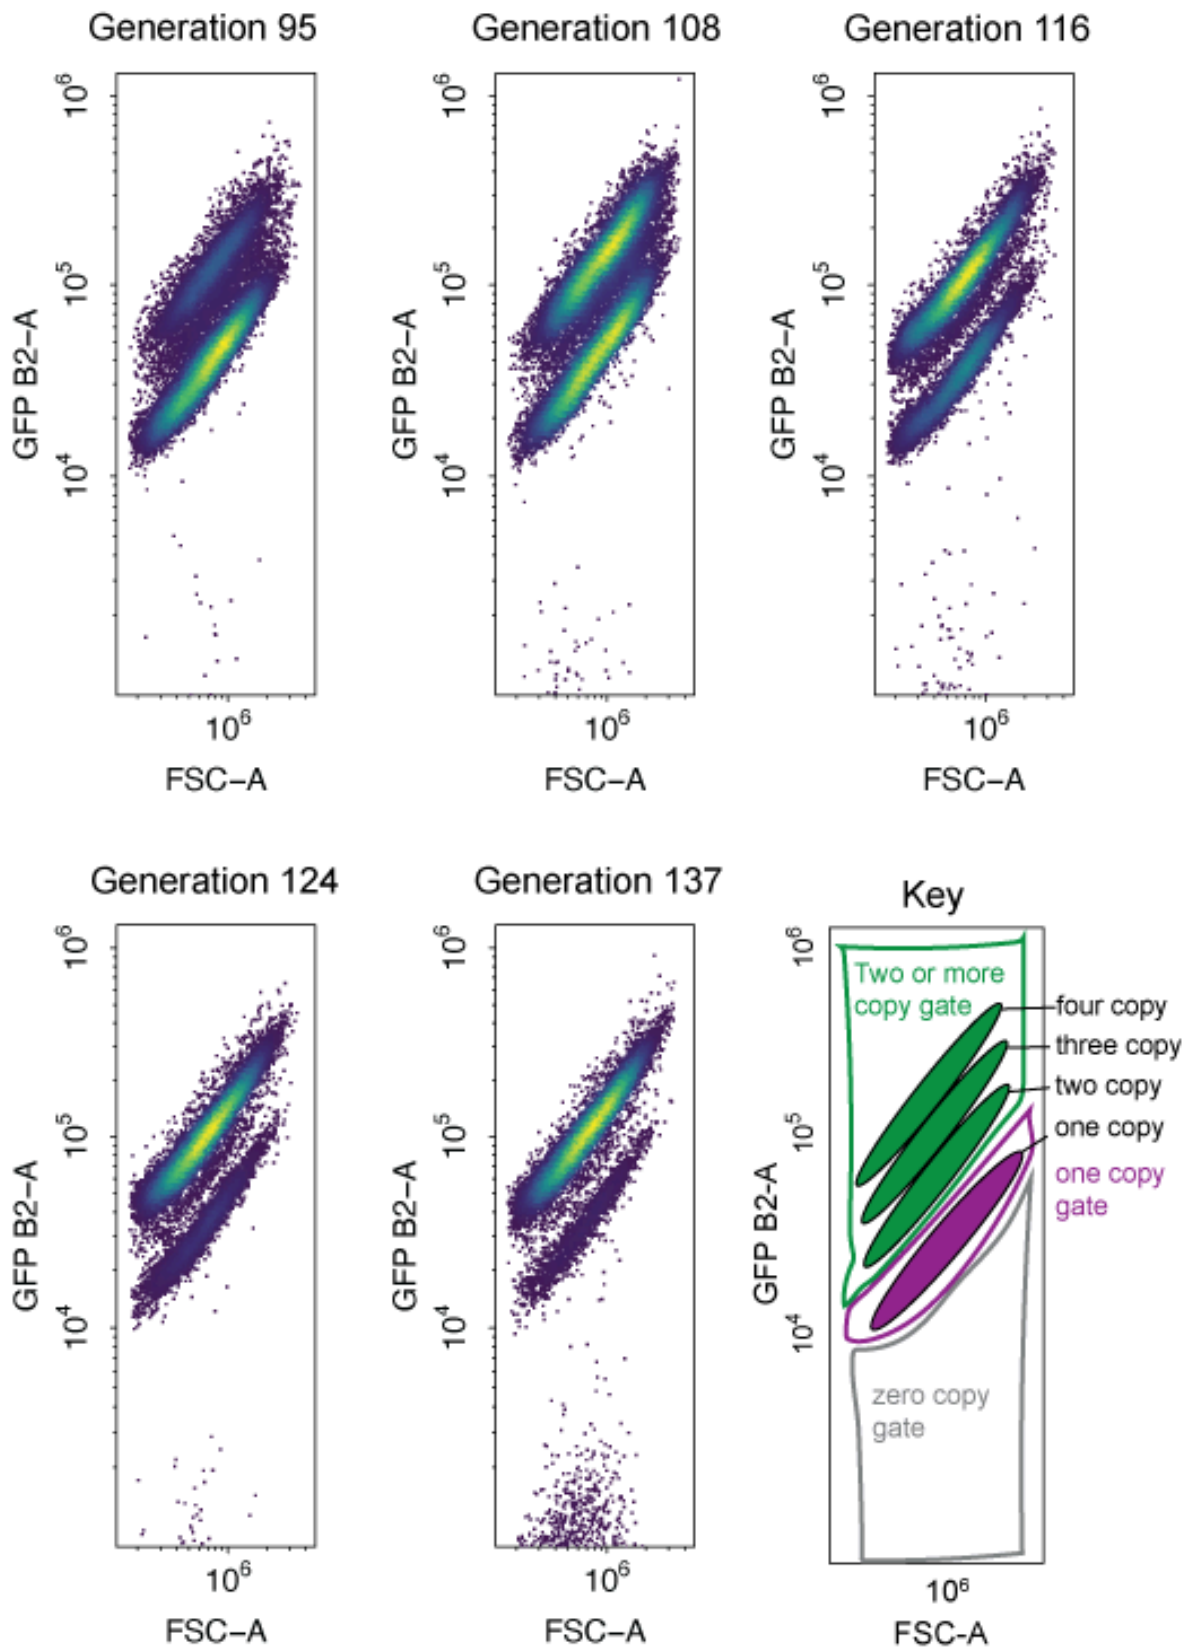

## ARS $\Delta$ population 3

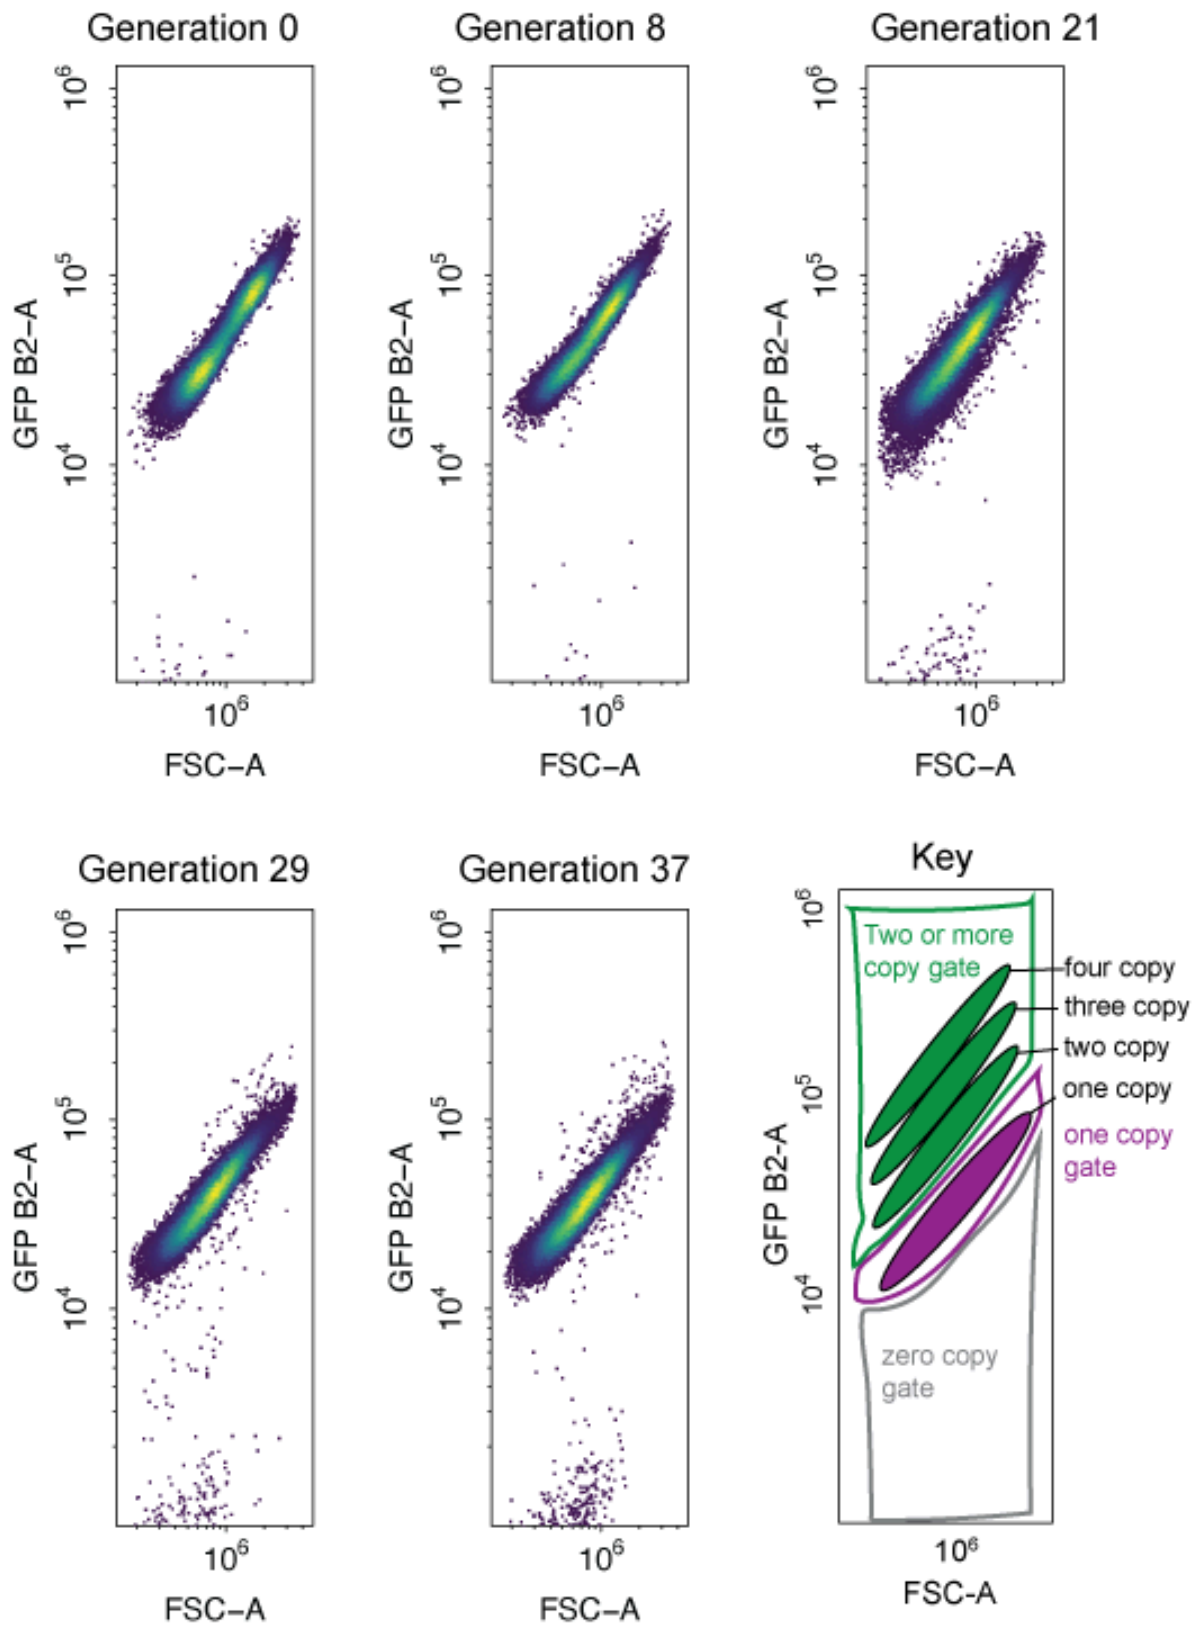



## ARS $\Delta$ population 3

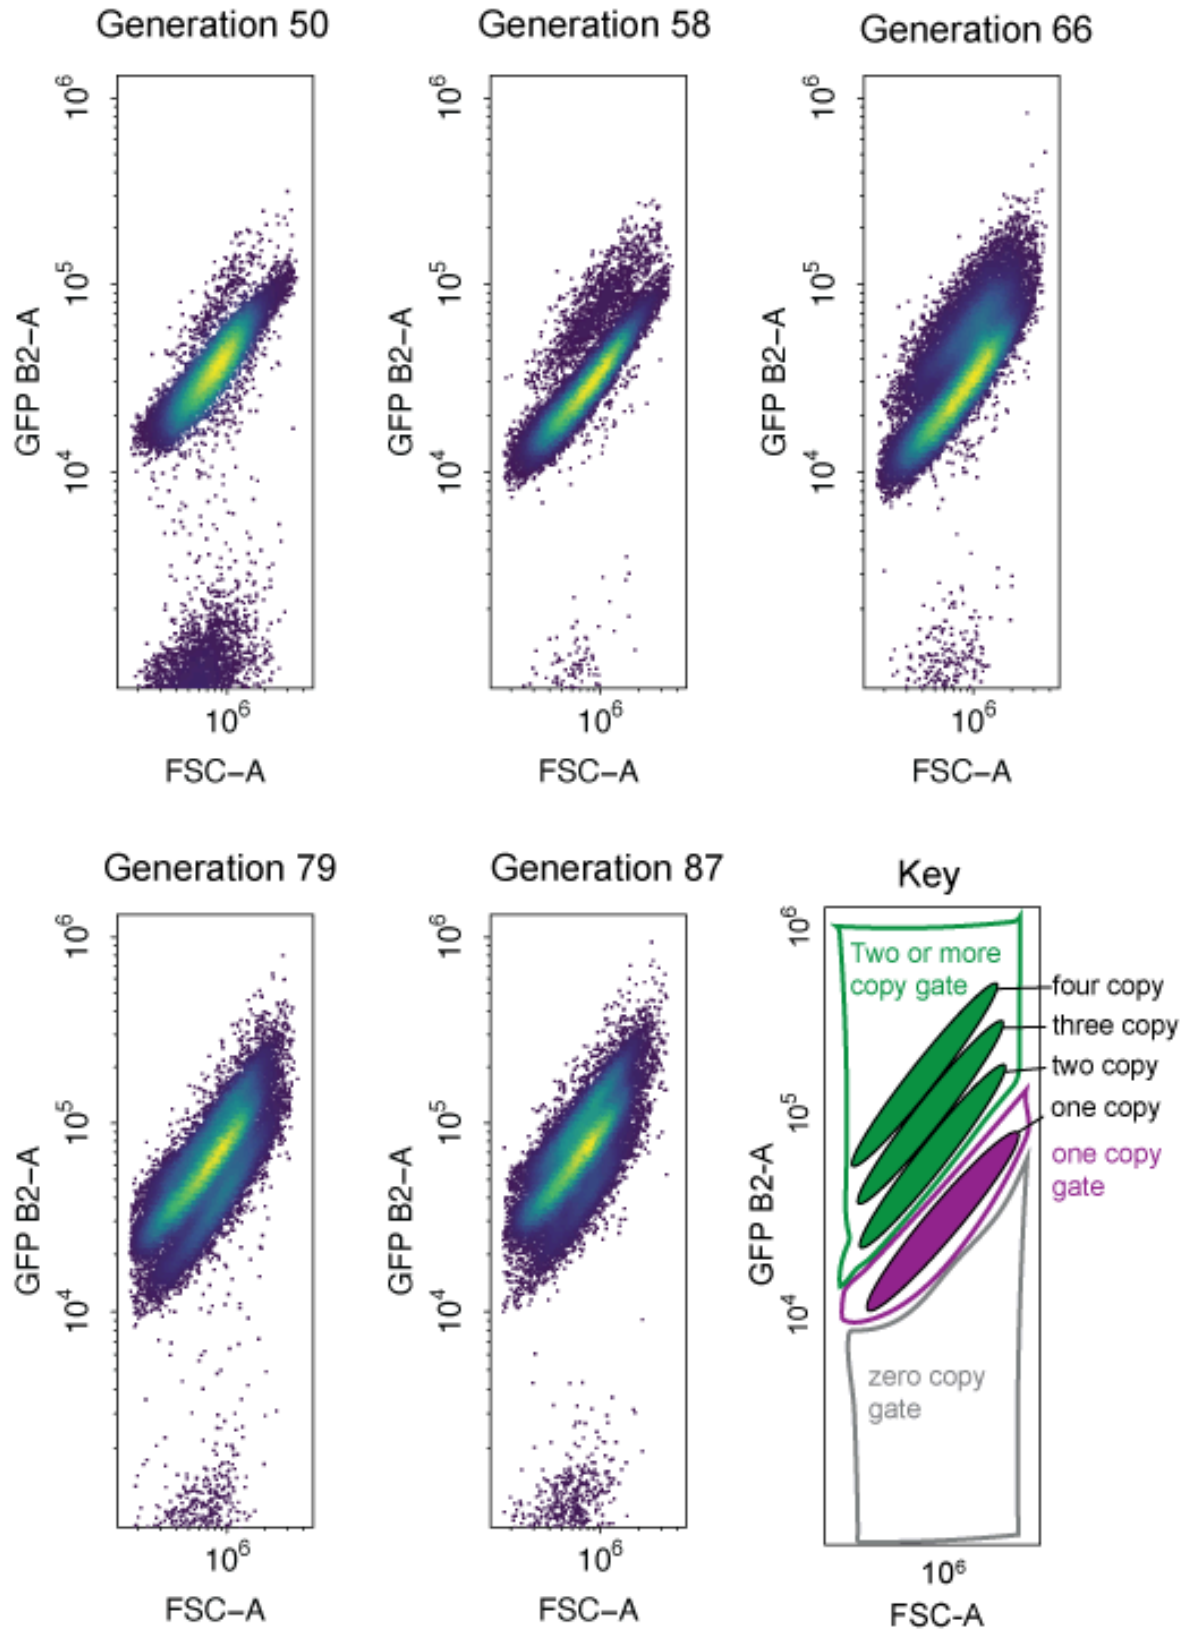

## ARS $\Delta$ population 3

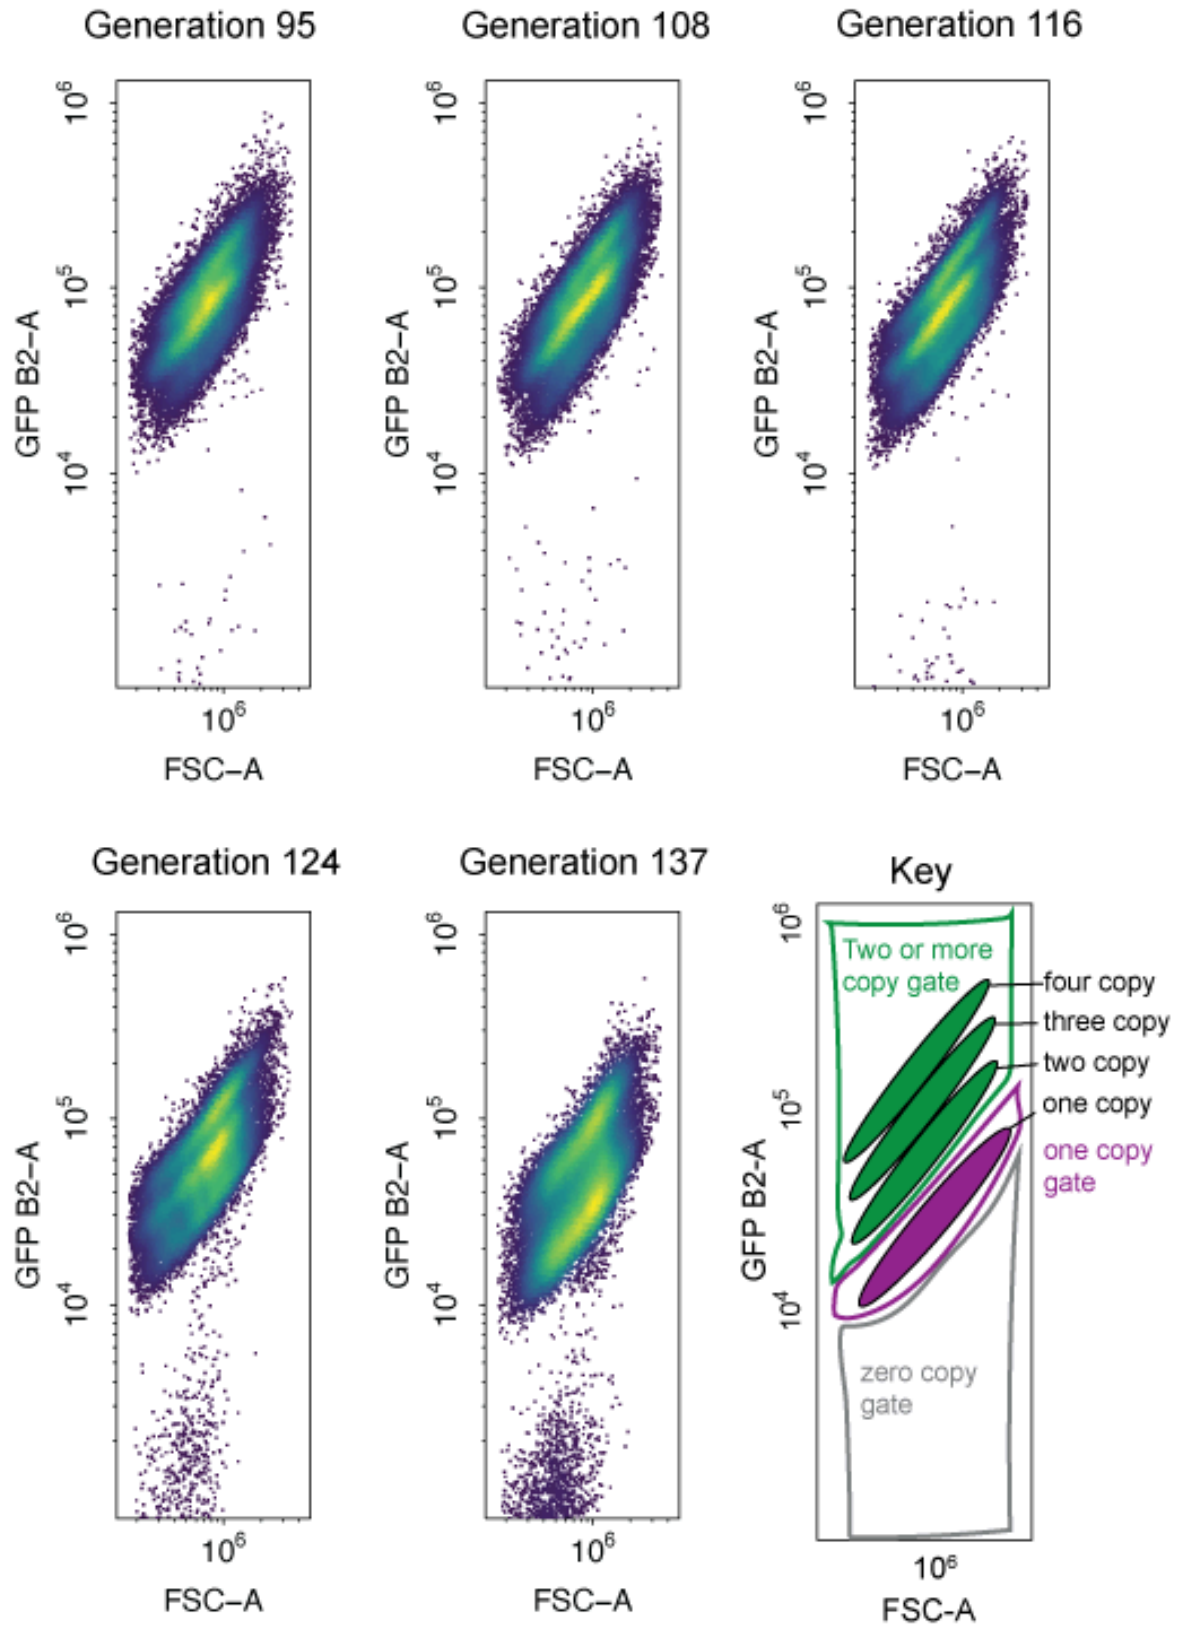

## ARS $\Delta$ population 4

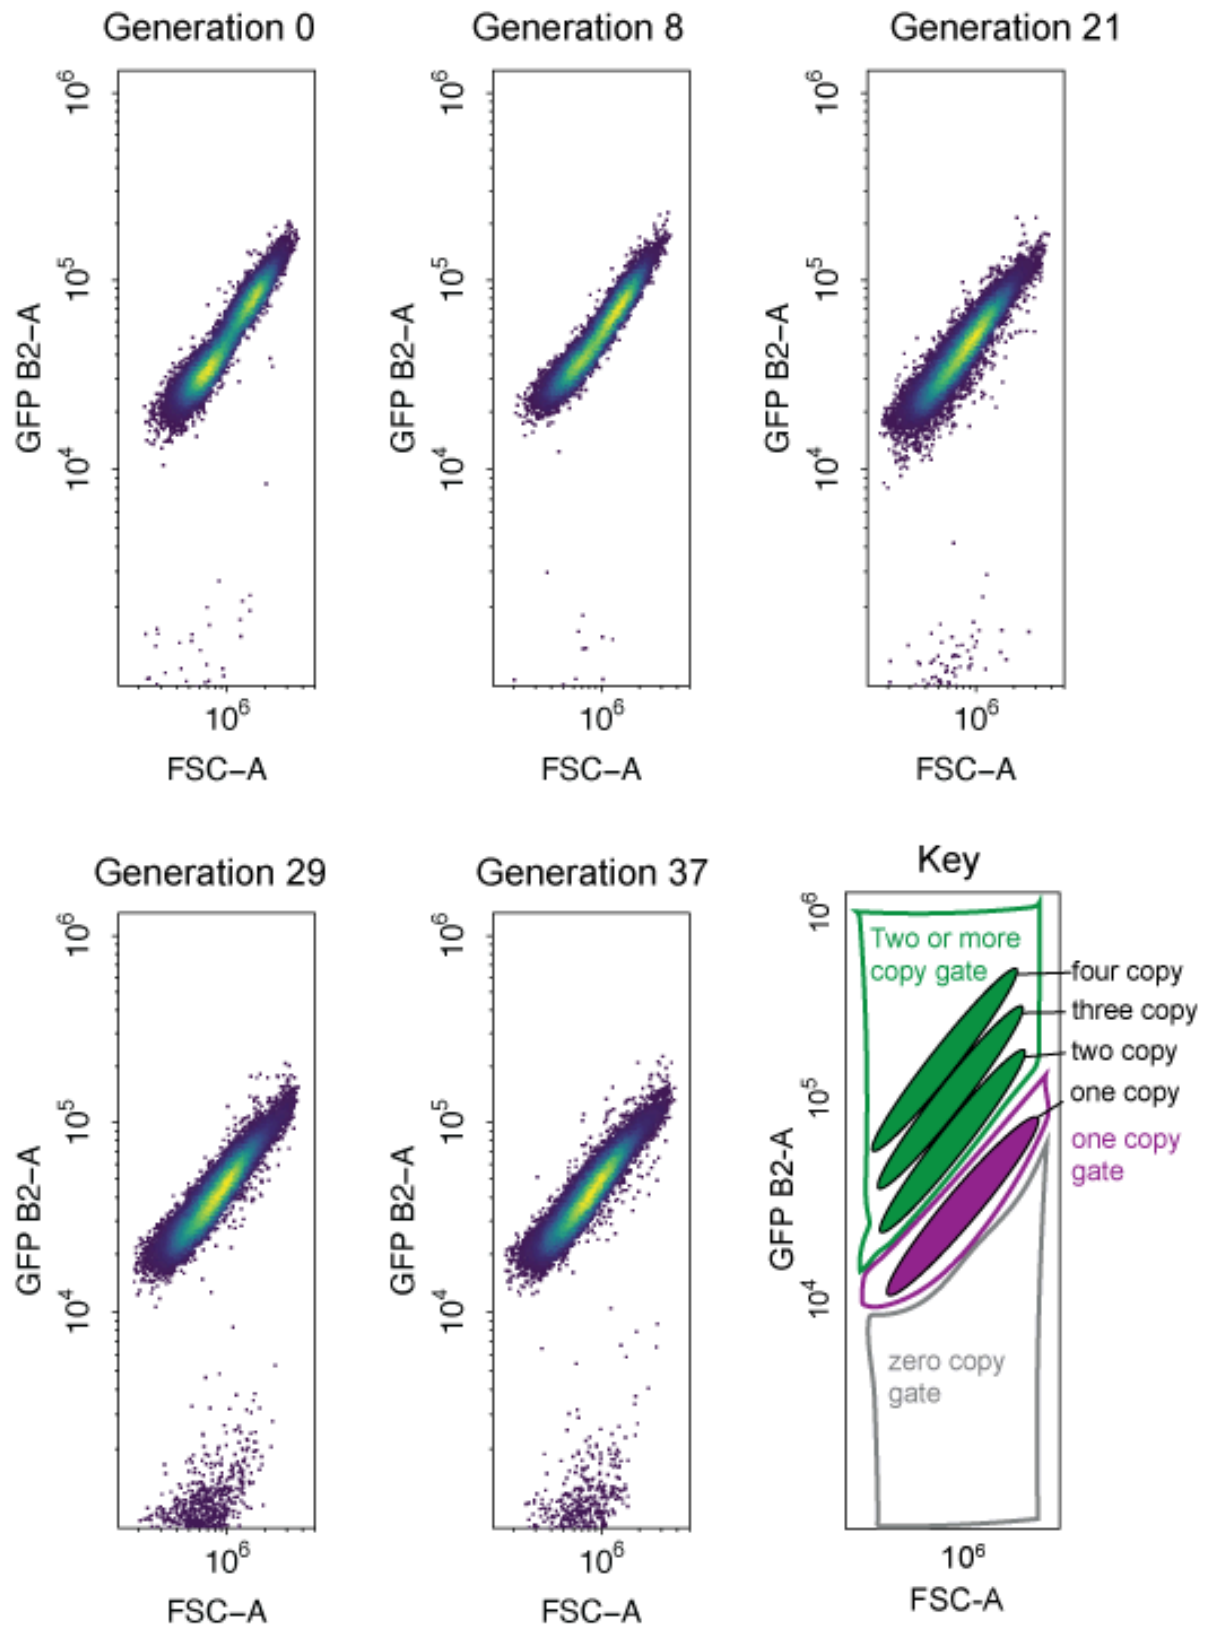

## ARS $\Delta$ population 4

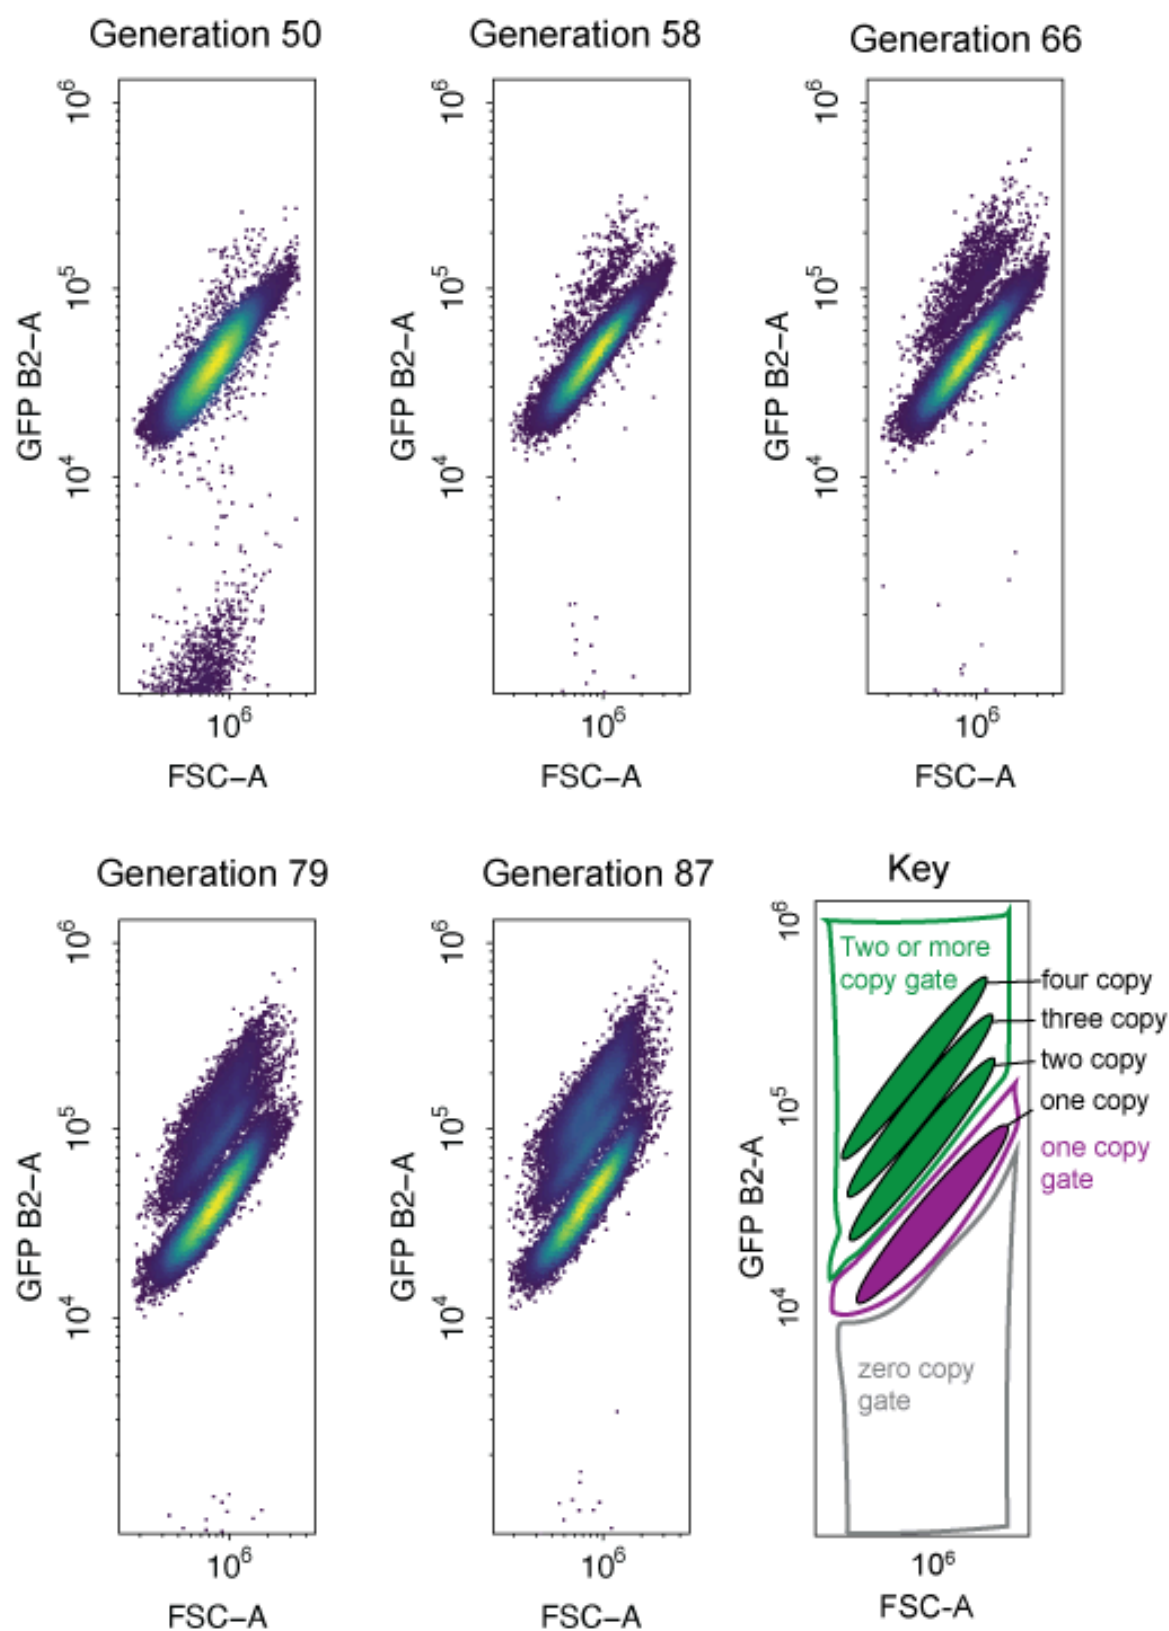

## ARS $\Delta$ population 4

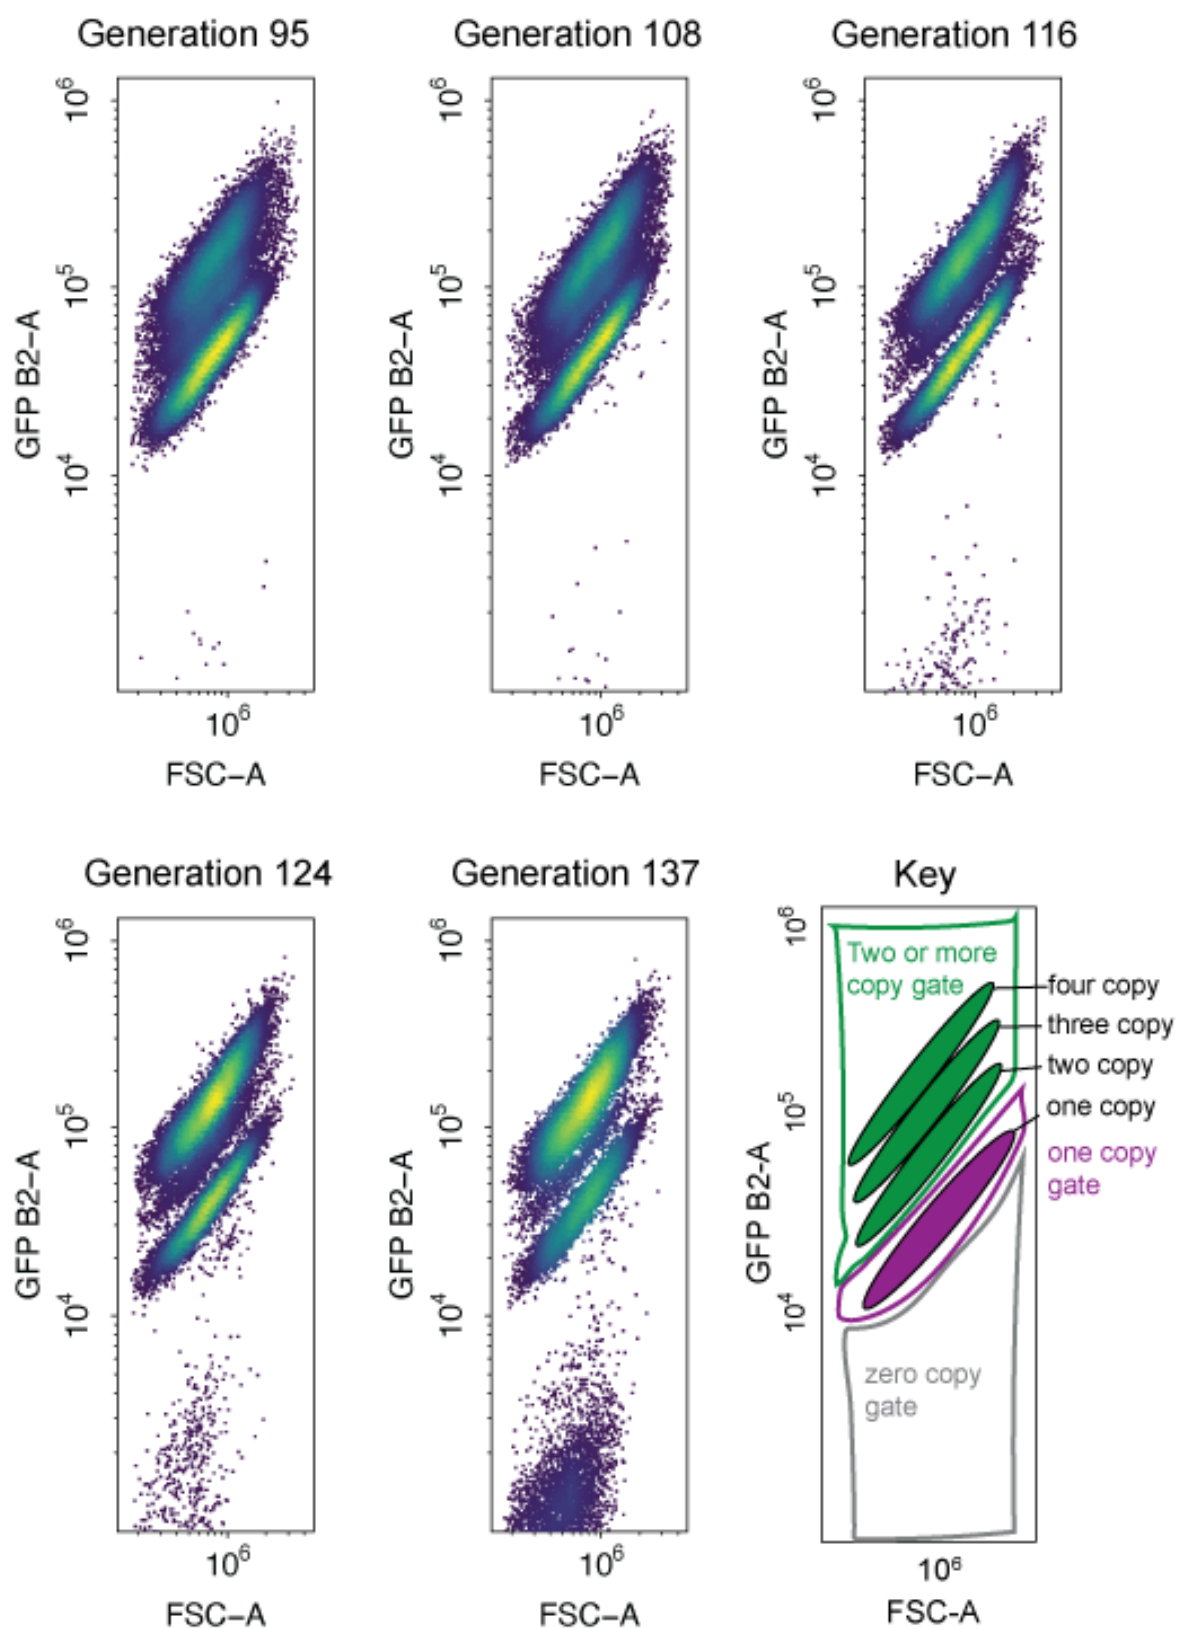

## ARS $\Delta$ population 5

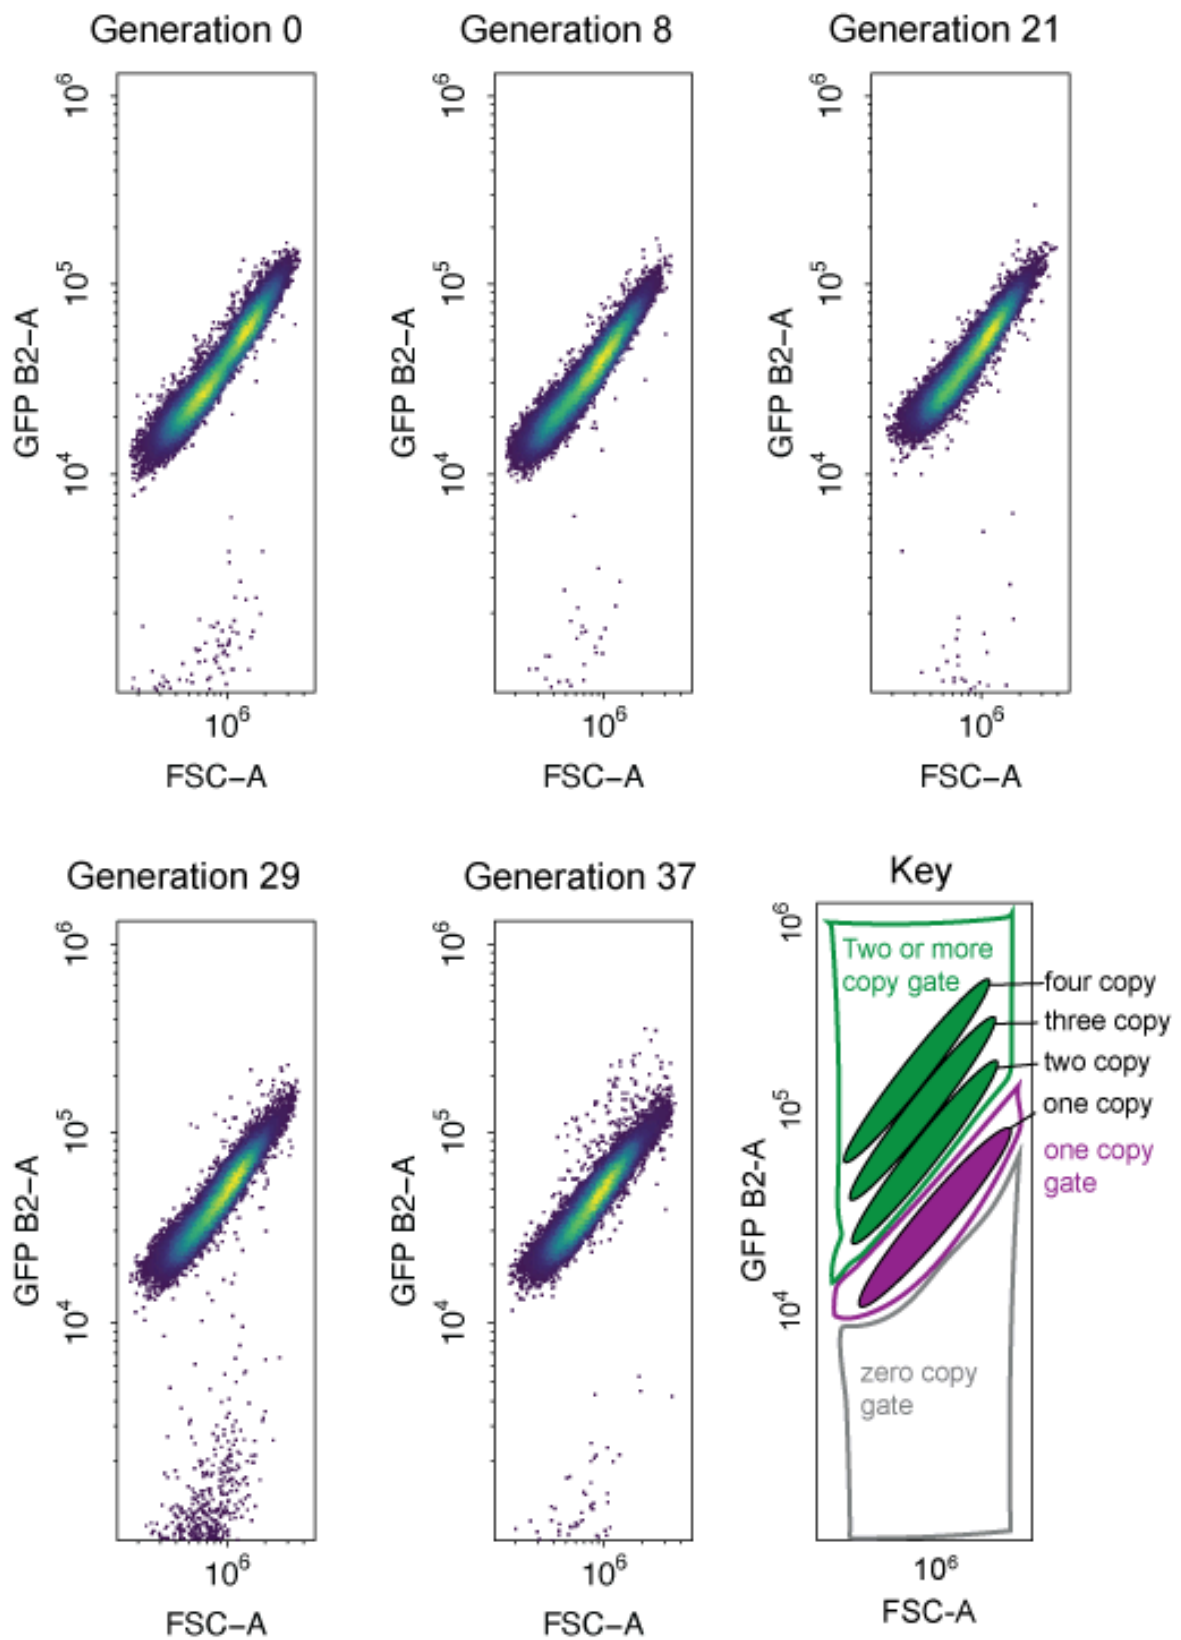

## ARS $\Delta$ population 5

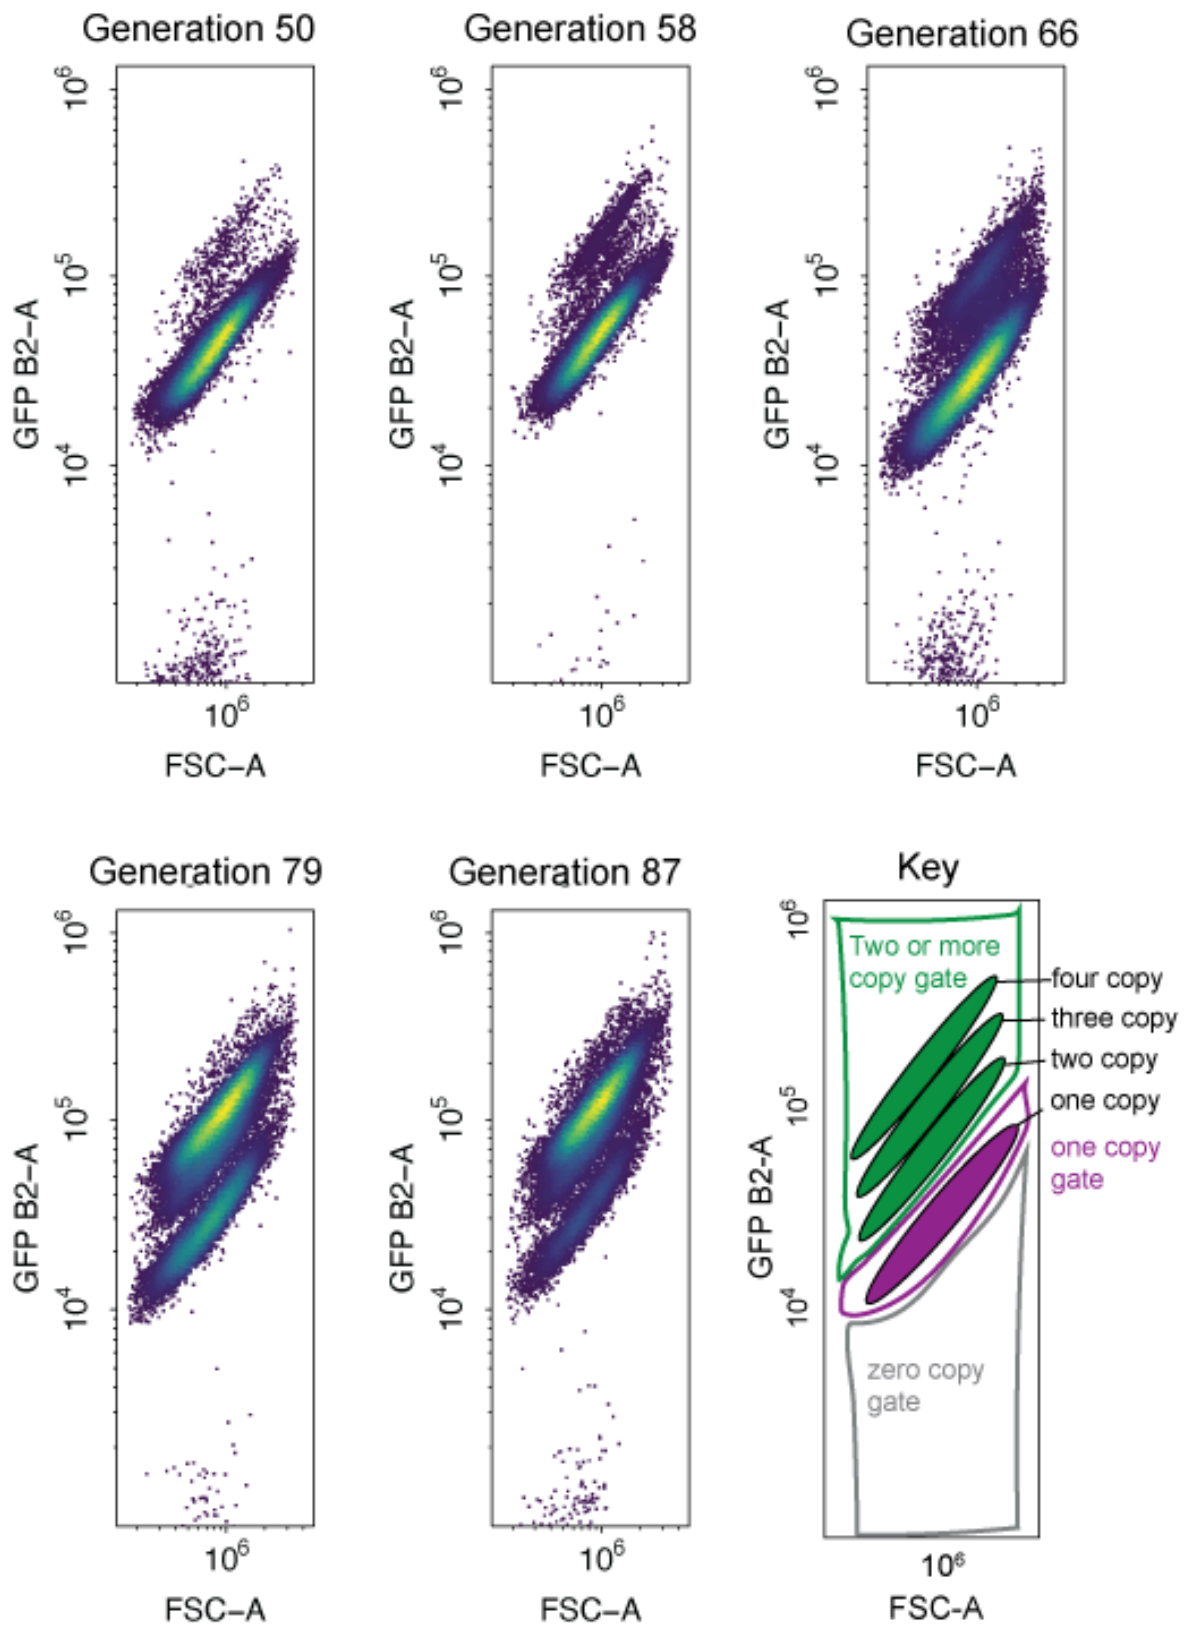

## ARS $\Delta$ population 5

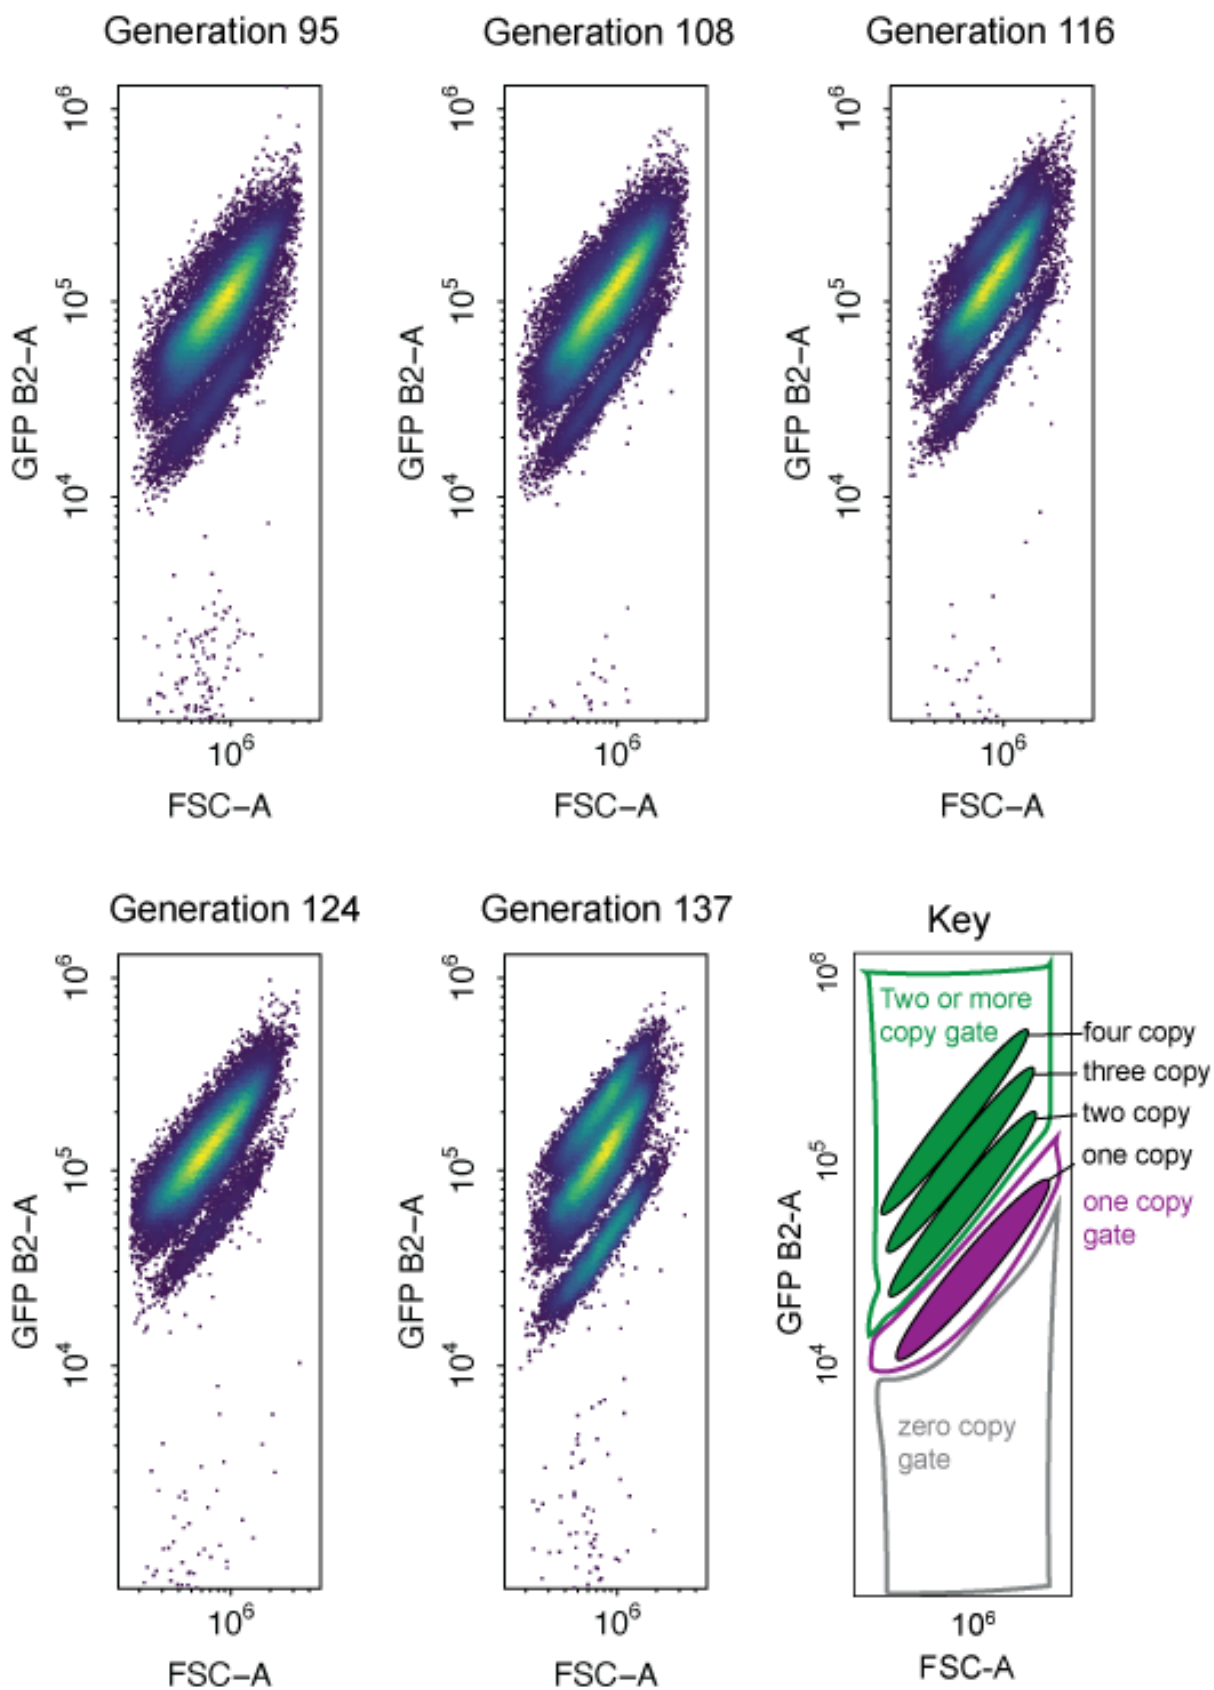



## ARS $\Delta$ population 6

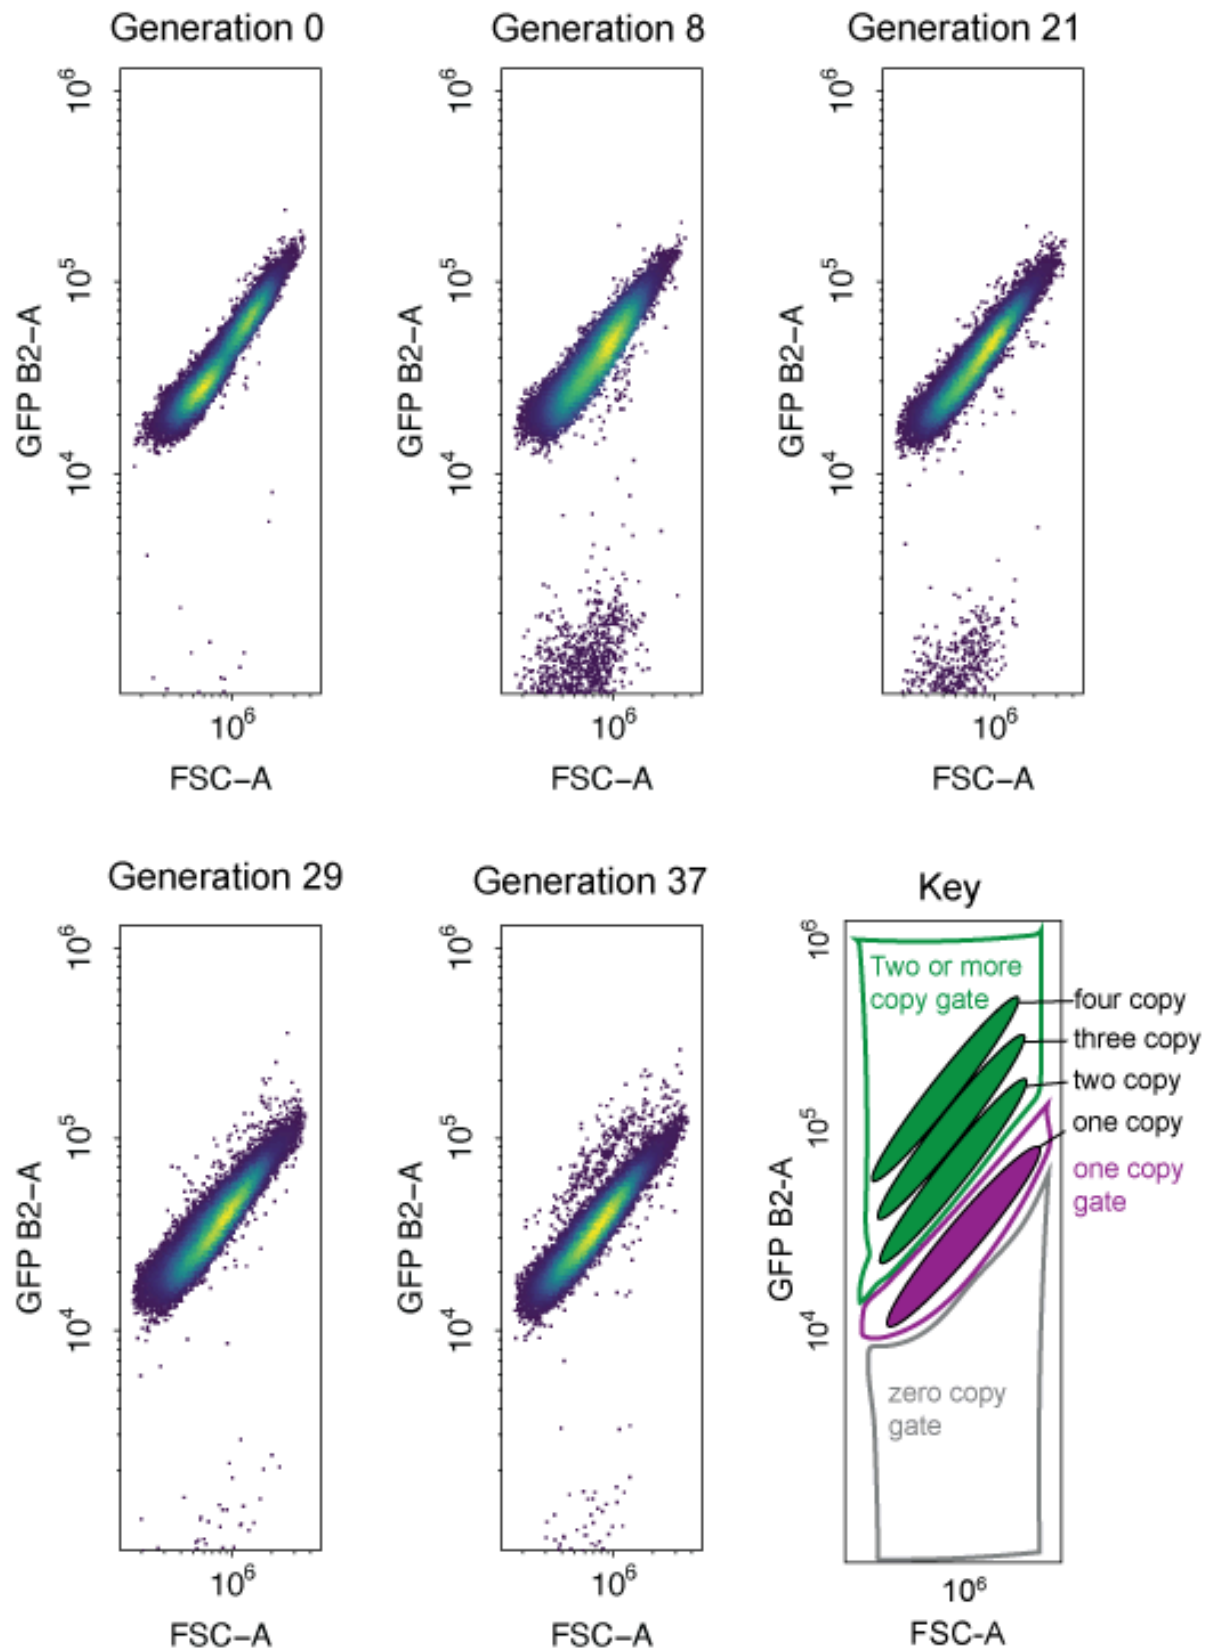

## ARS $\Delta$ population 6

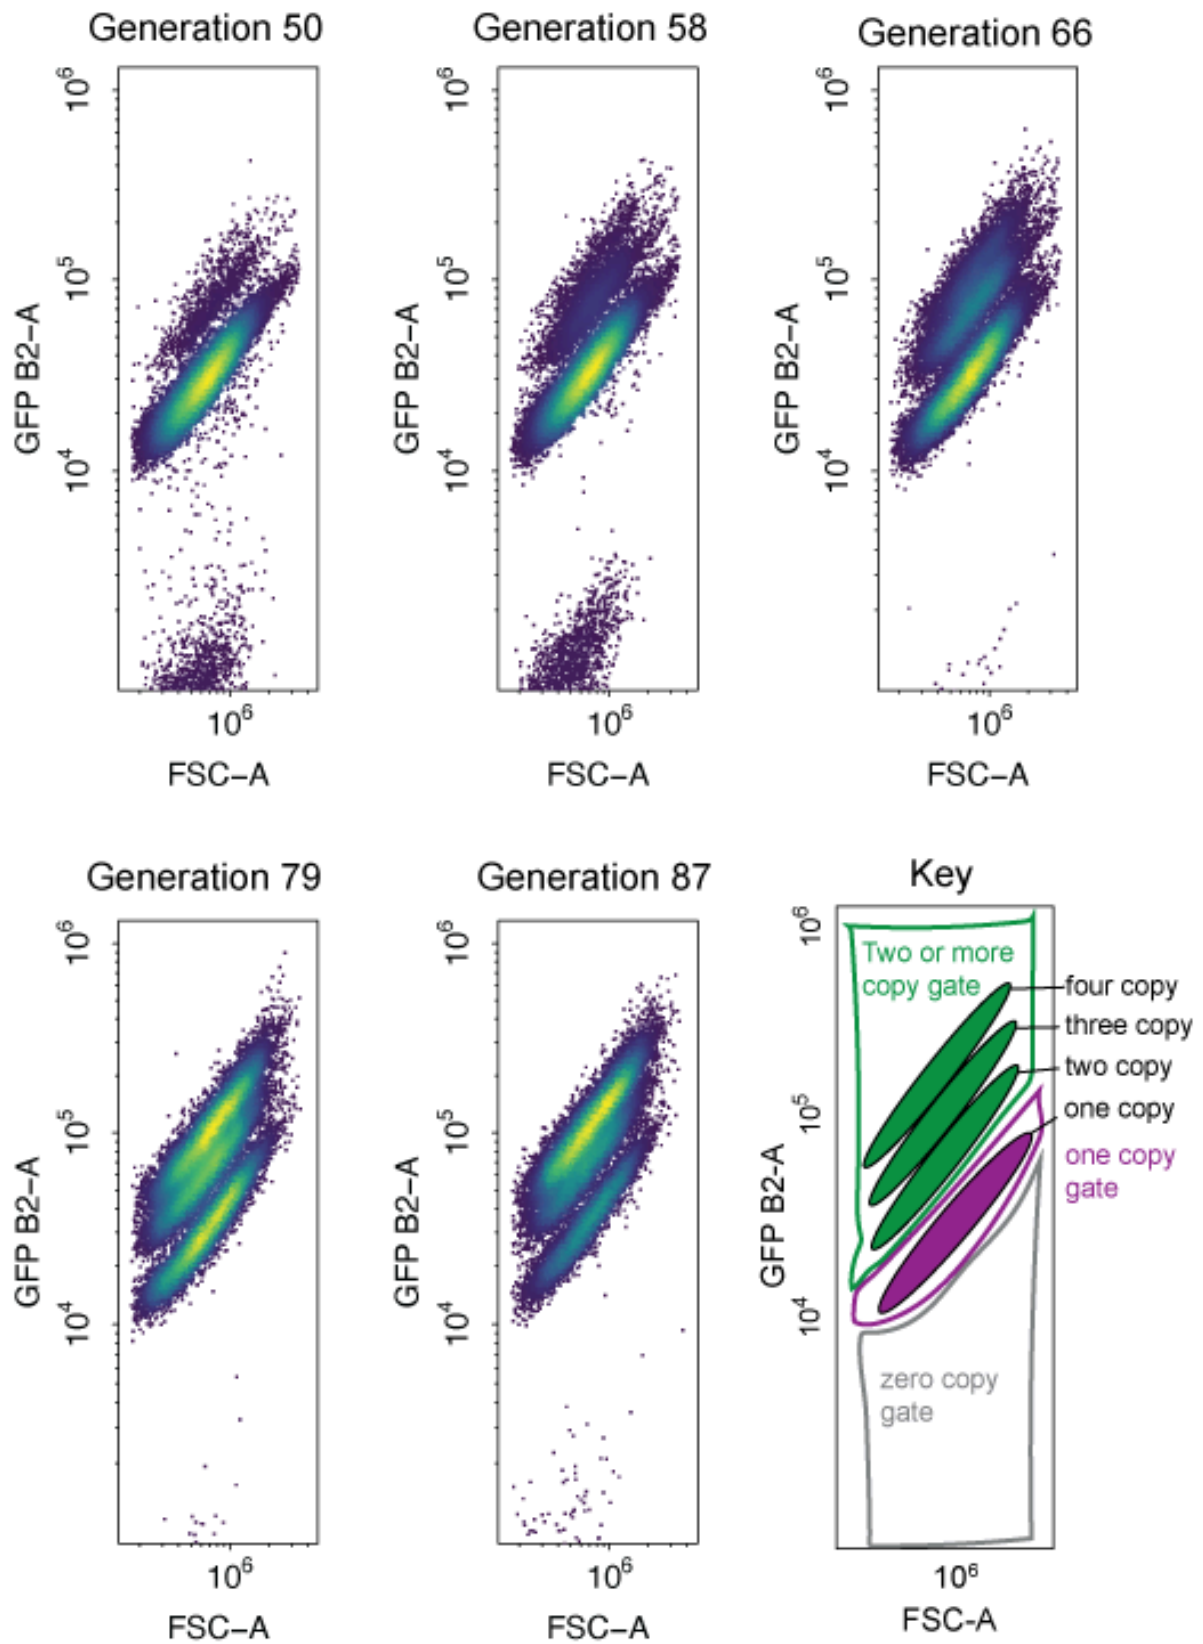

## ARS $\Delta$ population 6

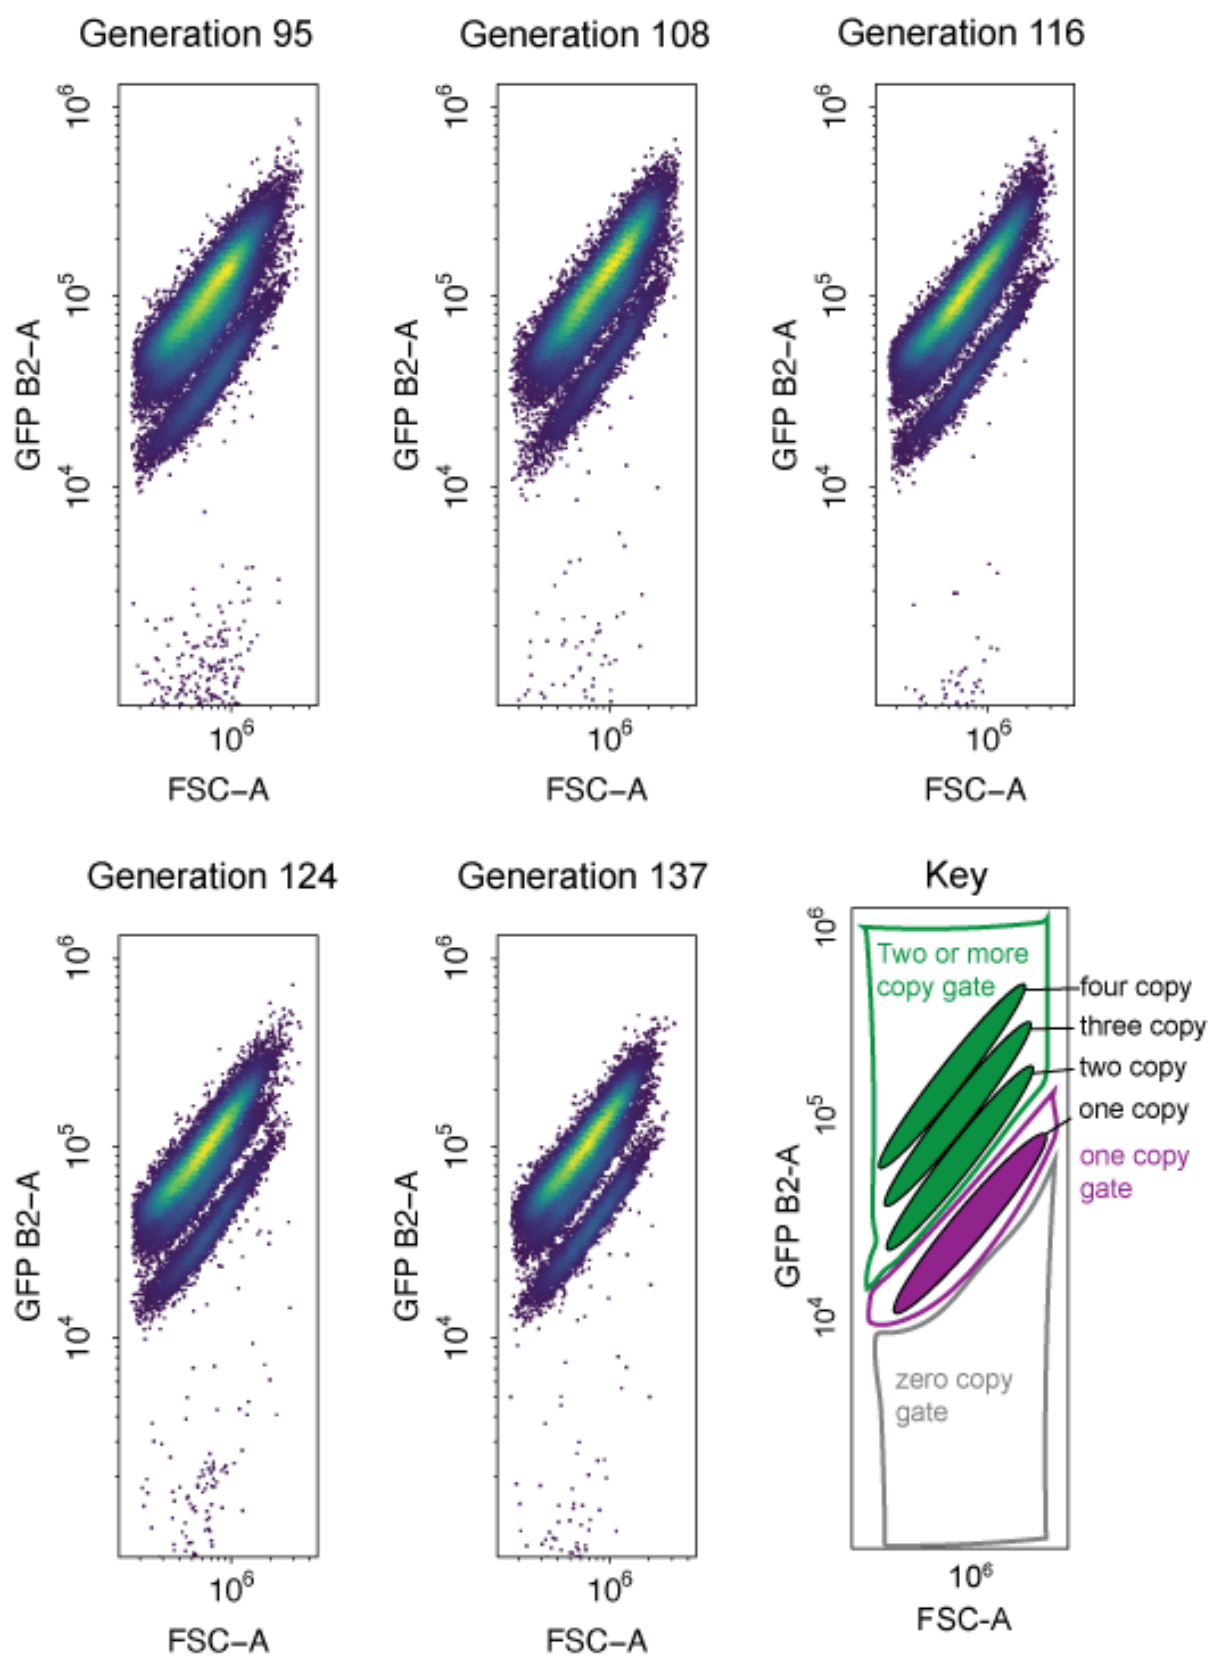

## ARS $\Delta$ population 7

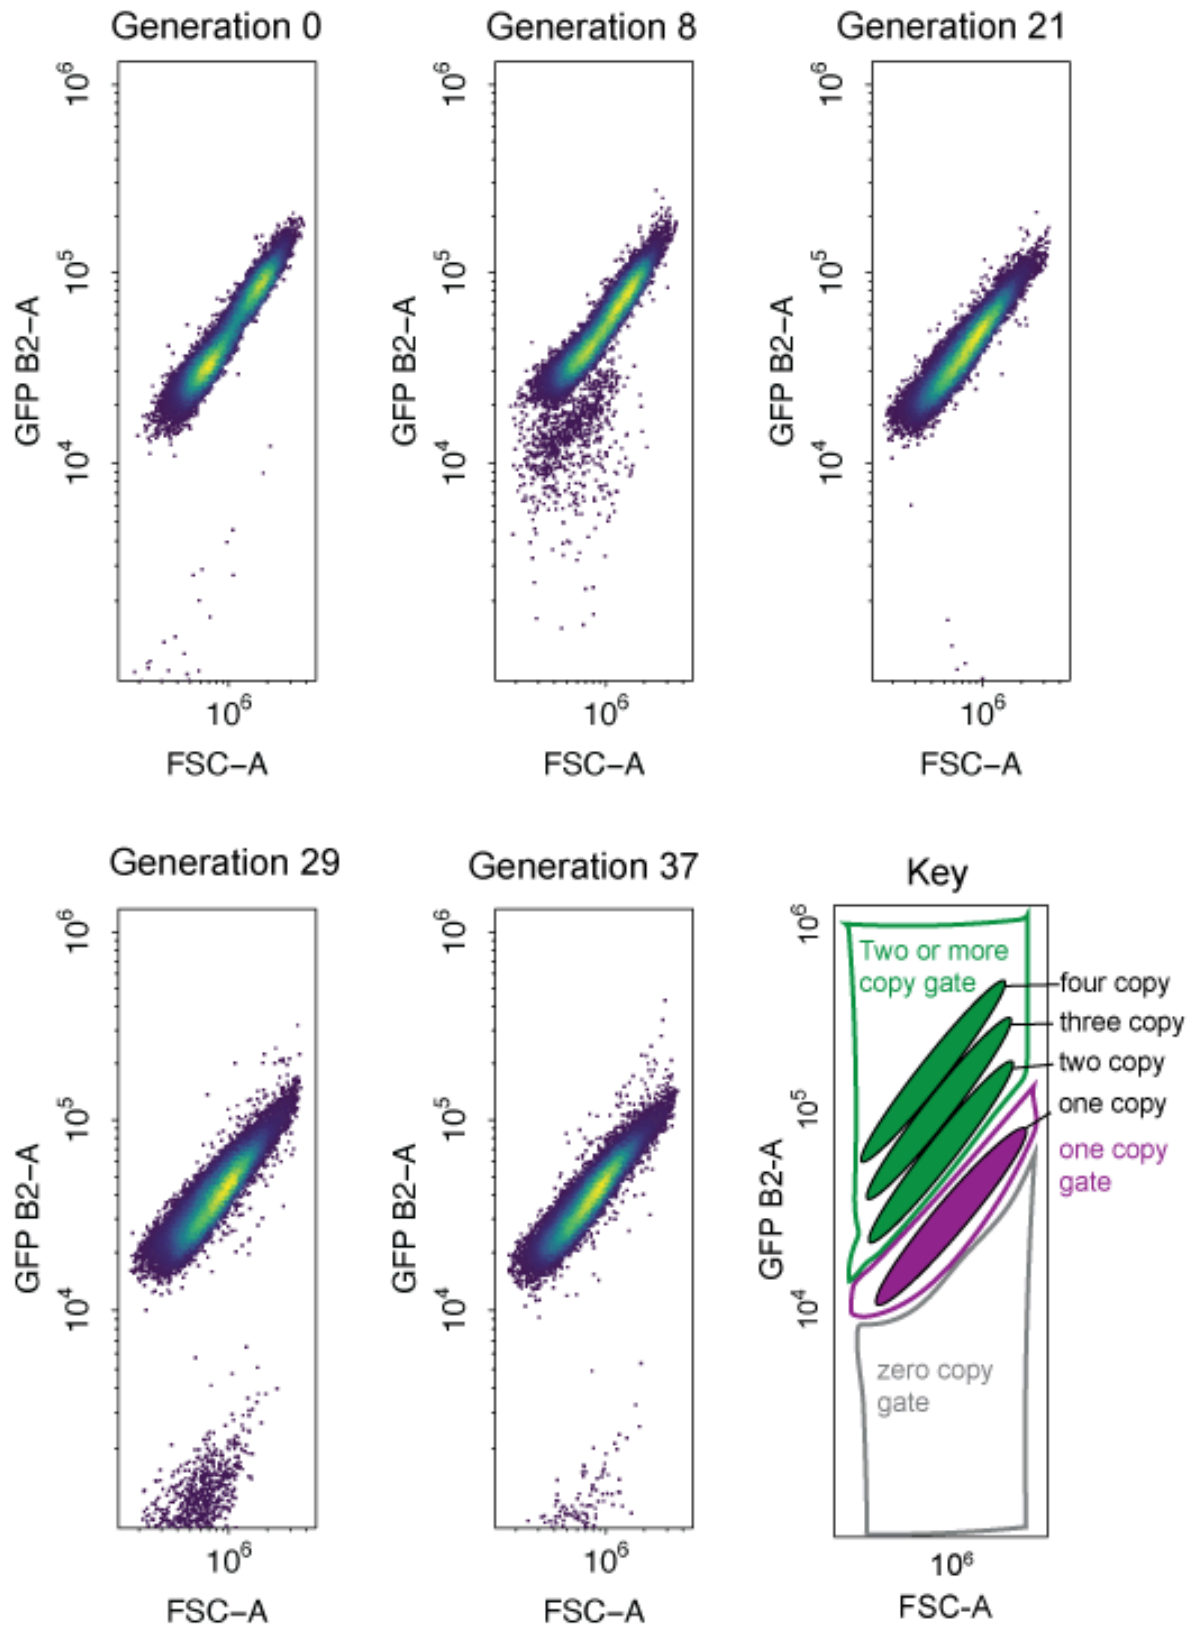

## ARS $\Delta$ population 7

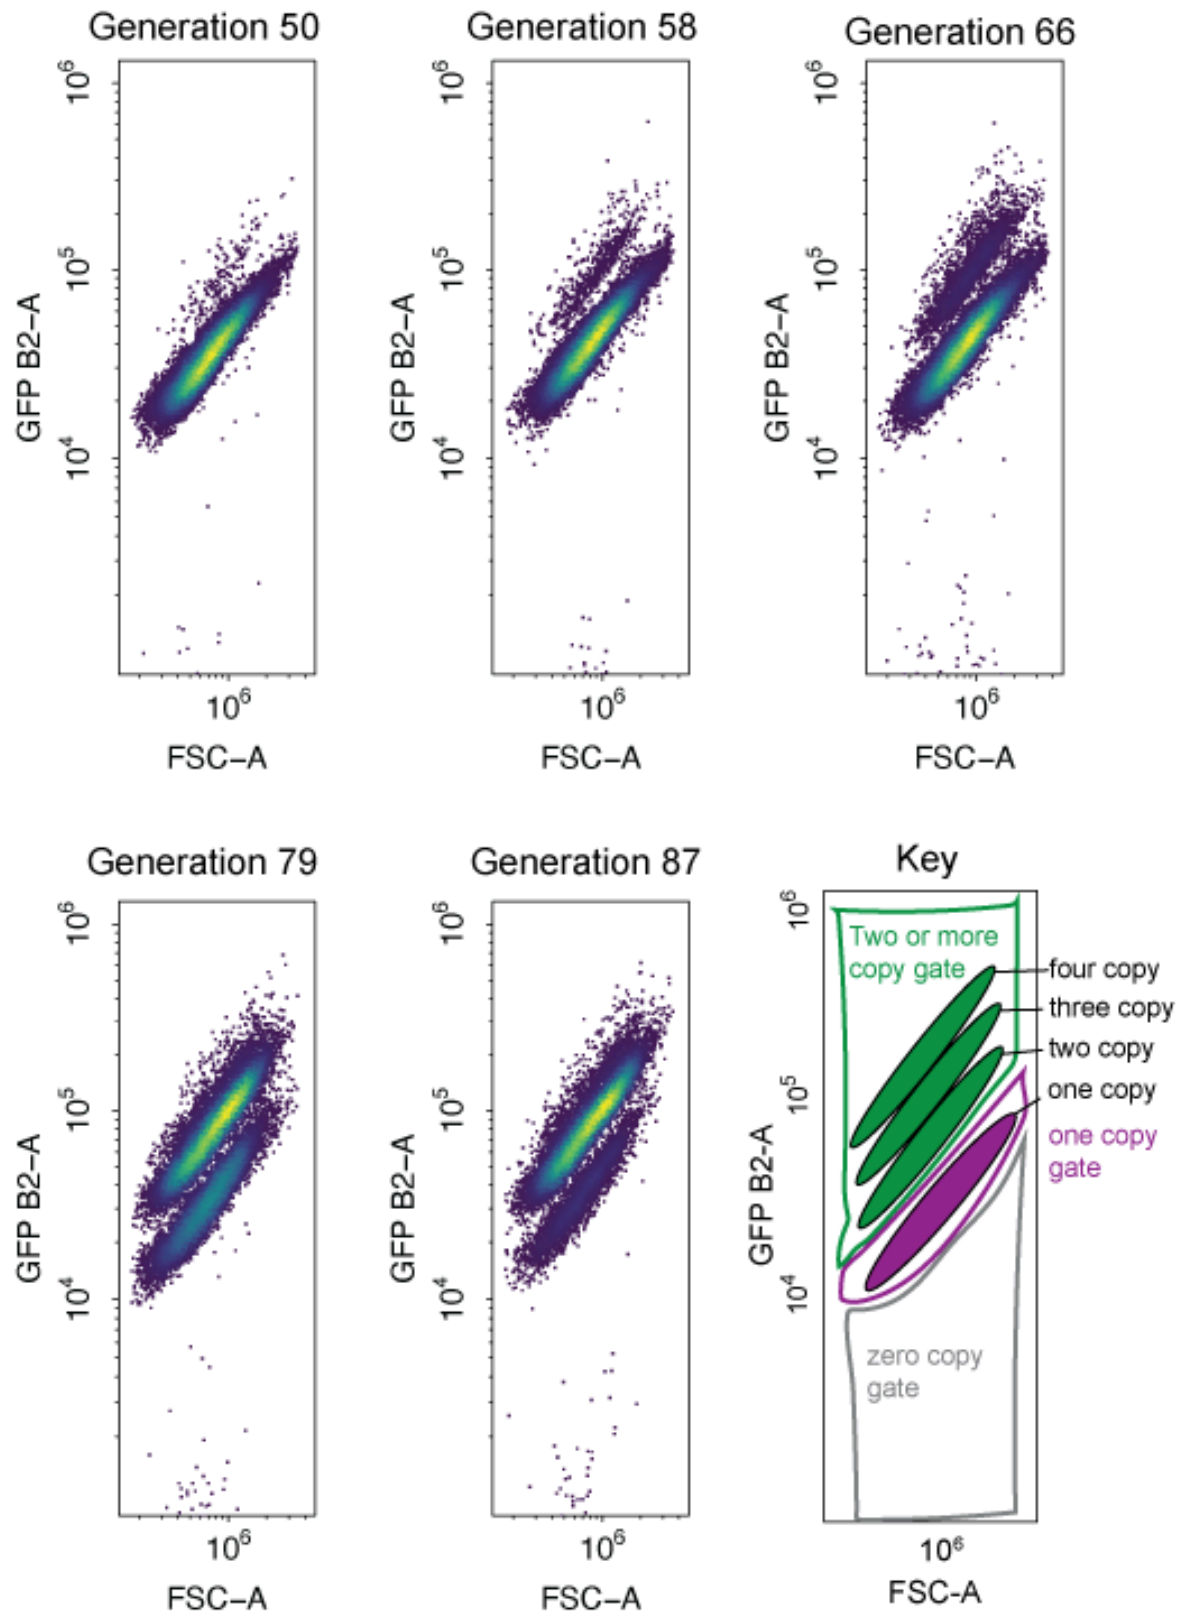

## ARS $\Delta$ population 7

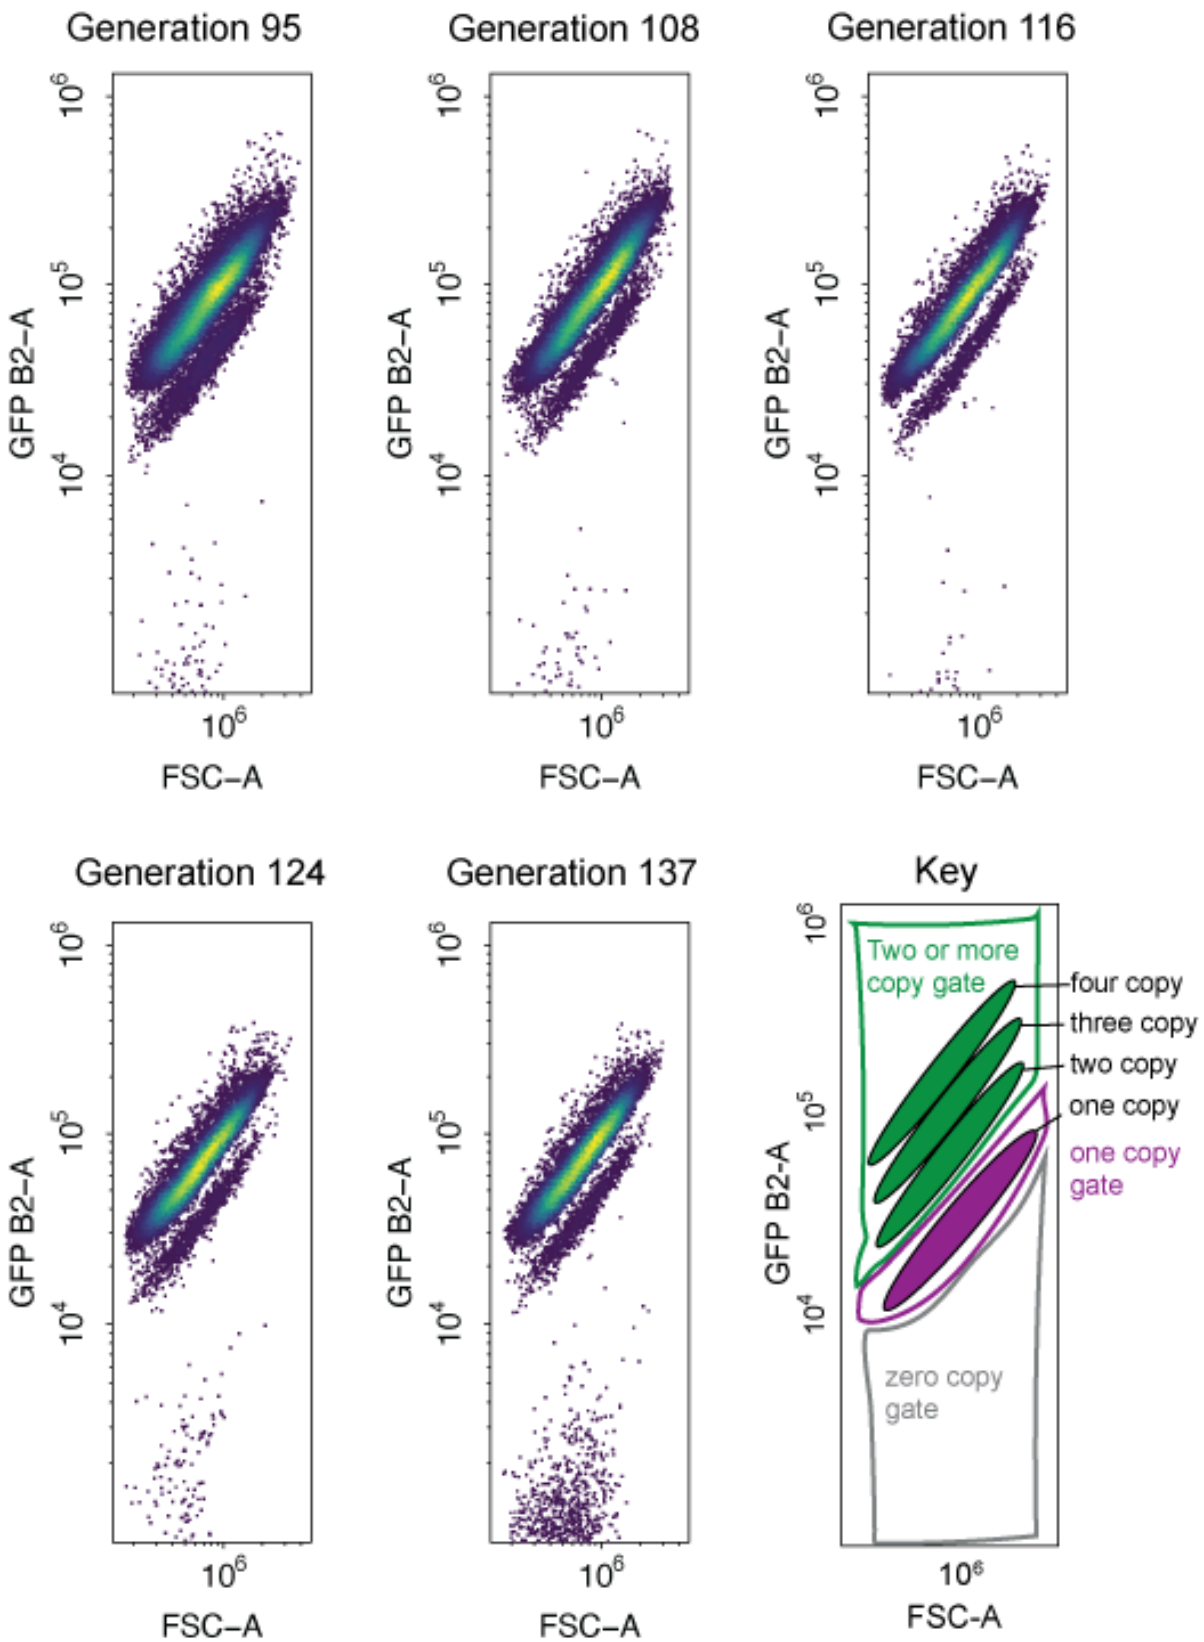

## ARS $\Delta$ population 8

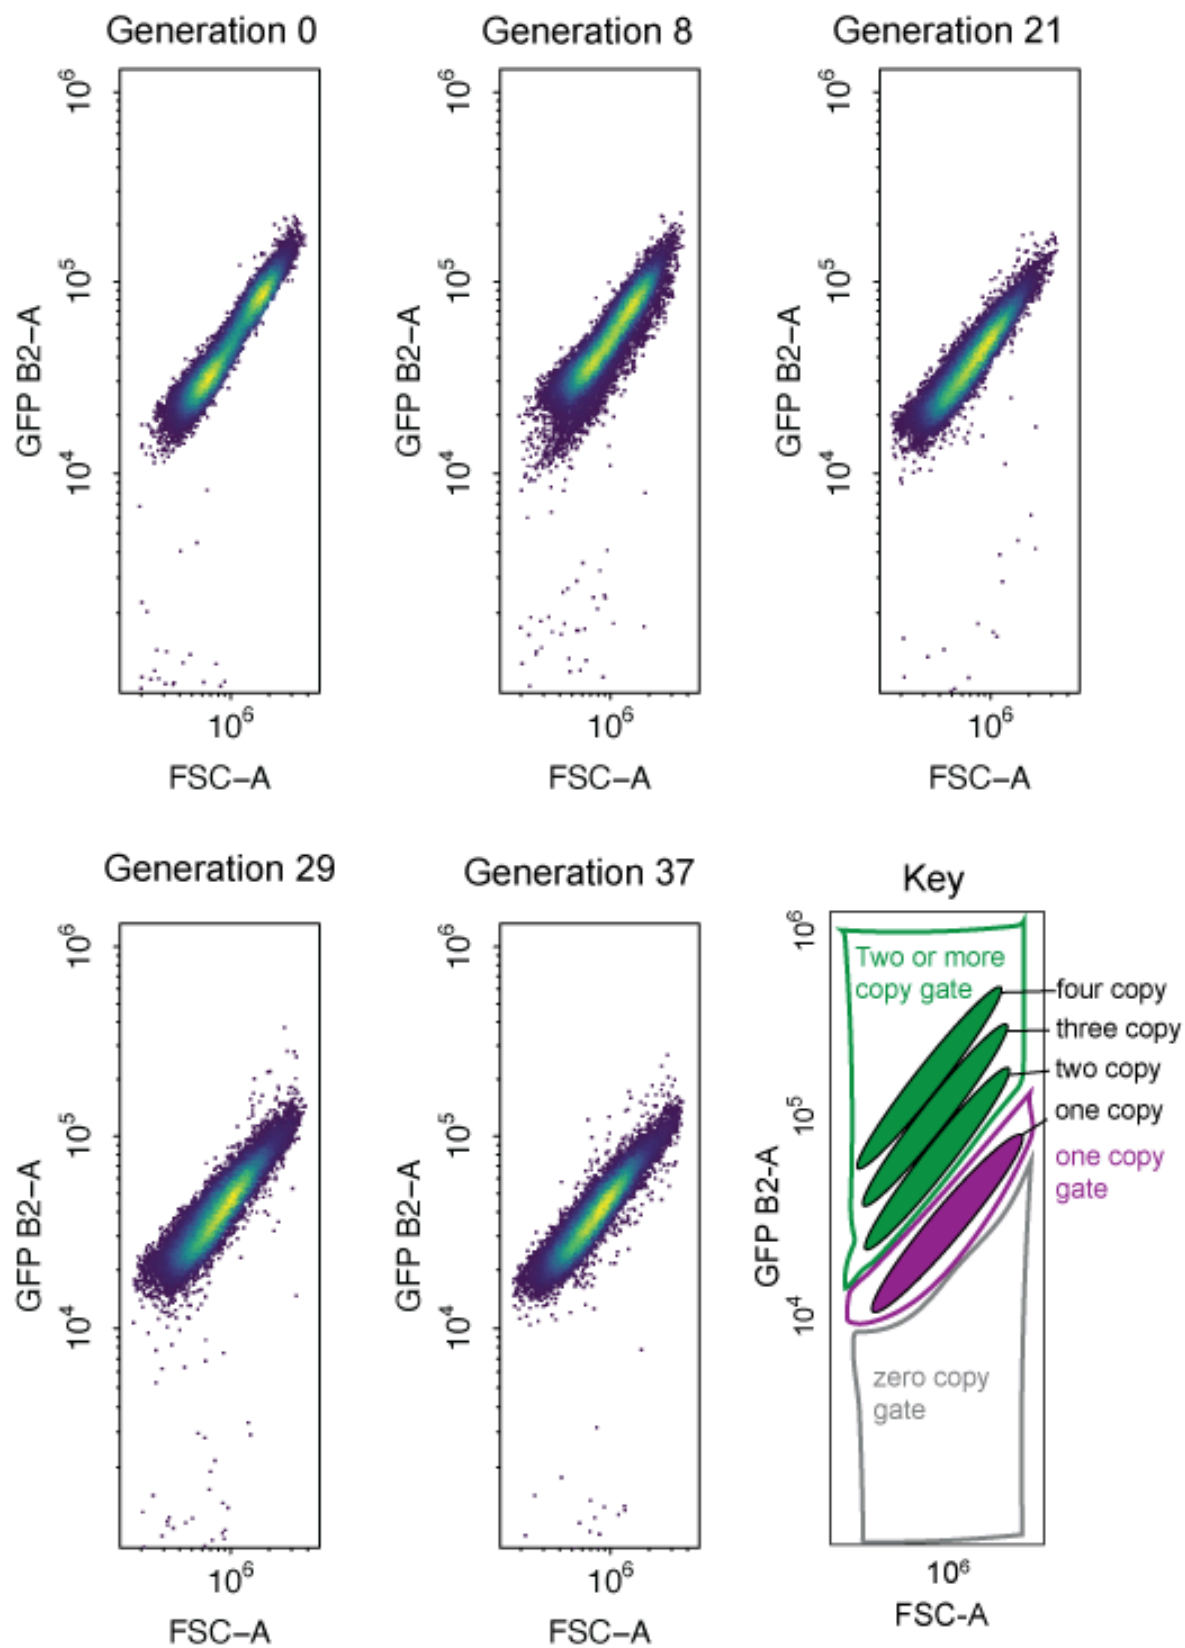

## ARS $\Delta$ population 8

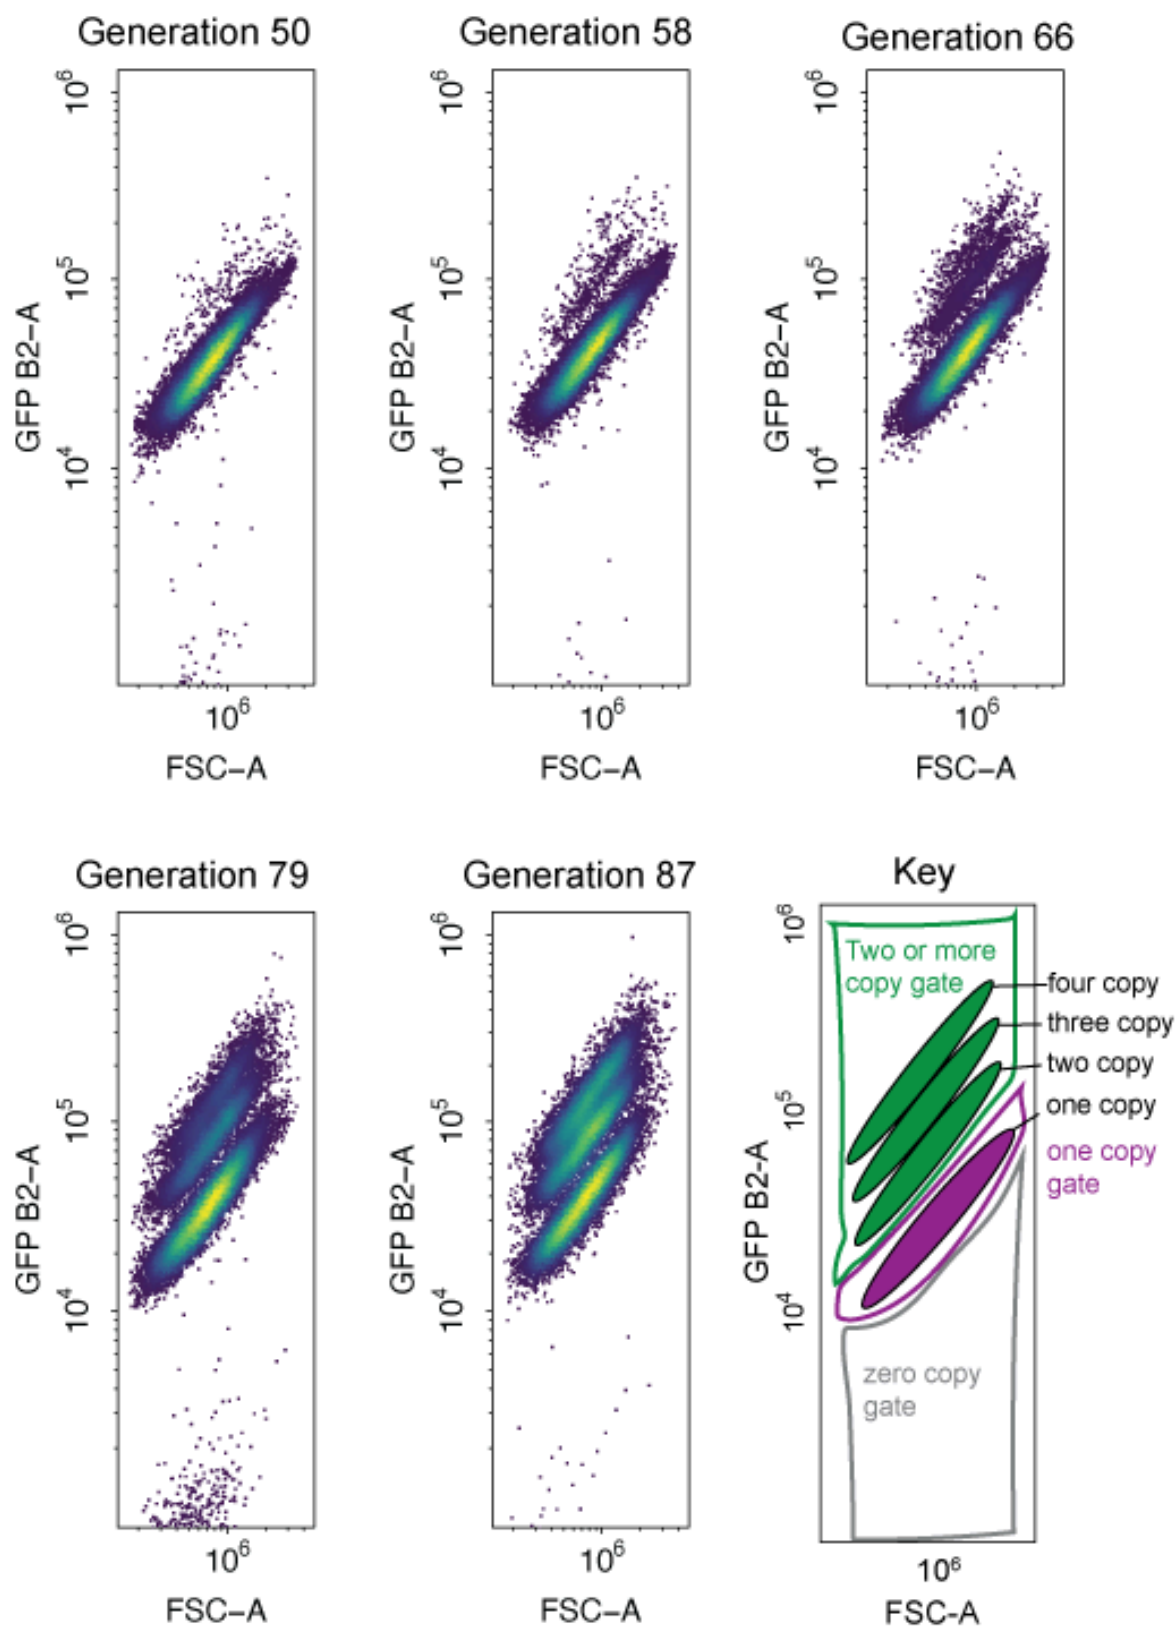



## ARS $\Delta$ population 8

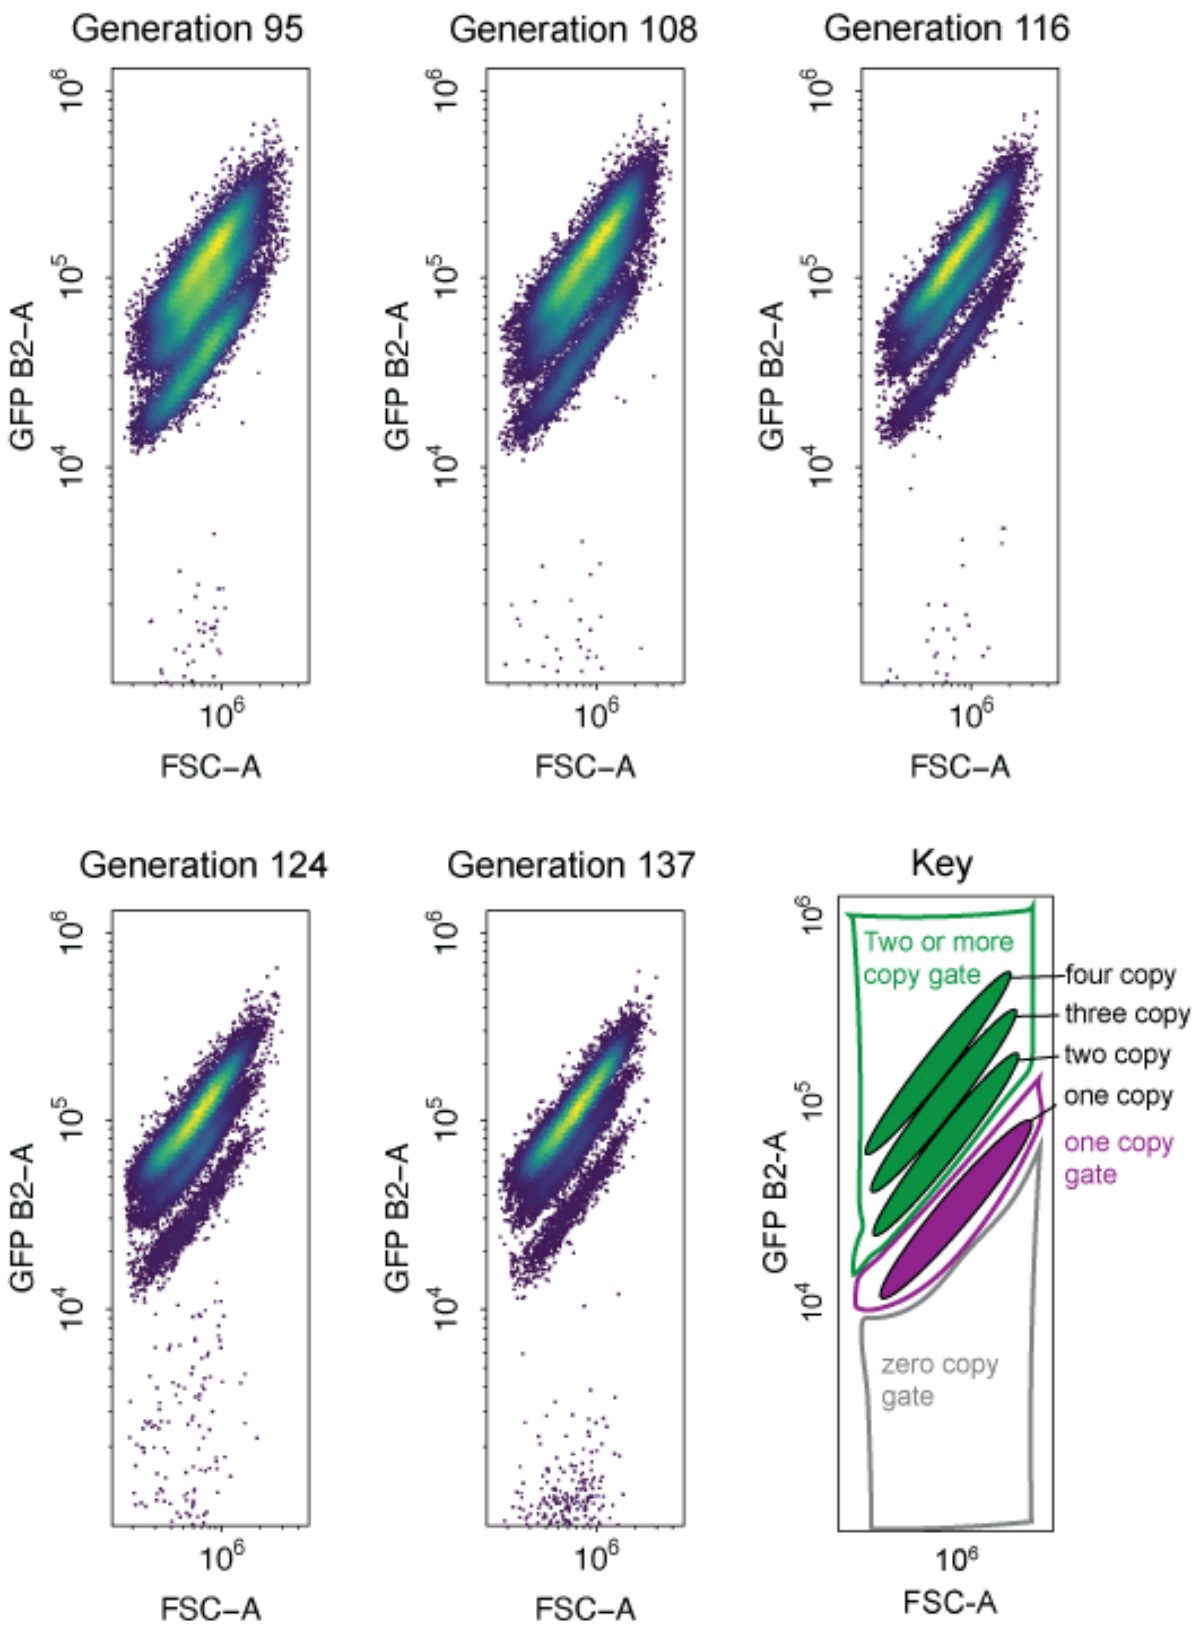

## ALL $\Delta$ population 1

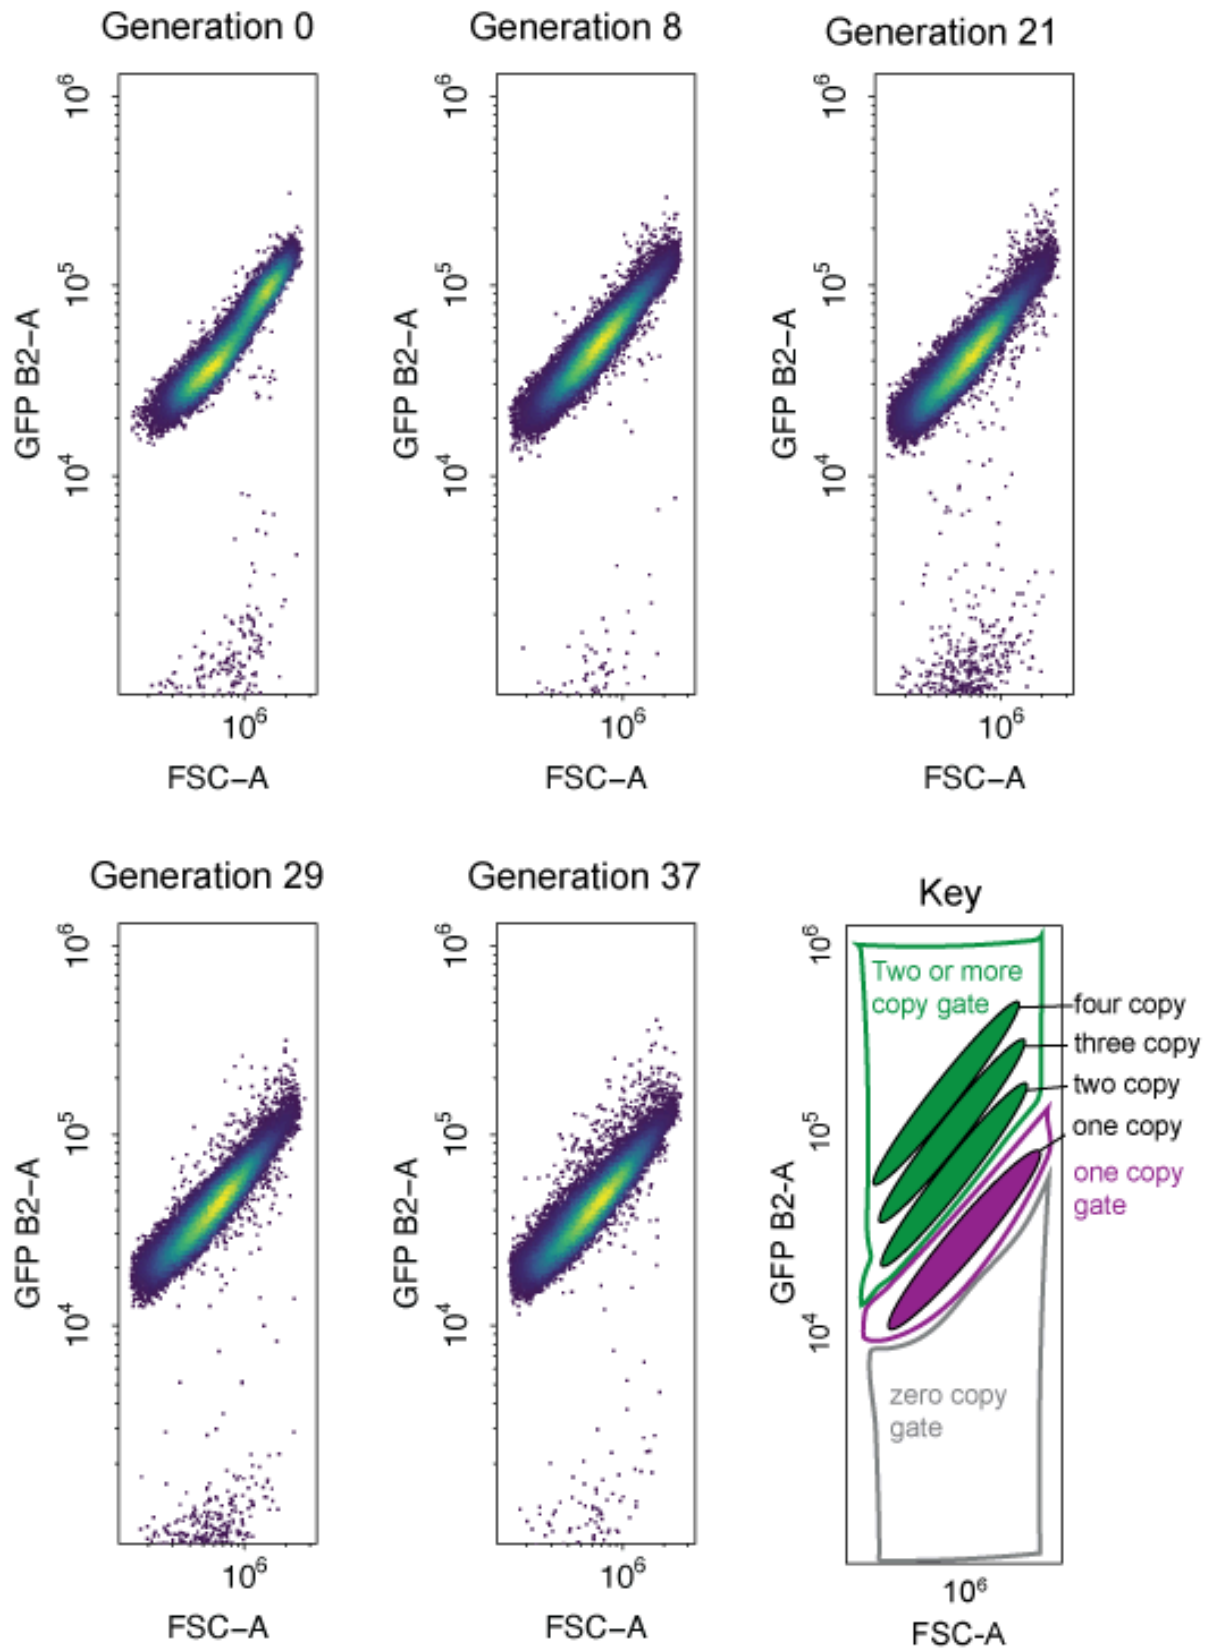

## ALL $\Delta$ population 1

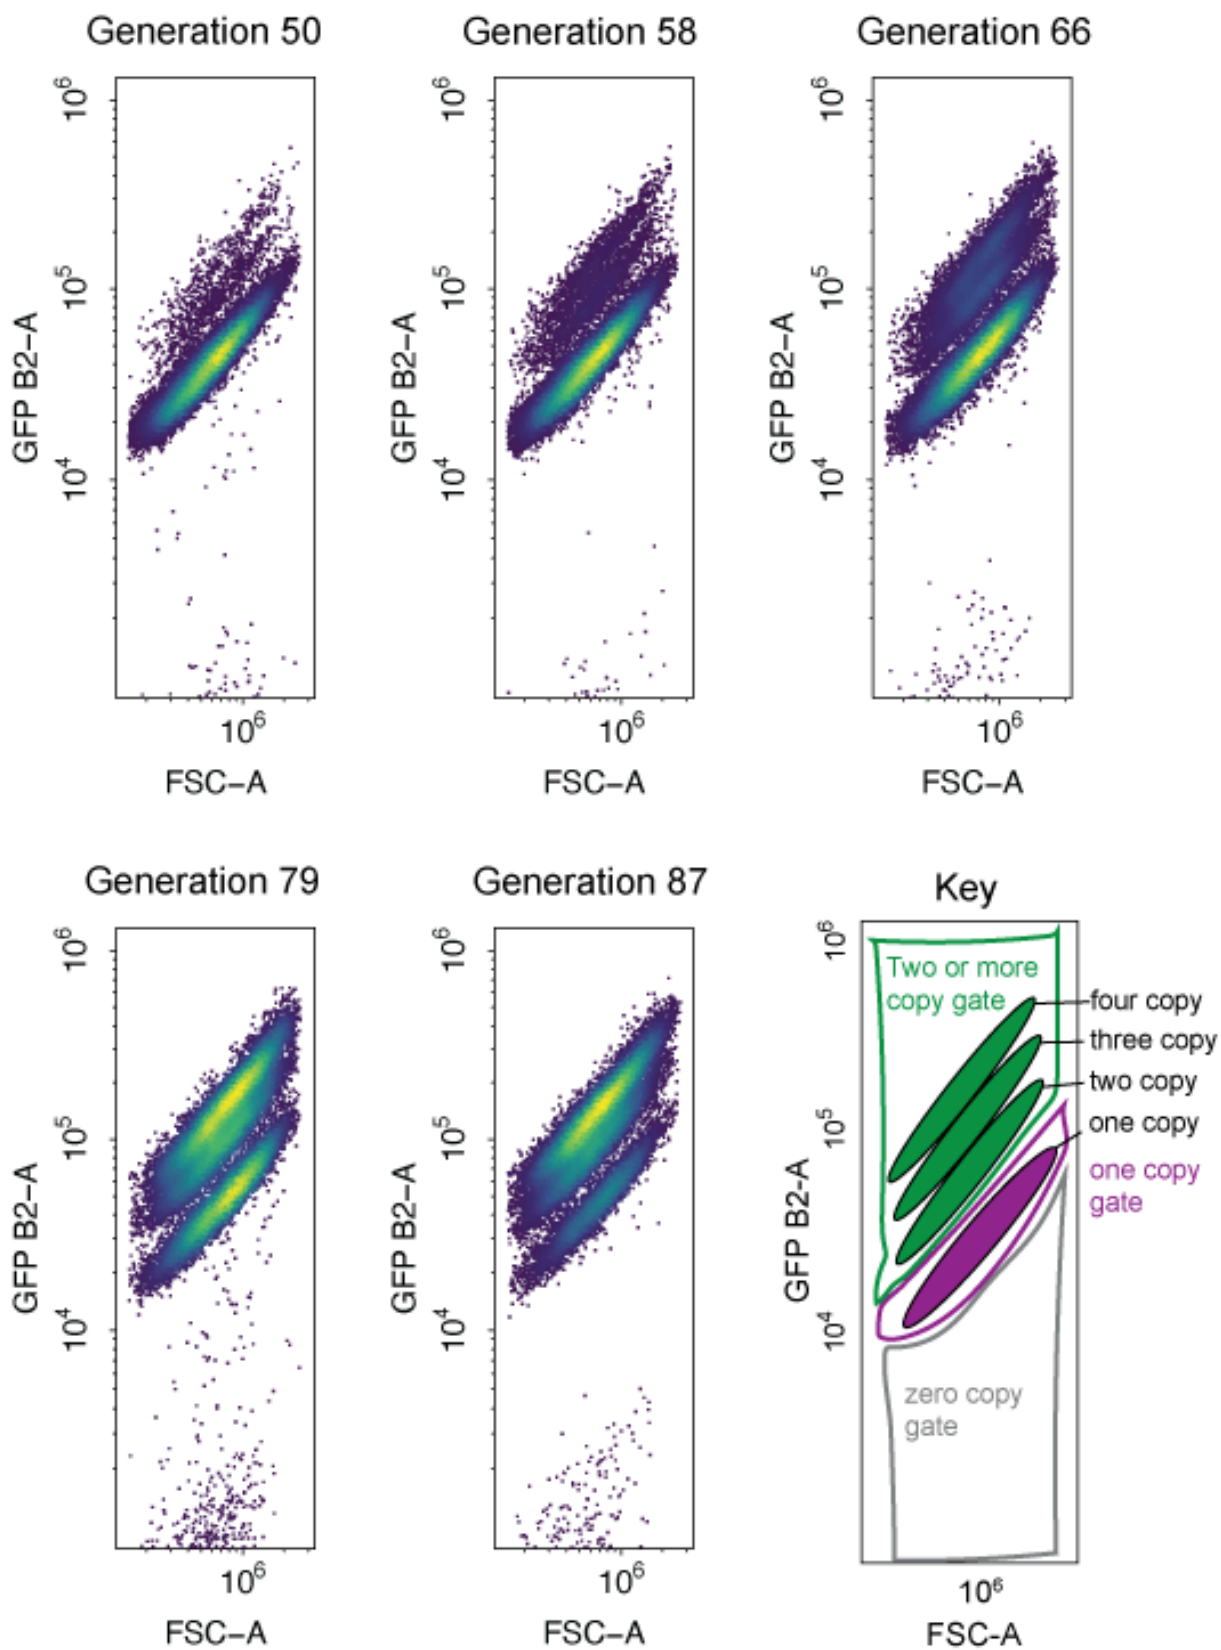

## ALL $\Delta$ population 1

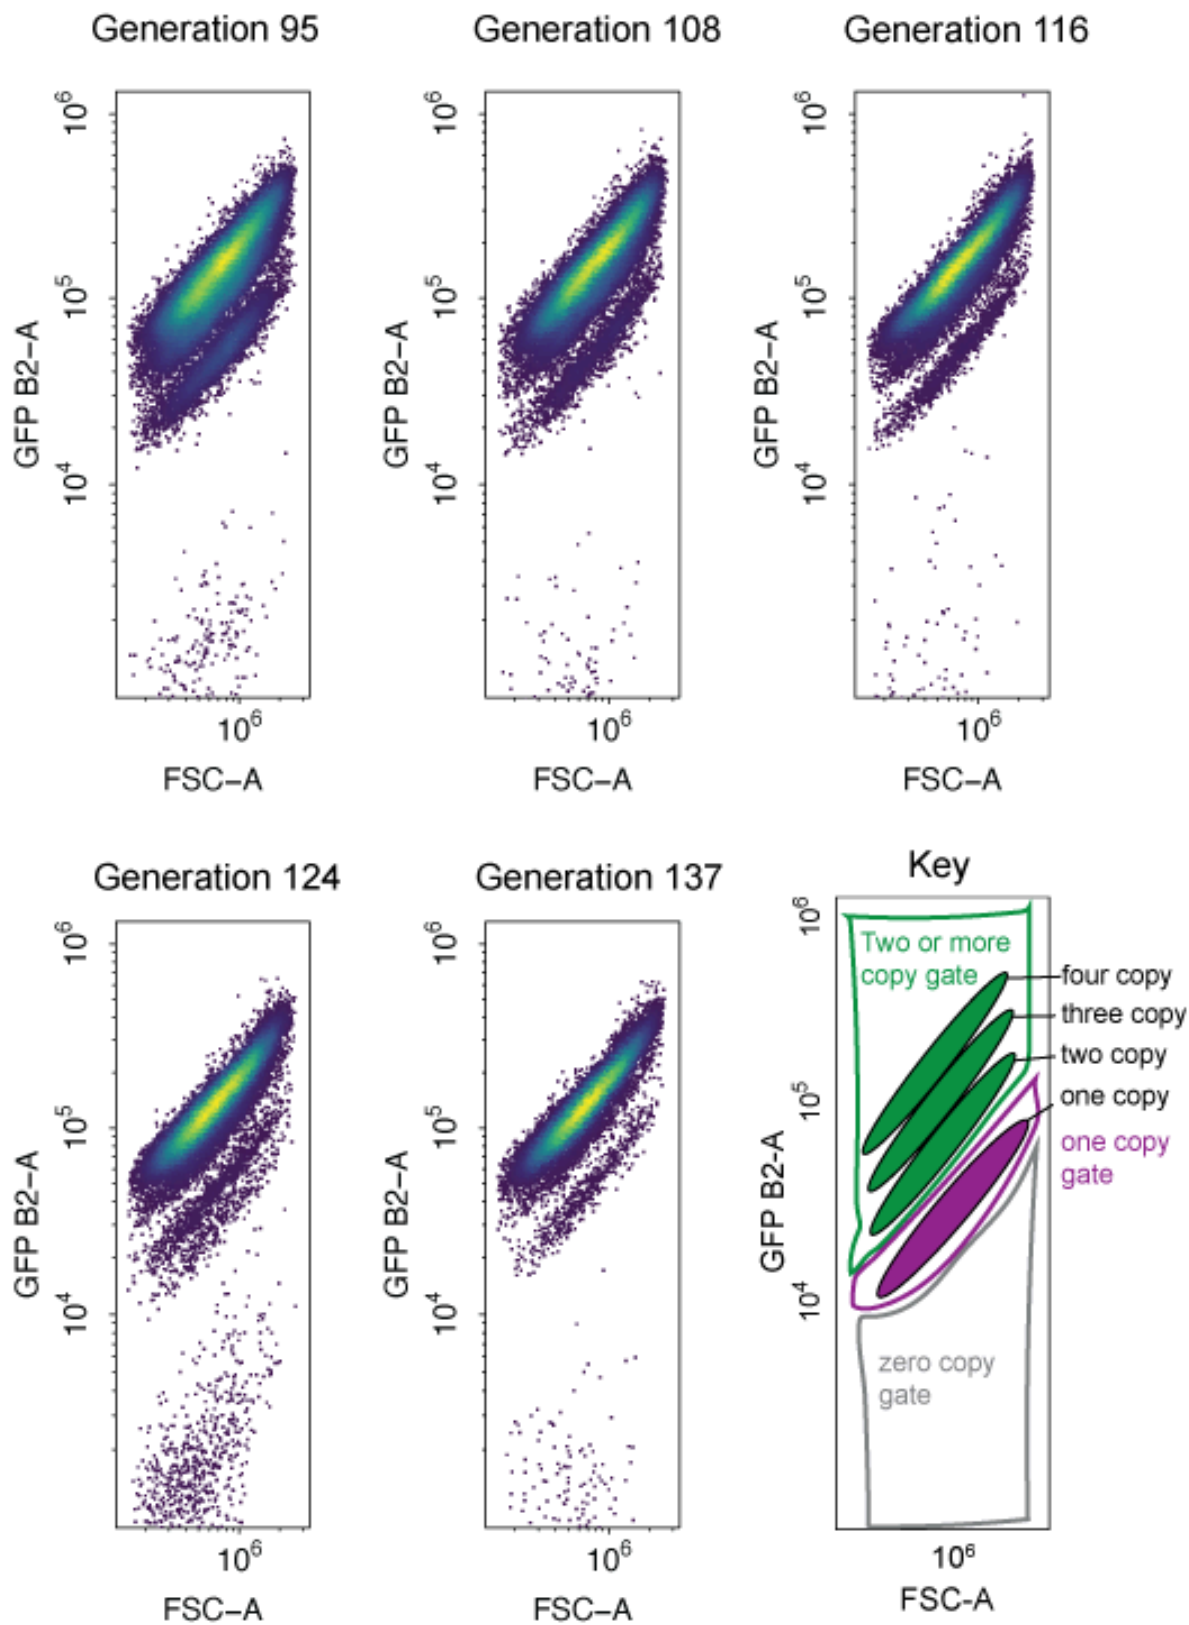

## ALL $\Delta$ population 2

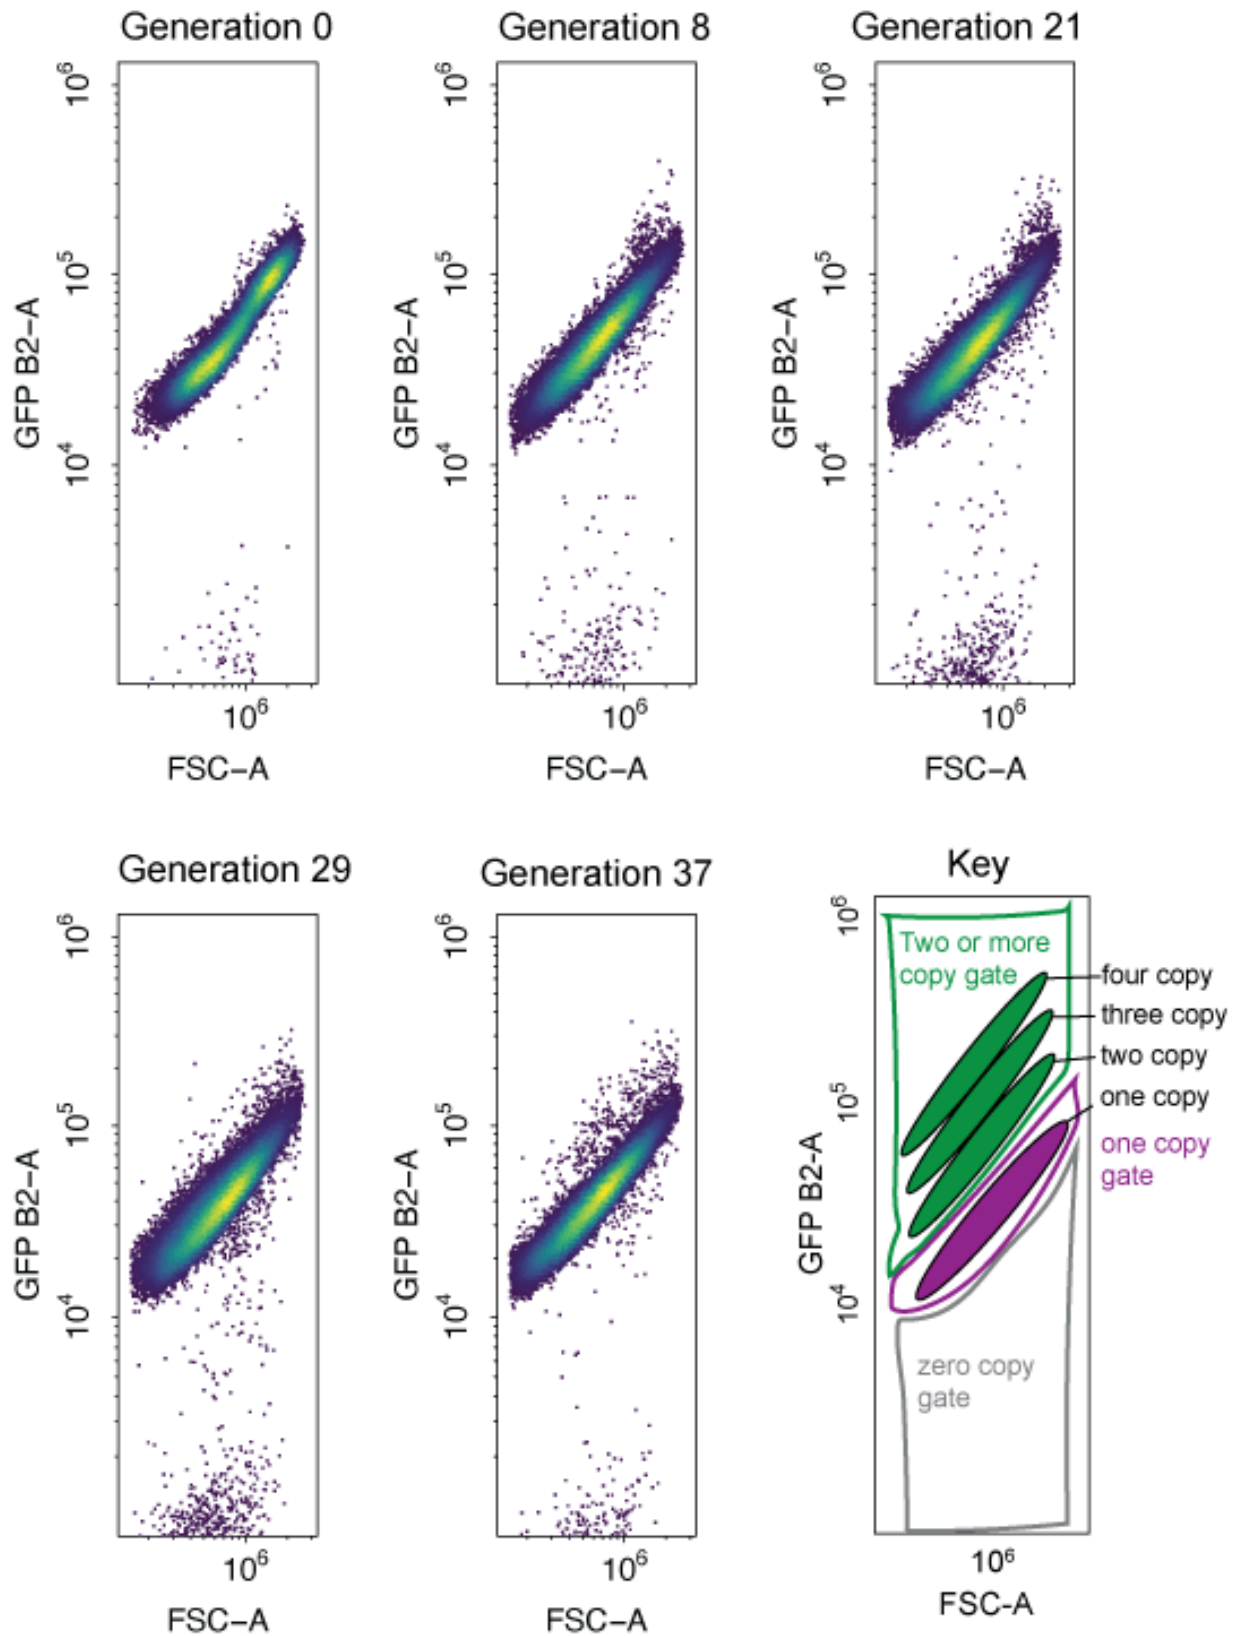

## ALL $\Delta$ population 2

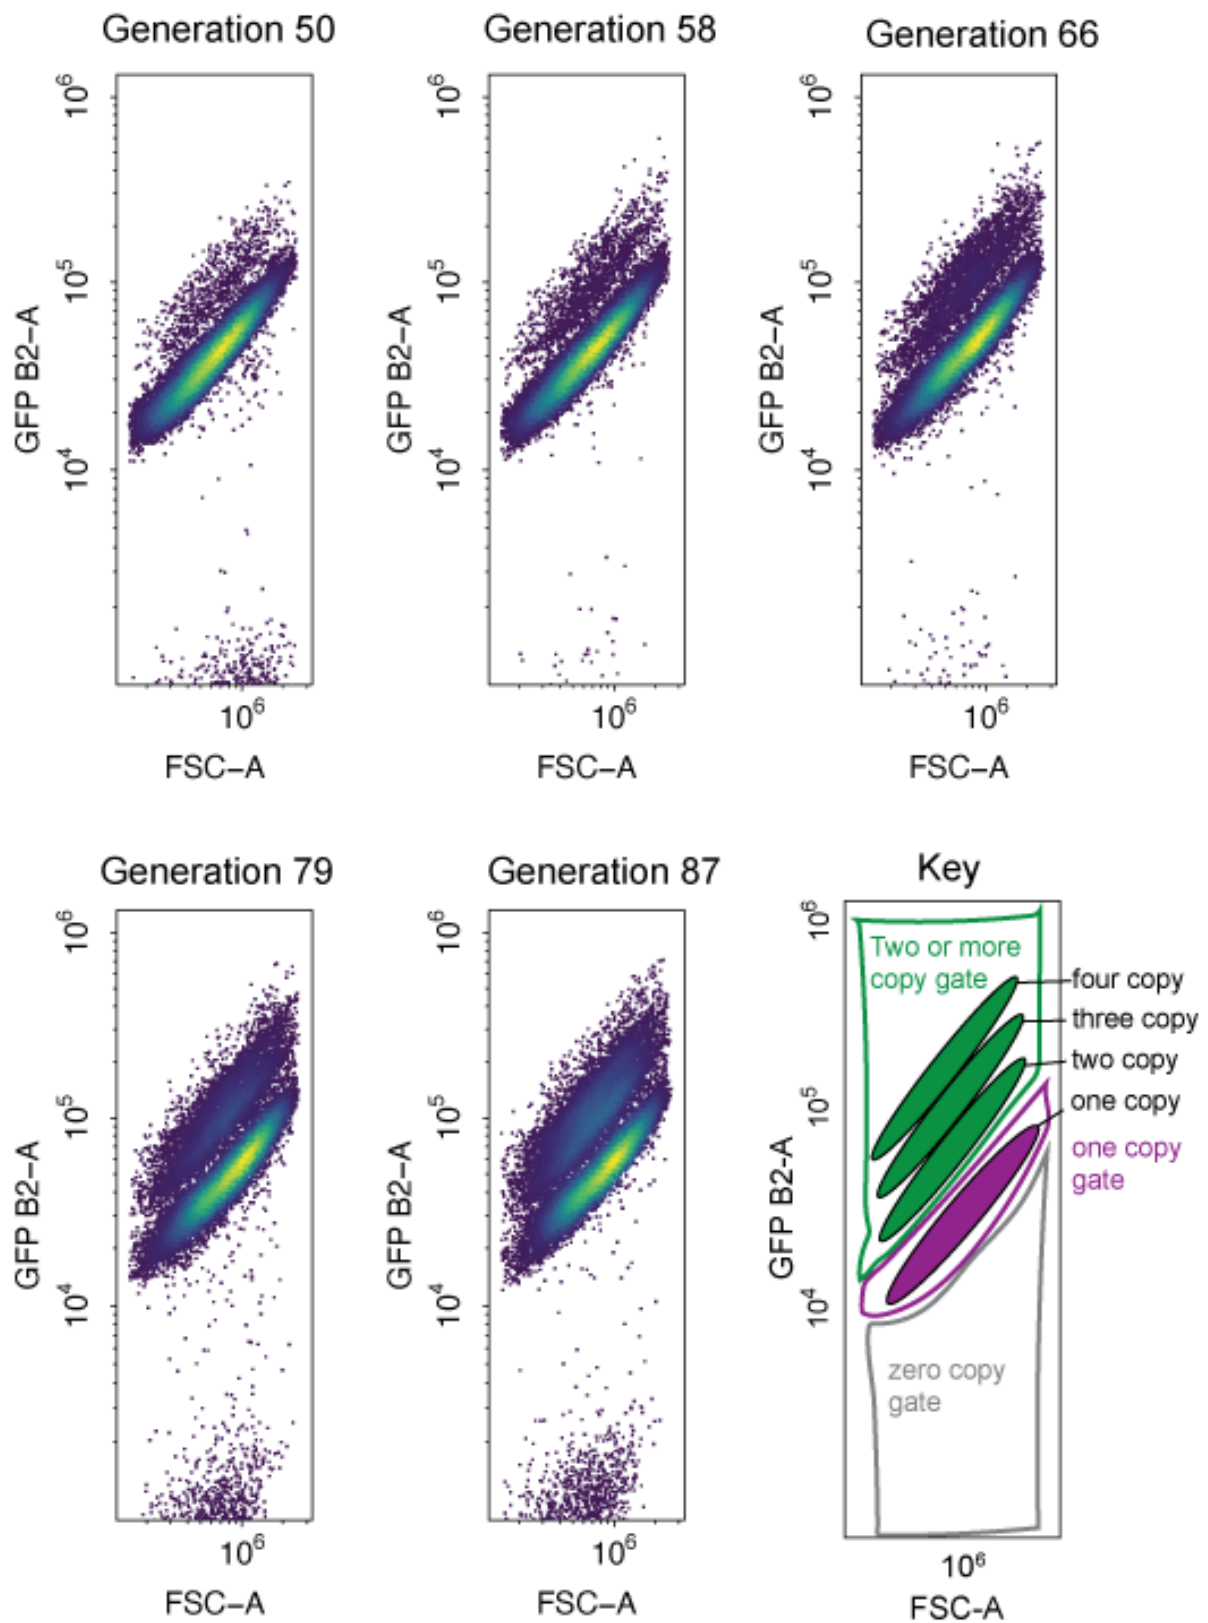

## ALL $\Delta$ population 2

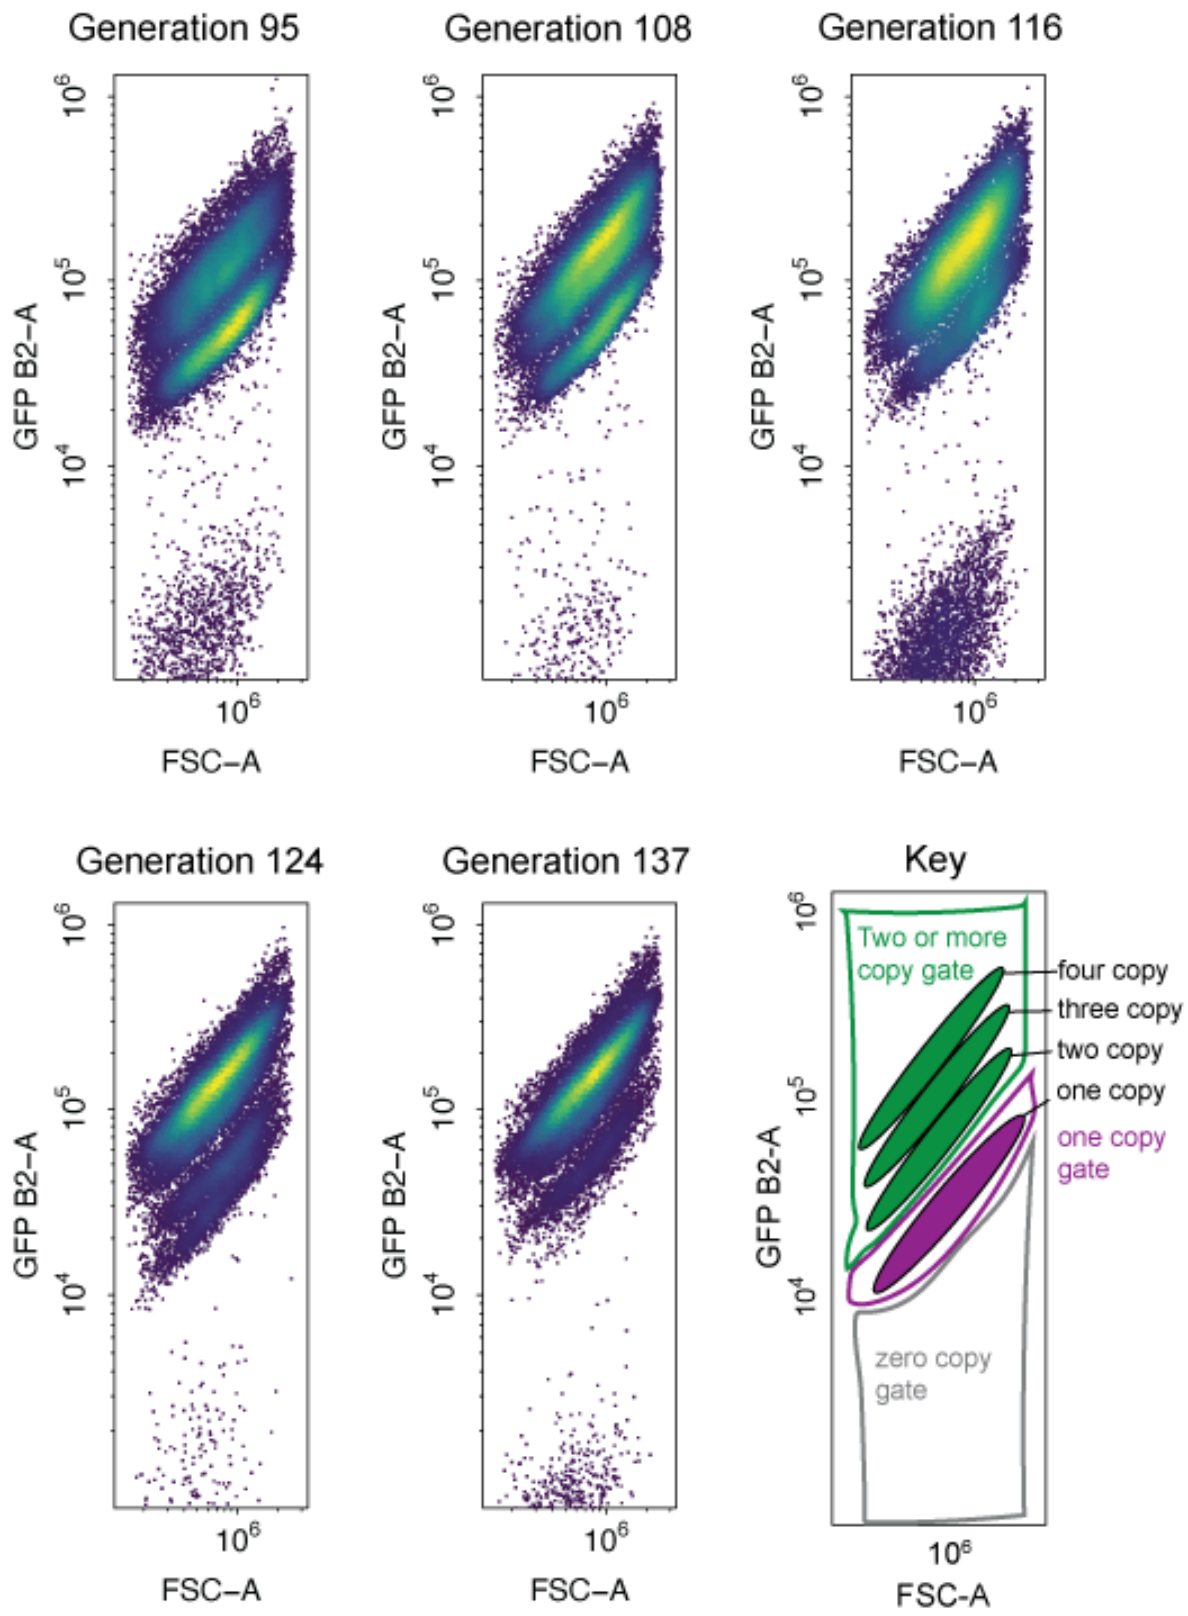

## ALL $\Delta$ population 3

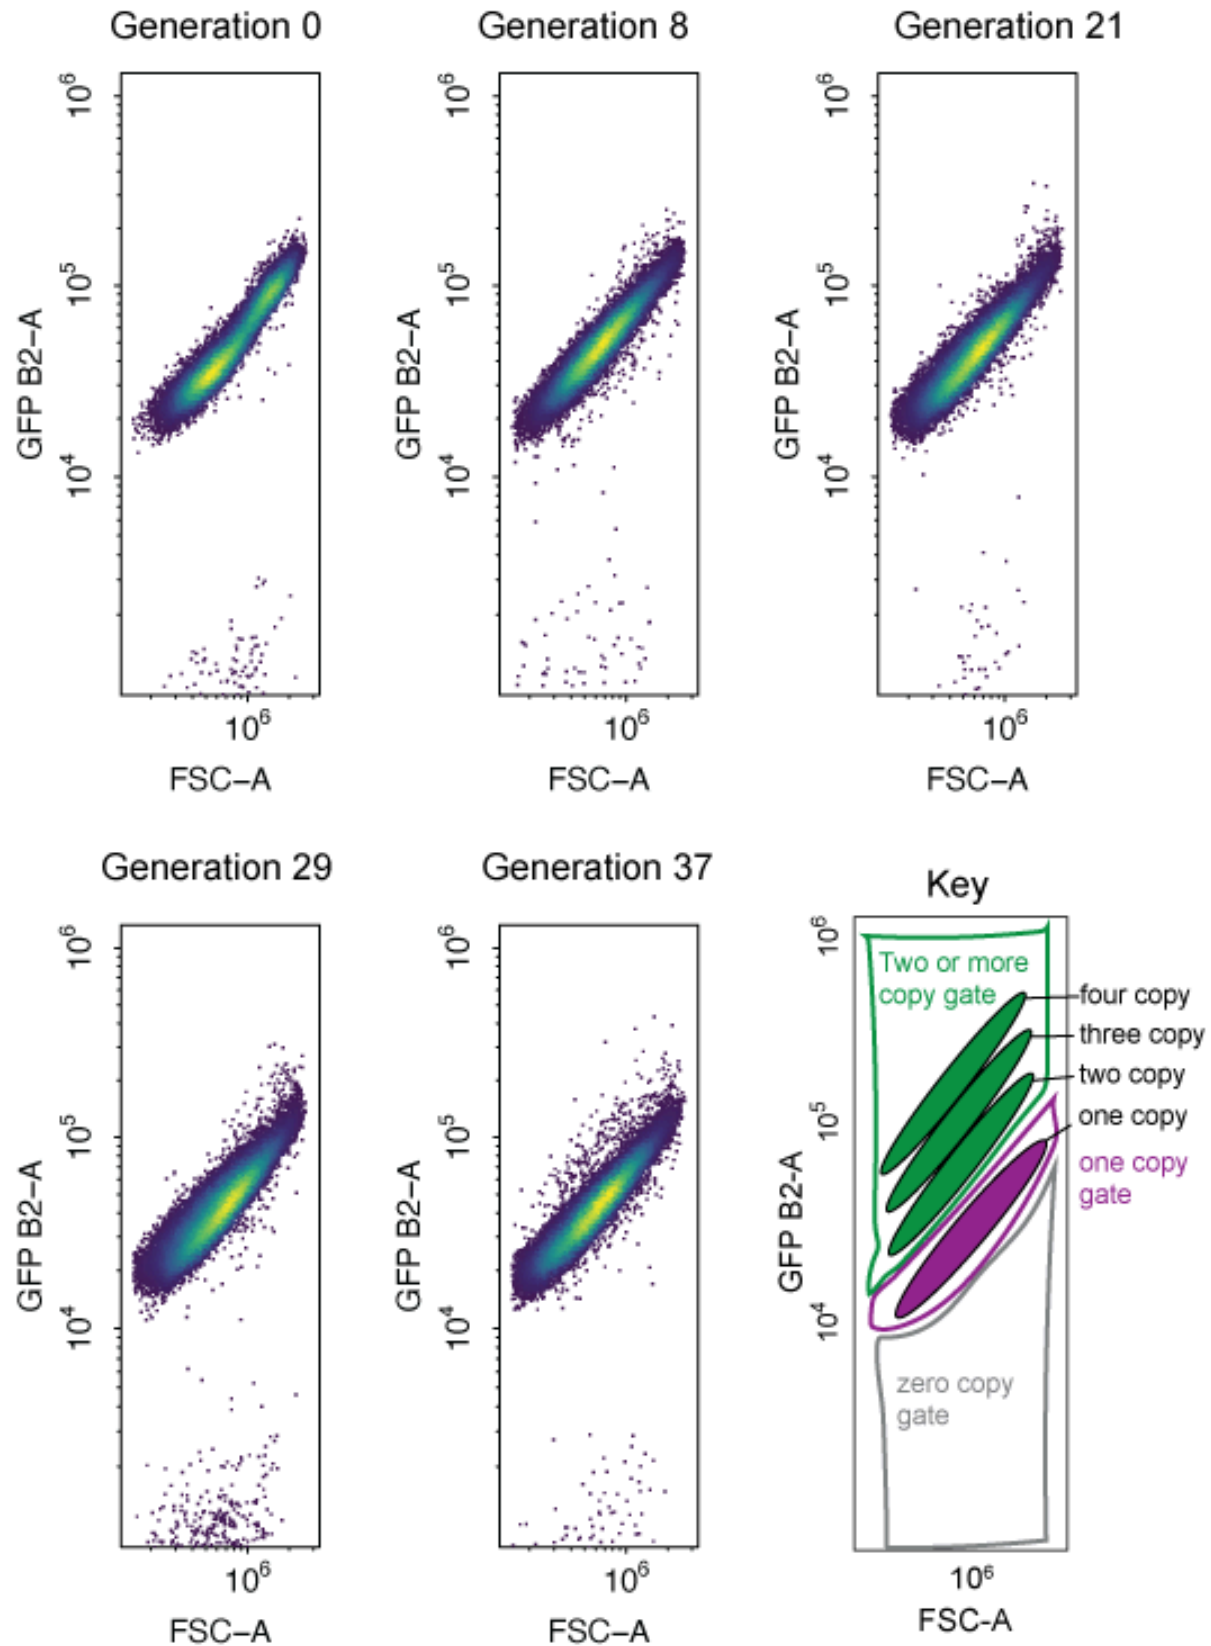



## ALL $\Delta$ population 3

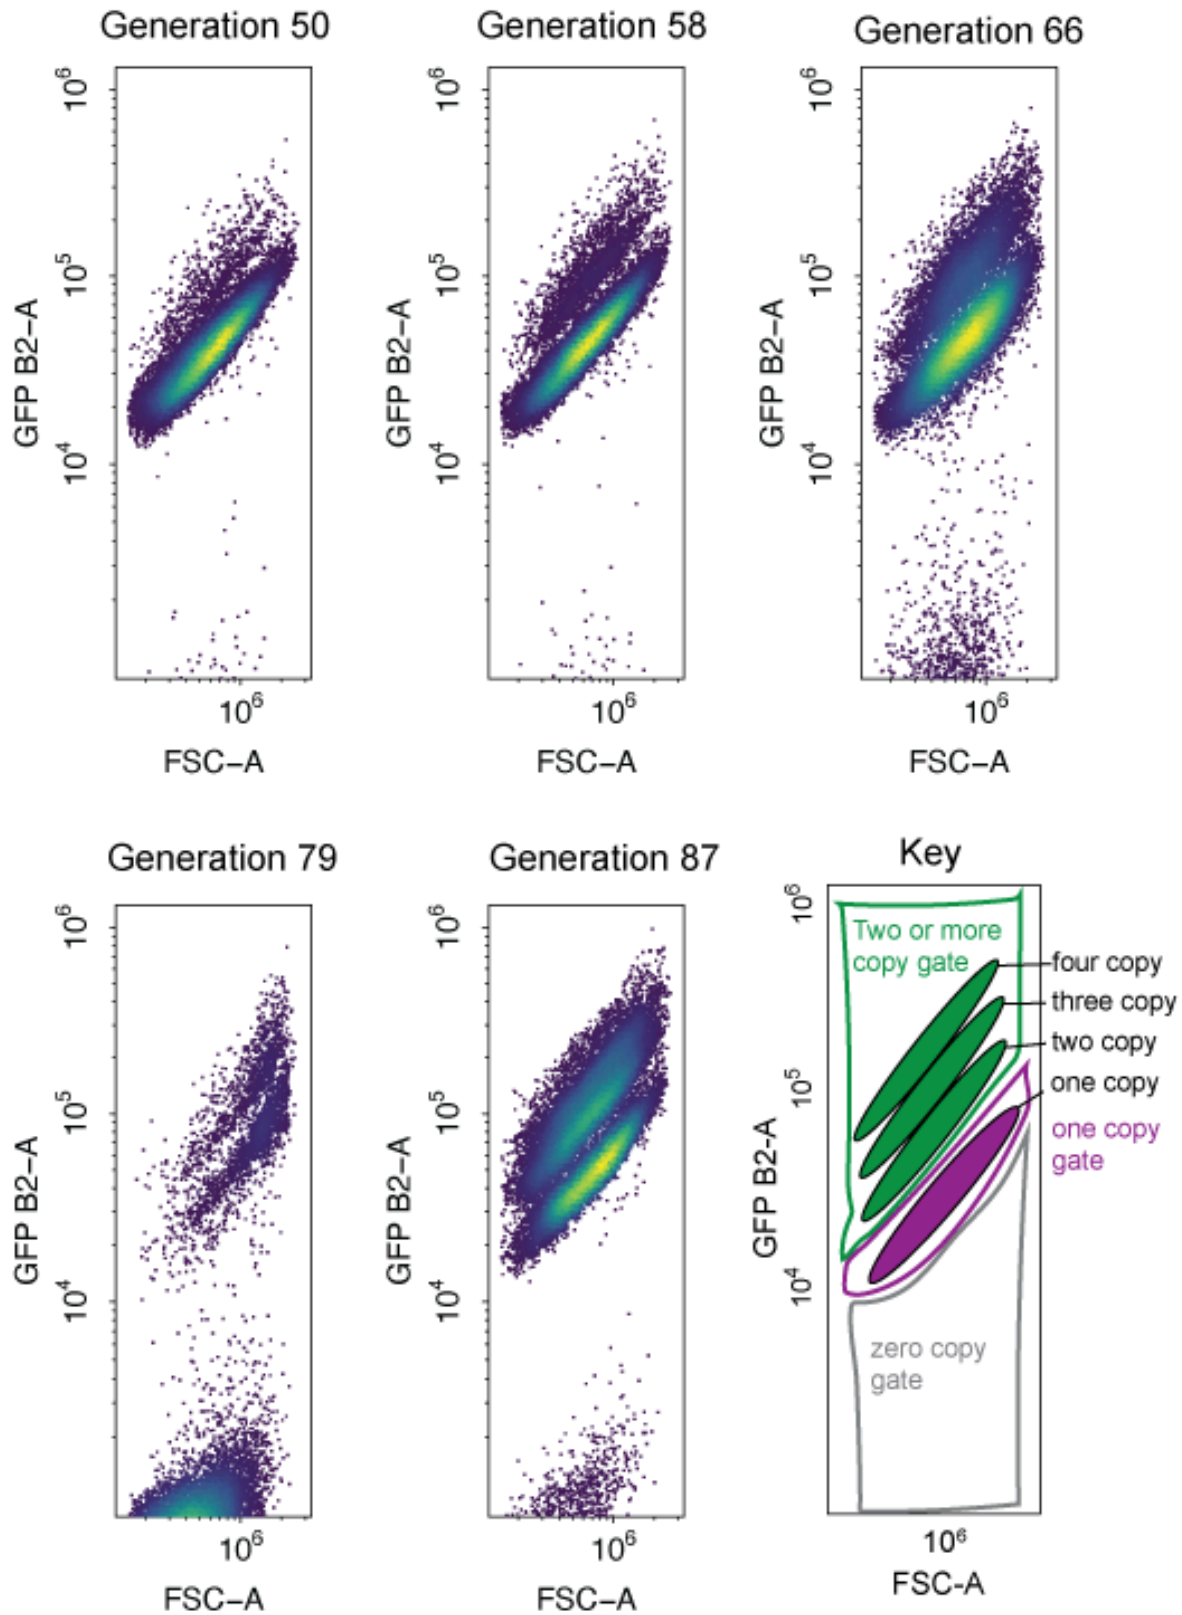

## ALL $\Delta$ population 3

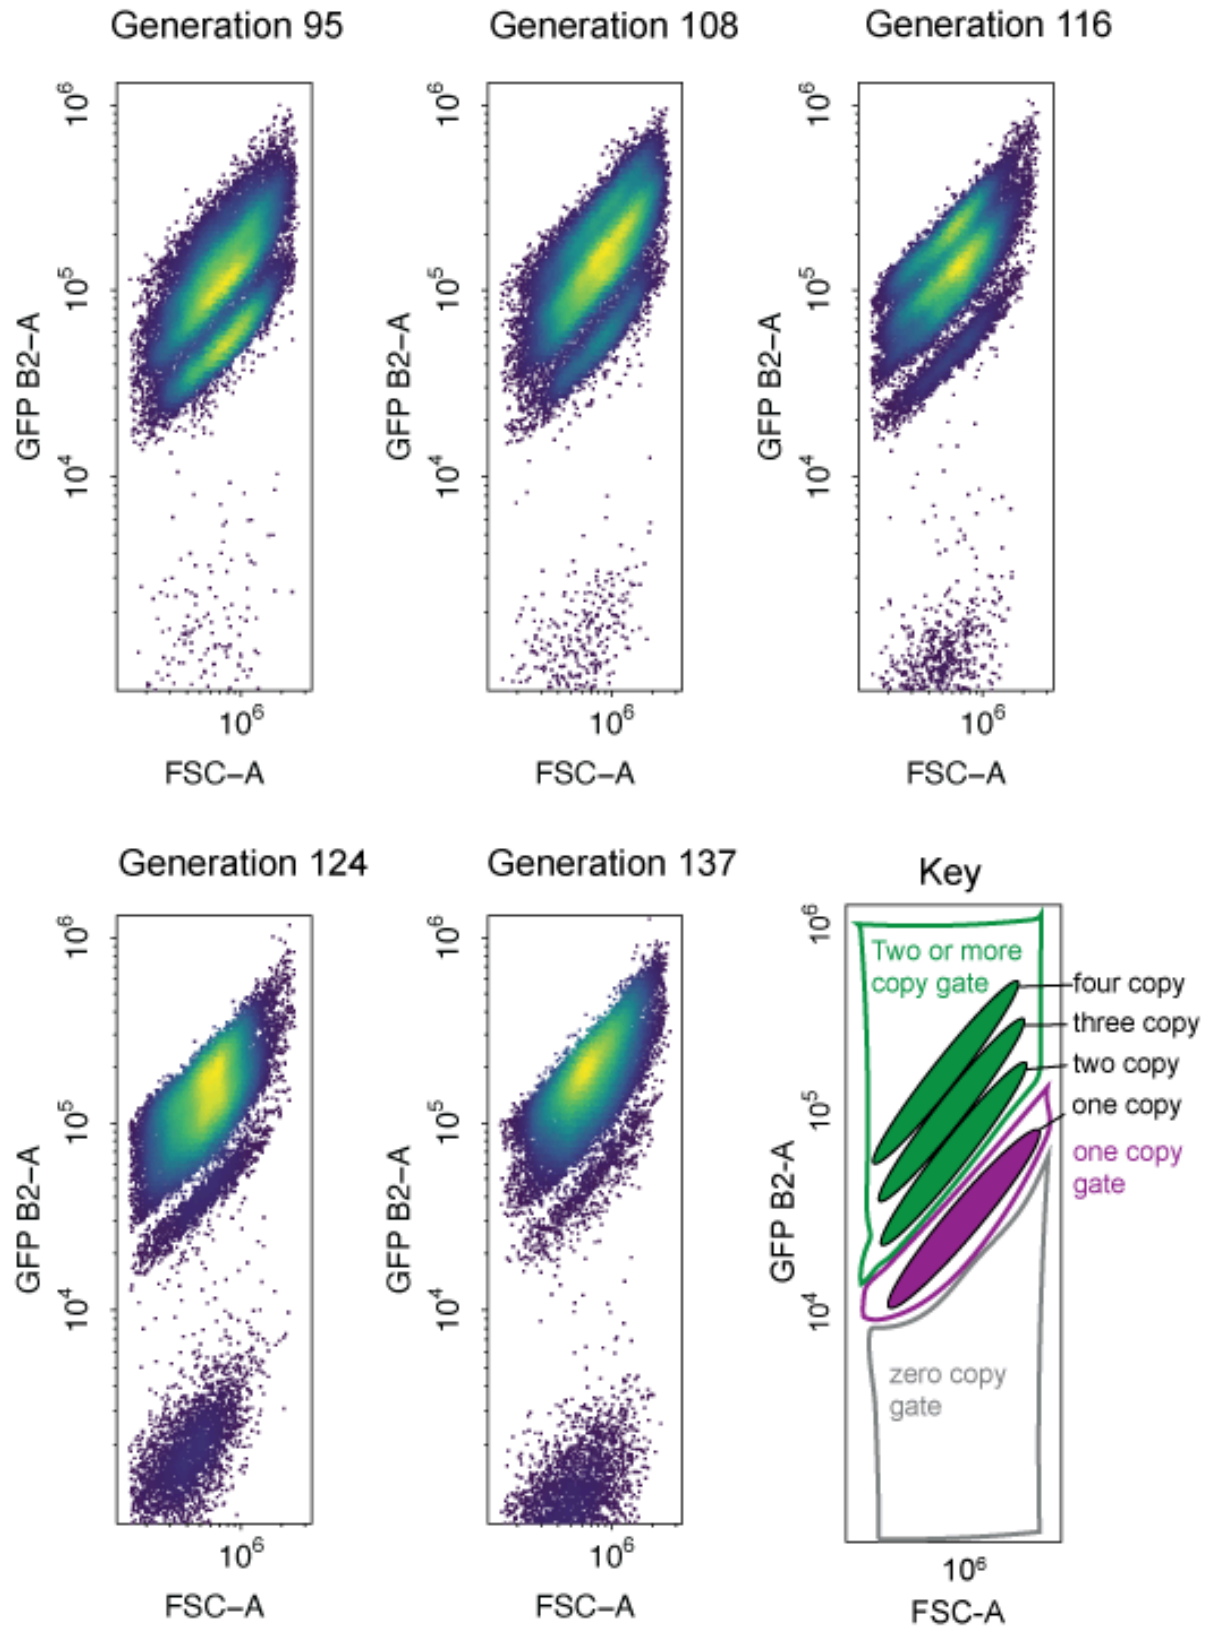

## ALL $\Delta$ population 4

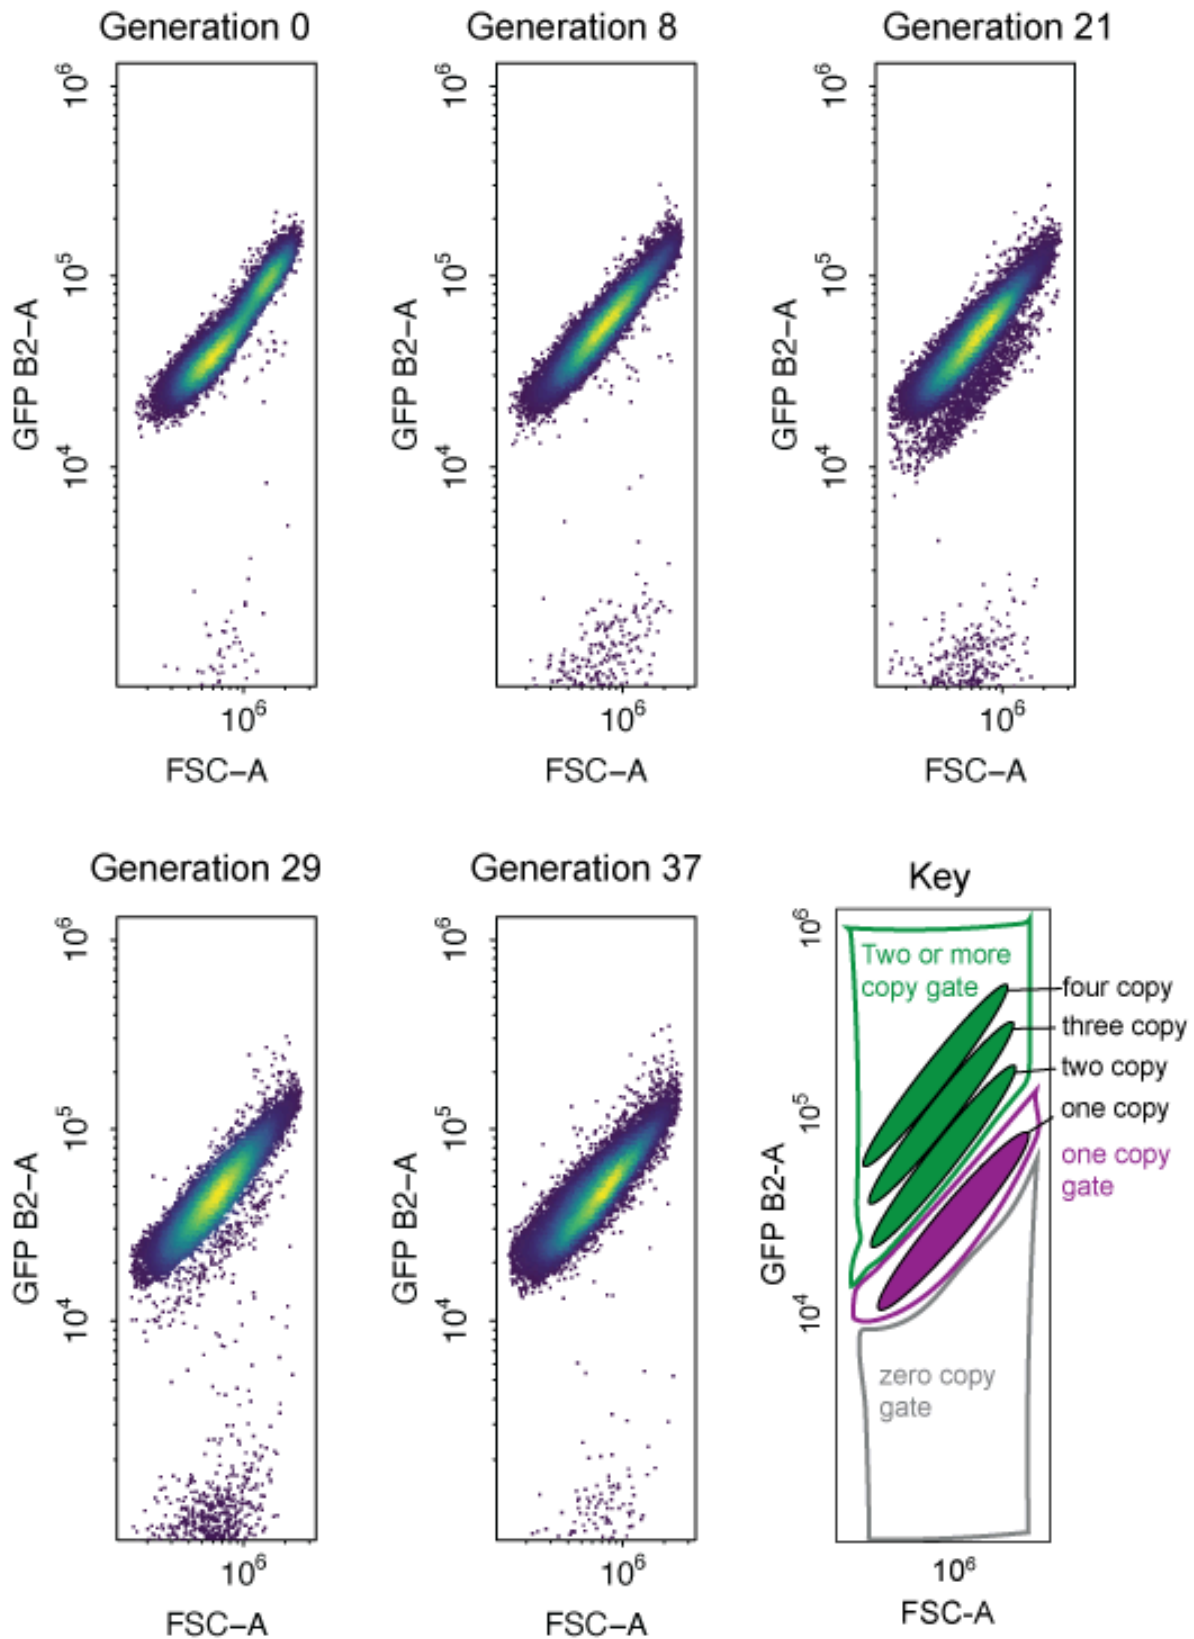

## ALL $\Delta$ population 4

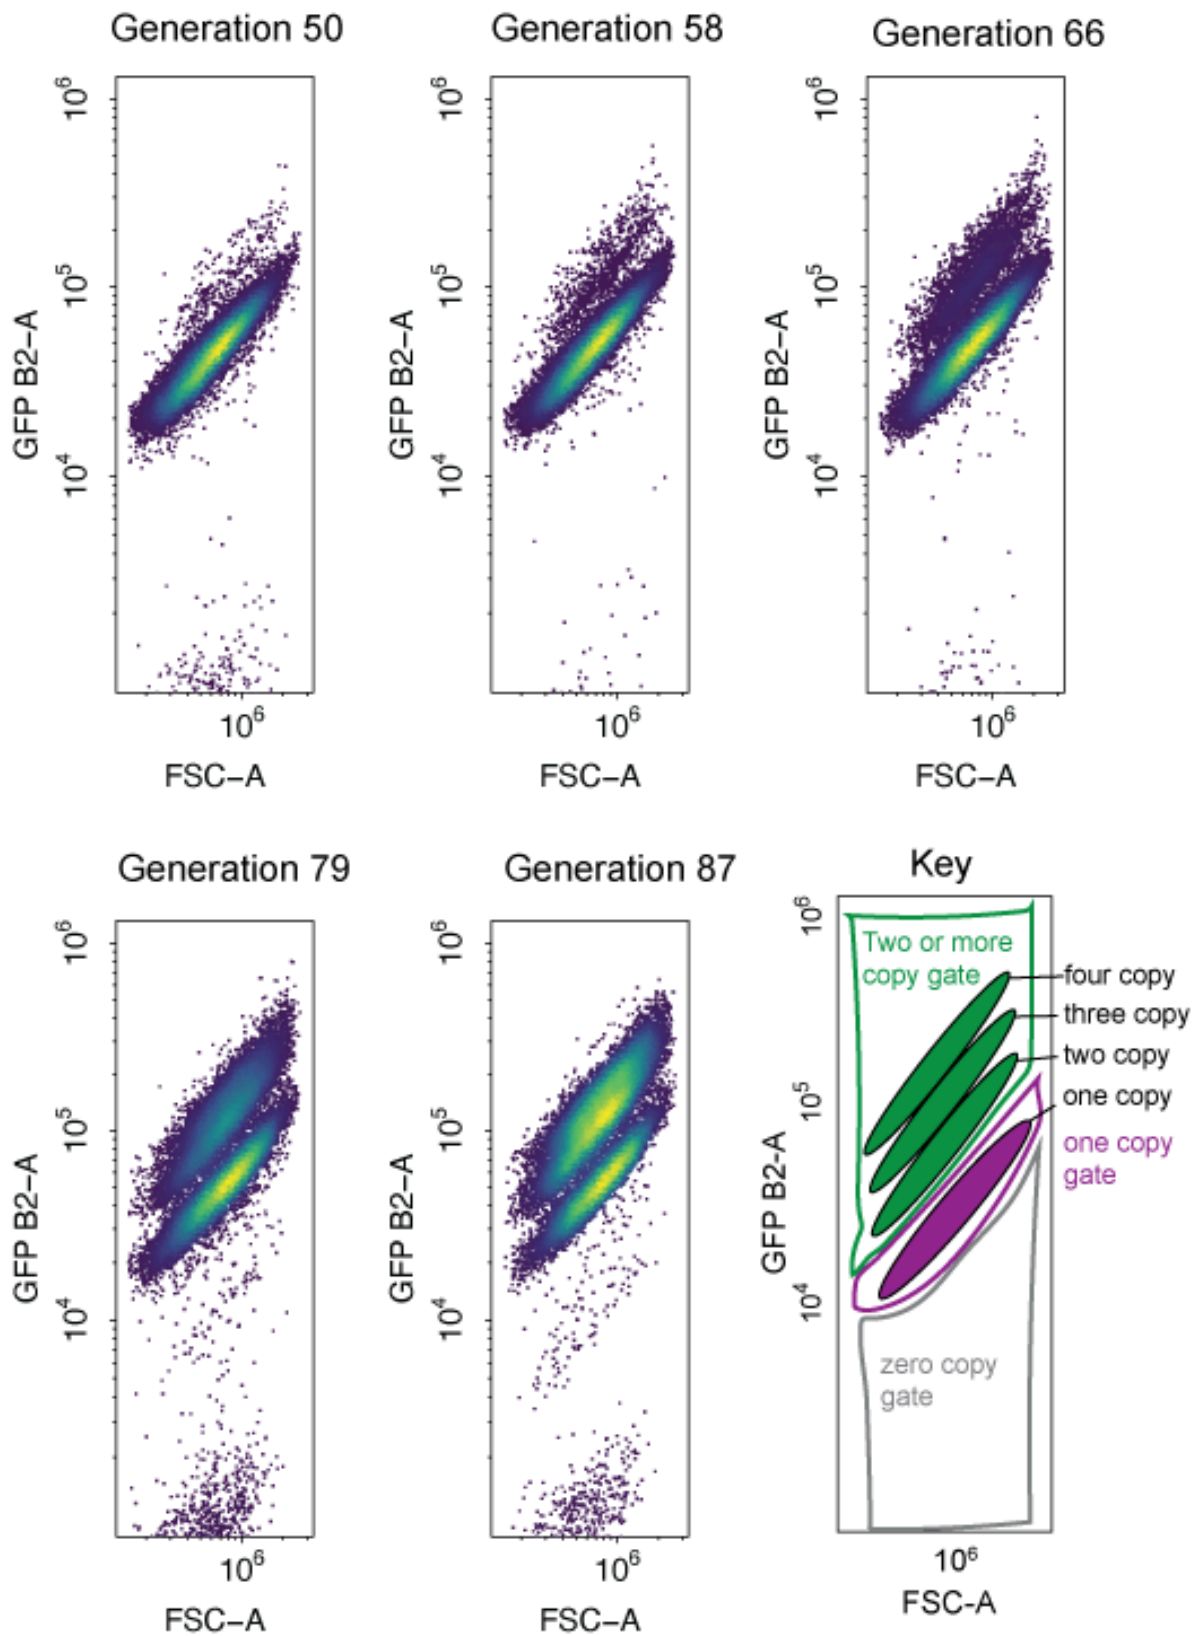

## ALL $\Delta$ population 4

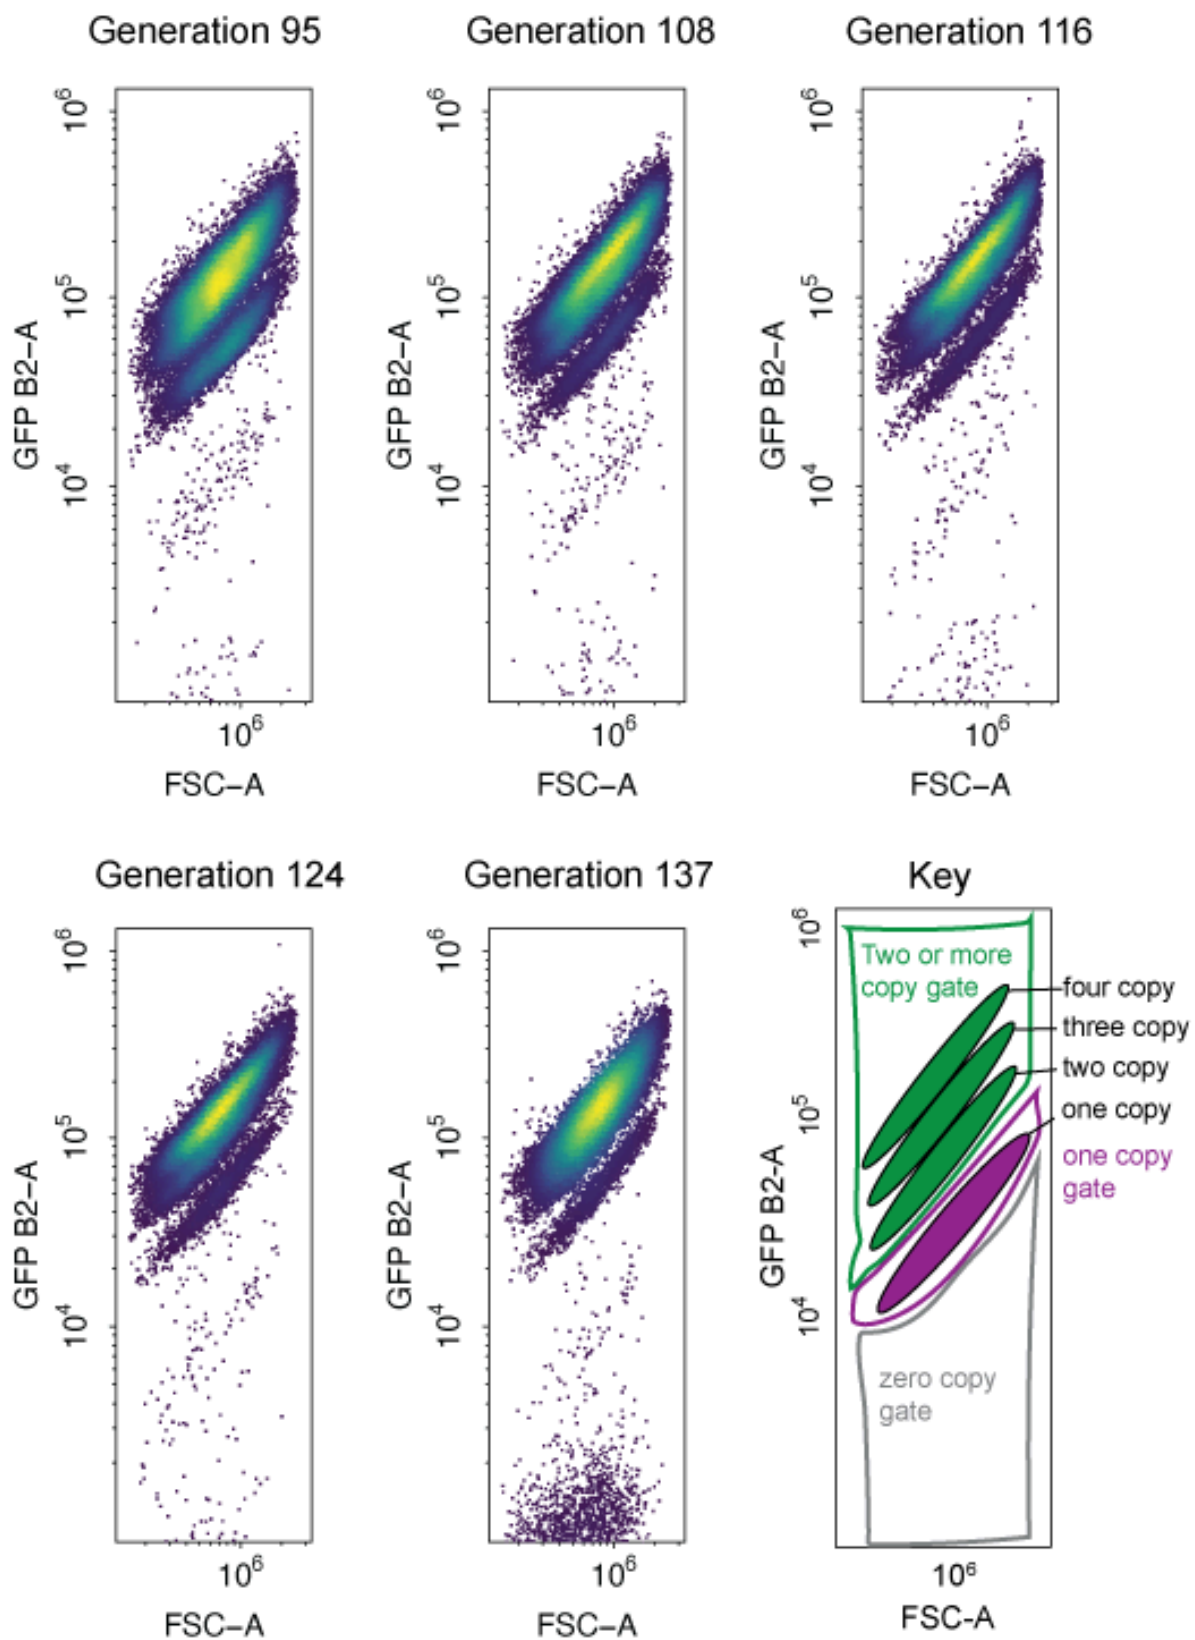

## ALL $\Delta$ population 5

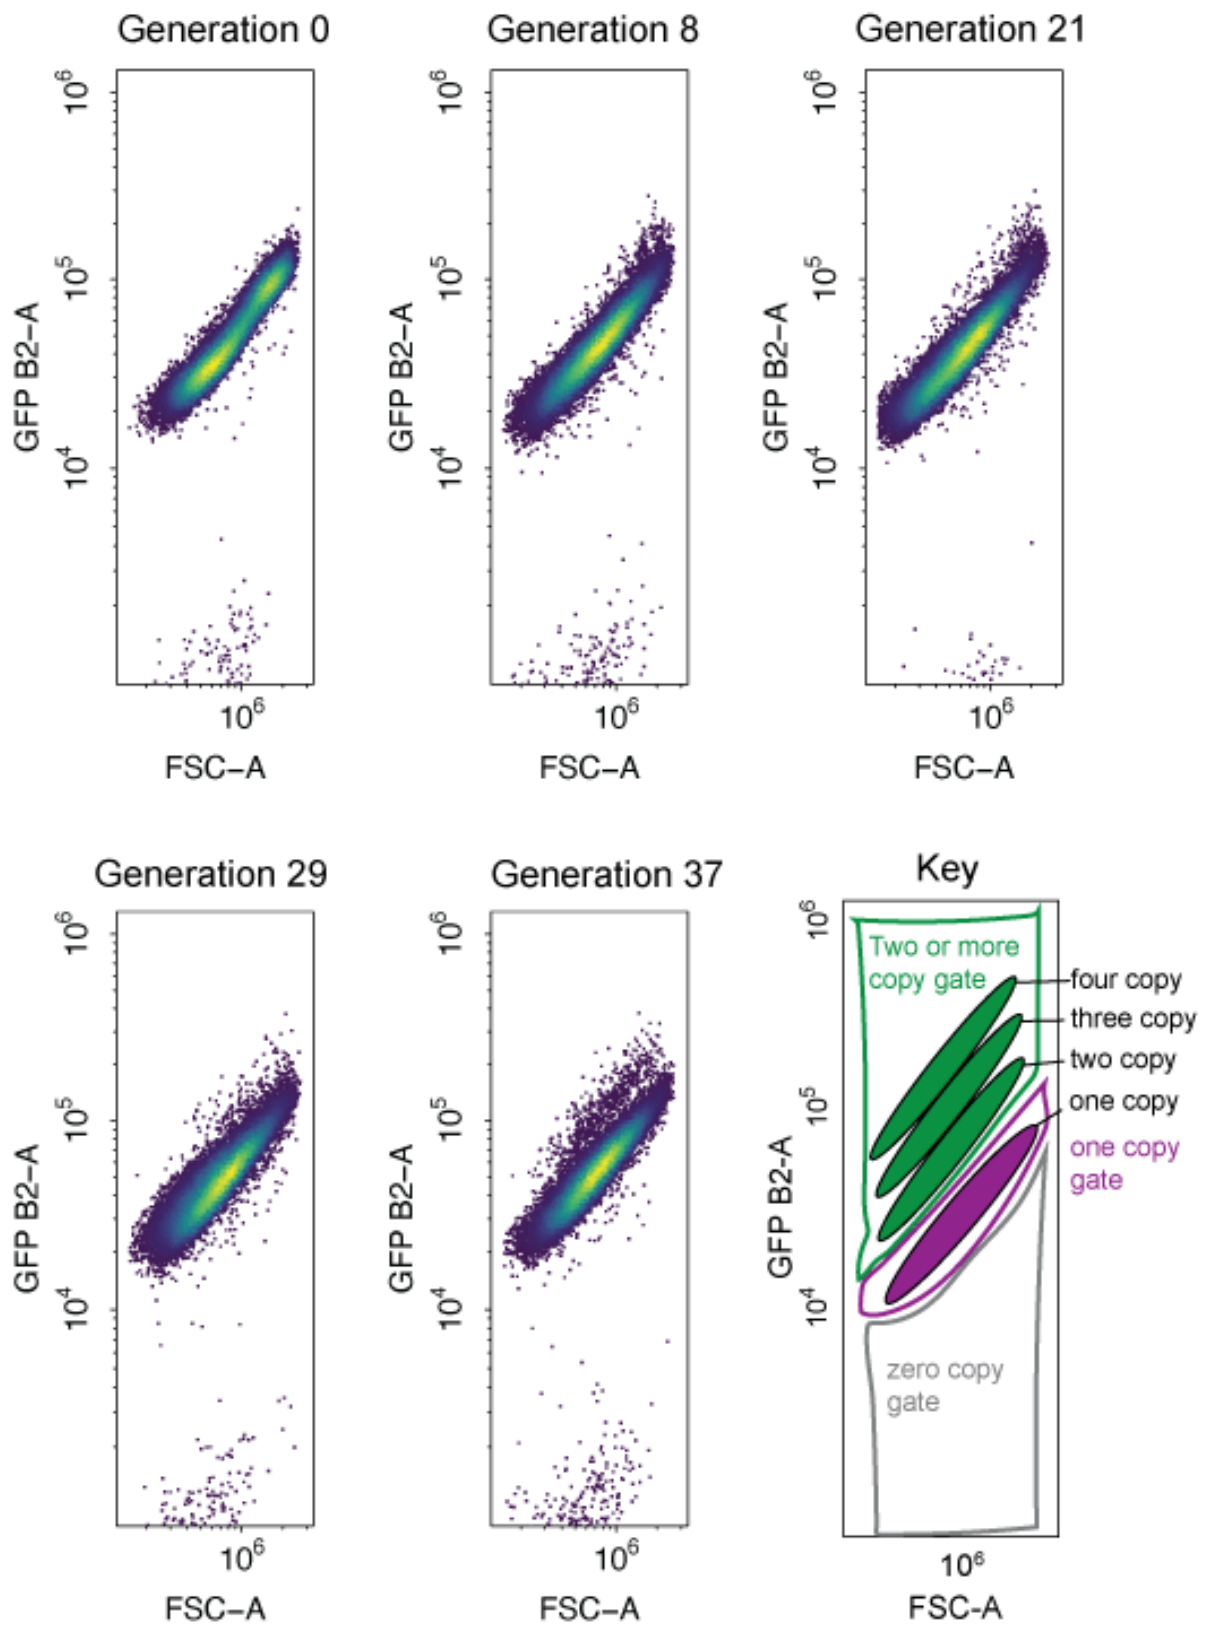

## ALL $\Delta$ population 5

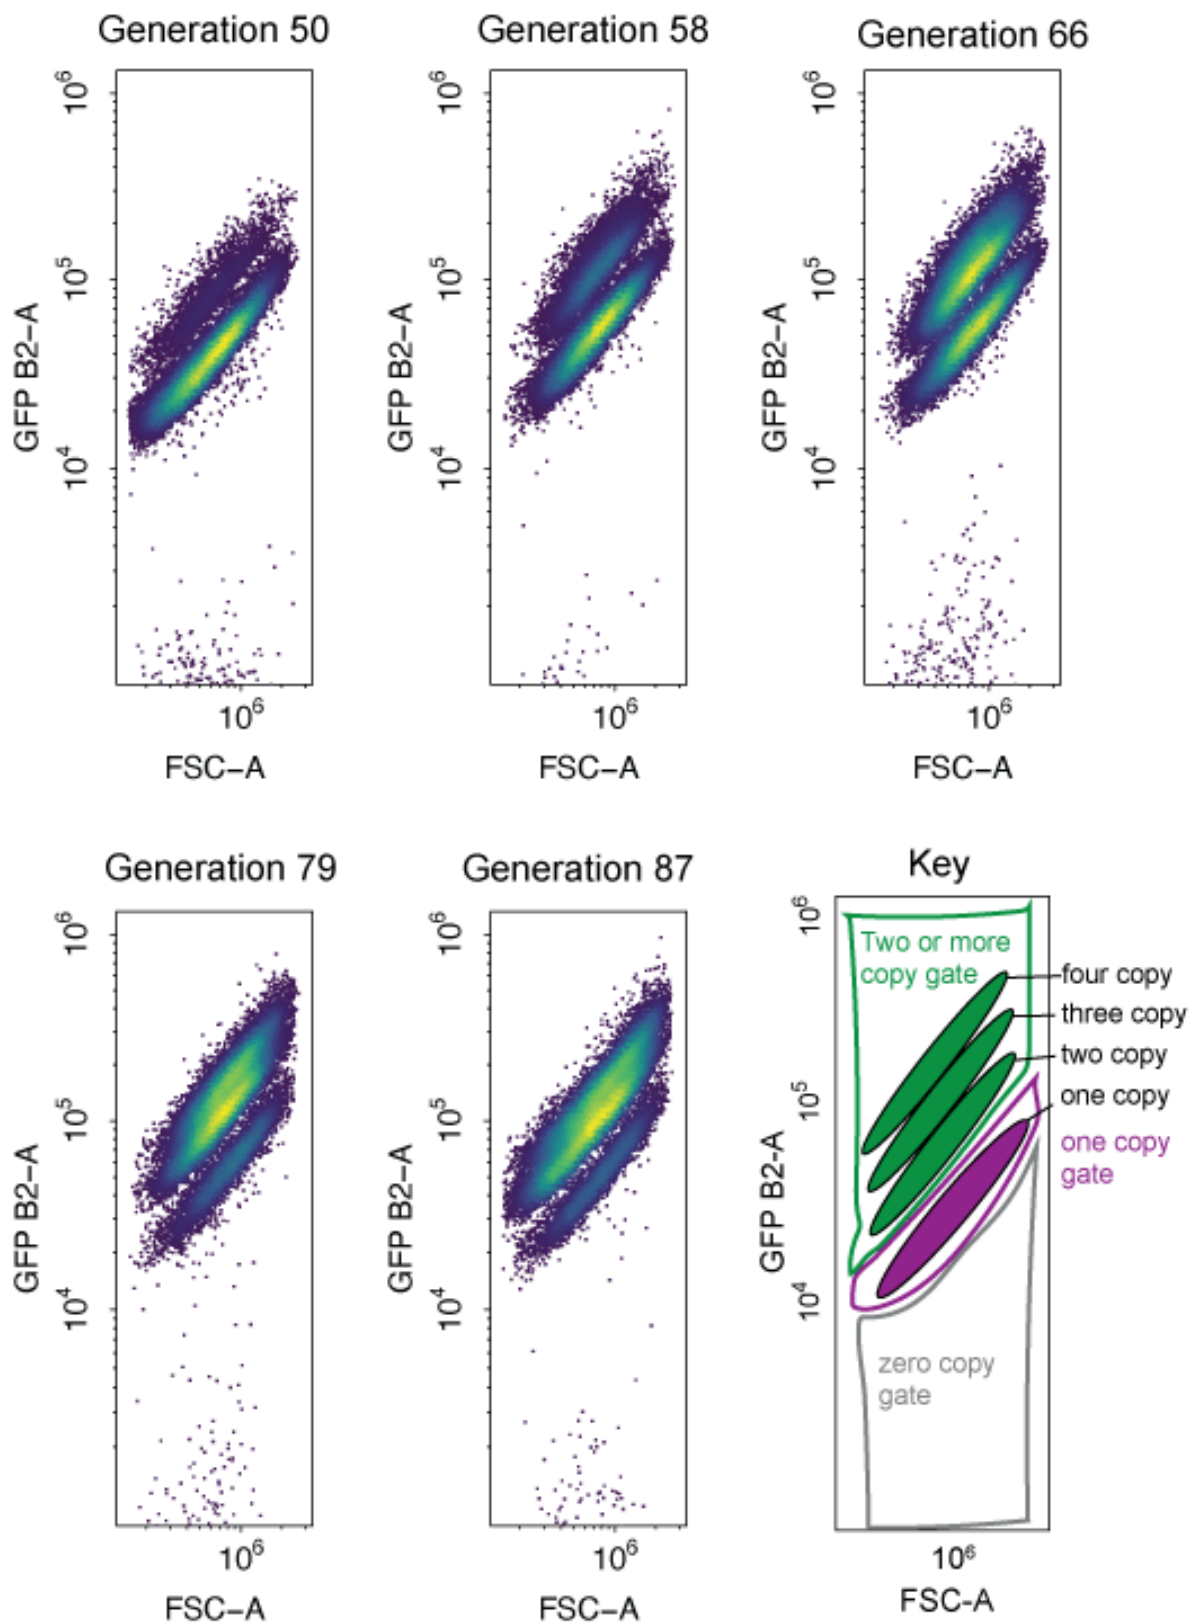

## ALL $\Delta$ population 5

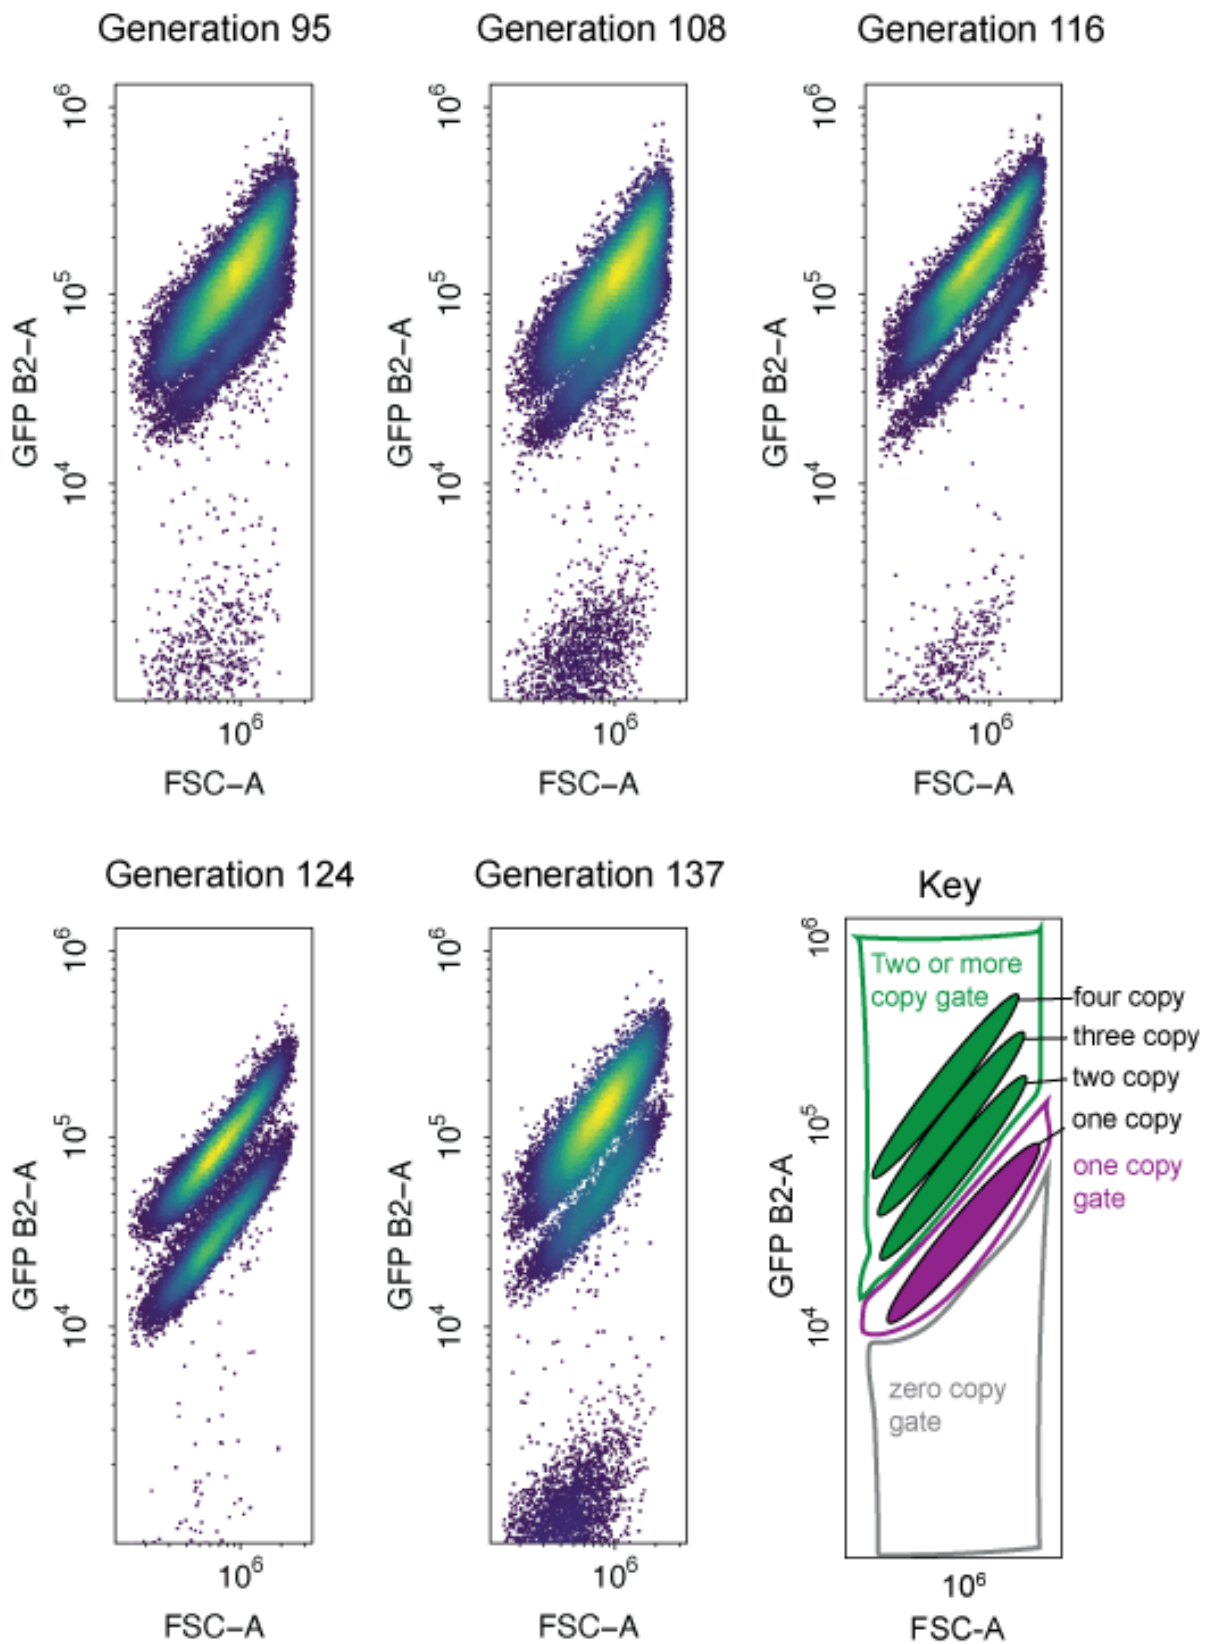



## ALL $\Delta$ population 6

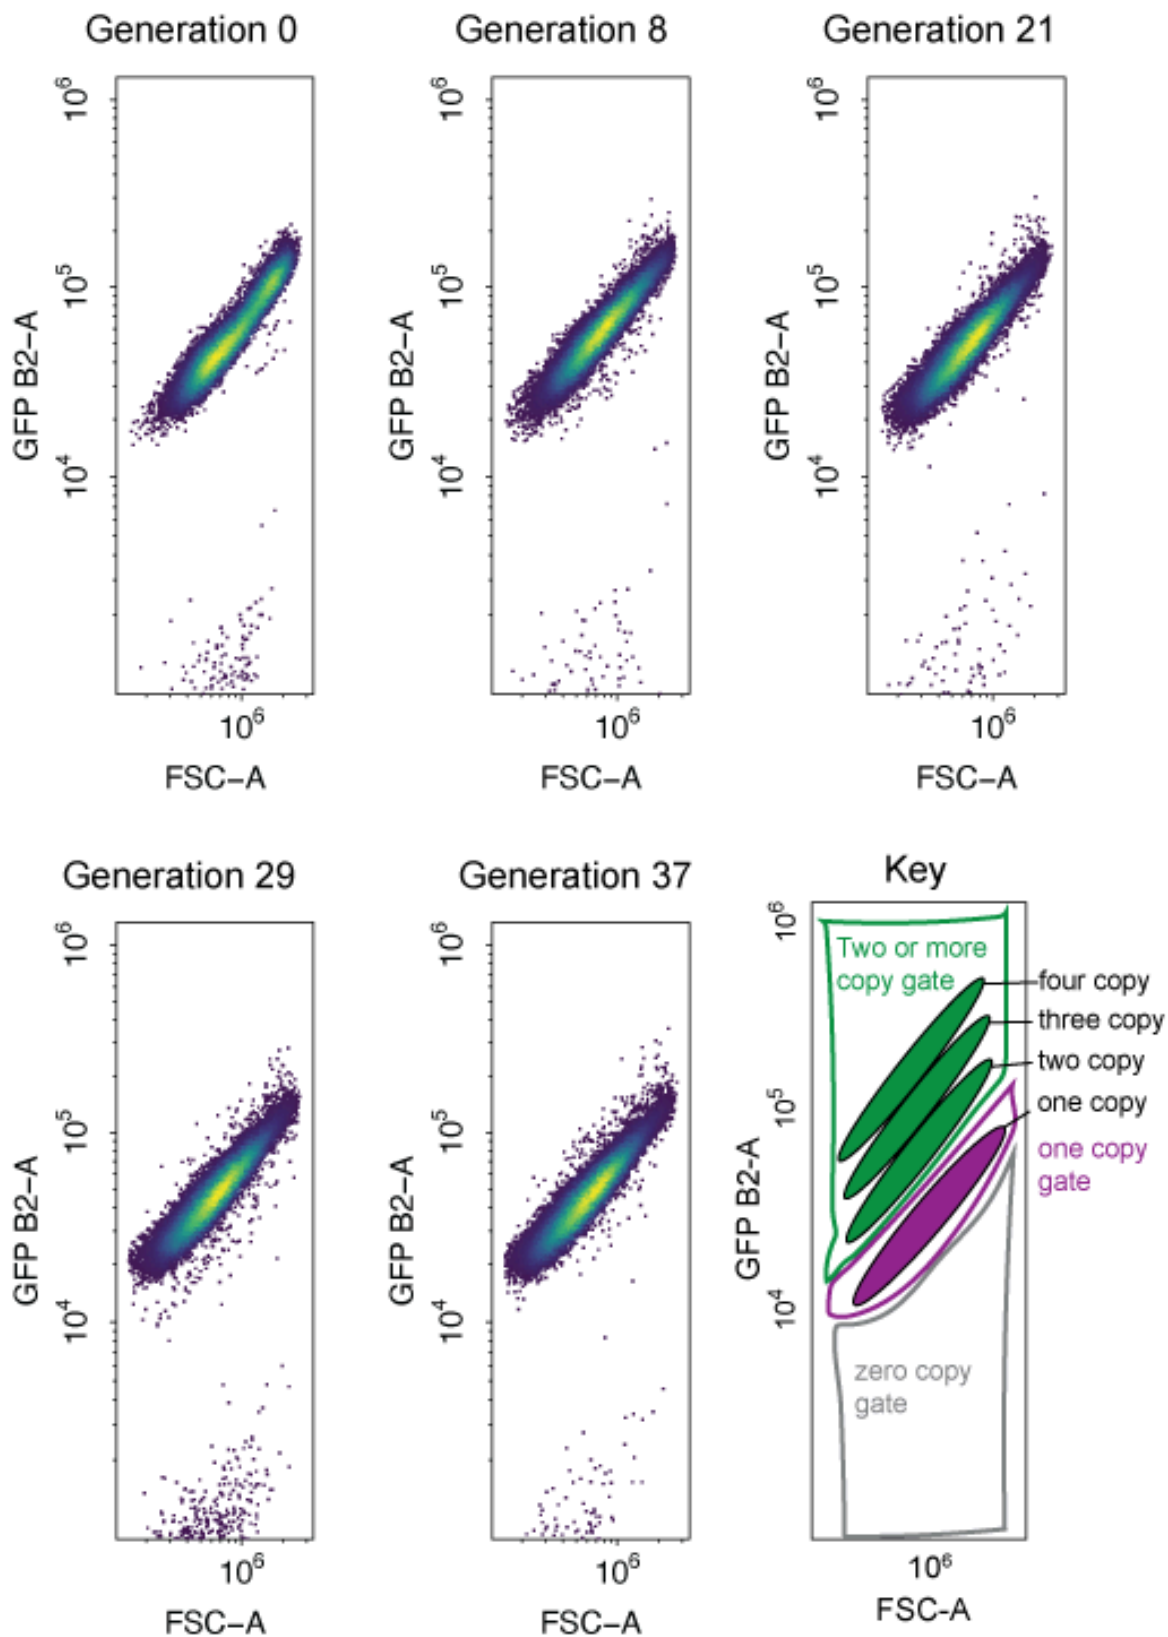

## ALL $\Delta$ population 6

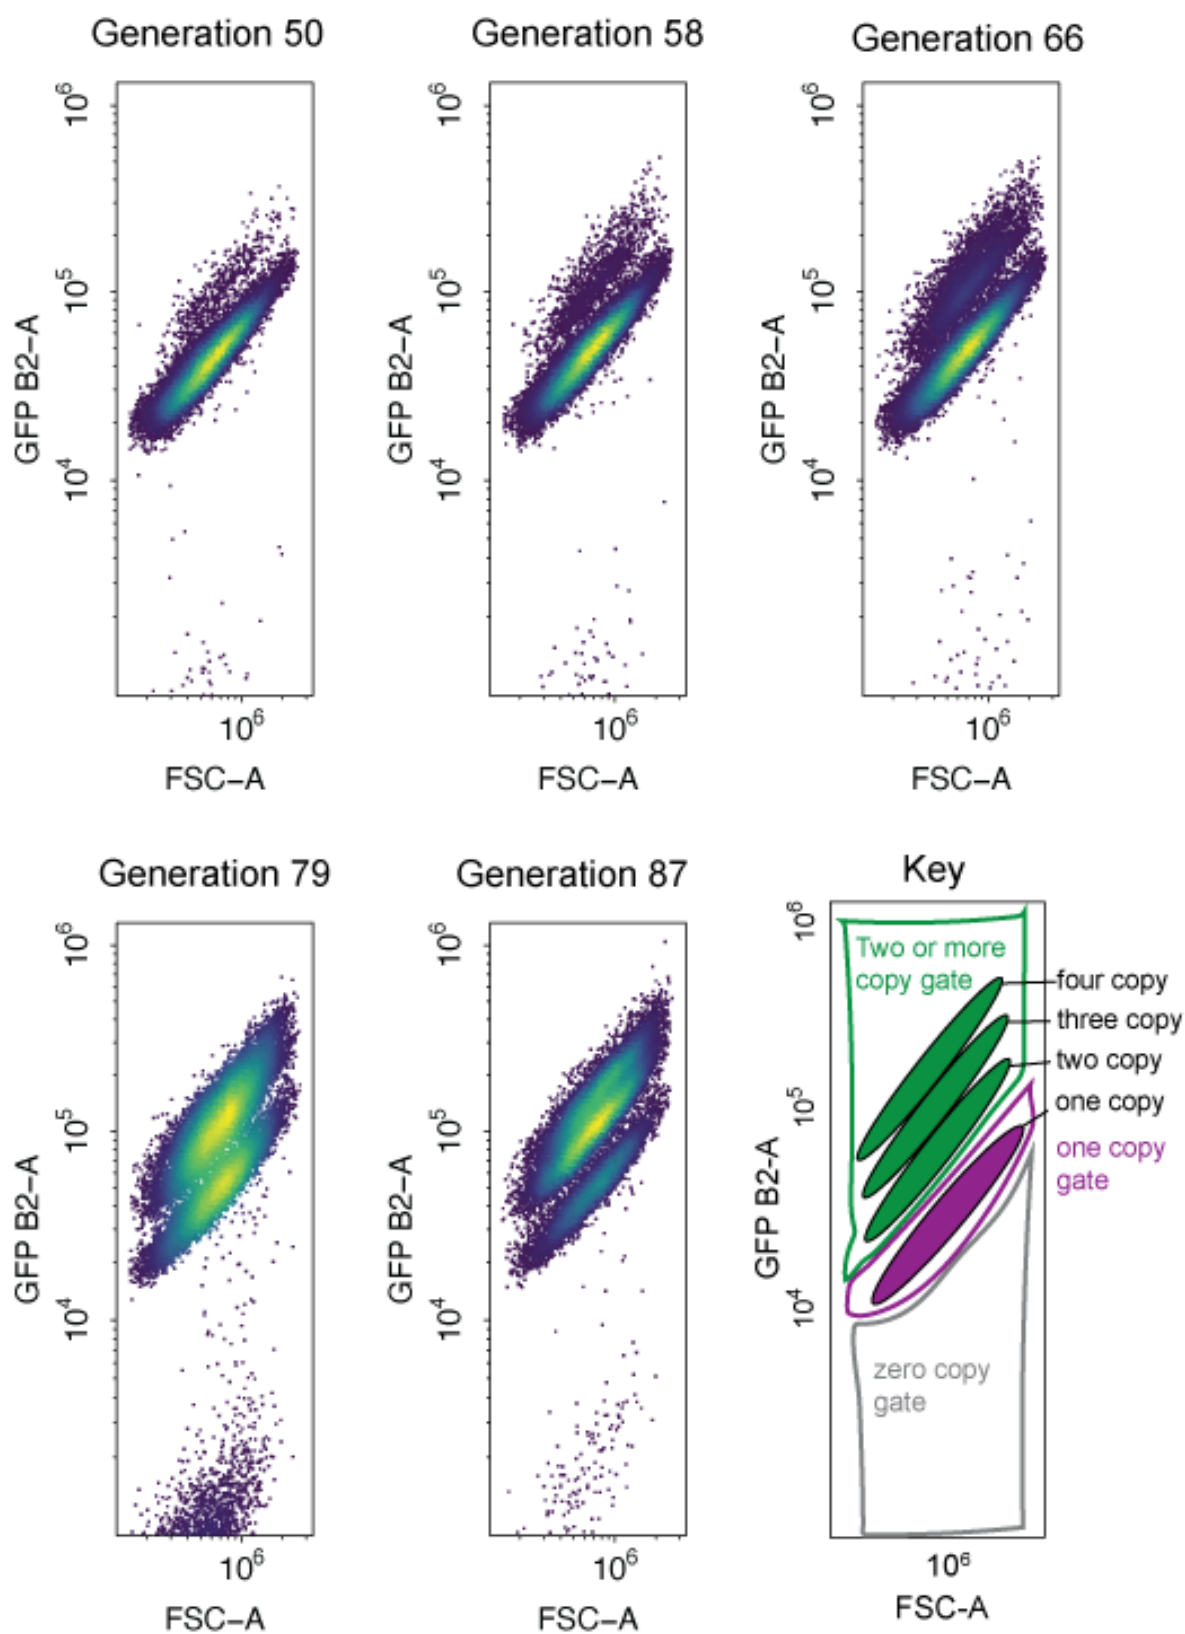

## ALL $\Delta$ population 6

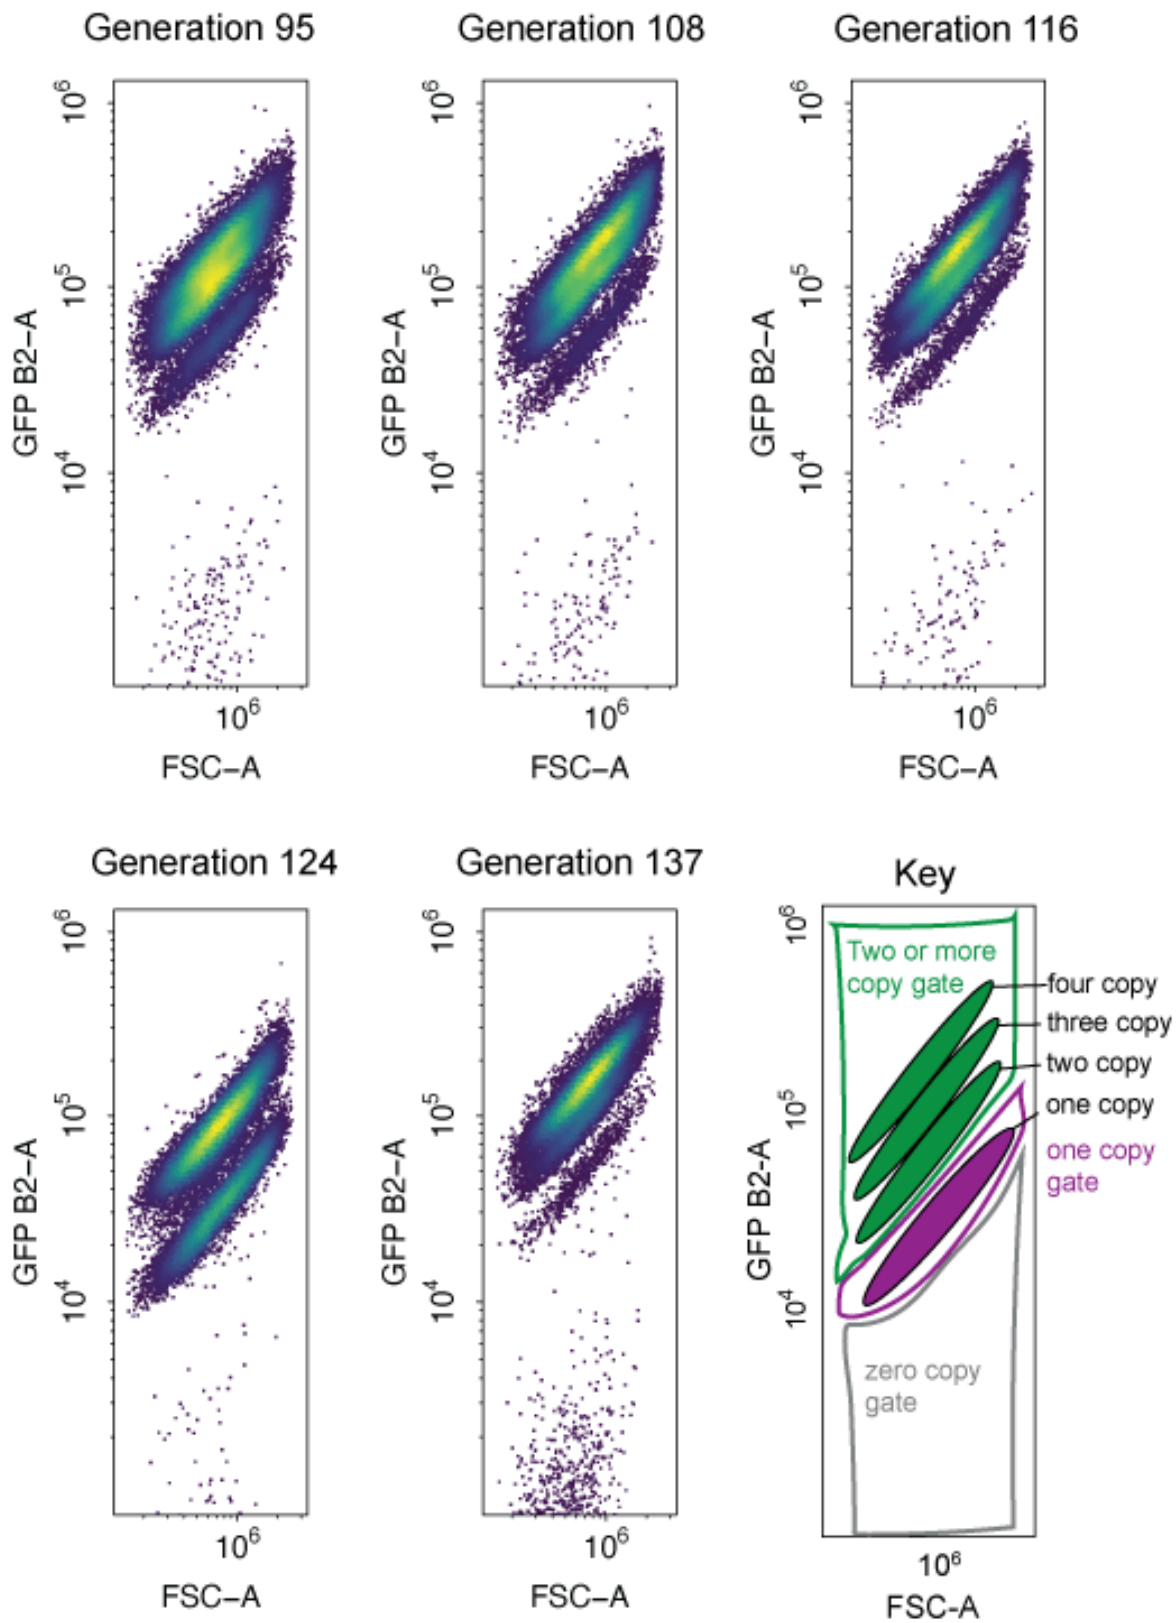

## ALL $\Delta$ population 7

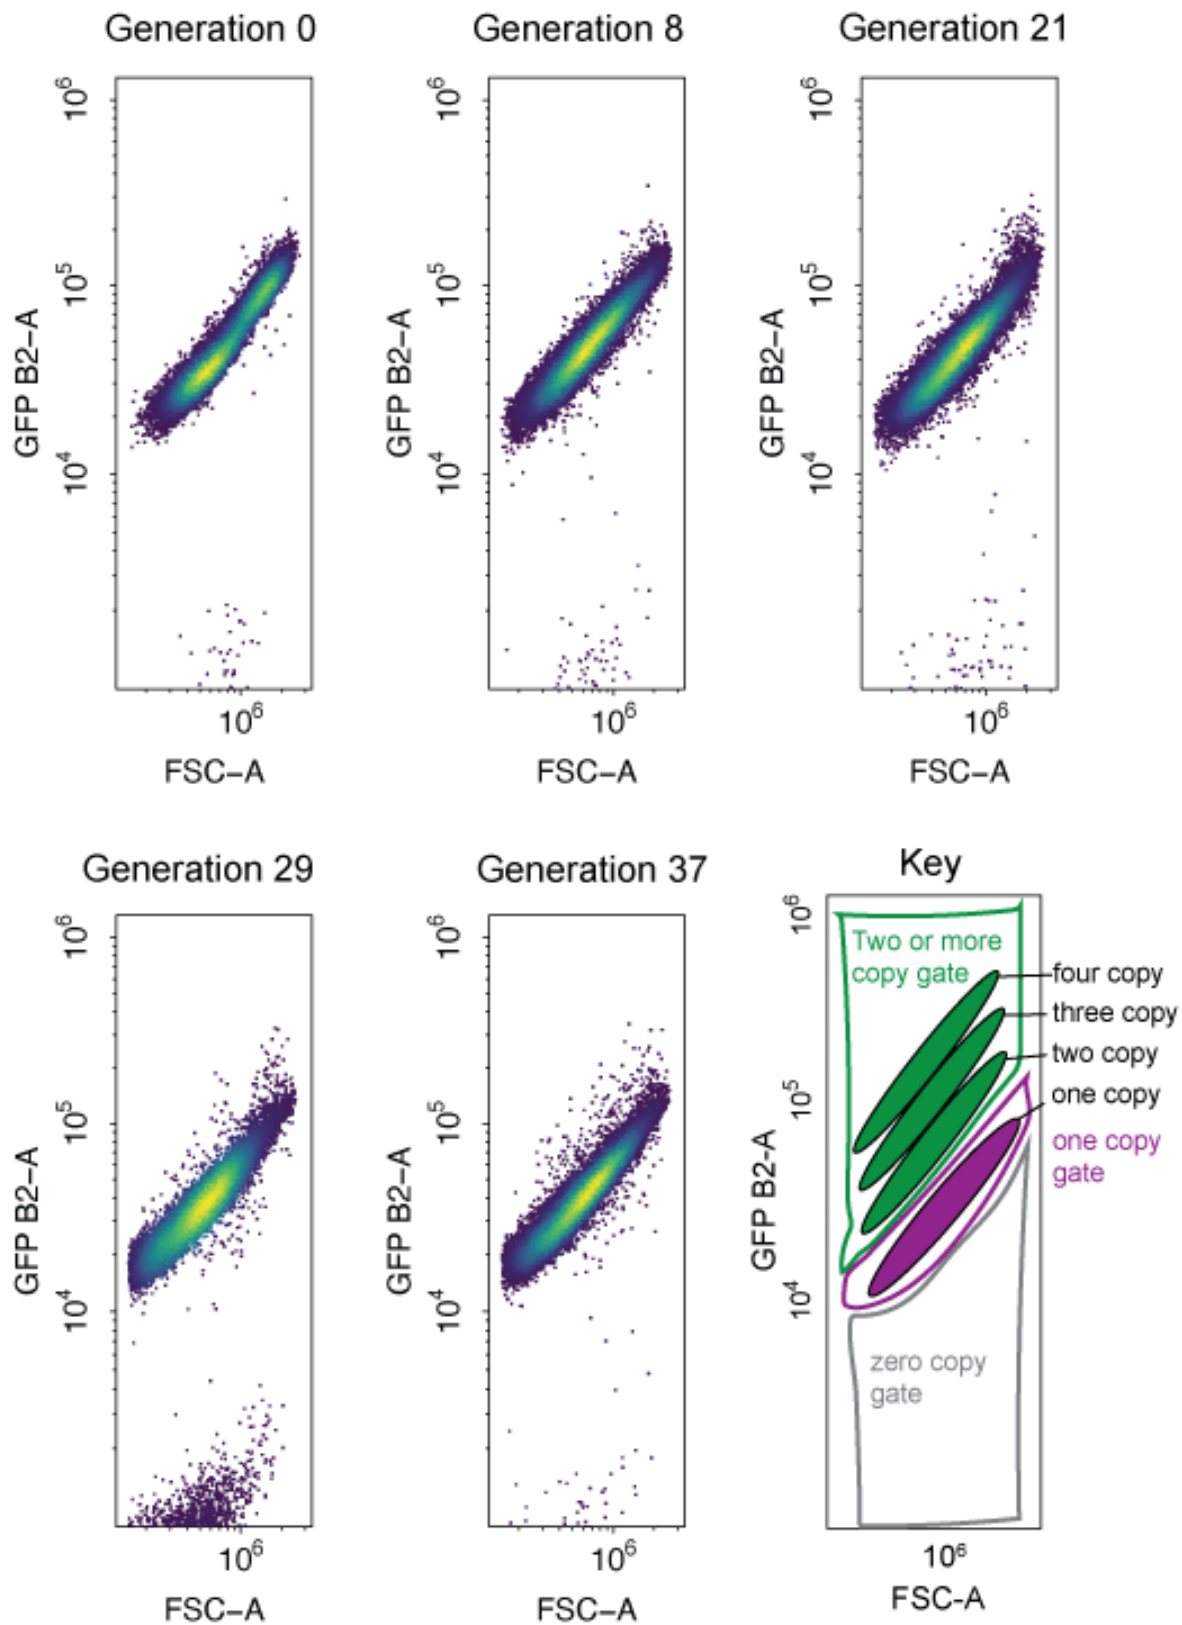

## ALL $\Delta$ population 7

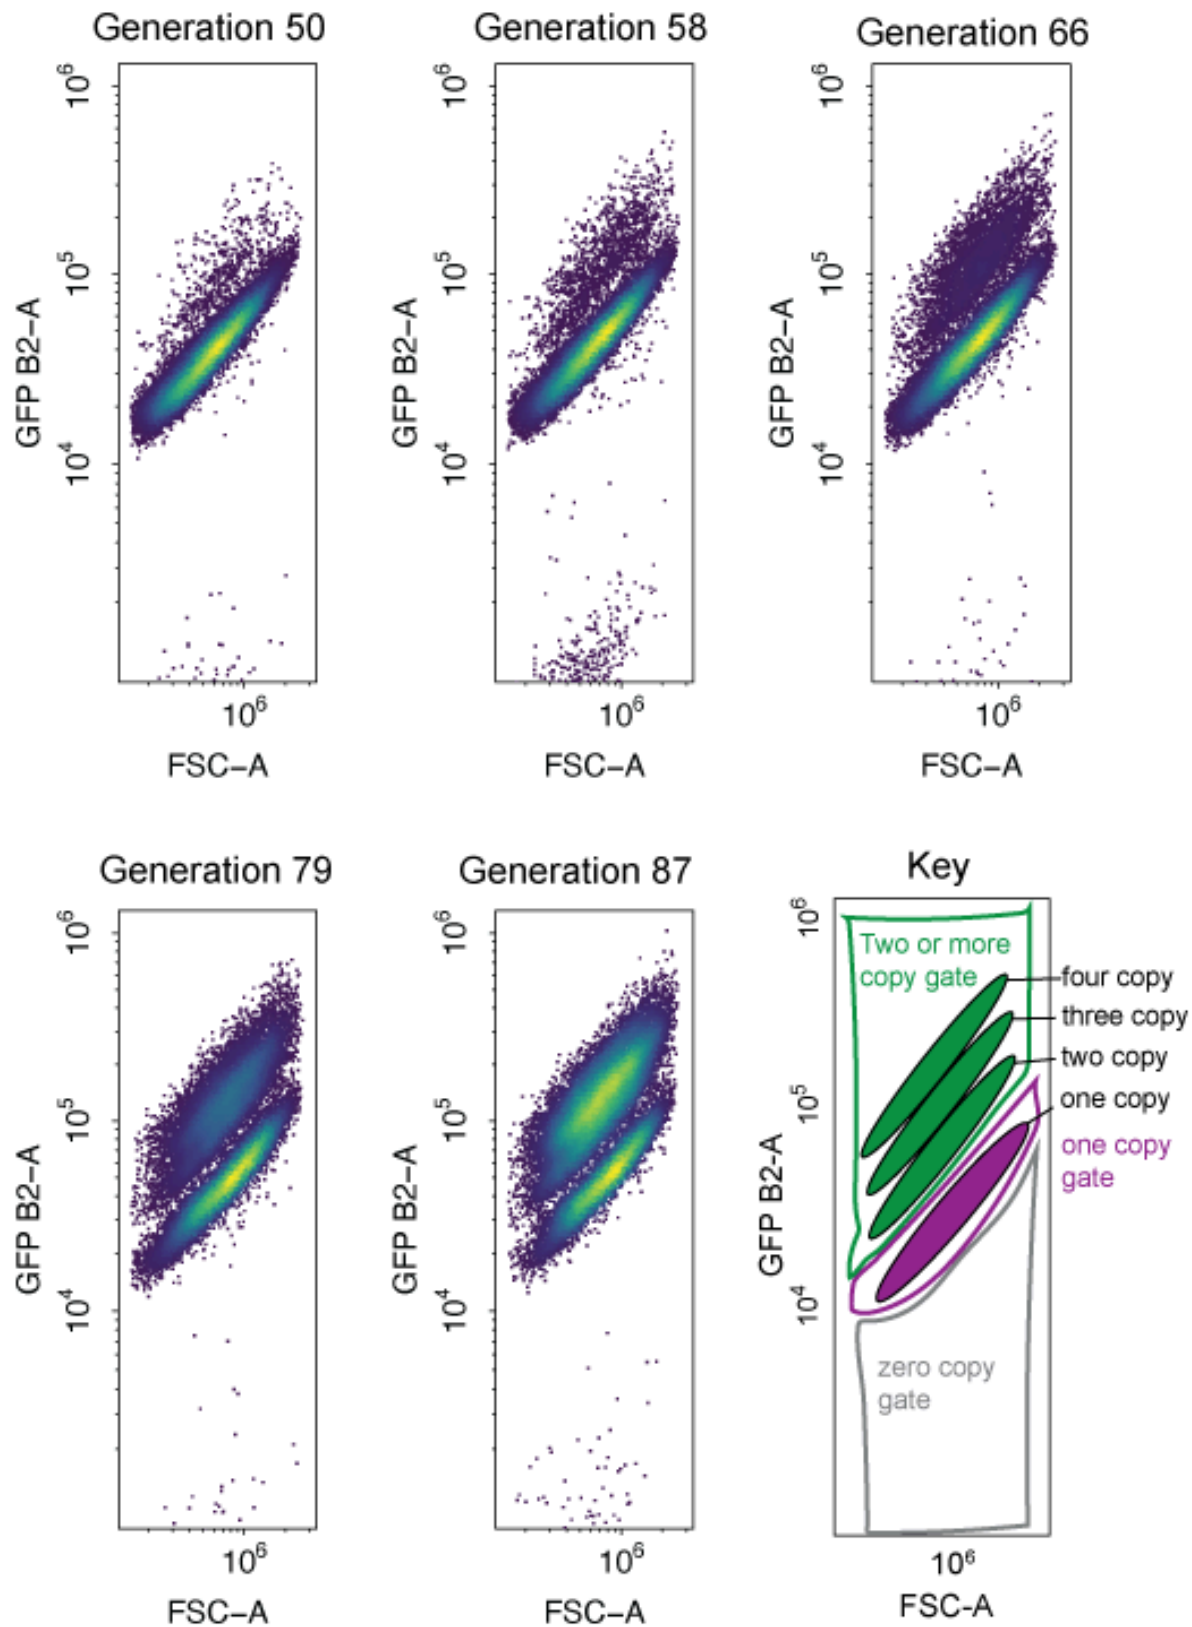

## ALL $\Delta$ population 7

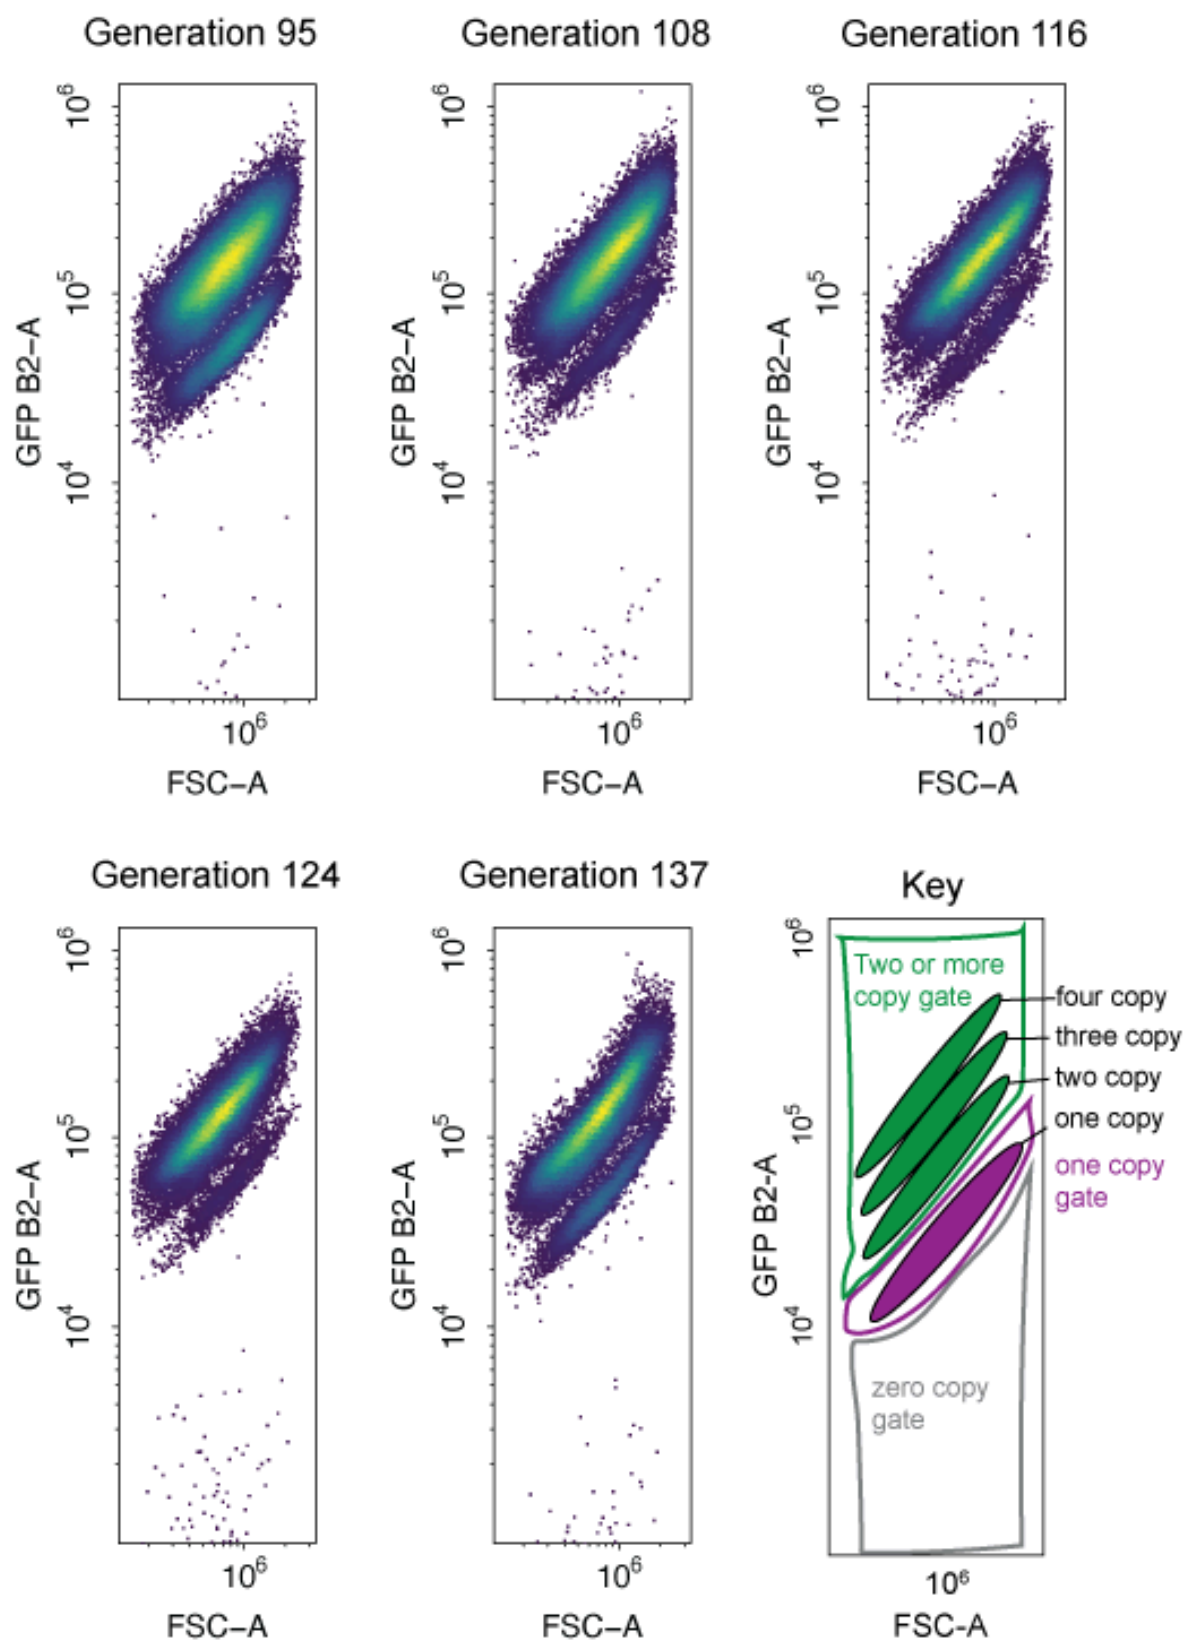

## ALL $\Delta$ population 8

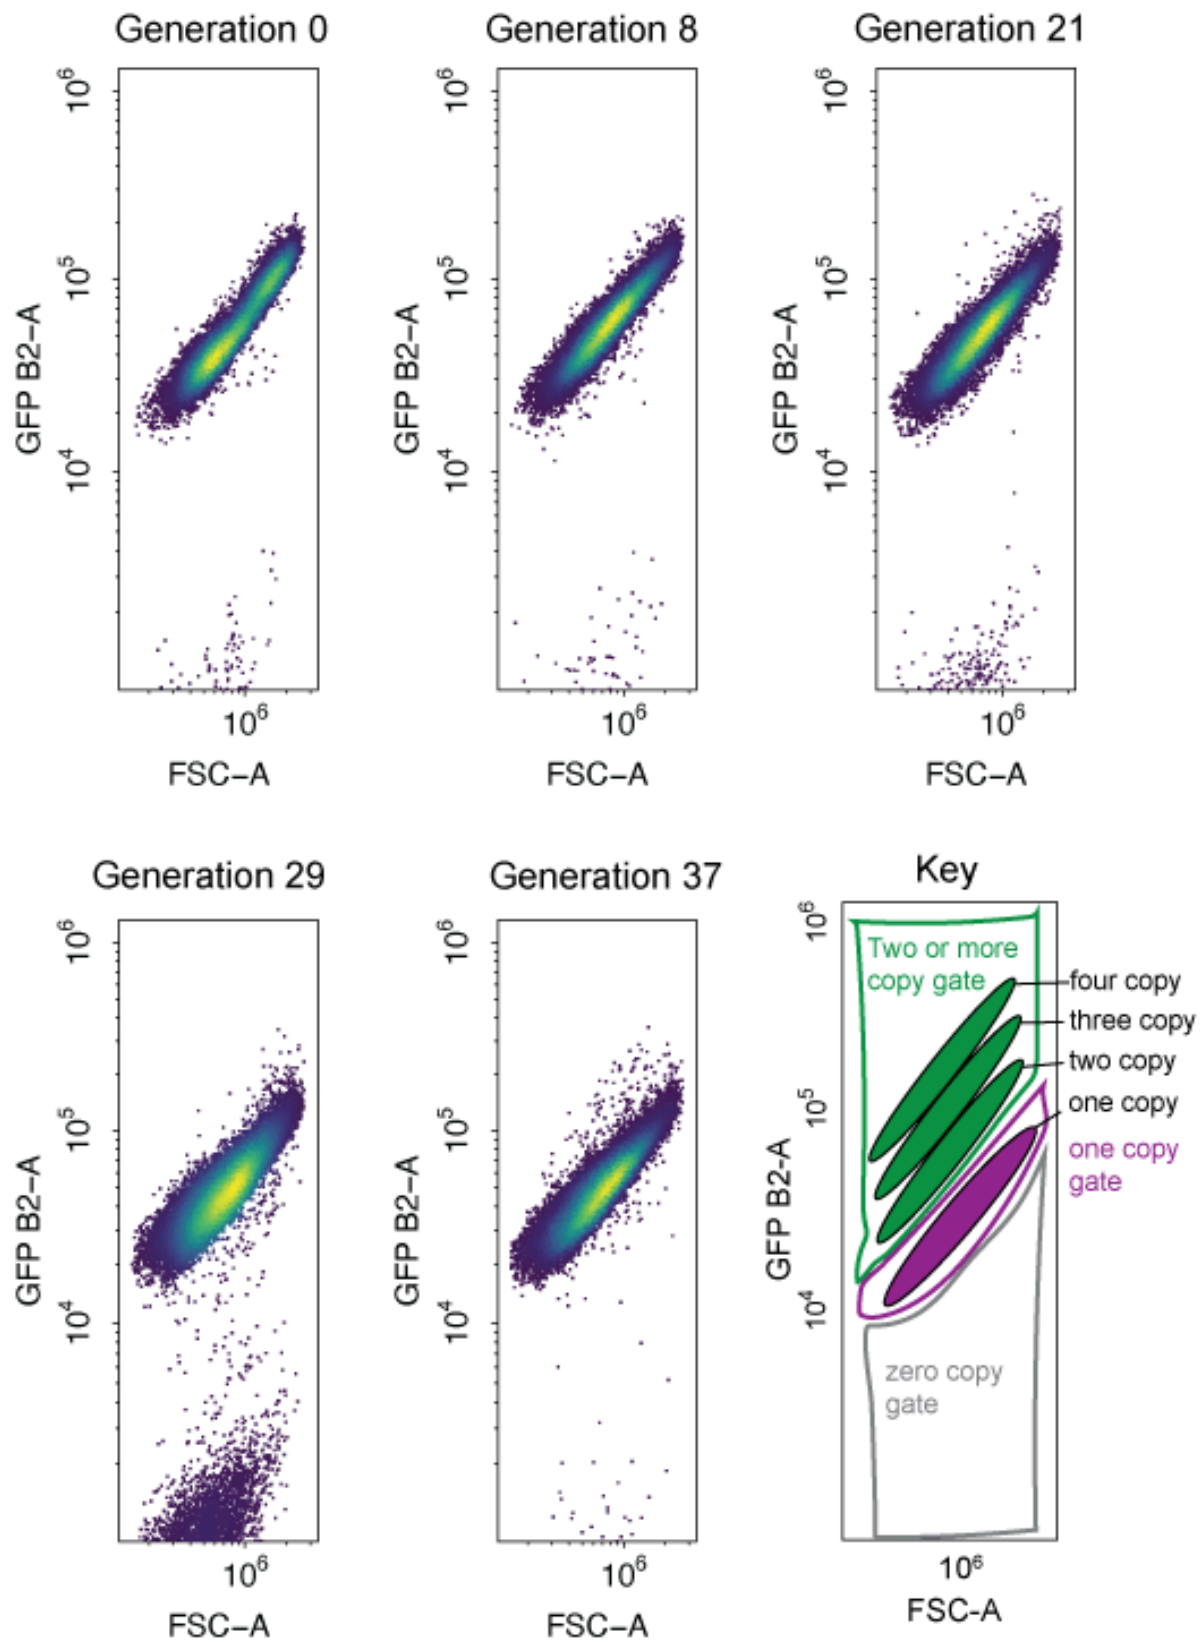

## ALL $\Delta$ population 8

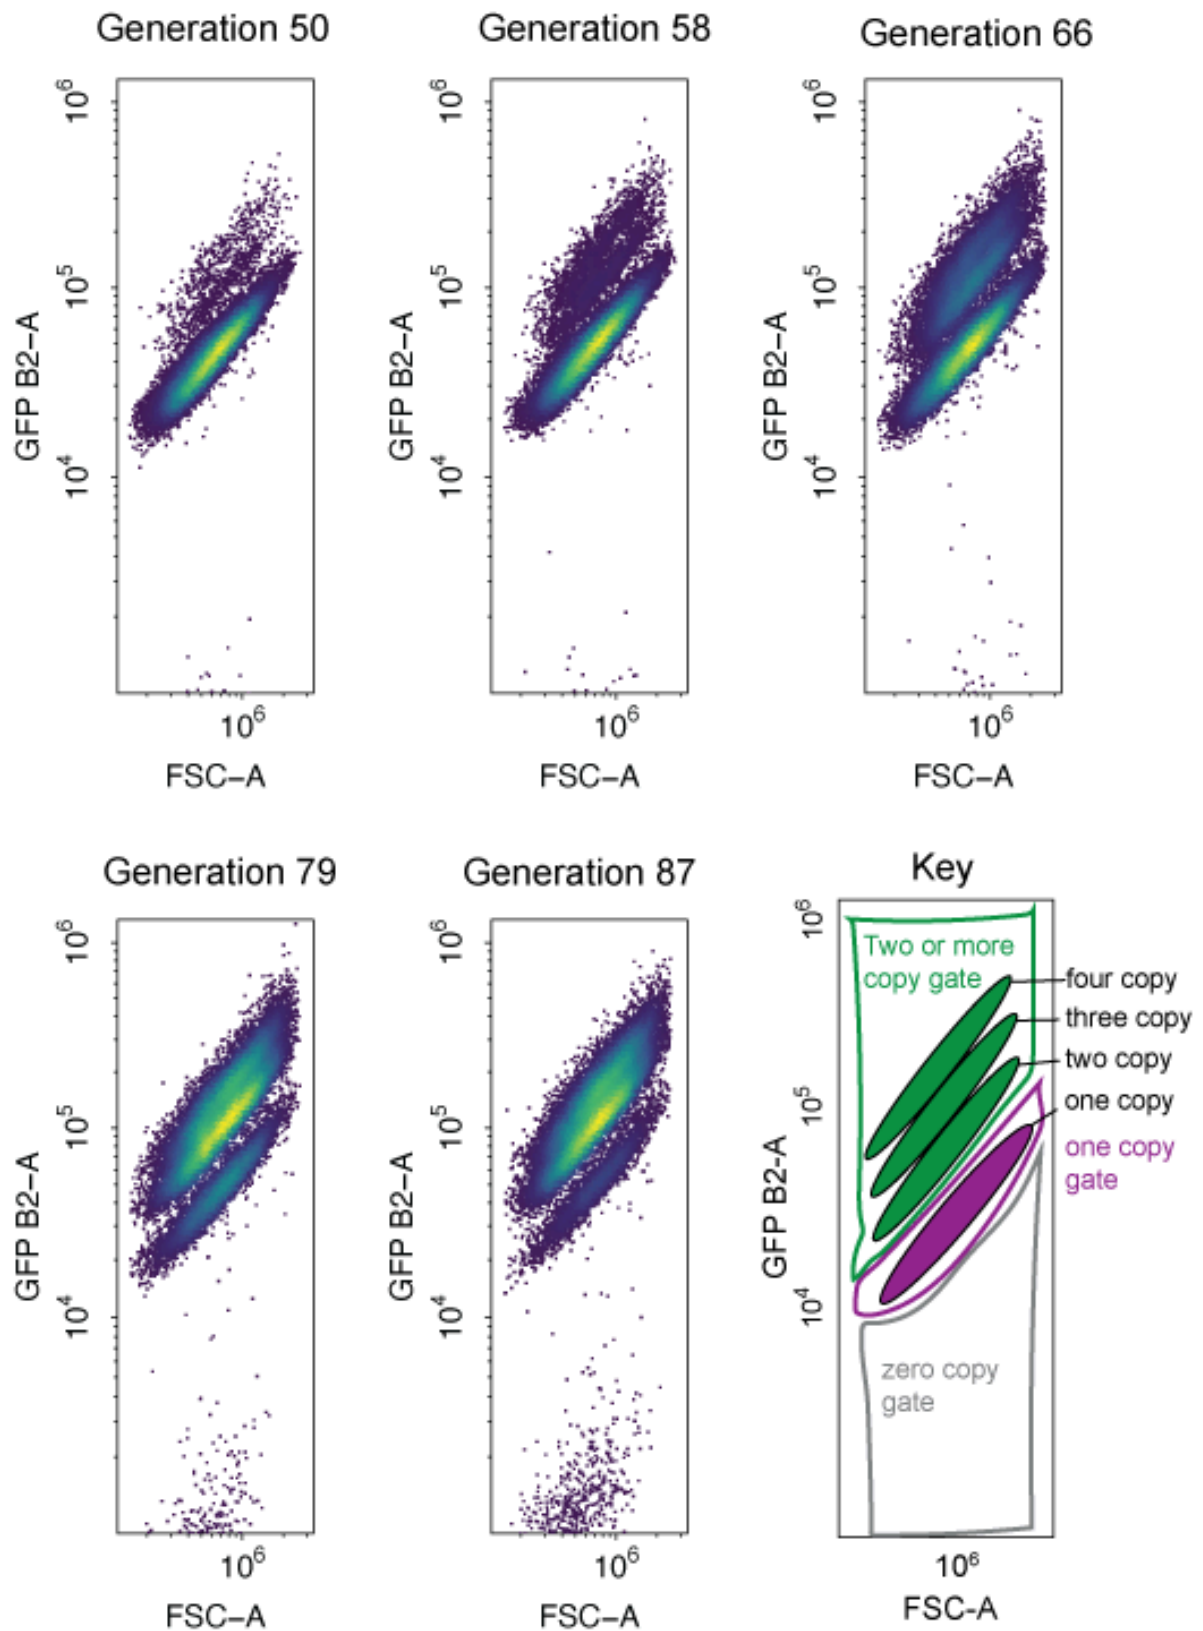



## ARS $\Delta$ population 8

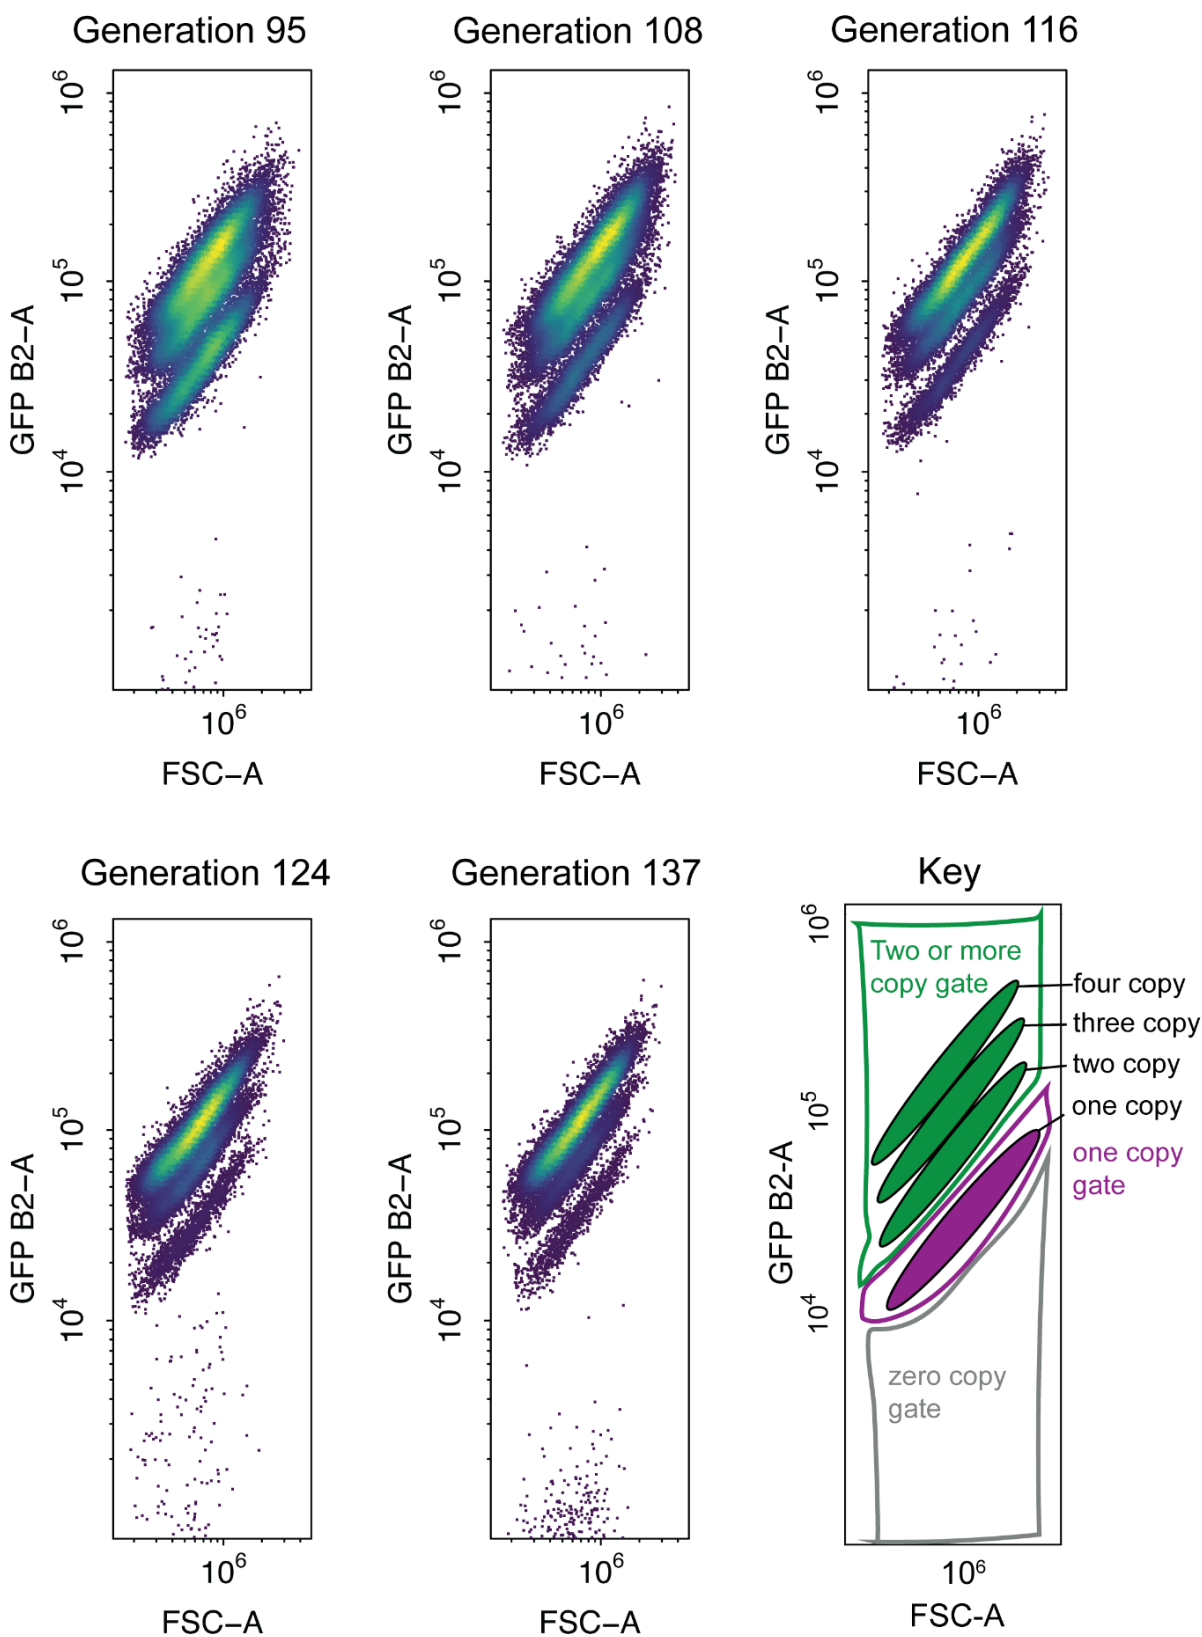

**Supplementary Figure 2. Raw flow cytometry plots over the long term experimental evolution** FSC-A is forward scatter-area which is a proxy for cell size. GFP fluorescence was measured using the B2-A channel in arbitrary units. Hierarchical gating was performed to identify zero-, one-, and two-or-more-copy populations. Within the two-or-more copy gate, distinct subpopulations formed consistent with having a two-, three-, four- copies of GFP.

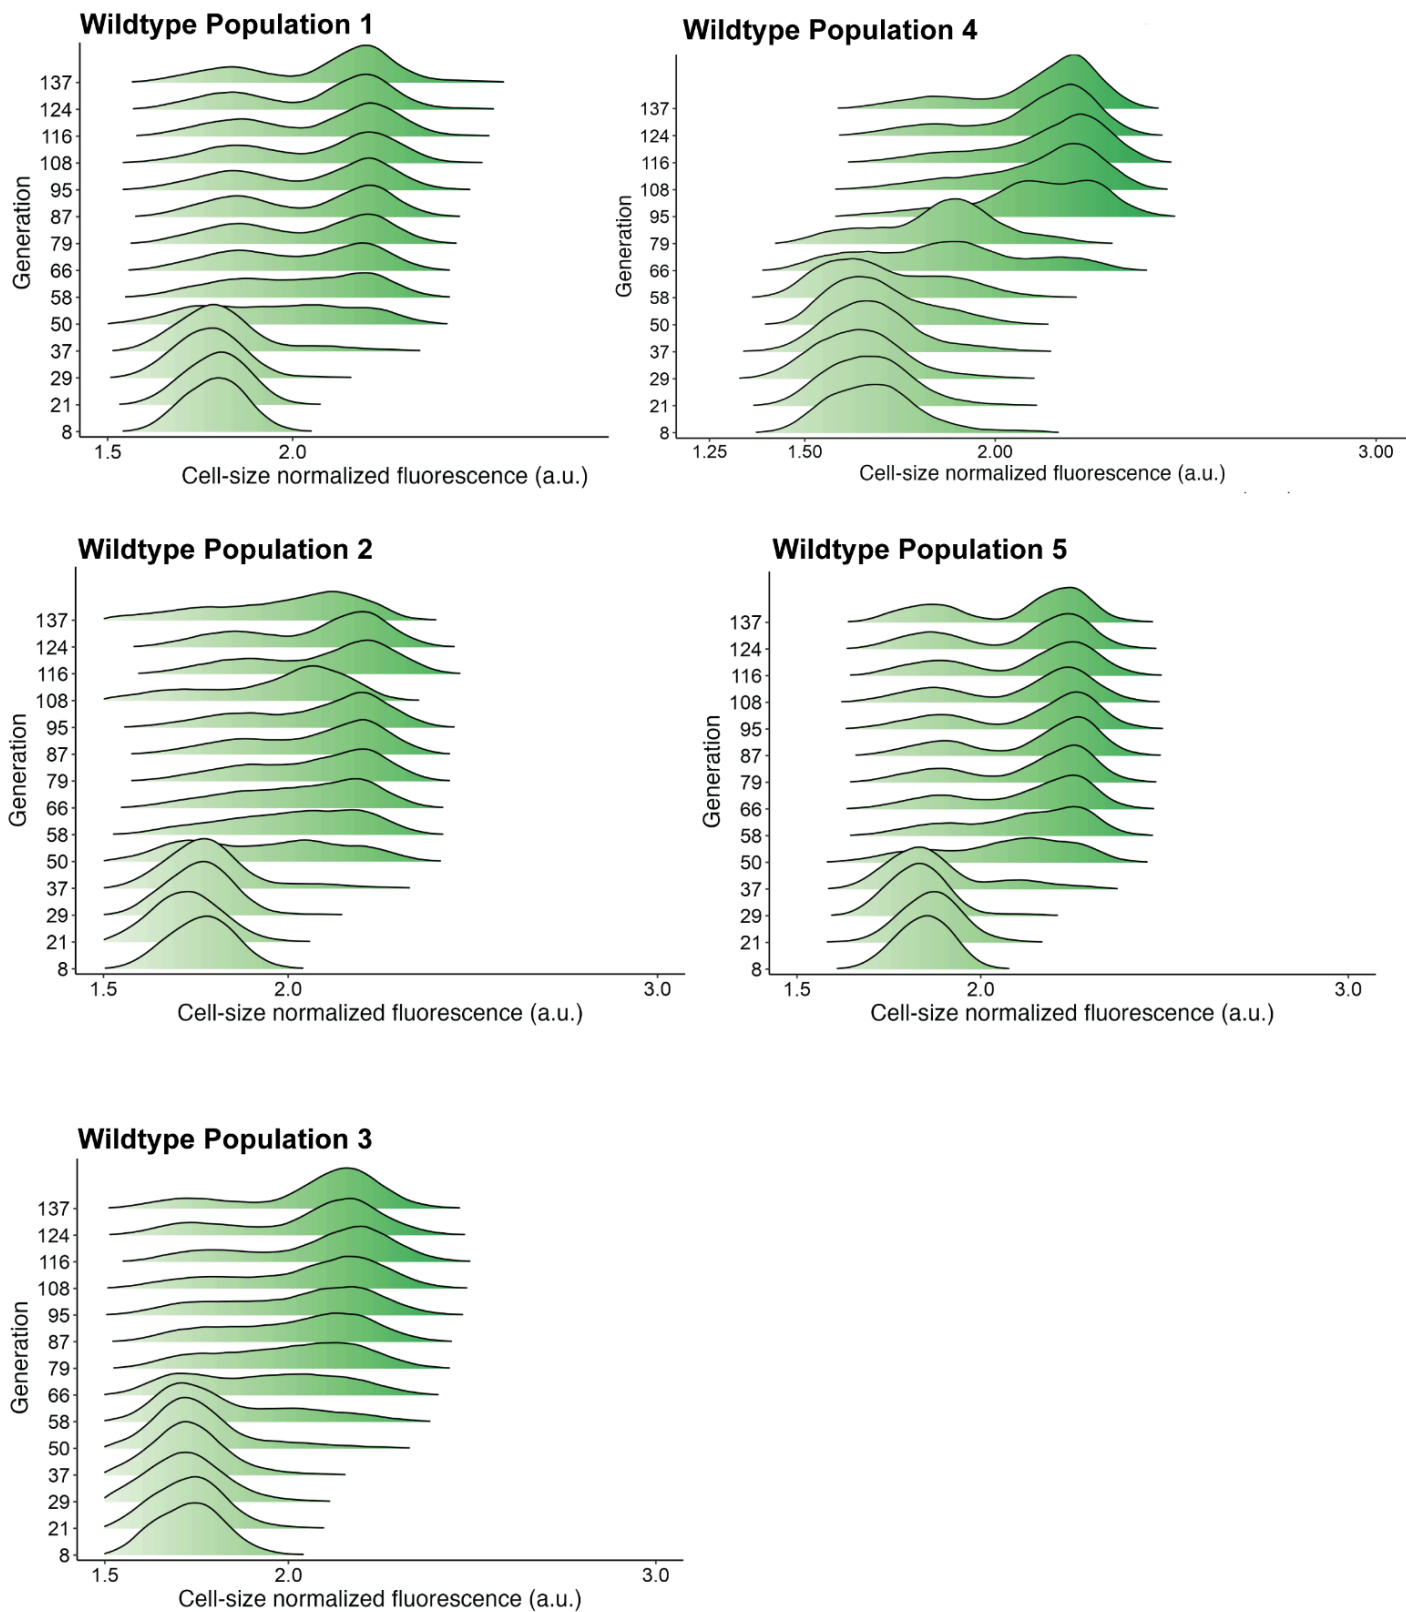

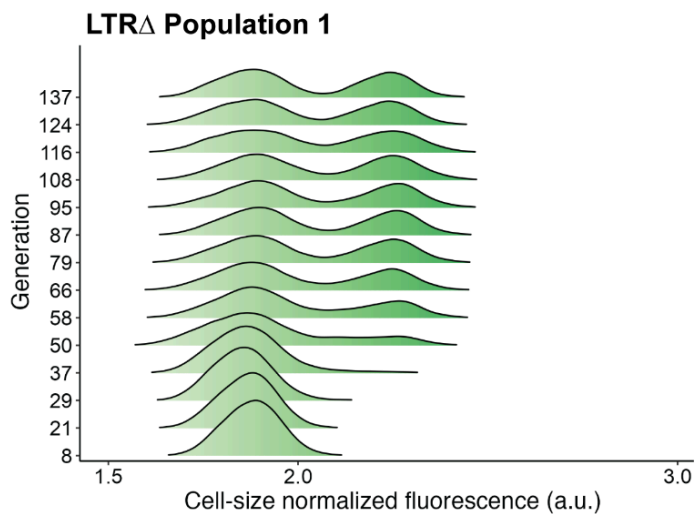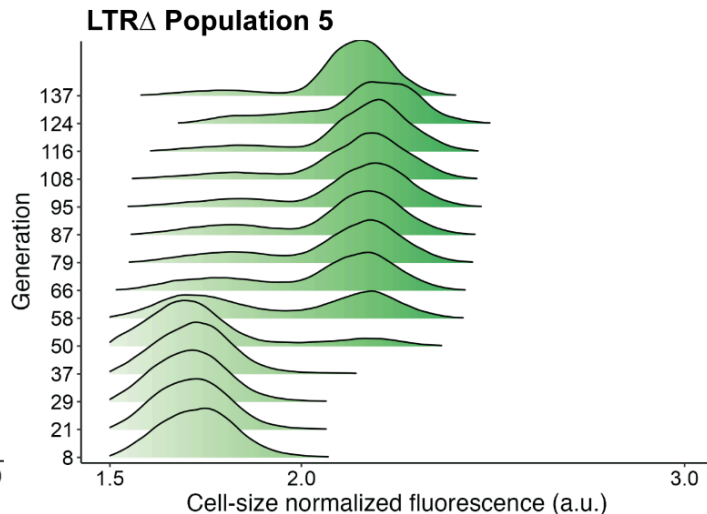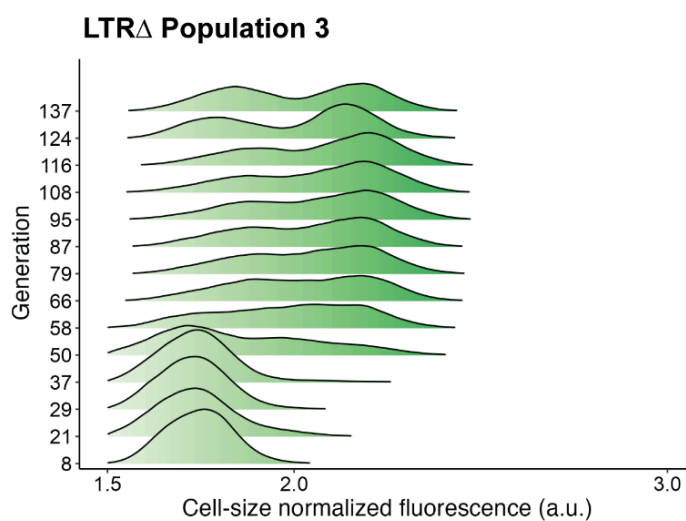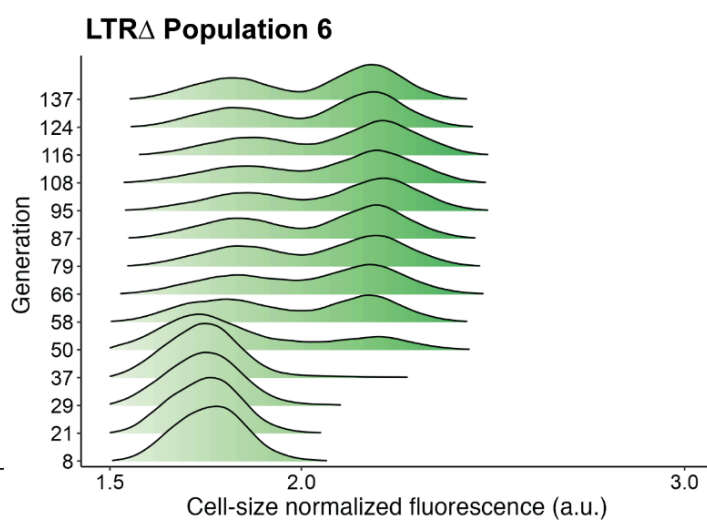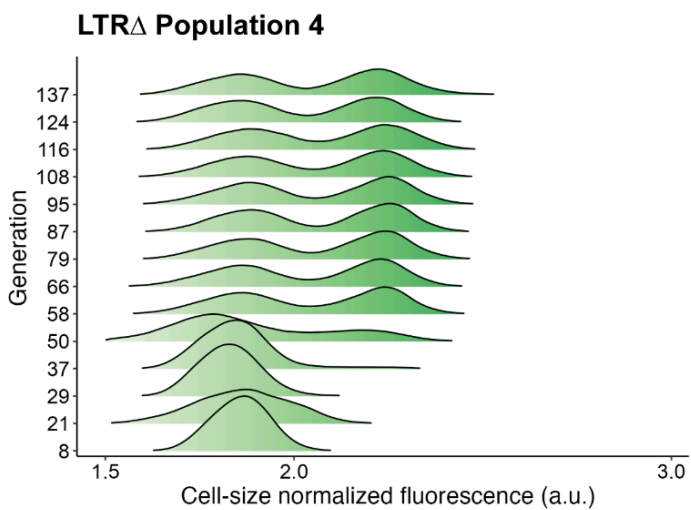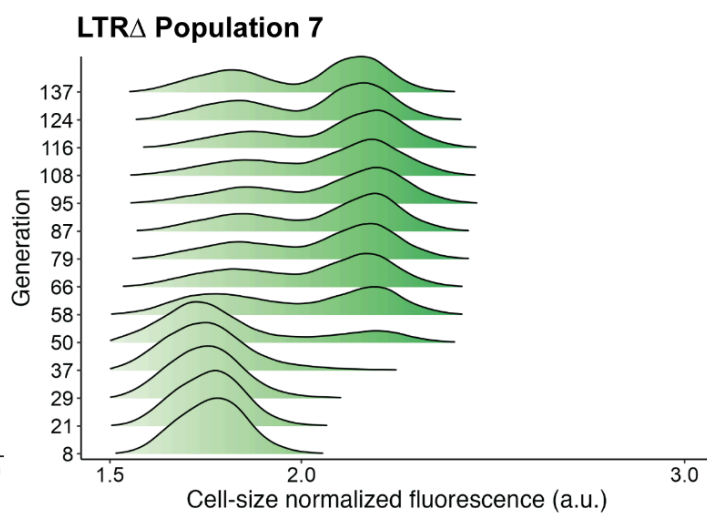

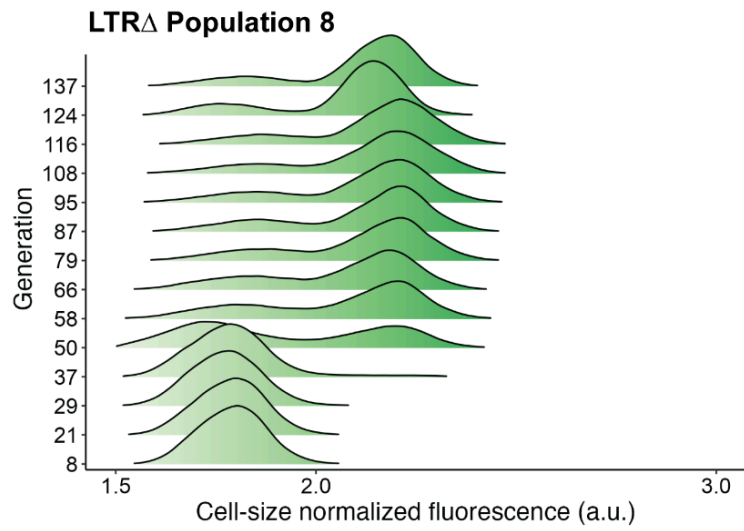

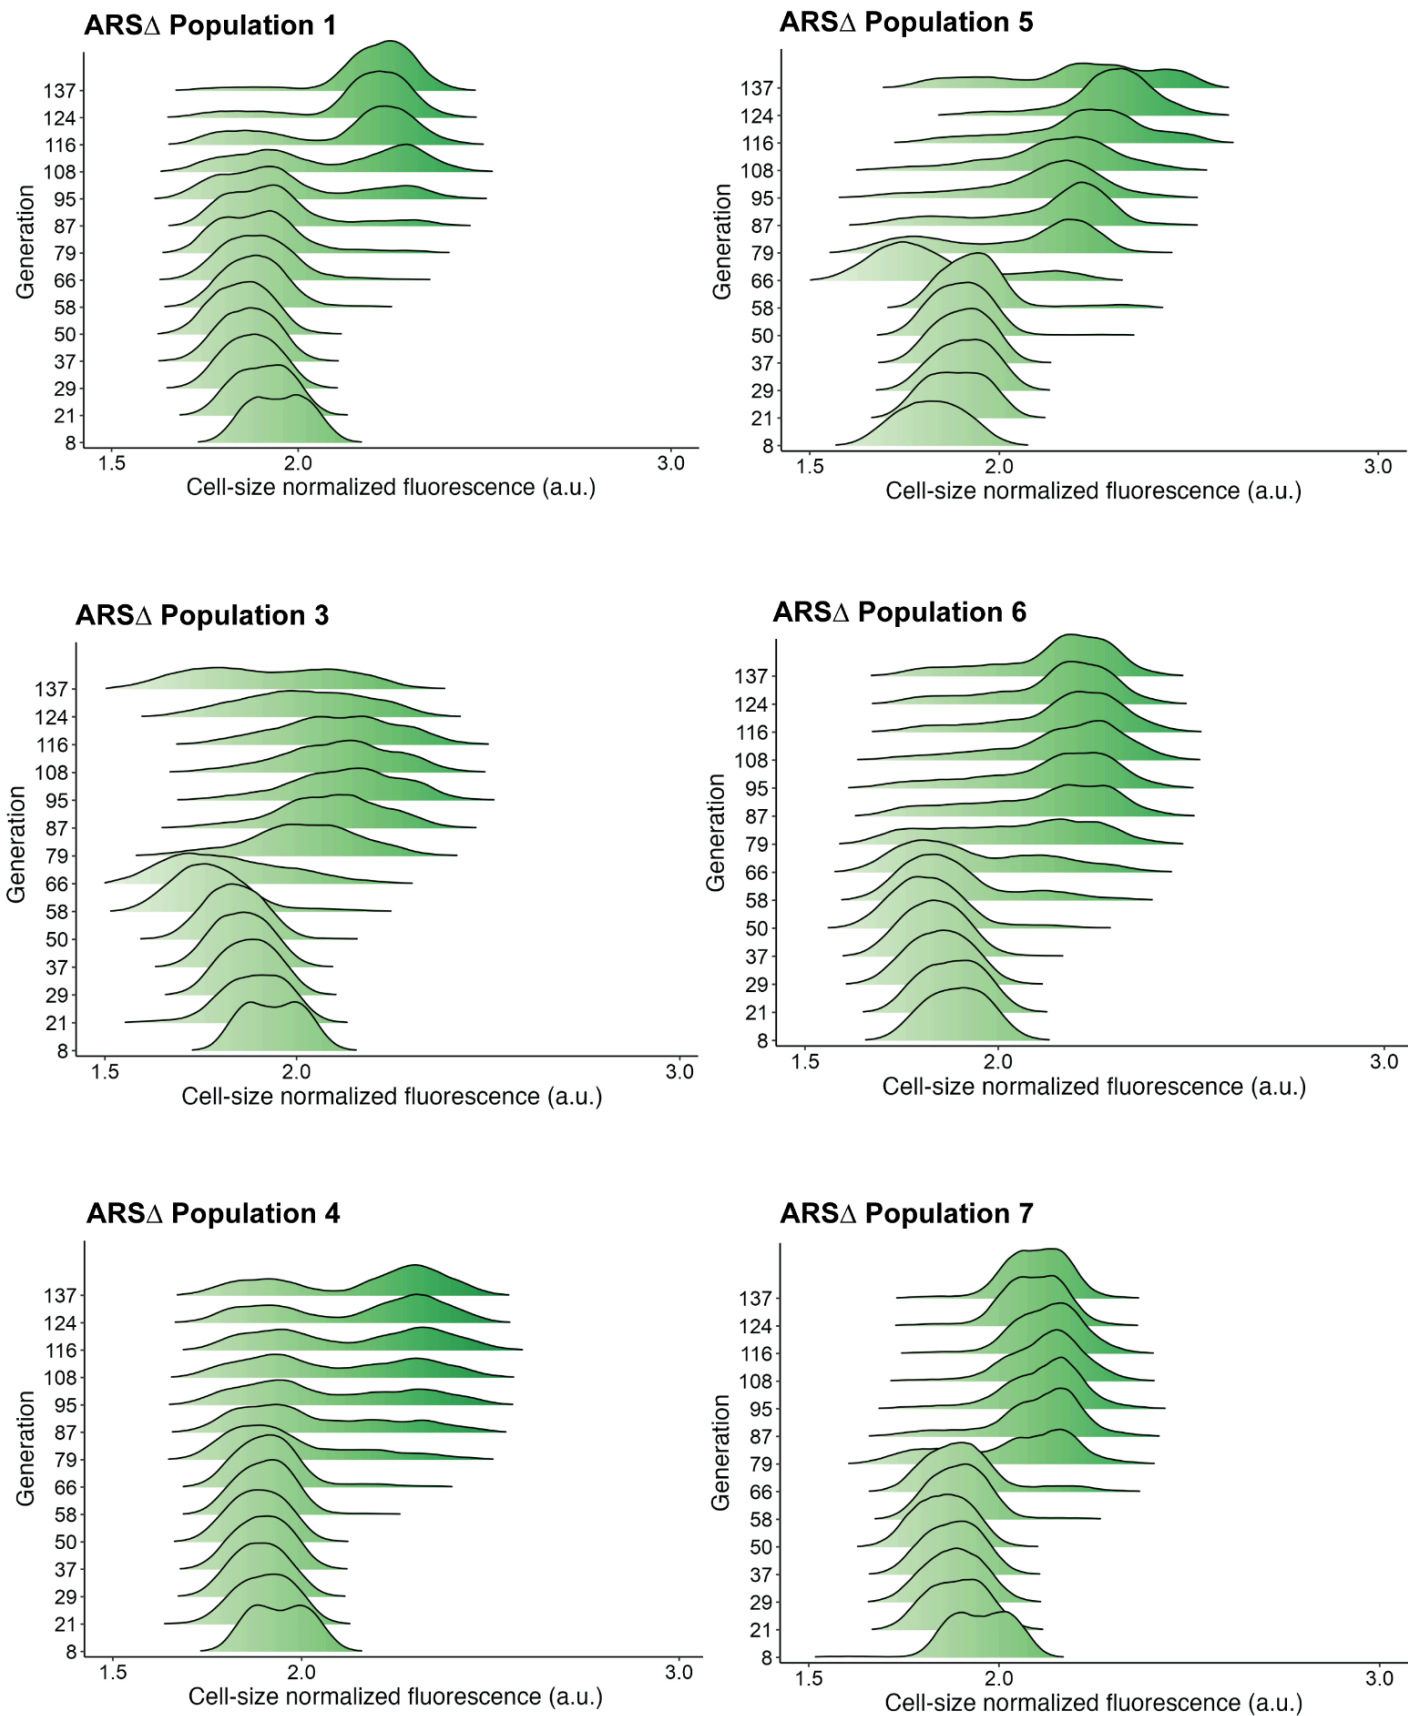

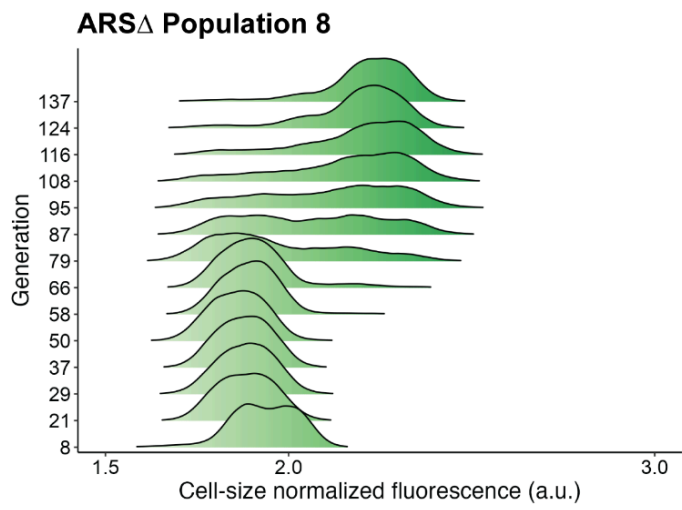

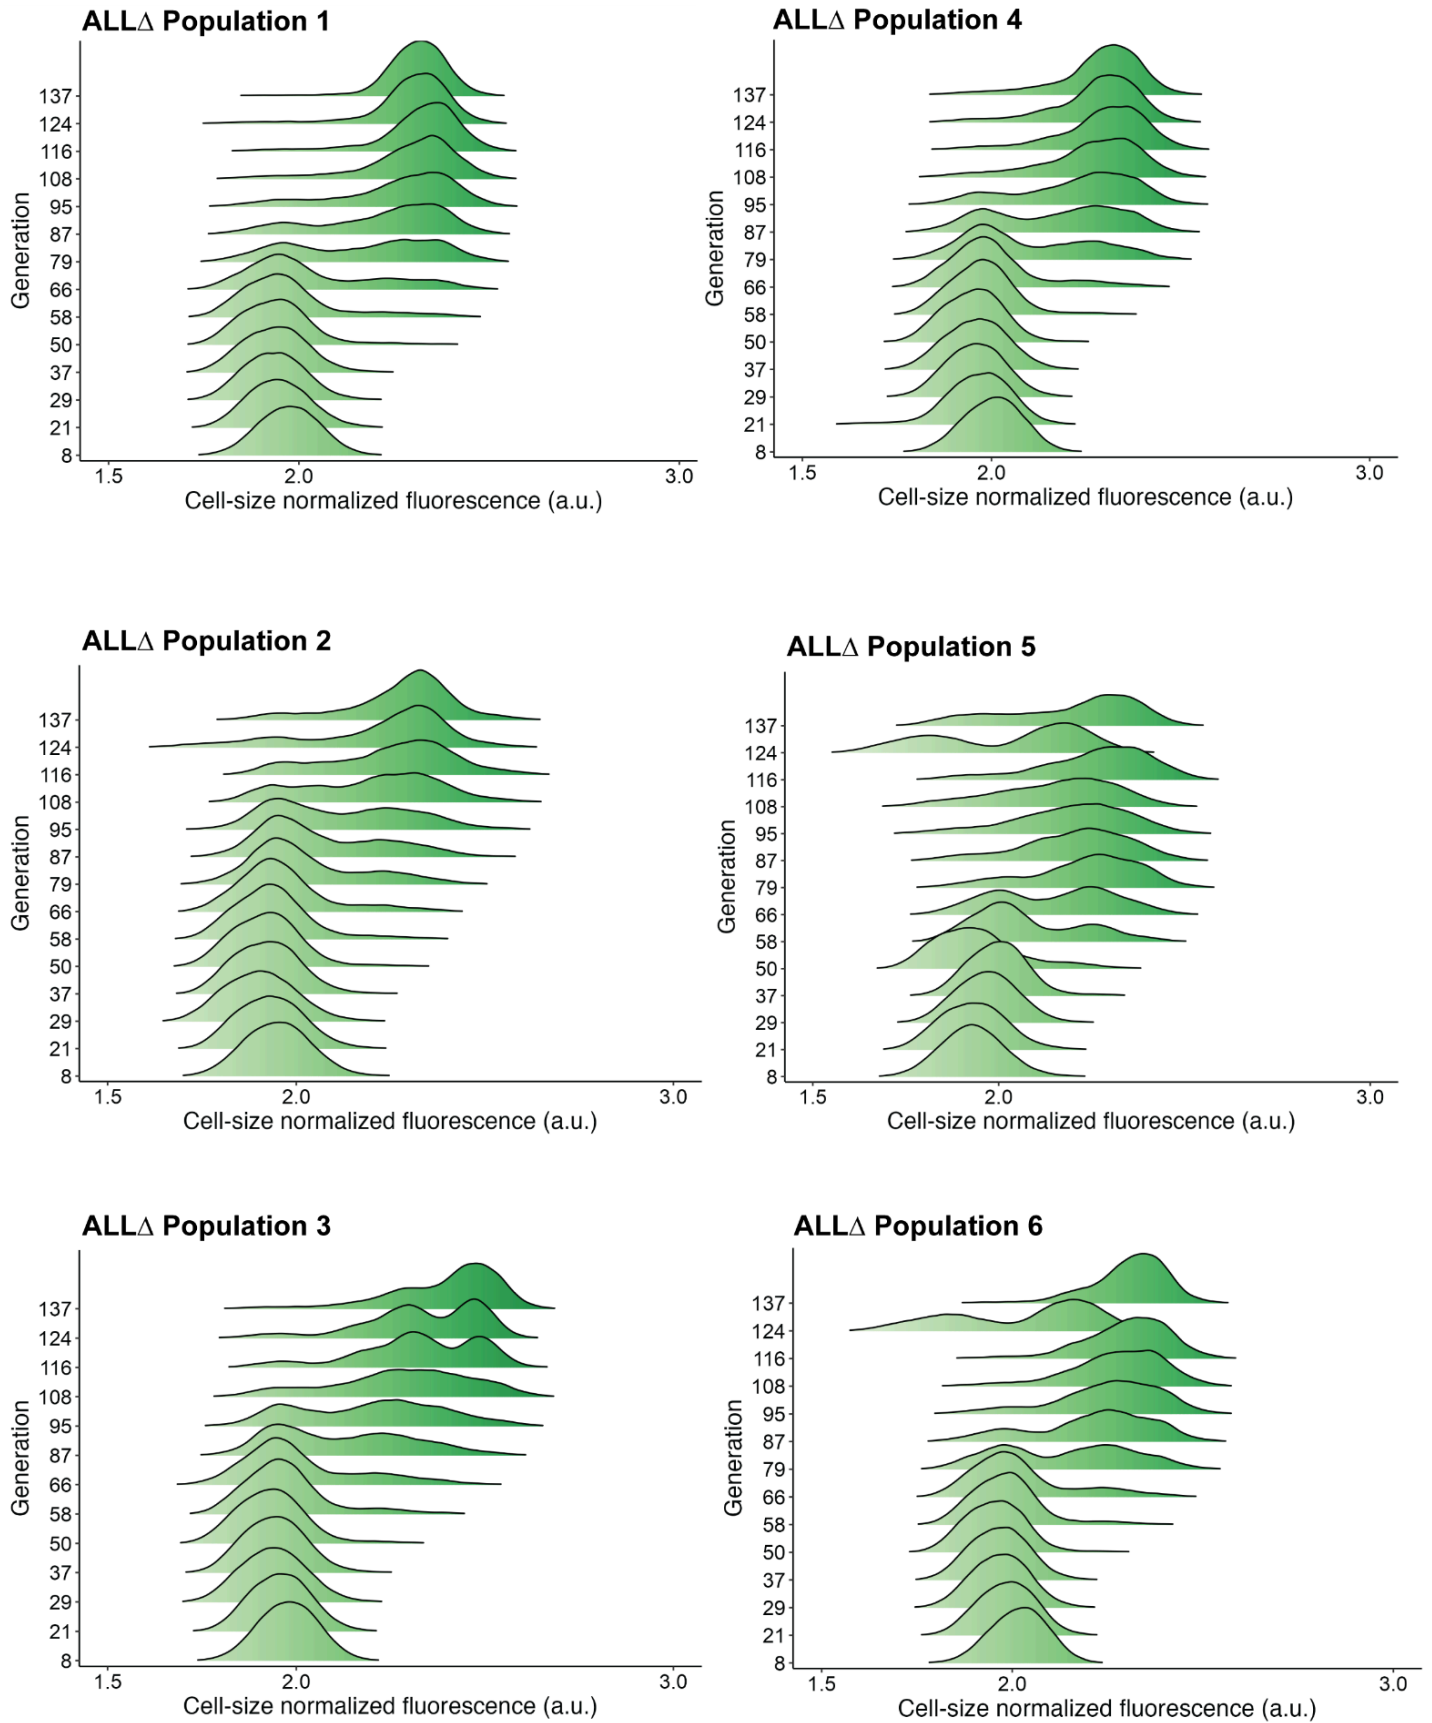



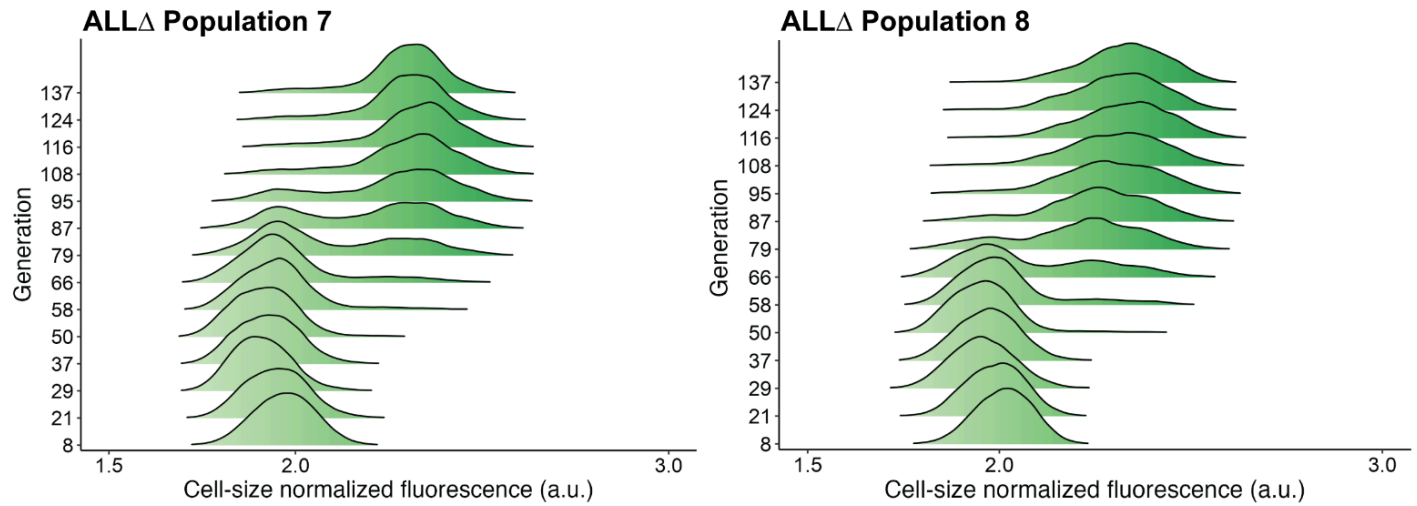

**Supplementary Figure 3. Population GFP Ridgeplots.** Density plots of cell-size normalized GFP fluorescence in arbitrary units (a.u.) for every population and timepoint over the course of long-term experimental evolution in glutamine-limited chemostats.

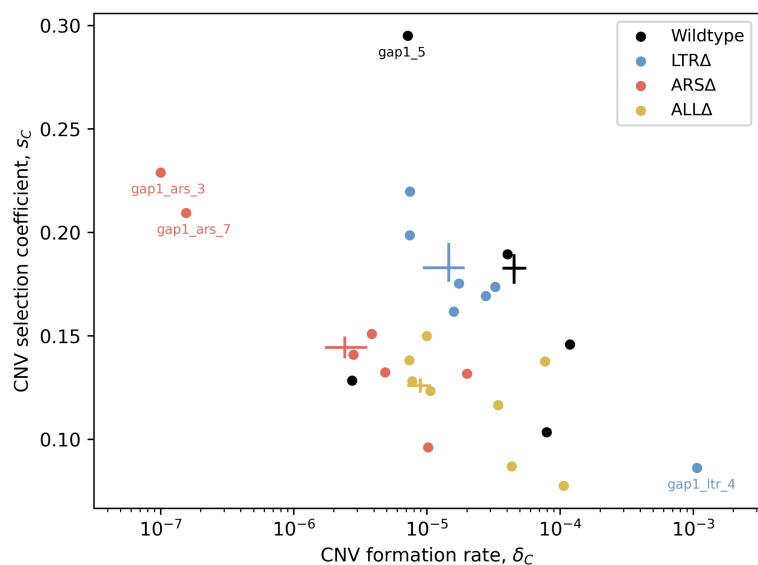

**Supplementary Figure 4. MAP estimates of *GAP1* CNV formation rates ( $\delta_c$ ) and selection coefficients ( $s_c$ ) for all replicate populations.** Markers show MAP estimates from individual replicates, crosses show 50% HDI of collective posteriors. Extreme points are marked for comparison to data and posterior prediction, see Supplementary Figure 5 for posterior predictive checks.

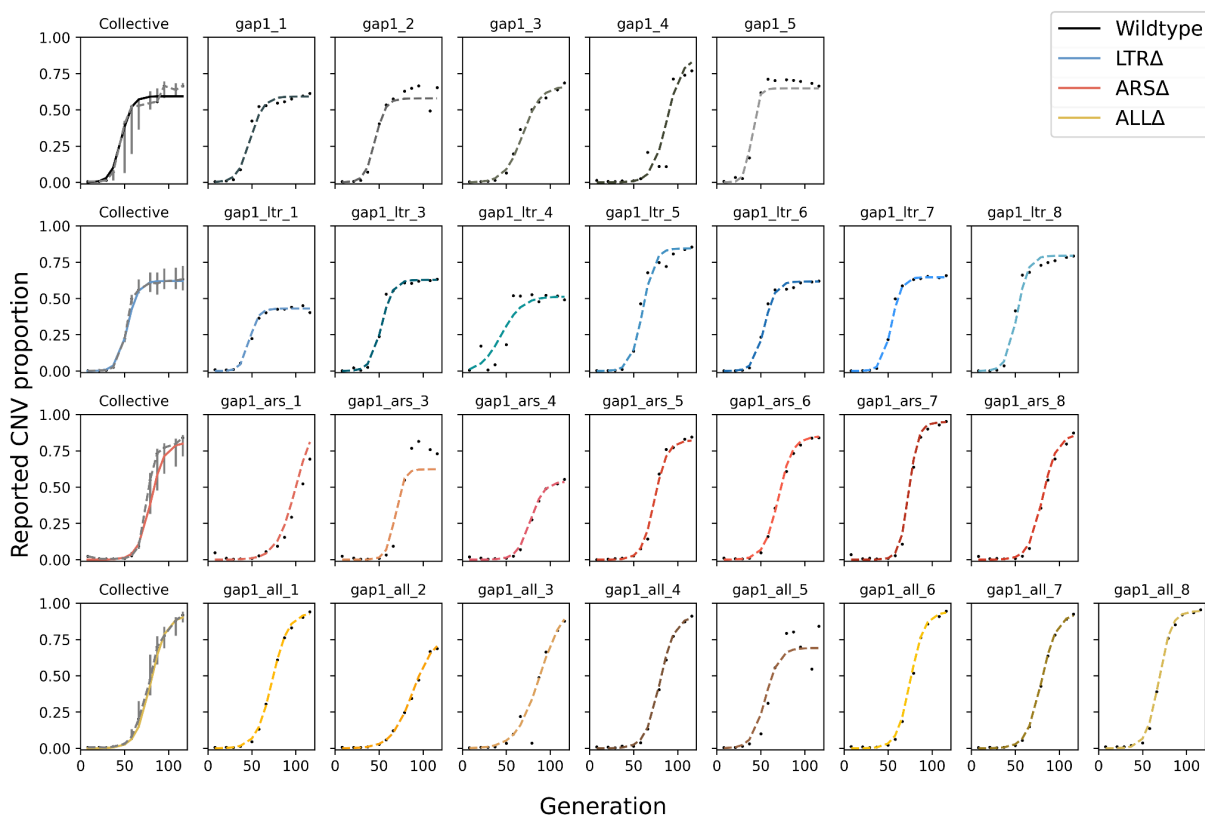

**Supplementary Figure 5. Posterior predictive checks for all replicates.** Black markers are the empirical observations, dashed line shows MAP prediction. The leftmost plot of each row shows the collective MAP prediction with empirical data's interquartile range (gray bars).

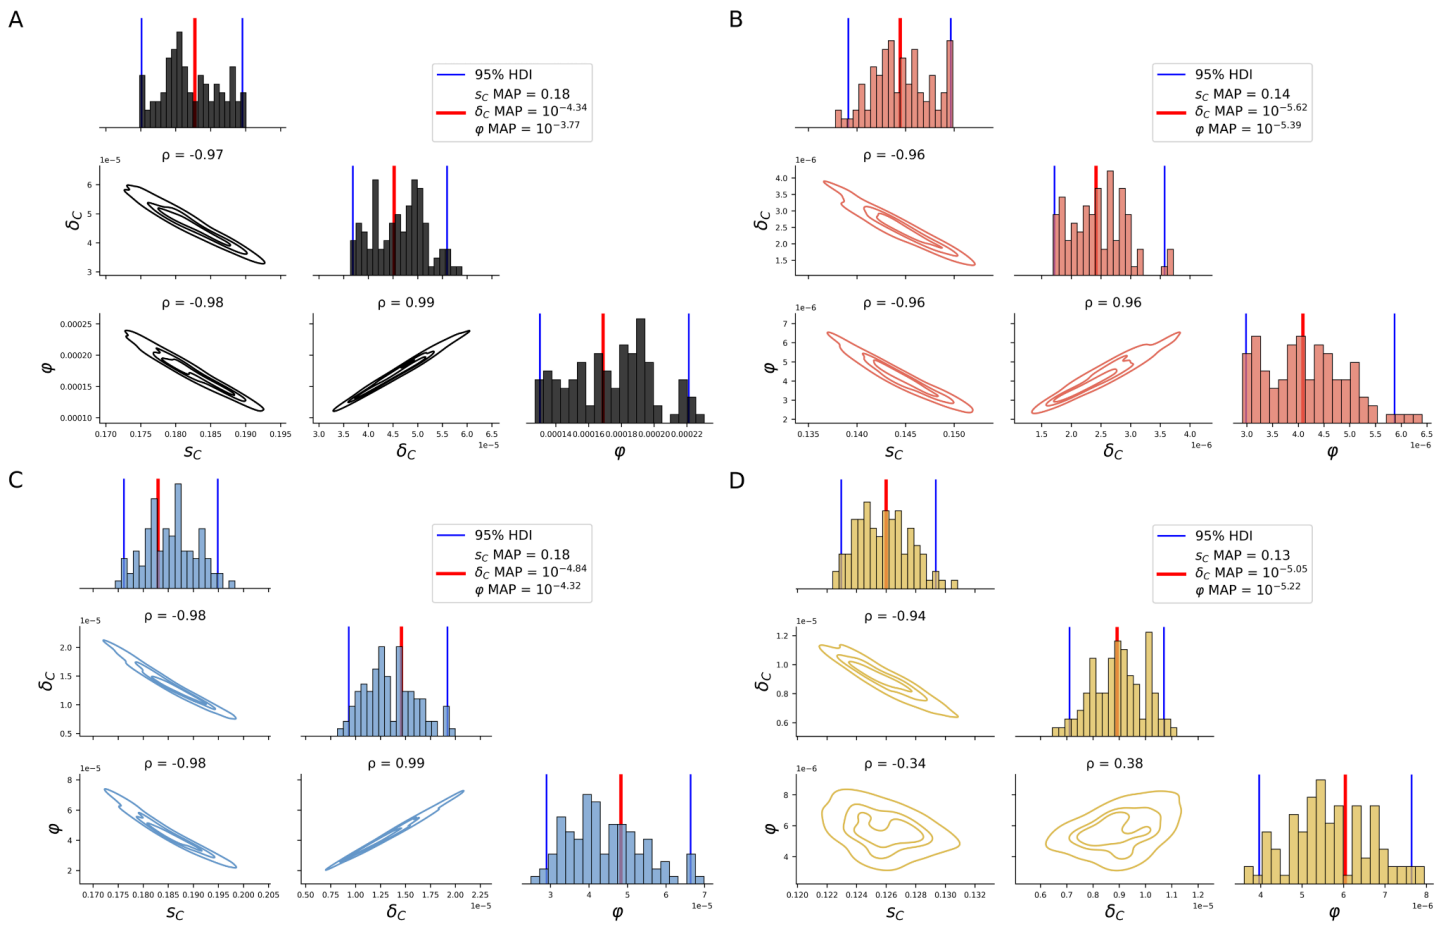

**Supplementary Figure 6. Pairwise and marginal collective posteriors for all estimated model parameters.**

Diagonals show marginal collective posteriors per parameter per strain. Below-diagonal plots show pairwise KDEs for all pairs of model parameters. Collective joint MAPs (which may differ from collective marginal MAPs, as the marginal distribution integrates over all other parameters), are marked by a red vertical line. Panels are separated by strain: **(A)** WT, **(B)** ARS $\Delta$ , **(C)** LTR $\Delta$ , **(D)** ALL $\Delta$ .

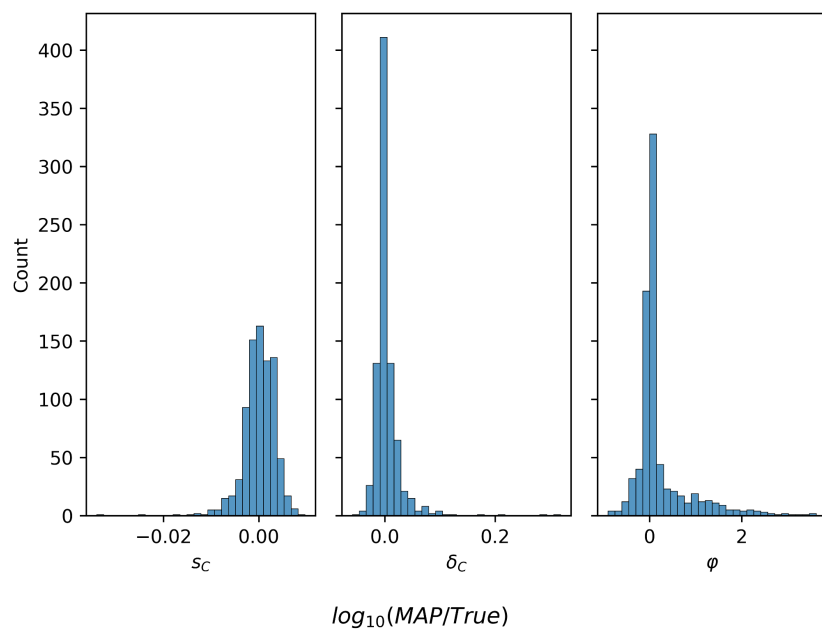

**Supplementary Figure 7. Parameter estimation accuracy on synthetic data.** Log-ratio of MAP estimate and true parameter value for 829 synthetic simulations in which the final reported *GAP1* CNV proportion is at least 0.3.

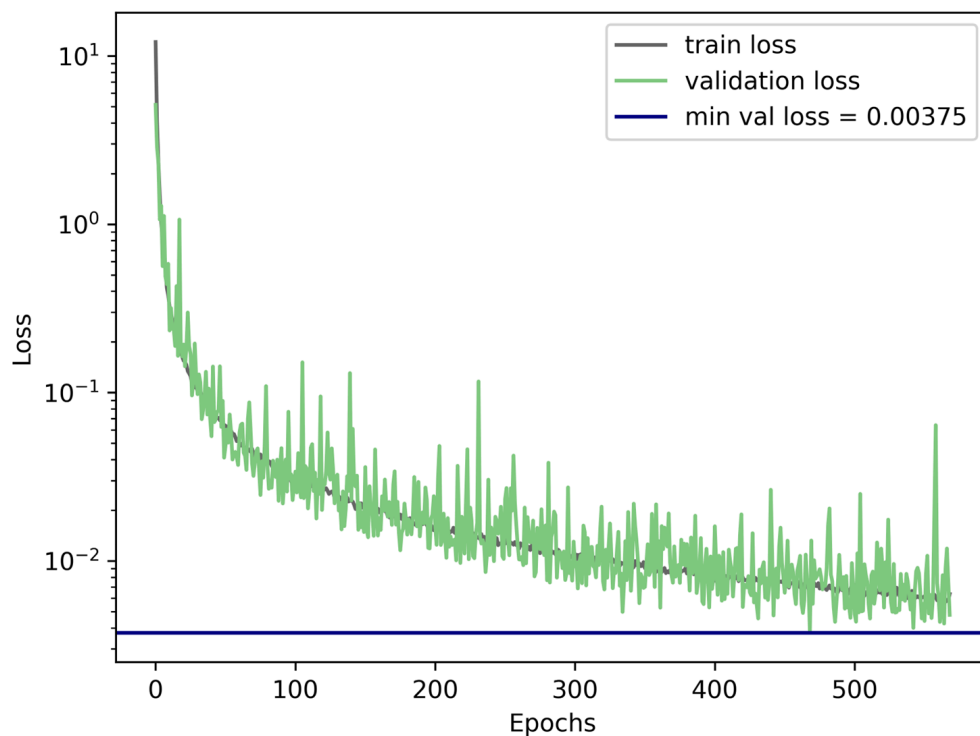

**Supplementary Figure 8. Neural density estimator training and validation loss during training.** Convergence threshold of 100 unimproved epochs (no decrease in minimal validation loss) was reached after 569 epochs.

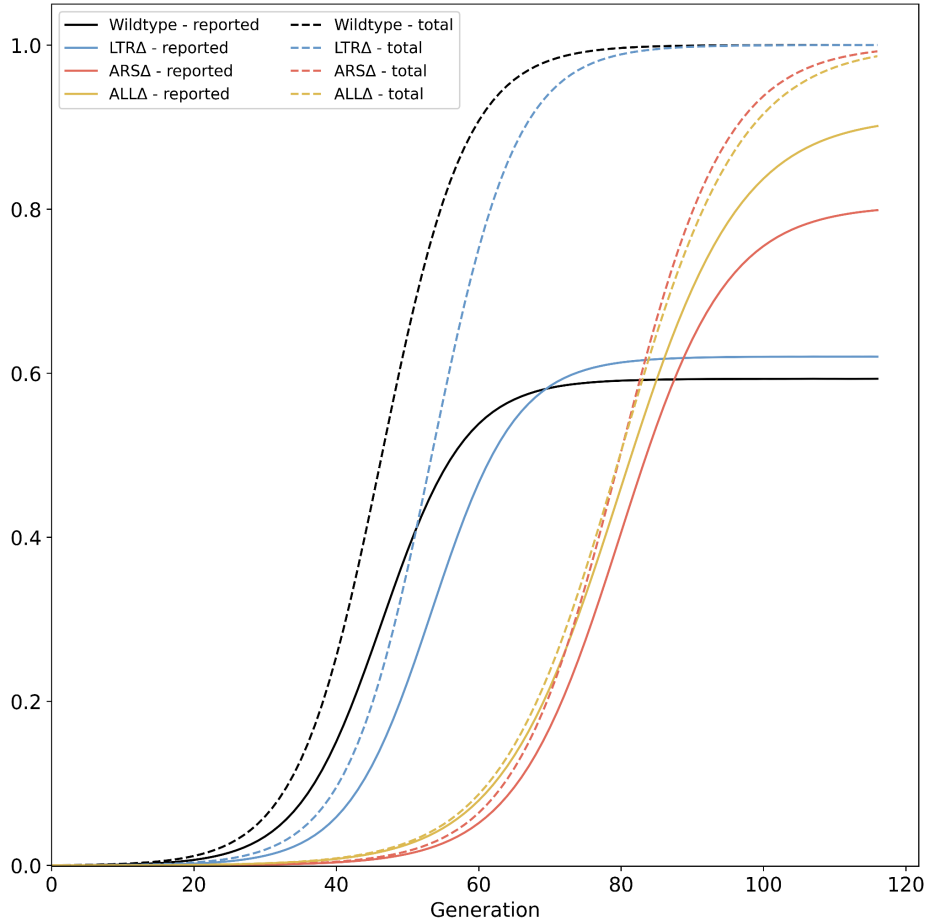

**Supplementary Figure 9. Total *GAP1* CNV frequency.** Solid lines show collective MAP predictions, dashed lines show the total proportion of *GAP1* CNVs, comprising unreported CNVs and reported CNVs generated during the experiment, as predicted by the evolutionary model.

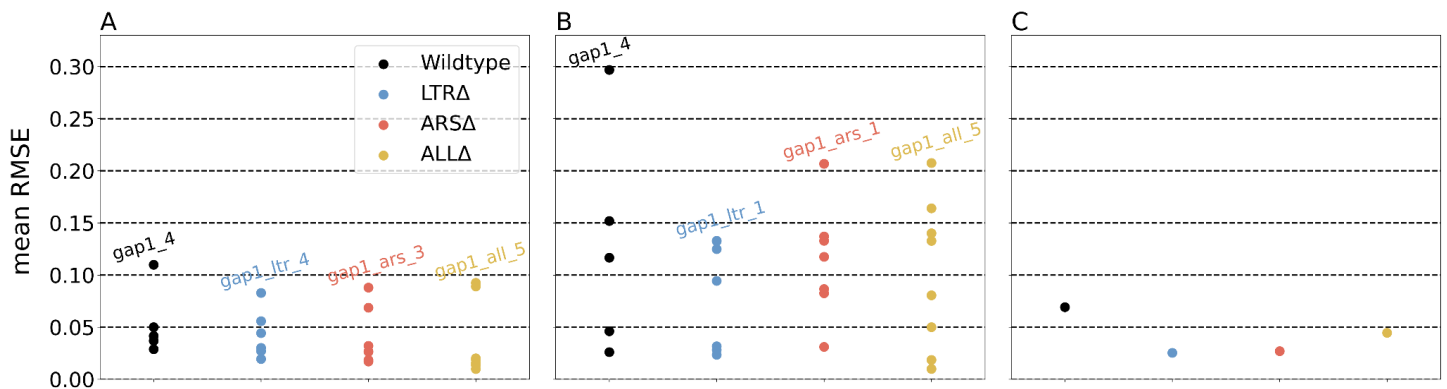

**Supplementary Figure 10. Error estimation of parameter inference.** Average root mean square errors (RMSE) of 50 posterior samples against the observed data. **(A)** Individual posteriors and individual replicates. **(B)** Collective posterior and individual replicates. **(C)** Collective posterior and empirical mean.

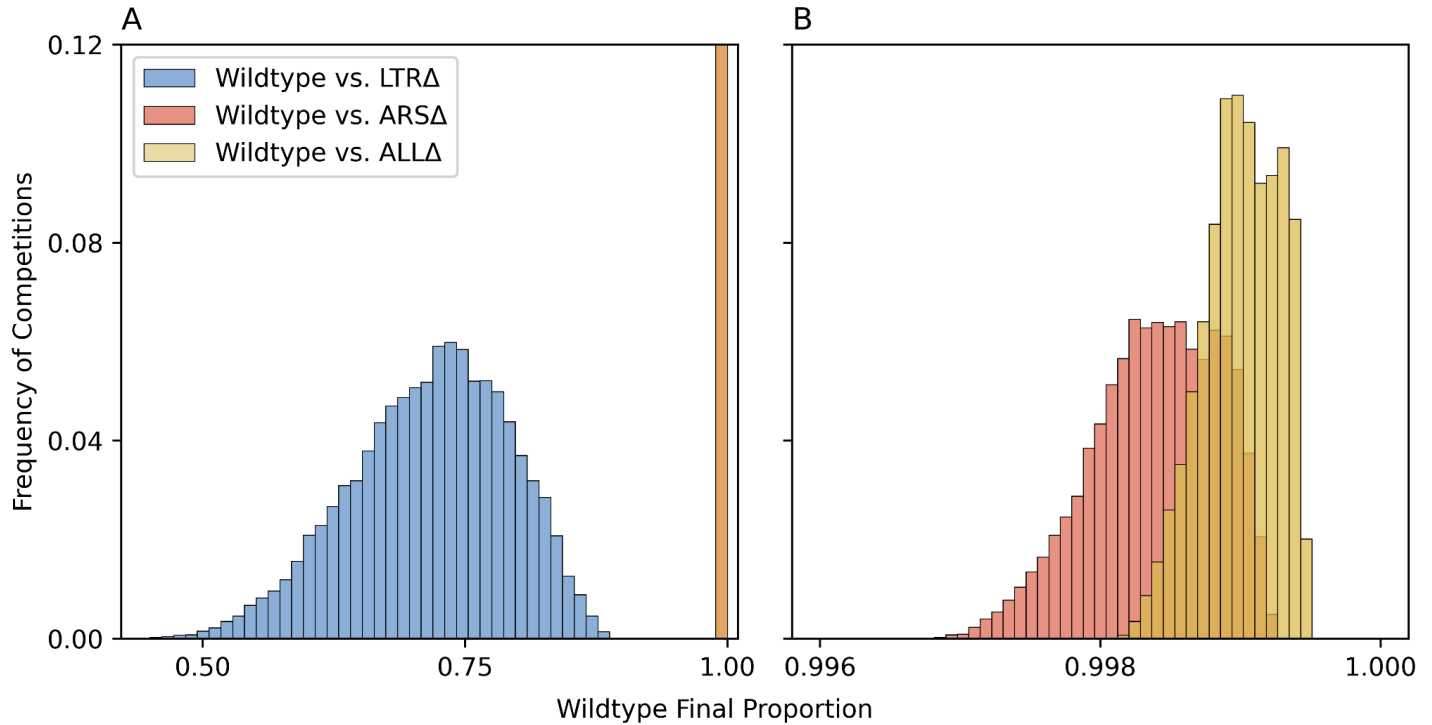

**Supplementary Figure 11. Pairwise evolutionary competition predictions.** We simulated evolutionary competitions in the experimental conditions of WT vs. genomic architecture mutants, starting from equal frequencies. The proportion at generation 116 of WT was predicted using 10,000 combinations of collective posterior samples for each pairwise competition. Overall, WT outcompetes all mutants because it adapts faster (due to faster CNV formation rate), but its advantage over ARS $\Delta$  and ALL $\Delta$  is much higher than its advantage over LTR $\Delta$ . **(A)** Histograms for three pairwise competitions. Note that ARS $\Delta$  and ALL $\Delta$  values overlap at this scale and are all in the rightmost bar. **(B)** High-resolution histograms for ARS $\Delta$  and ALL $\Delta$ .

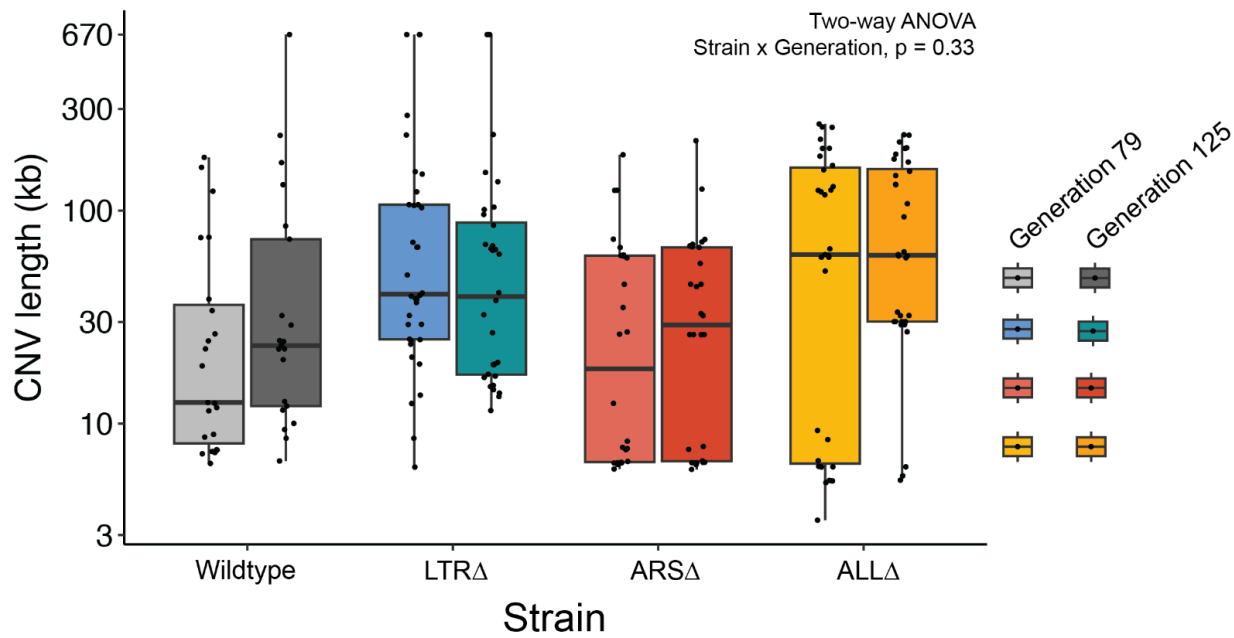

**Supplementary Figure 12. No significant interaction between strain and generation on CNV length.** Boxplot of CNV length of clones by strain and generation of isolation. There is no significant interaction between strain and generation of isolated clone, and no significant effect of generation on CNV length (Two-way ANOVA, Strain x Generation,  $p = 0.33$ )

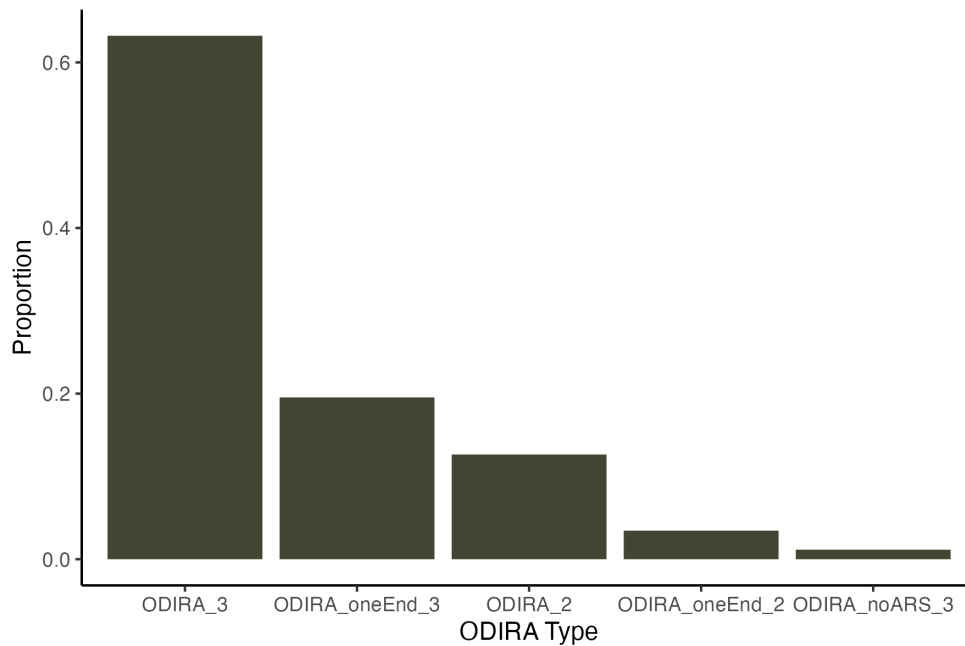

**Supplementary Figure 13. Types of ODIRA detected.** We found 87 ODIRA clones total regardless of strain. The majority of ODIRA clones fit the canonical definition of having two inverted junctions and 3 copies, 55/87 clones (63%) (ODIRA\_3). We found four non-canonical types. We found 17 clones (20%) with only one inverted junction detected and 3 copies (ODIRA\_oneEnd\_3). We found 11 clones (13%) with two inverted junctions but only 2 copies (ODIRA\_2) which may result from hairpin-capped double strand break repair. We found 3 clones (3.4%) with only one inverted junction detected and 2 copies (ODIRA\_oneEnd\_2). We found 1 clone (1.1%) with two inverted junctions but the amplified region did not contain an ARS.

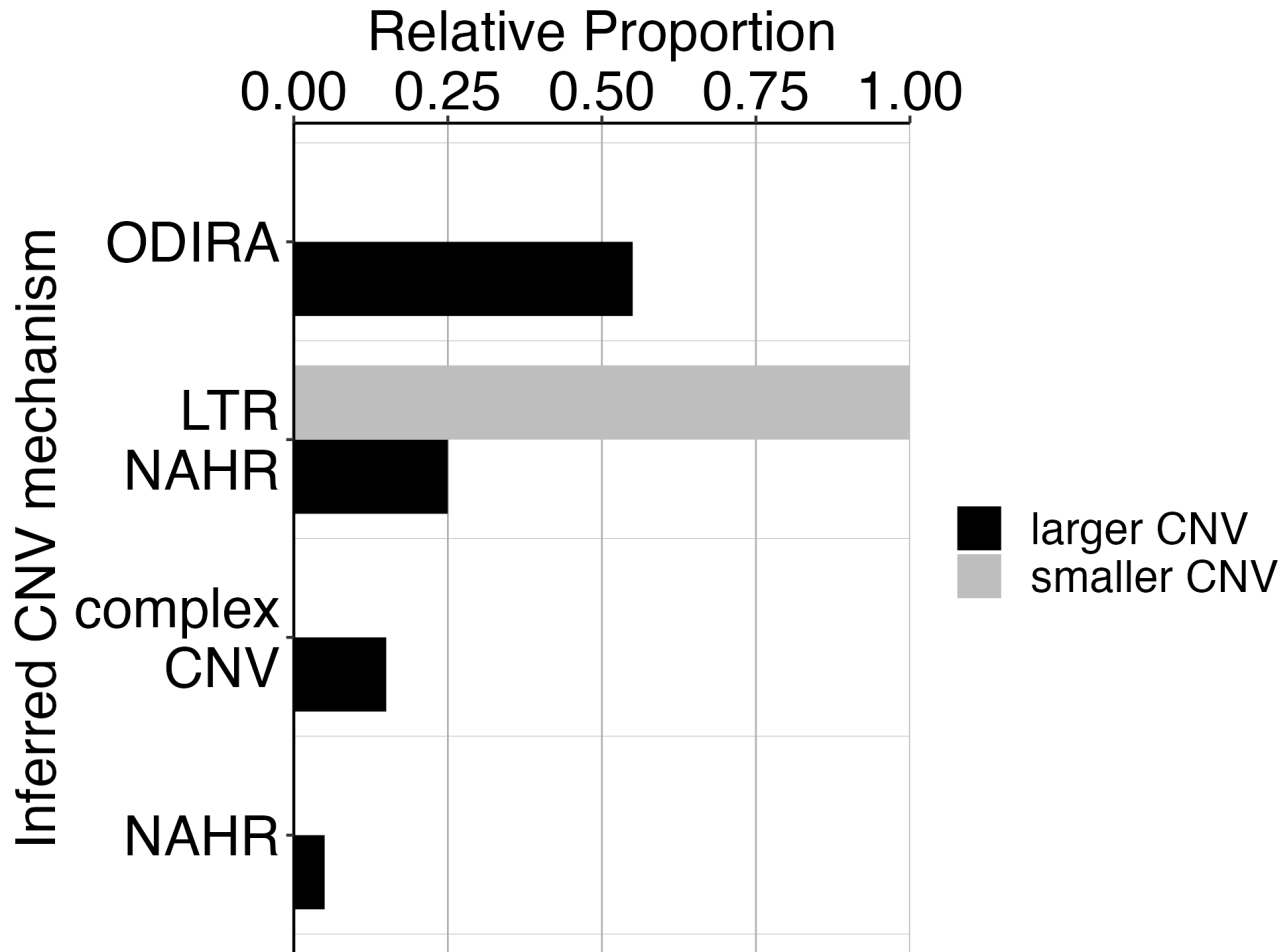

**Supplementary Figure 14. CNV mechanisms in ARS $\Delta$  clones.** Two CNV sizes in ARS $\Delta$  clones correspond to different CNV mechanisms. We found two different groups of CNV lengths in the ARS $\Delta$  clones. 100% of smaller CNVs (6-8kb) correspond with a mechanism of NAHR between LTRs flanking the *GAP1* gene. Larger CNVs (8kb-200kb) correspond with other mechanisms that tend to produce larger CNVs, including ODIRA and NAHR between distal LTR elements. The smaller CNVs are indeed focal amplifications of *GAP1* that are 8kb or less.



## Supplementary Files

**Supplementary File 1.** Ty-associated clones and locations of novel Ty insertions.

**Supplementary File 2.** CNV Clone Sequencing Analysis
